# Supplementary material for: A Magnetic Ni-based Metal-Organic Framework with Interesting Transformation Dynamics
Source: Preprints.org preprint supplement (doi:10.20944/preprints202308.0664.v1), 2023-08-08

## checkCIF/PLATON report

Structure factors have been supplied for datablock(s) mo\_niso\_pl

THIS REPORT IS FOR GUIDANCE ONLY. IF USED AS PART OF A REVIEW PROCEDURE FOR PUBLICATION, IT SHOULD NOT REPLACE THE EXPERTISE OF AN EXPERIENCED CRYSTALLOGRAPHIC REFEREE.

No syntax errors found.      CIF dictionary      Interpreting this report

### Datablock: mo\_niso\_pl

---

Bond precision:      C-C = 0.0054 Å      Wavelength=0.71073

Cell:                      a=11.9437(19)              b=6.7402(14)              c=10.6610(18)  
                                alpha=90              beta=90              gamma=90

Temperature:              100 K

|                        | Calculated                  | Reported                    |
|------------------------|-----------------------------|-----------------------------|
| Volume                 | 858.2(3)                    | 858.2(3)                    |
| Space group            | P n n 2                     | P n n 2                     |
| Hall group             | P 2 -2n                     | P 2 -2n                     |
| Moiety formula         | C12 H10 N4 Ni O4, C3 H7 N O | C12 H10 N4 Ni O4, C3 H7 N O |
| Sum formula            | C15 H17 N5 Ni O5            | C15 H17 N5 Ni O5            |
| Mr                     | 406.03                      | 406.04                      |
| Dx, g cm <sup>-3</sup> | 1.571                       | 1.571                       |
| Z                      | 2                           | 2                           |
| Mu (mm <sup>-1</sup> ) | 1.168                       | 1.168                       |
| F000                   | 420.0                       | 420.0                       |
| F000'                  | 420.84                      |                             |
| h, k, lmax             | 19, 10, 17                  | 17, 10, 15                  |
| Nref                   | 3663[ 1911]                 | 2814                        |
| Tmin, Tmax             | 0.845, 0.890                | 0.811, 1.000                |
| Tmin'                  | 0.810                       |                             |

Correction method= # Reported T Limits: Tmin=0.811 Tmax=1.000  
AbsCorr = MULTI-SCAN

Data completeness= 1.47/0.77      Theta(max)= 34.537

|                               |                                 |
|-------------------------------|---------------------------------|
| R(reflections)= 0.0410( 2570) | wR2(reflections)= 0.0941( 2814) |
| S = 1.075                     | Npar= 136                       |

---

The following ALERTS were generated. Each ALERT has the format

**test-name\_ALERT\_alert-type\_alert-level.**

Click on the hyperlinks for more details of the test.

---

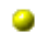

#### Alert level C

|                   |                                                         |      |        |
|-------------------|---------------------------------------------------------|------|--------|
| PLAT250_ALERT_2_C | Large U3/U1 Ratio for Average U(i,j) Tensor ....        | 2.4  | Note   |
| PLAT712_ALERT_1_C | ANGLE      Unknown or Inconsistent Label .....          | C51B | Check  |
|                   | C51B                      C5B                      H52B |      |        |
| PLAT712_ALERT_1_C | ANGLE      Unknown or Inconsistent Label .....          | C51B | Check  |
|                   | C51B                      C5B                      H53B |      |        |
| PLAT712_ALERT_1_C | ANGLE      Unknown or Inconsistent Label .....          | C52B | Check  |
|                   | C52B                      C5B                      H53B |      |        |
| PLAT911_ALERT_3_C | Missing FCF Refl Between Thmin & STh/L=      0.600      | 14   | Report |
| PLAT913_ALERT_3_C | Missing # of Very Strong Reflections in FCF ....        | 8    | Note   |
| PLAT934_ALERT_3_C | Number of (Iobs-Icalc)/Sigma(W) > 10 Outliers ..        | 1    | Check  |

---

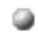

#### Alert level G

|                   |                                                                                 |        |        |
|-------------------|---------------------------------------------------------------------------------|--------|--------|
| PLAT002_ALERT_2_G | Number of Distance or Angle Restraints on AtSite                                | 3      | Note   |
| PLAT003_ALERT_2_G | Number of Uiso or Uij Restrained non-H Atoms ...                                | 5      | Report |
| PLAT004_ALERT_5_G | Polymeric Structure Found with Maximum Dimension                                | 3      | Info   |
| PLAT007_ALERT_5_G | Number of Unrefined Donor-H Atoms .....                                         | 2      | Report |
| PLAT012_ALERT_1_G | N.O.K.      _shelx_res_checksum Found in CIF .....                              | Please | Check  |
| PLAT174_ALERT_4_G | The CIF-Embedded .res File Contains FLAT Records                                | 1      | Report |
| PLAT176_ALERT_4_G | The CIF-Embedded .res File Contains SADI Records                                | 1      | Report |
| PLAT178_ALERT_4_G | The CIF-Embedded .res File Contains SIMU Records                                | 2      | Report |
| PLAT187_ALERT_4_G | The CIF-Embedded .res File Contains RIGU Records                                | 1      | Report |
| PLAT188_ALERT_3_G | A Non-default SIMU Restraint Value has been used                                | 0.0200 | Report |
| PLAT300_ALERT_4_G | Atom Site Occupancy of O1B                      Constrained at                  | 0.5    | Check  |
| PLAT300_ALERT_4_G | Atom Site Occupancy of N3B                      Constrained at                  | 0.5    | Check  |
| PLAT300_ALERT_4_G | Atom Site Occupancy of C2B                      Constrained at                  | 0.5    | Check  |
| PLAT300_ALERT_4_G | Atom Site Occupancy of C4B                      Constrained at                  | 0.5    | Check  |
| PLAT300_ALERT_4_G | Atom Site Occupancy of C5B                      Constrained at                  | 0.5    | Check  |
| PLAT300_ALERT_4_G | Atom Site Occupancy of H2B                      Constrained at                  | 0.5    | Check  |
| PLAT300_ALERT_4_G | Atom Site Occupancy of H41B                      Constrained at                 | 0.5    | Check  |
| PLAT300_ALERT_4_G | Atom Site Occupancy of H42B                      Constrained at                 | 0.5    | Check  |
| PLAT300_ALERT_4_G | Atom Site Occupancy of H43B                      Constrained at                 | 0.5    | Check  |
| PLAT300_ALERT_4_G | Atom Site Occupancy of H51B                      Constrained at                 | 0.5    | Check  |
| PLAT300_ALERT_4_G | Atom Site Occupancy of H52B                      Constrained at                 | 0.5    | Check  |
| PLAT300_ALERT_4_G | Atom Site Occupancy of H53B                      Constrained at                 | 0.5    | Check  |
| PLAT302_ALERT_4_G | Anion/Solvent/Minor-Residue Disorder (Resd 2 )                                  | 100%   | Note   |
| PLAT789_ALERT_4_G | Atoms with Negative _atom_site_disorder_group #                                 | 12     | Check  |
| PLAT794_ALERT_5_G | Tentative Bond Valency for Ni1                      (II)                      . | 2.02   | Info   |
| PLAT802_ALERT_4_G | CIF Input Record(s) with more than 80 Characters                                | 3      | Info   |
| PLAT822_ALERT_4_G | CIF-embedded .res Contains Negative PART Numbers                                | 1      | Check  |
| PLAT860_ALERT_3_G | Number of Least-Squares Restraints .....                                        | 52     | Note   |
| PLAT883_ALERT_1_G | No Info/Value for _atom_sites_solution_primary .                                | Please | Do !   |
| PLAT910_ALERT_3_G | Missing # of FCF Reflection(s) Below Theta(Min).                                | 1      | Note   |
| PLAT912_ALERT_4_G | Missing # of FCF Reflections Above STh/L=      0.600                            | 219    | Note   |
| PLAT915_ALERT_3_G | No Flack x Check Done: Low Friedel Pair Coverage                                | 67     | %      |
| PLAT950_ALERT_5_G | Calculated (ThMax) and CIF-Reported Hmax Differ                                 | 2      | Units  |
| PLAT952_ALERT_5_G | Calculated (ThMax) and CIF-Reported Lmax Differ.                                | 2      | Units  |
| PLAT956_ALERT_1_G | Calculated (ThMax) and Actual (FCF) Hmax Differ                                 | 2      | Units  |
| PLAT958_ALERT_1_G | Calculated (ThMax) and Actual (FCF) Lmax Differ.                                | 2      | Units  |
| PLAT978_ALERT_2_G | Number C-C Bonds with Positive Residual Density.                                | 2      | Info   |

---

|    |                      |                                                              |
|----|----------------------|--------------------------------------------------------------|
| 0  | <b>ALERT level A</b> | = Most likely a serious problem - resolve or explain         |
| 0  | <b>ALERT level B</b> | = A potentially serious problem, consider carefully          |
| 7  | <b>ALERT level C</b> | = Check. Ensure it is not caused by an omission or oversight |
| 37 | <b>ALERT level G</b> | = General information/check it is not something unexpected   |
| 7  | ALERT type 1         | CIF construction/syntax error, inconsistent or missing data  |
| 4  | ALERT type 2         | Indicator that the structure model may be wrong or deficient |
| 7  | ALERT type 3         | Indicator that the structure quality may be low              |
| 21 | ALERT type 4         | Improvement, methodology, query or suggestion                |
| 5  | ALERT type 5         | Informative message, check                                   |

---

It is advisable to attempt to resolve as many as possible of the alerts in all categories. Often the minor alerts point to easily fixed oversights, errors and omissions in your CIF or refinement strategy, so attention to these fine details can be worthwhile. In order to resolve some of the more serious problems it may be necessary to carry out additional measurements or structure refinements. However, the purpose of your study may justify the reported deviations and the more serious of these should normally be commented upon in the discussion or experimental section of a paper or in the "special\_details" fields of the CIF. checkCIF was carefully designed to identify outliers and unusual parameters, but every test has its limitations and alerts that are not important in a particular case may appear. Conversely, the absence of alerts does not guarantee there are no aspects of the results needing attention. It is up to the individual to critically assess their own results and, if necessary, seek expert advice.

### **Publication of your CIF in IUCr journals**

A basic structural check has been run on your CIF. These basic checks will be run on all CIFs submitted for publication in IUCr journals (*Acta Crystallographica*, *Journal of Applied Crystallography*, *Journal of Synchrotron Radiation*); however, if you intend to submit to *Acta Crystallographica Section C* or *E* or *IUCrData*, you should make sure that full publication checks are run on the final version of your CIF prior to submission.

### **Publication of your CIF in other journals**

Please refer to the *Notes for Authors* of the relevant journal for any special instructions relating to CIF submission.

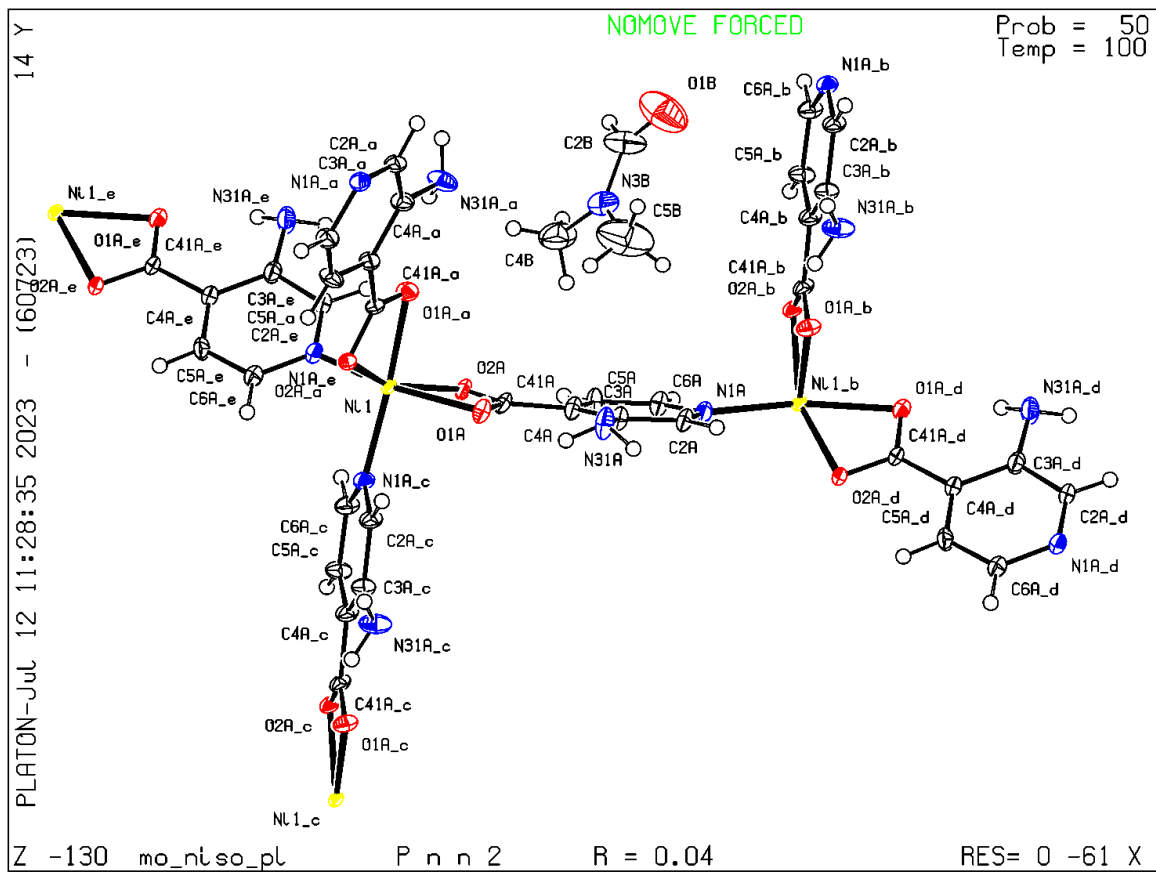

Supplement: Supplementary file 1 [file supplementary]
