# Supplementary material for: A Magnetic Ni-based Metal-Organic Framework with Interesting Transformation Dynamics
Source: Preprints.org preprint supplement (doi:10.20944/preprints202308.0664.v1), 2023-08-08
Supplement: Supplementary file 2 [file supplementary]

Archive with 3 entries (3 files):
- ESI/Checkcif_Compound1.pdf
- ESI/Compound1.cif
- ESI/ESI_Magnetochemistry_Ni3isoani.docx
