# Supplementary material for: A Magnetic Ni-based Metal-Organic Framework with Interesting Transformation Dynamics
Source: Preprints.org preprint supplement (doi:10.20944/preprints202308.0664.v1), 2023-08-08
Supplement: Supplementary file 2 [file supplementary › ESI/Compound1.cif]

data_Compound1
_audit_creation_date               2023-07-11
_audit_creation_method
;
Olex2 1.5
(compiled 2023.03.06 svn.rbb2c1857 for OlexSys, GUI svn.r6748)
;
_shelx_SHELXL_version_number       '2018/3'
_audit_contact_author_address      ?
_audit_contact_author_email        ?
_audit_contact_author_name         ''
_audit_contact_author_phone        ?
_publ_contact_author_id_orcid      ?
_publ_section_references
;
D. Kratzert, I. Krossing, (2018), J. Appl. Cryst. 51, 928-934. 

Dolomanov, O.V., Bourhis, L.J., Gildea, R.J, Howard, J.A.K. & Puschmann, H.
 (2009), J. Appl. Cryst. 42, 339-341.

Kratzert, D., Holstein, J.J. & Krossing, I. (2015). J. Appl. Cryst. 48, 933-938.

Sheldrick, G.M. (2015). Acta Cryst. C2B1, 3-8.
;
_chemical_name_common              ?
_chemical_name_systematic          ?
_chemical_formula_moiety           'C12 H10 N4 Ni O4, C3 H7 N O'
_chemical_formula_sum              'C15 H17 N5 Ni O5'
_chemical_formula_weight           406.04
_chemical_absolute_configuration   unk
_chemical_melting_point            ?
_chemical_oxdiff_formula           NiOCNH
loop_
  _atom_type_symbol
  _atom_type_description
  _atom_type_scat_dispersion_real
  _atom_type_scat_dispersion_imag
  _atom_type_scat_source
 'C' 'C' 0.0033 0.0016 'International Tables Vol C Tables 4.2.6.8 and 6.1.1.4'
 'H' 'H' 0.0000 0.0000 'International Tables Vol C Tables 4.2.6.8 and 6.1.1.4'
 'N' 'N' 0.0061 0.0033 'International Tables Vol C Tables 4.2.6.8 and 6.1.1.4'
 'Ni' 'Ni' 0.3393 1.1124 'International Tables Vol C Tables 4.2.6.8 and 6.1.1.4'
 'O' 'O' 0.0106 0.0060 'International Tables Vol C Tables 4.2.6.8 and 6.1.1.4'

_shelx_space_group_comment
;
The symmetry employed for this shelxl refinement is uniquely defined
by the following loop, which should always be used as a source of
symmetry information in preference to the above space-group names.
They are only intended as comments.
;
_space_group_crystal_system        'orthorhombic'
_space_group_IT_number             34
_space_group_name_H-M_alt          'P n n 2'
_space_group_name_Hall             'P 2 -2n'
loop_
  _space_group_symop_operation_xyz
 'x, y, z'
 '-x, -y, z'
 '-x+1/2, y+1/2, z+1/2'
 'x+1/2, -y+1/2, z+1/2'

_cell_length_a                     11.9437(19)
_cell_length_b                     6.7402(14)
_cell_length_c                     10.6610(18)
_cell_angle_alpha                  90
_cell_angle_beta                   90
_cell_angle_gamma                  90
_cell_volume                       858.2(3)
_cell_formula_units_Z              2
_cell_measurement_reflns_used      6467
_cell_measurement_temperature      100.15
_cell_measurement_theta_max        34.2140
_cell_measurement_theta_min        1.7910
_shelx_estimated_absorpt_T_max     0.892
_shelx_estimated_absorpt_T_min     0.817
_exptl_absorpt_coefficient_mu      1.168
_exptl_absorpt_correction_T_max    1.00000
_exptl_absorpt_correction_T_min    0.81129
_exptl_absorpt_correction_type     multi-scan
_exptl_absorpt_process_details
;
CrysAlisPro 1.171.42.92a (Rigaku Oxford Diffraction, 2023)
Empirical absorption correction using spherical harmonics,
implemented in SCALE3 ABSPACK scaling algorithm.
;
_exptl_absorpt_special_details     ?
_exptl_crystal_colour              'clear red'
_exptl_crystal_colour_lustre       clear
_exptl_crystal_colour_primary      red
_exptl_crystal_density_diffrn      1.571
_exptl_crystal_density_meas        ?
_exptl_crystal_density_method      ?
_exptl_crystal_description         block
_exptl_crystal_F_000               420
_exptl_crystal_size_max            0.18
_exptl_crystal_size_mid            0.12
_exptl_crystal_size_min            0.1
_exptl_transmission_factor_max     ?
_exptl_transmission_factor_min     ?
_diffrn_reflns_av_R_equivalents    0.0521
_diffrn_reflns_av_unetI/netI       0.0405
_diffrn_reflns_Laue_measured_fraction_full  0.982
_diffrn_reflns_Laue_measured_fraction_max  0.858
_diffrn_reflns_limit_h_max         16
_diffrn_reflns_limit_h_min         -17
_diffrn_reflns_limit_k_max         9
_diffrn_reflns_limit_k_min         -10
_diffrn_reflns_limit_l_max         13
_diffrn_reflns_limit_l_min         -15
_diffrn_reflns_number              11015
_diffrn_reflns_point_group_measured_fraction_full  0.942
_diffrn_reflns_point_group_measured_fraction_max  0.768
_diffrn_reflns_theta_full          25.242
_diffrn_reflns_theta_max           34.537
_diffrn_reflns_theta_min           3.411
_diffrn_ambient_environment        N~2~
_diffrn_ambient_temperature        100.15
_diffrn_detector                   'CCD plate'
_diffrn_detector_area_resol_mean   ?
_diffrn_measured_fraction_theta_full  0.982
_diffrn_measured_fraction_theta_max  0.858
_diffrn_measurement_details
;
List of Runs (angles in degrees, time in seconds):

  # Type    Start    End  Width  t~exp~   \w     \q     \k     \f   Frames
--------------------------------------------------------------------------
  1  \f     85.03 246.03   1.00   20.00  77.95  -5.80  31.50    --   161
  2  \f    -60.62  85.38   1.00   20.00  14.70  -5.80 -59.25    --   146
;
_diffrn_measurement_device         'abstract diffractometer'
_diffrn_measurement_device_type    'Bruker APEX-II CCD'
_diffrn_measurement_method         '\f scans'
_diffrn_orient_matrix_type        
 'CrysAlisPro convention (1999,Acta A55,543-557)'
_diffrn_orient_matrix_UB_11        0.0548043000
_diffrn_orient_matrix_UB_12        -0.0488584000
_diffrn_orient_matrix_UB_13        0.0148227000
_diffrn_orient_matrix_UB_21        -0.0898703000
_diffrn_orient_matrix_UB_22        -0.0294751000
_diffrn_orient_matrix_UB_23        0.0103076000
_diffrn_orient_matrix_UB_31        -0.0020816000
_diffrn_orient_matrix_UB_32        -0.0161124000
_diffrn_orient_matrix_UB_33        -0.0641006000
_diffrn_radiation_monochromator    graphite
_diffrn_radiation_probe            x-ray
_diffrn_radiation_type             'Mo K\a'
_diffrn_radiation_wavelength       0.71073
_diffrn_source                     'fine-focus sealed X-ray tube'
_diffrn_source_type                'Enhance (Mo) X-ray Source'
_diffrn_standards_number           0
_reflns_Friedel_coverage           0.716
_reflns_Friedel_fraction_full      0.898
_reflns_Friedel_fraction_max       0.670
_reflns_number_gt                  2570
_reflns_number_total               2814
_reflns_special_details
;
 Reflections were merged by SHELXL according to the crystal
 class for the calculation of statistics and refinement.
 
 _reflns_Friedel_fraction is defined as the number of unique
 Friedel pairs measured divided by the number that would be
 possible theoretically, ignoring centric projections and
 systematic absences. Completness statistics refer to single and
 composite reflections containing twin component 1 only.
;
_reflns_threshold_expression       'I > 2\s(I)'
_computing_cell_refinement         'CrysAlisPro 1.171.42.92a (Rigaku OD, 2023)'
_computing_data_collection         'CrysAlisPro 1.171.42.92a (Rigaku OD, 2023)'
_computing_data_reduction          'CrysAlisPro 1.171.42.92a (Rigaku OD, 2023)'
_computing_molecular_graphics      'Olex2 1.5 (Dolomanov et al., 2009)'
_computing_publication_material    'Olex2 1.5 (Dolomanov et al., 2009)'
_computing_structure_refinement    'SHELXL 2018/3 (Sheldrick, 2015)'
_computing_structure_solution      'SHELXT 2018/2 (Sheldrick, 2018)'
_refine_diff_density_max           0.470
_refine_diff_density_min           -0.641
_refine_diff_density_rms           0.089
_refine_ls_abs_structure_details
;
 Refined as an inversion twin.
;
_refine_ls_abs_structure_Flack     0.29(3)
_refine_ls_extinction_coef         .
_refine_ls_extinction_method       none
_refine_ls_goodness_of_fit_ref     1.075
_refine_ls_hydrogen_treatment      constr
_refine_ls_matrix_type             full
_refine_ls_number_parameters       136
_refine_ls_number_reflns           2814
_refine_ls_number_restraints       52
_refine_ls_R_factor_all            0.0486
_refine_ls_R_factor_gt             0.0410
_refine_ls_restrained_S_all        1.069
_refine_ls_shift/su_max            0.000
_refine_ls_shift/su_mean           0.000
_refine_ls_structure_factor_coef   Fsqd
_refine_ls_weighting_details      
 'w=1/[\s^2^(Fo^2^)+(0.0189P)^2^+1.5121P] where P=(Fo^2^+2Fc^2^)/3'
_refine_ls_weighting_scheme        calc
_refine_ls_wR_factor_gt            0.0869
_refine_ls_wR_factor_ref           0.0941
_refine_special_details
;
 Refined as a 2-component inversion twin.
;
_olex2_refinement_description
;
1. Twinned data refinement
 Scales: 0.71(3)
 0.29(3)
2. Fixed Uiso
 At 1.2 times of:
  All C(H) groups, All N(H,H) groups
 At 1.5 times of:
  All C(H,H,H) groups
3. Restrained distances
 N3B-C4B \\sim N3B-C5B
 with sigma of 0.02
4. Restrained planarity
 C2B, O1B, N3B, C4B, C5B
 with sigma of 0.1
5. Uiso/Uaniso restraints and constraints
C2B \\sim O1B \\sim N3B \\sim C4B \\sim C5B: within 2A with sigma of 0.04 and sigma
for terminal atoms of 0.08 within 2A
O1B \\sim C5B \\sim C2B \\sim N3B \\sim C4B: within 2A with sigma of 0.02 and sigma
for terminal atoms of 0.04 within 2A
6. Rigid body (RIGU) restrains
 C2B, O1B, N3B, C4B, C5B
 with sigma for 1-2 distances of 0.004 and sigma for 1-3 distances of 0.004
7. Others
 Fixed Sof: C2B(0.5) H2B(0.5) O1B(0.5) N3B(0.5) C4B(0.5) H41B(0.5) H42B(0.5) H43B(0.5)
 C5B(0.5) C51B(0.5) C52B(0.5) C53B(0.5)
8.a Free rotating group:
 C2B(O1B,N3B,C4B,C5B)
8.b Rotating group:
 N31A(H31A,H32A)
8.c Aromatic/amide H refined with riding coordinates:
 C6A(H6A), C5A(H5A), C2A(H2A), C2B(H2B)
8.d Idealised Me refined as rotating group:
 C4B(H41B,H42B,H43B), C5B(C51B,C52B,C53B)
;
_atom_sites_solution_hydrogens     mixed
_atom_sites_solution_primary       ?
_atom_sites_solution_secondary     ?
loop_
  _atom_site_label
  _atom_site_type_symbol
  _atom_site_fract_x
  _atom_site_fract_y
  _atom_site_fract_z
  _atom_site_U_iso_or_equiv
  _atom_site_adp_type
  _atom_site_occupancy
  _atom_site_site_symmetry_order
  _atom_site_calc_flag
  _atom_site_refinement_flags_posn
  _atom_site_refinement_flags_adp
  _atom_site_refinement_flags_occupancy
  _atom_site_disorder_assembly
  _atom_site_disorder_group
 Ni1 Ni 0.500000 0.500000 0.22416(9) 0.01249(13) Uani 1 2 d S T P . .
 O2A O 0.38646(19) 0.2763(4) 0.2681(2) 0.0163(5) Uani 1 1 d . . . . .
 O1A O 0.3831(2) 0.5608(4) 0.3692(3) 0.0194(5) Uani 1 1 d . . . . .
 N1A N 0.0990(3) 0.1353(5) 0.5956(3) 0.0181(6) Uani 1 1 d . . . . .
 N31A N 0.2529(3) 0.5956(5) 0.5743(3) 0.0278(8) Uani 1 1 d . . . . .
 H31A H 0.274391 0.659704 0.506500 0.033 Uiso 1 1 d R U . . .
 H32A H 0.197769 0.660765 0.610468 0.033 Uiso 1 1 d R U . . .
 C6A C 0.1380(3) 0.0339(6) 0.4953(4) 0.0209(7) Uani 1 1 d . . . . .
 H6A H 0.110598 -0.095892 0.479039 0.025 Uiso 1 1 calc R U . . .
 C5A C 0.2161(3) 0.1152(6) 0.4170(4) 0.0213(7) Uani 1 1 d . . . . .
 H5A H 0.242176 0.041225 0.347015 0.026 Uiso 1 1 calc R U . . .
 C2A C 0.1354(3) 0.3179(5) 0.6168(3) 0.0189(7) Uani 1 1 d . . . . .
 H2A H 0.105603 0.388353 0.686375 0.023 Uiso 1 1 calc R U . . .
 C4A C 0.2578(3) 0.3046(6) 0.4384(3) 0.0188(6) Uani 1 1 d . . . . .
 C41A C 0.3456(3) 0.3853(5) 0.3552(3) 0.0170(6) Uani 1 1 d . . . . .
 C3A C 0.2161(3) 0.4127(5) 0.5413(4) 0.0195(7) Uani 1 1 d . . . . .
 C2B C 0.5431(8) -0.1327(15) 0.7503(8) 0.055(3) Uani 0.5 1 d G U P A -1
 H2B H 0.570019 -0.249655 0.710664 0.066 Uiso 0.5 1 calc R U P A -1
 O1B O 0.5558(10) -0.1199(15) 0.8640(8) 0.083(3) Uani 0.5 1 d G U P A -1
 N3B N 0.4938(10) 0.006(2) 0.6756(5) 0.0378(16) Uani 0.5 1 d DG U P A -1
 C4B C 0.4825(16) -0.022(4) 0.5412(5) 0.053(6) Uani 0.5 1 d DG U P A -1
 H41B H 0.546515 0.038613 0.498259 0.080 Uiso 0.5 1 calc R U P A -1
 H42B H 0.413104 0.040329 0.512153 0.080 Uiso 0.5 1 calc R U P A -1
 H43B H 0.480396 -0.164354 0.522340 0.080 Uiso 0.5 1 calc R U P A -1
 C5B C 0.4504(17) 0.189(2) 0.7291(13) 0.089(7) Uani 0.5 1 d DG U P A -1
 H51B H 0.370893 0.172816 0.749047 0.134 Uiso 0.5 1 calc R U P A -1
 H52B H 0.459357 0.297529 0.668462 0.134 Uiso 0.5 1 calc R U P A -1
 H53B H 0.491867 0.221225 0.805865 0.134 Uiso 0.5 1 calc R U P A -1

loop_
  _atom_site_aniso_label
  _atom_site_aniso_U_11
  _atom_site_aniso_U_22
  _atom_site_aniso_U_33
  _atom_site_aniso_U_23
  _atom_site_aniso_U_13
  _atom_site_aniso_U_12
 Ni1 0.00685(19) 0.0207(2) 0.0099(2) 0.000 0.000 -0.0004(2)
 O2A 0.0102(10) 0.0245(12) 0.0141(11) -0.0037(9) 0.0028(8) -0.0015(9)
 O1A 0.0148(11) 0.0219(12) 0.0215(13) -0.0034(11) 0.0056(10) -0.0038(10)
 N1A 0.0140(13) 0.0233(15) 0.0169(15) -0.0003(12) 0.0037(10) -0.0014(12)
 N31A 0.0304(18) 0.0246(17) 0.0284(19) -0.0066(13) 0.0158(15) -0.0059(14)
 C6A 0.0178(16) 0.0240(19) 0.0211(18) -0.0021(13) 0.0054(13) -0.0040(13)
 C5A 0.0233(18) 0.0237(17) 0.0169(17) -0.0042(14) 0.0090(14) -0.0042(14)
 C2A 0.0143(14) 0.0239(17) 0.0183(17) -0.0020(13) 0.0061(12) -0.0010(12)
 C4A 0.0146(14) 0.0248(16) 0.0170(16) -0.0025(12) 0.0047(11) -0.0029(12)
 C41A 0.0093(13) 0.0245(16) 0.0173(16) -0.0038(13) 0.0034(12) -0.0007(11)
 C3A 0.0175(16) 0.0209(17) 0.0202(17) -0.0007(13) 0.0062(12) -0.0017(12)
 C2B 0.054(7) 0.048(8) 0.063(7) 0.010(6) -0.022(6) 0.017(6)
 O1B 0.106(9) 0.079(7) 0.065(6) 0.018(6) -0.037(6) -0.024(7)
 N3B 0.028(4) 0.046(4) 0.039(3) 0.003(7) -0.007(6) 0.005(3)
 C4B 0.046(13) 0.074(12) 0.039(5) -0.009(7) -0.012(5) 0.021(10)
 C5B 0.132(16) 0.058(9) 0.077(10) -0.020(9) -0.032(14) 0.042(9)

_geom_special_details
;
 All esds (except the esd in the dihedral angle between two l.s. planes)
 are estimated using the full covariance matrix.  The cell esds are taken
 into account individually in the estimation of esds in distances, angles
 and torsion angles; correlations between esds in cell parameters are only
 used when they are defined by crystal symmetry.  An approximate (isotropic)
 treatment of cell esds is used for estimating esds involving l.s. planes.
;
loop_
  _geom_bond_atom_site_label_1
  _geom_bond_atom_site_label_2
  _geom_bond_distance
  _geom_bond_site_symmetry_2
  _geom_bond_publ_flag
 Ni1 O2A 2.081(2) 2_665 ?
 Ni1 O2A 2.081(2) . ?
 Ni1 O1A 2.123(3) 2_665 ?
 Ni1 O1A 2.123(3) . ?
 Ni1 N1A 2.028(3) 4_554 ?
 Ni1 N1A 2.028(3) 3_554 ?
 Ni1 C41A 2.439(3) 2_665 ?
 Ni1 C41A 2.439(3) . ?
 O2A C41A 1.281(4) . ?
 O1A C41A 1.274(4) . ?
 N1A C6A 1.351(5) . ?
 N1A C2A 1.324(5) . ?
 N31A H31A 0.8804 . ?
 N31A H32A 0.8805 . ?
 N31A C3A 1.354(5) . ?
 C6A H6A 0.9500 . ?
 C6A C5A 1.367(5) . ?
 C5A H5A 0.9500 . ?
 C5A C4A 1.389(5) . ?
 C2A H2A 0.9500 . ?
 C2A C3A 1.409(5) . ?
 C4A C41A 1.477(5) . ?
 C4A C3A 1.408(5) . ?
 C2B H2B 0.9500 . ?
 C2B O1B 1.2247 . ?
 C2B N3B 1.3635 . ?
 N3B C4B 1.4520 . ?
 N3B C5B 1.4552 . ?
 C4B H41B 0.9800 . ?
 C4B H42B 0.9800 . ?
 C4B H43B 0.9800 . ?
 C5B H51B 0.9800 . ?
 C5B H52B 0.9800 . ?
 C5B H53B 0.9800 . ?

loop_
  _geom_angle_atom_site_label_1
  _geom_angle_atom_site_label_2
  _geom_angle_atom_site_label_3
  _geom_angle
  _geom_angle_site_symmetry_1
  _geom_angle_site_symmetry_3
  _geom_angle_publ_flag
 O2A Ni1 O2A 154.00(14) 2_665 . ?
 O2A Ni1 O1A 63.10(10) . . ?
 O2A Ni1 O1A 97.16(10) . 2_665 ?
 O2A Ni1 O1A 97.16(10) 2_665 . ?
 O2A Ni1 O1A 63.10(10) 2_665 2_665 ?
 O2A Ni1 C41A 126.40(11) . 2_665 ?
 O2A Ni1 C41A 31.68(10) . . ?
 O2A Ni1 C41A 126.40(11) 2_665 . ?
 O2A Ni1 C41A 31.68(10) 2_665 2_665 ?
 O1A Ni1 O1A 86.49(16) . 2_665 ?
 O1A Ni1 C41A 91.08(12) . 2_665 ?
 O1A Ni1 C41A 31.45(11) 2_665 2_665 ?
 O1A Ni1 C41A 31.45(11) . . ?
 O1A Ni1 C41A 91.08(12) 2_665 . ?
 N1A Ni1 O2A 95.62(11) 4_554 2_665 ?
 N1A Ni1 O2A 101.91(11) 3_554 2_665 ?
 N1A Ni1 O2A 101.91(11) 4_554 . ?
 N1A Ni1 O2A 95.62(11) 3_554 . ?
 N1A Ni1 O1A 91.28(11) 4_554 2_665 ?
 N1A Ni1 O1A 164.34(11) 4_554 . ?
 N1A Ni1 O1A 164.34(11) 3_554 2_665 ?
 N1A Ni1 O1A 91.28(11) 3_554 . ?
 N1A Ni1 N1A 94.91(18) 3_554 4_554 ?
 N1A Ni1 C41A 95.08(13) 3_554 . ?
 N1A Ni1 C41A 133.30(12) 3_554 2_665 ?
 N1A Ni1 C41A 95.09(13) 4_554 2_665 ?
 N1A Ni1 C41A 133.30(12) 4_554 . ?
 C41A Ni1 C41A 110.13(17) 2_665 . ?
 C41A O2A Ni1 89.8(2) . . ?
 C41A O1A Ni1 88.1(2) . . ?
 C6A N1A Ni1 120.5(3) . 3_545 ?
 C2A N1A Ni1 119.6(3) . 3_545 ?
 C2A N1A C6A 119.5(3) . . ?
 H31A N31A H32A 109.4 . . ?
 C3A N31A H31A 109.2 . . ?
 C3A N31A H32A 109.0 . . ?
 N1A C6A H6A 119.5 . . ?
 N1A C6A C5A 121.0(4) . . ?
 C5A C6A H6A 119.5 . . ?
 C6A C5A H5A 119.6 . . ?
 C6A C5A C4A 120.8(3) . . ?
 C4A C5A H5A 119.6 . . ?
 N1A C2A H2A 118.4 . . ?
 N1A C2A C3A 123.3(3) . . ?
 C3A C2A H2A 118.4 . . ?
 C5A C4A C41A 119.6(3) . . ?
 C5A C4A C3A 118.5(3) . . ?
 C3A C4A C41A 121.9(3) . . ?
 O2A C41A Ni1 58.56(17) . . ?
 O2A C41A C4A 119.6(3) . . ?
 O1A C41A Ni1 60.44(18) . . ?
 O1A C41A O2A 118.9(3) . . ?
 O1A C41A C4A 121.4(3) . . ?
 C4A C41A Ni1 175.7(3) . . ?
 N31A C3A C2A 119.1(3) . . ?
 N31A C3A C4A 123.9(3) . . ?
 C4A C3A C2A 116.9(3) . . ?
 O1B C2B H2B 117.2 . . ?
 O1B C2B N3B 125.7 . . ?
 N3B C2B H2B 117.2 . . ?
 C2B N3B C4B 121.7 . . ?
 C2B N3B C5B 120.5 . . ?
 C4B N3B C5B 117.8 . . ?
 N3B C4B H41B 109.5 . . ?
 N3B C4B H42B 109.5 . . ?
 N3B C4B H43B 109.5 . . ?
 H41B C4B H42B 109.5 . . ?
 H41B C4B H43B 109.5 . . ?
 H42B C4B H43B 109.5 . . ?
 N3B C5B H51B 109.5 . . ?
 N3B C5B H52B 109.5 . . ?
 N3B C5B H53B 109.5 . . ?
 C51B C5B H52B 109.5 . . ?
 C51B C5B H53B 109.5 . . ?
 C52B C5B H53B 109.5 . . ?

loop_
  _geom_hbond_atom_site_label_D
  _geom_hbond_atom_site_label_H
  _geom_hbond_atom_site_label_A
  _geom_hbond_distance_DH
  _geom_hbond_distance_HA
  _geom_hbond_distance_DA
  _geom_hbond_angle_DHA
  _geom_hbond_site_symmetry_A
  _geom_hbond_publ_flag
 N31A H31A O1A 0.88 2.07 2.693(4) 127.3 . yes
 N31A H32A O2A 0.88 2.11 2.919(4) 152.9 3 yes

loop_
  _geom_torsion_atom_site_label_1
  _geom_torsion_atom_site_label_2
  _geom_torsion_atom_site_label_3
  _geom_torsion_atom_site_label_4
  _geom_torsion
  _geom_torsion_site_symmetry_1
  _geom_torsion_site_symmetry_2
  _geom_torsion_site_symmetry_3
  _geom_torsion_site_symmetry_4
  _geom_torsion_publ_flag
 Ni1 O2A C41A O1A 3.4(3) . . . . ?
 Ni1 O2A C41A C4A -175.5(3) . . . . ?
 Ni1 O1A C41A O2A -3.3(3) . . . . ?
 Ni1 O1A C41A C4A 175.5(3) . . . . ?
 Ni1 N1A C6A C5A -171.4(3) 3_545 . . . ?
 Ni1 N1A C2A C3A 171.2(3) 3_545 . . . ?
 N1A C6A C5A C4A 0.1(6) . . . . ?
 N1A C2A C3A N31A -176.4(4) . . . . ?
 N1A C2A C3A C4A 0.5(6) . . . . ?
 C6A N1A C2A C3A -1.7(6) . . . . ?
 C6A C5A C4A C41A 177.5(4) . . . . ?
 C6A C5A C4A C3A -1.2(6) . . . . ?
 C5A C4A C41A O2A -3.6(5) . . . . ?
 C5A C4A C41A O1A 177.6(4) . . . . ?
 C5A C4A C3A N31A 177.7(4) . . . . ?
 C5A C4A C3A C2A 0.9(5) . . . . ?
 C2A N1A C6A C5A 1.4(6) . . . . ?
 C41A C4A C3A N31A -1.0(6) . . . . ?
 C41A C4A C3A C2A -177.8(3) . . . . ?
 C3A C4A C41A O2A 175.1(3) . . . . ?
 C3A C4A C41A O1A -3.7(5) . . . . ?
 O1B C2B N3B C4B 180.0 . . . . ?
 O1B C2B N3B C5B 0.0 . . . . ?

_shelx_res_file
;
TITL mo_niso_a.res in Pn New: PnN31A
    mo_niso_pl.res
    created by SHELXL-2018/3 at 16:28:43 on 11-Jul-2023
CELL 0.71073 11.9437 6.7402 10.661 90 90 90
ZERR 2 0.0019 0.0014 0.0018 0 0 0
LATT -1
SYMM -X,-Y,+Z
SYMM 0.5-X,0.5+Y,0.5+Z
SYMM 0.5+X,0.5-Y,0.5+Z
SFAC C H N Ni O
UNIT 30 34 10 2 10
EQIV $1 0.5-X,0.5+Y,0.5+Z
SADI N3B C4B N3B C5B
FLAT C2B O1B N3B C4B C5B
SIMU C2B O1B N3B C4B C5B
RIGU C2B O1B N3B C4B C5B
SIMU 0.02 0.04 2 O1B C5B C2B N3B C4B

L.S. 50
PLAN  5
SIZE 0.1 0.12 0.18
TEMP -173
CONF
HTAB N31A O2A_$1
HTAB N31A O1A
MORE -1
BOND $H
fmap 2
acta
TWIN -1 0 0 0 -1 0 0 0 -1 2
REM <olex2.extras>
REM <HklSrc "%.\\mo_NiSO.hkl">
REM </olex2.extras>

WGHT    0.018900    1.512100
BASF   0.29190
FVAR       1.53546
NI1   4    0.500000    0.500000    0.224161    10.50000    0.00685    0.02072 =
         0.00991    0.00000    0.00000   -0.00039
O2A    5    0.386455    0.276290    0.268077    11.00000    0.01020    0.02451 =
         0.01412   -0.00365    0.00284   -0.00154
O1A    5    0.383150    0.560763    0.369228    11.00000    0.01485    0.02195 =
         0.02151   -0.00335    0.00557   -0.00384
N1A    3    0.099041    0.135332    0.595560    11.00000    0.01397    0.02333 =
         0.01695   -0.00025    0.00367   -0.00143
N31A    3    0.252879    0.595565    0.574279    11.00000    0.03043    0.02460 =
         0.02840   -0.00662    0.01581   -0.00588
AFIX   7
H31A   2    0.274391    0.659704    0.506500    11.00000   -1.20000
H32A   2    0.197769    0.660765    0.610468    11.00000   -1.20000
AFIX   0
C6A    1    0.137955    0.033923    0.495328    11.00000    0.01776    0.02402 =
         0.02105   -0.00208    0.00540   -0.00402
AFIX  43
H6A    2    0.110598   -0.095892    0.479039    11.00000   -1.20000
AFIX   0
C5A    1    0.216069    0.115195    0.417000    11.00000    0.02325    0.02369 =
         0.01692   -0.00416    0.00901   -0.00424
AFIX  43
H5A    2    0.242176    0.041225    0.347015    11.00000   -1.20000
AFIX   0
C2A    1    0.135410    0.317867    0.616809    11.00000    0.01433    0.02395 =
         0.01835   -0.00200    0.00611   -0.00103
AFIX  43
H2A    2    0.105603    0.388353    0.686375    11.00000   -1.20000
AFIX   0
C4A    1    0.257787    0.304603    0.438413    11.00000    0.01462    0.02478 =
         0.01702   -0.00252    0.00465   -0.00292
C41A    1    0.345567    0.385330    0.355190    11.00000    0.00925    0.02450 =
         0.01725   -0.00383    0.00340   -0.00069
C3A    1    0.216134    0.412725    0.541341    11.00000    0.01747    0.02093 =
         0.02021   -0.00065    0.00620   -0.00169

PART -1
AFIX   6
C2B    1    0.543150   -0.132718    0.750269    10.50000    0.05419    0.04842 =
         0.06286    0.01046   -0.02164    0.01685
AFIX  43
H2B    2    0.570019   -0.249655    0.710664    10.50000   -1.20000
AFIX   5
O1B    5    0.555839   -0.119928    0.863979    10.50000    0.10553    0.07926 =
         0.06455    0.01755   -0.03717   -0.02391
N3B    3    0.493810    0.006282    0.675579    10.50000    0.02818    0.04637 =
         0.03885    0.00268   -0.00745    0.00491
C4B    1    0.482540   -0.022088    0.541159    10.50000    0.04605    0.07442 =
         0.03899   -0.00901   -0.01180    0.02119
AFIX 137
H41B   2    0.546515    0.038613    0.498259    10.50000   -1.50000
H42B   2    0.413104    0.040329    0.512153    10.50000   -1.50000
H43B   2    0.480396   -0.164354    0.522340    10.50000   -1.50000
AFIX   5
C5B    1    0.450441    0.189414    0.729108    10.50000    0.13232    0.05797 =
         0.07724   -0.02041   -0.03190    0.04153
AFIX 137
C51B   2    0.370893    0.172816    0.749047    10.50000   -1.50000
C52B   2    0.459357    0.297529    0.668462    10.50000   -1.50000
C53B   2    0.491867    0.221225    0.805865    10.50000   -1.50000
AFIX   0
HKLF 4 1 0 -1 0 -1 0 0 0 0 -1


REM  mo_niso_a.res in Pn New: PnN31A
REM wR2 = 0.0941, GooF = S = 1.075, Restrained GooF = 1.069 for all data
REM R1 = 0.0410 for 2570 Fo > 4sig(Fo) and 0.0486 for all 2814 data
REM 136 parameters refined using 52 restraints

END

WGHT      0.0189      1.5121

REM Highest difference peak  0.470,  deepest hole -0.641,  1-sigma level  0.089
Q1    1   0.0445  0.1159  0.6608  11.00000  0.05    0.47
Q2    1   0.4508  0.6201  0.2891  11.00000  0.05    0.42
Q3    1  -0.0013  0.2972  0.5943  11.00000  0.05    0.38
Q4    1   0.3836  0.2105  0.7755  11.00000  0.05    0.37
Q5    1   0.5058  0.2113  0.3573  11.00000  0.05    0.36
;
_shelx_res_checksum                89412
_shelx_hkl_file
;
   0   0   3    1.17    0.66
   0   0   4  264.18   10.79
   0   0   5    1.32    1.59
   0   0   6 9970.69   77.73
   0   0   7    0.73    1.76
   0   0   7    0.61    1.10
   0   0   8 3874.81   52.84
   0   0   8 3971.79   51.49
   0   0   9    3.92    2.78
   0   0   9    1.99    1.37
   0   0  10  516.35   23.83
   0   0  11   -2.83    3.88
   0   0  12   91.97   11.80
   0   0  13   -1.15    4.64
   0   0  14  764.73   39.08
   0   1   0    0.52    0.54
   0  -1   0   11.00    2.80
   0   1  -2   24.88    3.20
   0  -1   2   21.71    3.72
   0  -1   3  639.91   18.64
   0  -1   3  665.20   21.12
   0  -1   4  106.85    8.23
   0  -1   4   97.86    8.83
   0  -1   5  751.85   22.86
   0  -1   5  690.51   25.53
   0  -1   6   91.55    8.71
   0  -1   6   90.91   10.00
   0  -1   7 5234.70   70.76
   0  -1   7 5398.31   77.04
   0  -1   8   17.12    4.96
   0  -1   8   14.48    4.51
   0   1   9 2350.70   33.66
   0  -1   9 2470.28   56.19
   0   1  10   14.26    3.34
   0  -1  10   20.12    6.89
   0  -1  10   17.55    4.84
   0  -1  11  189.57   18.44
   0   1  11  205.27   13.93
   0  -1  11  213.89   13.97
   0  -1  12   34.65    8.69
   0   1  12   37.21    7.64
   0  -1  12   24.08    3.95
   0  -1  12   32.21    4.70
   0  -1  13  555.81   32.85
   0   1  13  551.60   27.62
   0   1  14   26.88    6.52
   0  -1  14   35.40   11.00
   0   2   0  942.68   25.23
   0  -2   0  998.07   24.27
   0  -2   0  970.47   26.73
   0   2   0  996.11   26.45
   0   2  -1   27.32    4.55
   0  -2   1   27.51    5.01
   0   2   1   23.34    3.96
   0  -2  -1   21.29    4.48
   0   2  -1   27.73    5.24
   0   2   1   26.04    4.32
   0  -2   1   29.50    5.21
   0   2  -3  213.29   12.56
   0  -2   3  215.23   13.71
   0  -2   3  226.49   15.28
   0   2   3  197.80    8.49
   0  -2   4 6587.22   79.48
   0  -2   4 6463.06   87.67
   0  -2   5   62.89    8.58
   0  -2   5   77.21   10.35
   0  -2   6 2410.94   53.66
   0  -2   6 2431.79   58.85
   0  -2   7  116.67   12.85
   0  -2   7  112.75   13.26
   0  -2   8 3631.93   73.70
   0  -2   8 3663.30   76.59
   0  -2   9   33.49    7.30
   0  -2   9   39.74    8.44
   0  -2  10  601.95   33.47
   0  -2  10  623.55   31.64
   0  -2  11  155.39   18.76
   0   2  11  105.56    8.02
   0  -2  11  139.42   15.64
   0   2  12  779.39   24.80
   0  -2  12 1070.74   39.90
   0  -2  13   30.58   11.07
   0   2  13   18.71    5.71
   0  -2  13   35.11    7.48
   0  -2  13   26.91    6.02
   0  -2  14  508.30   38.70
   0   2  14  302.69   18.76
   0   3   0   18.88    5.01
   0  -3   0   34.00    5.65
   0   3   0   18.75    5.11
   0  -3   0   22.54    5.06
   0  -3   1 4500.23   68.27
   0   3  -1 4617.05   72.68
   0  -3   2  683.89   28.27
   0   3  -2  653.63   26.69
   0   3   2  689.91   21.53
   0   3   2  611.45   23.43
   0  -3  -2  664.89   23.92
   0   3  -4   76.91    9.50
   0  -3   4   75.77   10.54
   0  -3  -4   90.27    6.10
   0   3   4   89.07    7.37
   0  -3   4   87.57   11.80
   0   3  -5 4176.01   62.97
   0  -3   5 3931.19   76.25
   0  -3   5 3986.13   80.53
   0   3  -6  130.90    9.21
   0   3  -6  128.72    9.07
   0  -3   6  112.92   14.42
   0  -3   6  113.01   15.42
   0  -3   7 1246.96   47.52
   0  -3   7 1132.84   46.81
   0  -3   8  267.42   23.02
   0  -3   8  262.16   23.13
   0  -3   9 2087.32   65.93
   0  -3   9 2093.87   65.77
   0  -3  10   19.32    8.30
   0  -3  10   18.99    6.13
   0  -3  11 3011.17   79.62
   0  -3  12   26.68    8.06
   0  -3  12   29.70    8.37
   0  -3  13  875.92   52.38
   0  -3  13 1143.56   47.43
   0  -3  14   -1.29   10.97
   0  -3  14    7.26    5.37
   0  -3  14   -2.94    6.79
   0  -4   0 1014.53   34.70
   0   4   0  867.83   35.56
   0  -4   0  940.24   36.38
   0   4   0  820.89   35.86
   0   4  -1   94.93   13.45
   0   4   1  115.74   11.89
   0  -4   1  113.52   12.63
   0  -4  -1  126.51   11.61
   0  -4  -1  128.64   12.59
   0  -4   1  108.10   12.98
   0   4   1   98.11   12.41
   0   4  -1   97.18   12.83
   0  -4  -2 2723.13   47.66
   0   4   2 2688.27   52.25
   0  -4   2 2768.04   63.90
   0   4  -2 2542.28   59.66
   0  -4   2 2673.07   65.76
   0   4   2 2641.08   55.53
   0   4  -2 2462.36   63.50
   0  -4  -2 2581.38   54.72
   0   4   3   26.68    4.92
   0   4  -3   15.06    6.38
   0  -4   3   17.65    6.51
   0   4   3   14.51    4.02
   0   4  -3   21.33    7.16
   0  -4  -3   20.60    5.13
   0  -4   3   15.77    6.06
   0  -4   4 9274.54  128.23
   0   4  -4 9383.96  133.17
   0   4   5   38.98    5.12
   0  -4   5   33.91    8.06
   0   4  -5   34.22    7.23
   0  -4  -5   29.09    4.11
   0  -4   5   26.82    7.66
   0   4  -6 5828.81   85.01
   0   4   6 5550.08   54.05
   0  -4   6 5728.05  108.37
   0  -4   6 5810.25  112.05
   0   4  -7   41.19    6.18
   0   4  -7   34.93    6.12
   0  -4   7   25.24    7.80
   0  -4   7   36.99    9.87
   0  -4   8 3765.26   93.67
   0  -4   8 3662.94   94.83
   0  -4   9    3.96    6.02
   0  -4  10 3140.02   92.38
   0  -4  10 3219.30   92.13
   0  -4  11    8.18   10.10
   0  -4  11    4.85    5.55
   0  -4  12 1744.42   73.41
   0  -4  13   27.69   14.05
   0  -4  13   24.77   10.85
   0  -4  14  646.31   39.91
   0  -4  15    0.90    9.19
   0  -4  15    3.94    6.57
   0   5   0   77.36   13.42
   0  -5   0  127.86   13.93
   0   5   0  115.42   14.59
   0  -5   0   87.23   13.43
   0   5  -1  498.98   28.72
   0  -5  -1  514.37   26.69
   0  -5   1  499.90   28.40
   0   5   1  533.49   27.96
   0  -5  -1  423.56   27.98
   0   5  -1  435.27   29.56
   0  -5   1  486.92   30.66
   0   5   1  487.86   29.00
   0   5   2  273.39   19.38
   0   5  -2  302.19   23.02
   0  -5   2  248.98   22.27
   0  -5  -2  293.36   18.74
   0  -5   2  237.06   22.38
   0   5  -2  256.48   23.12
   0   5   2  259.94   21.02
   0  -5  -2  268.01   21.59
   0   5  -3 6023.21  106.10
   0  -5   3 6200.27  110.32
   0  -5   3 6290.62  117.26
   0   5  -3 6236.26  116.68
   0   5  -4    6.67    5.65
   0  -5   4    8.20    5.29
   0   5   4    7.65    2.94
   0   5  -4    6.24    5.09
   0  -5   4    9.18    7.28
   0  -5  -4    8.65    3.38
   0   5   4    5.01    2.95
   0   5  -5 3498.26   79.81
   0   5   5 3248.44   59.26
   0  -5   5 3448.30   87.17
   0  -5  -5 3298.20   57.80
   0  -5   5 3429.05   90.99
   0   5  -5 3433.41   93.58
   0   5   5 3259.02   63.03
   0   5   6   11.59    4.11
   0  -5   6   19.89    8.28
   0   5  -6    9.89    5.26
   0  -5  -6   11.25    2.82
   0  -5  -6   12.56    3.25
   0  -5   6    8.82    3.50
   0   5  -7 2824.14   65.83
   0   5   7 2959.46   50.94
   0  -5   7 2868.27   85.45
   0  -5   7 2827.94   87.45
   0   5  -8  145.19   12.46
   0   5  -8  153.41   12.65
   0   5   8  158.73   11.20
   0  -5   8  134.07   19.82
   0  -5   8  141.07   21.02
   0   5   9 1927.13   37.92
   0  -5   9 2015.12   76.68
   0  -5   9 1897.82   74.99
   0  -5  10   51.12   13.69
   0   5  10   56.90    6.33
   0  -5  10   49.72   13.61
   0   5  11 2696.85   42.71
   0  -5  11 2662.57   93.61
   0   5  12   20.89    4.47
   0  -5  12   14.40   11.81
   0  -5  12   23.11   10.56
   0  -5  13 1050.76   58.49
   0  -5  14  -16.88   19.24
   0  -5  14   -4.67    9.93
   0  -6   0  151.40   16.79
   0   6   0  127.46   17.59
   0  -6   0  148.54   19.15
   0   6   0  148.44   18.85
   0   6   1   12.52    5.15
   0  -6  -1   10.79    5.43
   0  -6   1   12.18    5.83
   0   6   1   11.78    5.91
   0   6  -1    9.78    5.34
   0  -6  -1   11.30    6.88
   0  -6   1    6.14    2.82
   0   6  -2 5617.47  107.76
   0  -6  -2 5843.49   94.06
   0   6   2 5097.44   97.50
   0  -6   2 5711.34  111.08
   0  -6  -2 5690.99  104.37
   0  -6   2 5508.49  116.51
   0   6   2 5096.56  102.62
   0   6  -2 5388.37  115.39
   0   6  -3   28.45    8.52
   0   6   3   38.99    7.78
   0  -6   3   34.80   10.11
   0   6   3   23.00    8.10
   0   6  -3   36.07    9.93
   0  -6  -3   24.80    7.44
   0  -6   3   24.49    7.58
   0   6   4 3999.49   79.19
   0   6  -4 4247.58   98.27
   0  -6   4 4170.06  102.62
   0  -6   4 4165.05  106.01
   0   6  -4 4199.26  107.79
   0   6   4 4020.75   82.55
   0  -6  -4 4214.58   82.30
   0   6  -5    4.86    4.18
   0  -6   5   15.94    5.92
   0   6   5   16.70    5.57
   0   6   5    6.65    3.46
   0   6  -5    8.88    5.61
   0  -6   5   12.44    7.40
   0  -6   6 3170.21   93.10
   0   6  -6 2834.30   78.51
   0   6   6 2941.44   64.31
   0  -6  -6 2699.57   53.95
   0  -6   6 3107.84   95.92
   0   6  -6 3093.05   97.26
   0  -6   7   27.79   10.28
   0   6   7   20.10    5.37
   0   6  -8 1903.59   56.48
   0   6   8 1723.62   45.33
   0  -6   8 1837.30   75.11
   0  -6   8 1711.02   77.33
   0   6  -9   36.59    6.48
   0   6  -9   33.33    5.73
   0   6   9   42.50    7.66
   0  -6   9   20.25   10.58
   0  -6   9   27.45    8.86
   0   6  10 1521.86   41.27
   0  -6  10 1496.19   73.36
   0   6  11   63.47    8.91
   0  -6  11   45.99   16.29
   0  -6  11   74.28   17.91
   0   6  12  965.47   31.41
   0  -6  12  955.41   61.11
   0   6  13    2.40    2.55
   0  -6  13   -1.09   13.25
   0  -6  13   12.08   11.51
   0  -6  14  189.34   26.40
   0   7   0   21.22    8.14
   0  -7   0   33.35    9.71
   0  -7   0   20.44    8.49
   0   7   1 6918.21  125.89
   0  -7   1 7151.51  131.42
   0   7  -1 6624.56  124.85
   0   7   1 7010.99  129.30
   0  -7   1 7010.35  138.30
   0  -7  -1 7010.74  132.61
   0   7  -1 7163.09  137.31
   0  -7  -2    6.35    4.04
   0  -7   2   11.24    5.84
   0   7   2    5.58    4.26
   0   7  -2    3.36    4.14
   0  -7  -2    5.77    5.22
   0   7  -2    0.84    3.56
   0  -7   2   -0.19    3.26
   0   7   2    2.09    3.13
   0   7  -3 1747.09   67.51
   0   7   3 1663.49   60.20
   0   7  -3 1697.16   71.70
   0  -7   3 1618.91   69.71
   0  -7   4   32.52   10.34
   0   7   4   32.68    8.88
   0   7  -4   27.72    8.19
   0  -7  -4   31.26    9.27
   0   7   4   32.71    8.29
   0   7  -4   36.94   10.33
   0  -7   4   33.08   11.44
   0   7   5 1889.23   58.87
   0  -7   5 1772.65   74.31
   0   7  -5 1802.44   68.85
   0  -7   5 1864.22   77.62
   0  -7  -5 1816.29   57.53
   0   7   5 1817.07   60.91
   0   7  -5 1763.69   77.29
   0   7  -6   -3.08    5.84
   0  -7   6   -2.52    7.19
   0   7   6   -3.64    5.10
   0  -7   6    5.68    6.50
   0   7  -6    7.47    9.82
   0  -7  -6    1.73    3.73
   0   7   7 3507.17   77.31
   0   7  -7 3583.19  116.19
   0  -7   7 3439.64  107.81
   0   7  -7 3636.28   94.36
   0  -7  -7 3383.14   59.39
   0  -7   7 3419.04  109.88
   0   7  -8   21.34    6.48
   0   7   8   22.82    5.82
   0  -7   8   14.82    8.91
   0  -7   8   18.58   10.14
   0   7  -9 3121.74   74.38
   0   7  -9 3100.95   74.21
   0   7   9 3046.41   69.95
   0  -7  10   -2.40    7.93
   0   7  10    9.68    6.30
   0  -7  10   11.30   11.21
   0   7  11  217.38   19.13
   0  -7  11  237.82   32.72
   0  -7  12   10.98   13.15
   0   7  12   25.41    7.48
   0  -7  12   11.29   11.84
   0   7  13  523.98   24.14
   0  -7  13  517.61   47.43
   0  -7  14   23.48   14.56
   0  -8  -1  340.51   28.79
   0   8  -1  214.88   28.63
   0   8   1  341.04   30.72
   0   8  -1  327.35   32.14
   0   8   1  322.20   29.93
   0  -8   1  329.84   32.57
   0   8  -2 1738.80   70.96
   0  -8  -2 1809.30   62.68
   0   8   2 1717.78   66.77
   0  -8   2 1877.26   73.33
   0  -8  -2 1735.64   69.89
   0   8   2 1763.33   68.79
   0  -8   2 1817.00   76.57
   0   8  -3    2.20    7.70
   0   8   3    3.30    5.22
   0  -8   3    4.36    7.74
   0  -8  -3    9.29    6.04
   0   8   3    0.15    4.63
   0   8  -3    8.56    6.46
   0  -8   3    6.97    7.65
   0   8  -4 1127.42   57.93
   0  -8   4 1105.91   58.53
   0   8   4 1115.04   51.27
   0   8   4  975.28   51.25
   0   8  -4 1124.93   63.99
   0  -8  -4 1168.89   53.25
   0  -8   4 1092.35   62.51
   0   8  -5   30.12   10.14
   0   8   5   25.67    8.41
   0  -8   5   24.05    8.74
   0  -8  -5   25.26    9.28
   0  -8   5   24.07   10.80
   0   8   5   22.50    6.64
   0   8  -5   18.45    8.96
   0  -8   6 1743.37   78.49
   0   8  -6 1857.84   74.82
   0   8   6 1673.58   63.13
   0  -8   6 1722.13   81.01
   0  -8  -6 1856.27   62.25
   0   8  -6 1920.23   87.28
   0   8  -7   11.13    7.79
   0   8  -7    4.48    6.63
   0  -8   7    7.93    9.51
   0   8   7    5.57    5.95
   0  -8   7   13.67   11.35
   0  -8  -7   10.58    5.03
   0   8   8 1643.80   60.33
   0  -8   8 1634.91   80.54
   0   8  -8 1728.25   69.73
   0  -8   8 1643.11   84.15
   0   8  -9   25.69    8.60
   0   8   9   29.48    8.71
   0  -8   9   18.93    9.71
   0  -8   9   24.17   11.77
   0   8 -10  203.88   18.15
   0   8 -10  197.98   18.11
   0   8  10  162.14   19.35
   0  -8  10  142.34   30.19
   0  -8  11   -0.44    8.58
   0  -8  12  123.50   23.12
   0  -8  13    5.91   12.27
   0  -9   0   24.43    9.63
   0   9   0    7.33    6.23
   0   9   0   16.19    8.52
   0  -9   0   15.92    9.72
   0  -9   1 5879.92  136.68
   0   9  -1 5475.44  130.01
   0   9   1 5346.43  130.59
   0  -9  -1 5747.25  128.24
   0   9   1 5637.94  137.22
   0   9  -1 5505.99  142.42
   0  -9  -1 5761.43  137.12
   0   9   2   33.69   12.69
   0  -9   2   36.36   12.56
   0   9  -2   35.88   11.51
   0  -9  -2   39.24   10.90
   0  -9   2   30.58   10.70
   0   9   2   36.05   12.56
   0   9  -2   44.54   13.55
   0  -9  -2   46.51   13.20
   0   9   3 1545.09   66.64
   0  -9   3 1644.62   75.28
   0   9  -3 1594.83   73.66
   0   9  -3 1719.34   81.40
   0  -9   3 1589.20   77.86
   0  -9  -3 1704.30   71.60
   0   9   3 1506.75   68.99
   0   9  -4   -1.84    6.70
   0   9   4    4.43    5.03
   0  -9   4    7.07    4.74
   0  -9  -4    3.83    5.25
   0  -9   4    5.97    5.79
   0   9   4   -0.17    3.61
   0   9   5 2237.49   78.28
   0  -9   5 2255.17   93.00
   0   9  -5 2197.48   90.01
   0   9   5 2044.65   76.65
   0   9  -5 2297.76  100.97
   0  -9  -5 2068.46   77.32
   0  -9   5 2132.64   93.61
   0   9  -6    2.68    5.69
   0   9   6   10.40    7.78
   0  -9   6    6.51    7.49
   0   9  -6    8.12   11.23
   0  -9   6    5.08    7.63
   0  -9  -6   -1.41    4.30
   0   9  -7 2405.60   89.55
   0   9   7 2258.62   77.19
   0  -9   7 2267.97  101.54
   0   9   8   23.39    8.11
   0   9  -8   29.00   12.58
   0  -9  -8   17.82    5.56
   0  -9   8   19.16   13.81
   0   9   9  714.37   45.41
   0  -9   9  684.33   59.54
   0  -9   9  692.94   61.36
   0   9 -10   15.26    7.65
   0   9 -10   23.45    7.65
   0   9  10   20.15    8.87
   0  -9  10   10.58    8.84
   0   9 -11  209.77   13.49
   0   9 -11  247.23   14.39
   0   9  12    7.16    8.93
   0  -9  12    6.60   14.56
   0   9  13  581.08   35.63
   0 -10   0 1588.45   76.31
   0  10   0 1746.14   78.39
   0 -10   0 1818.96   86.05
   0  10   0 1909.60   86.23
   0 -10  -1   21.54   10.44
   0  10   1   16.34    8.81
   0 -10   1   18.15    7.73
   0  10  -1   23.30    9.03
   0 -10   1   21.86   12.75
   0  10  -1   17.73   11.68
   0  10   1   20.09   11.94
   0 -10  -1   14.19    8.15
   0 -10   2 2864.31  102.91
   0  10  -2 2960.29  106.11
   0  10   2 3045.61  100.80
   0  10   2 3014.31  105.07
   0 -10  -2 3139.47  107.75
   0 -10   2 2989.05  111.94
   0  10  -2 3037.33  112.49
   0  10  -3    9.56    4.46
   0 -10   3   10.92    6.51
   0  10   3    8.57    5.11
   0 -10  -3   10.63    7.55
   0  10   3   11.92    7.41
   0  10  -3   10.36    9.64
   0  10   4 1451.05   71.82
   0  10  -4 1630.40   78.64
   0 -10   4 1327.91   77.37
   0  10  -4 1408.06   84.24
   0  10   4 1340.38   68.73
   0 -10   4 1467.62   82.16
   0 -10  -4 1578.94   74.84
   0  10  -5   10.64    9.77
   0 -10   5    9.51   10.02
   0  10   5    5.58    4.10
   0  10  -5   23.39   10.98
   0 -10  -5   13.37    7.90
   0 -10   5   11.55   10.02
   0  10   6 1781.32   75.26
   0  10  -6 1876.87   84.68
   0 -10   6 1741.06   93.08
   0 -10  -6 1840.39   73.70
   0  10  -7   44.71   14.89
   0 -10   7   26.34   14.58
   0  10   7   56.99   13.58
   0 -10  -7   51.94    9.36
   0 -10   7   54.93   18.20
   0 -10   8   86.91   19.75
   0  10   8  142.93   25.45
   0  10  -8  263.24   31.34
   0 -10  -8  240.92   22.21
   0 -10   8  205.49   32.81
   0  10  -9    1.14    7.71
   0  10   9    2.99    5.43
   0 -10   9   17.50   13.19
   0  10 -10  442.54   38.07
   0  10  10  514.59   37.96
   0 -10  10  531.76   54.66
   0  10 -11    7.37    7.48
   0  10 -11   15.59    7.43
   0  10  11   16.68    9.41
   0 -10  11   -0.20   15.46
   0  10  12  452.99   35.29
   0  11   0   59.08   15.60
   0 -11   0   42.31   14.37
   0 -11   0   61.48   18.22
   0  11   0   56.90   18.44
   0  11   1 1090.54   65.62
   0  11  -1 1202.49   71.94
   0 -11   1 1303.89   71.99
   0 -11  -1 1377.51   70.32
   0  11   1 1198.24   72.10
   0 -11   1 1258.43   75.34
   0 -11  -1 1214.07   72.35
   0  11  -1 1169.57   74.18
   0 -11   2   43.56   17.02
   0 -11  -2   32.35   11.86
   0  11  -2   46.19   16.63
   0  11   2   37.21   13.77
   0  11   2   43.48   13.58
   0 -11  -2   51.36   14.83
   0 -11   2   41.54   16.58
   0  11  -2   41.59   15.87
   0  11  -3 1978.50   91.19
   0 -11   3 2019.73   95.72
   0  11   3 1874.85   85.33
   0 -11   3 1985.61   97.88
   0  11   3 1941.92   87.65
   0  11  -3 1931.10   98.92
   0 -11  -3 1917.05   87.94
   0  11  -4   19.30   11.29
   0  11   4   12.74    9.15
   0  11   4   13.05    8.49
   0 -11   4   14.02    7.62
   0  11  -4   14.76   10.62
   0 -11   4   10.31    8.75
   0 -11   5 1145.51   72.48
   0  11  -5 1077.45   70.79
   0  11   5 1134.86   64.25
   0 -11   5 1031.09   74.98
   0 -11  -5 1280.61   68.50
   0  11  -5 1246.67   82.64
   0 -11   6   24.42   14.01
   0  11   6   33.07   13.61
   0  11  -6   15.69   15.46
   0 -11  -6   22.29   11.59
   0  11   7 1748.55   79.18
   0  11  -7 1656.01   87.60
   0 -11   7 1729.31   98.59
   0  11  -8   49.87   16.78
   0  11   8   28.42   14.28
   0 -11   8   21.61   18.48
   0  11  -9  714.87   52.02
   0 -11  -9  610.54   28.42
   0 -11   9  711.89   65.90
   0  11 -10   -5.65   10.42
   0  11  10   -9.08   14.13
   0 -11  10   -0.87   14.18
   0  11 -11  532.99   41.81
   0  11 -11  482.51   37.66
   0  11  11  586.55   44.35
   0 -11  11  533.39   61.59
   0  11  12   -0.98   11.90
   0 -12   0  409.29   42.44
   0 -12   0  362.94   43.18
   0  12   0  402.80   43.65
   0 -12   1   37.48   15.22
   0  12   1   40.36   15.06
   0 -12  -1   37.85   11.79
   0  12  -1   44.34   14.33
   0  12   1   53.09   18.21
   0 -12  -1   43.79   16.33
   0 -12   1   36.42   15.75
   0  12   2 1243.81   70.74
   0 -12   2 1341.26   82.14
   0  12  -2 1311.73   75.93
   0 -12   2 1226.42   80.71
   0  12   2 1117.55   71.80
   0  12  -2 1233.18   80.65
   0  12  -3    6.89    6.13
   0  12   3   21.88   11.24
   0 -12   3    8.52   10.88
   0  12   3    1.32    6.47
   0 -12  -3    1.39    8.87
   0  12  -3    2.21    7.02
   0 -12   3    5.78   11.59
   0  12   4  831.08   57.70
   0 -12   4  922.27   71.11
   0  12  -4  857.38   63.07
   0 -12  -4  800.74   60.19
   0 -12   4  871.26   70.65
   0  12  -4  858.36   71.91
   0  12  -5    1.89   12.74
   0  12   5    3.90    9.53
   0  12  -5   -5.82   12.08
   0 -12   5    0.99   12.15
   0  12  -6  765.47   60.70
   0  12   6  732.13   54.79
   0 -12   6  735.99   66.13
   0  12  -7   52.13   19.06
   0  12   7   31.85   11.99
   0 -12   7   79.00   22.57
   0  12   8 1786.48   82.80
   0  12  -8 1694.80   88.10
   0  12  -9   24.71   14.10
   0 -12  -9    4.46    7.31
   0  12 -10  545.34   46.10
   0 -12  10  473.41   57.83
   0  12 -11   -9.73   11.85
   0  12  11   -2.18   14.80
   0  13   0   -2.67   10.64
   0 -13   0    0.51    9.35
   0 -13   1  501.23   53.31
   0 -13  -1  283.14   35.30
   0  13   1  492.30   49.24
   0  13  -1  512.59   50.81
   0 -13  -1  478.48   52.02
   0  13  -1  478.78   51.57
   0  13   1  491.95   52.22
   0 -13   1  435.18   47.76
   0  13   2   11.74   10.24
   0 -13   2   -3.47   12.23
   0  13   2   15.02   15.07
   0  13  -2    6.88    8.14
   0  13  -2   12.17   11.35
   0 -13   2    2.32   10.67
   0 -13  -2   -3.34   11.17
   0  13   3  646.28   54.00
   0  13  -3  658.81   62.63
   0  13  -3  671.67   57.10
   0 -13   3  642.44   62.50
   0 -13   3  604.82   61.02
   0  13  -4    1.03    7.97
   0  13   4   -3.49    9.75
   0  13  -4  -14.33   16.19
   0 -13   4    1.42   11.73
   0  13  -5  952.53   71.09
   0  13   5 1029.48   67.19
   0 -13   5  903.89   76.36
   0  13  -6   -0.85    9.00
   0  13   6    1.25    8.59
   0 -13   6   -2.32   15.52
   0  13   7  809.64   59.59
   0  13  -7  772.81   63.54
   0 -13   7  802.03   73.75
   0  13  -8   40.53   17.94
   0  13   8   30.22   12.29
   0 -13   8   45.97   16.05
   0  13   9 1069.50   69.00
   0  13  -9  952.88   67.07
   0 -13   9 1116.11   90.97
   0  13 -10   20.10   14.35
   0  13  10   43.15   16.09
   0  13 -11  927.07   60.23
   0  13  11  697.44   61.43
   0  14   0  504.54   62.54
   0 -14   0  355.22   40.88
   0  14   0  817.53   65.69
   0 -14   0  671.47   67.69
   0  14  -1   32.66   12.95
   0  14   1   22.42   13.19
   0  14  -1   20.91   19.40
   0 -14   1   32.54   13.68
   0  14   2  422.30   46.54
   0  14  -2  401.78   47.68
   0 -14   2  332.12   47.04
   0  14  -3   16.17   11.41
   0  14   3   11.71    7.59
   0 -14   3    8.63   15.57
   0  14  -4  840.35   70.91
   0  14   4  852.85   68.69
   0  14  -5   13.67   14.44
   0  14   5   21.59    9.80
   0 -14   5   20.08   19.03
   0  14   6  873.12   67.23
   0  14  -6  815.91   68.22
   0 -14   6  871.45   82.34
   0  14  -7   19.23   14.57
   0  14   7   -1.54   12.06
   0  14  -8  401.49   48.39
   0  14   8  359.86   43.54
   0 -14   8  331.03   49.22
   0  14  -9   73.46   21.03
   0  14   9   51.39   18.16
   0  14 -10 1330.54   81.40
   0  14  10 1276.07   80.82
   0  15   0   19.94   14.53
   0  15   1  676.20   61.78
   0  15  -1  584.67   59.40
   0  15  -2    1.56   10.17
   0  15   2    9.68   10.04
   0  15  -3  887.07   74.55
   0  15   3  842.94   70.15
   0  15  -4   23.66   15.02
   0  15   4   26.72   16.67
   0  15   5  677.11   61.87
   0 -15   5  599.87   71.09
   0  15   6   12.67   11.80
   0 -15   6  -14.72   23.81
   0  15   7  390.28   47.02
   0  15  -7  414.56   54.37
   0 -15   7  364.43   58.02
   0  15  -8   -0.63   16.35
   0  15  -9  801.10   70.71
   0  15 -10   11.05   22.36
   0  15  10    4.75   19.57
   0  16   0  589.95   61.48
   0  16   1   -1.82   13.13
   0  16  -1  -23.79   21.31
   0  16  -2  897.38   76.53
   0  16   3   27.30   15.45
   0  16  -3   -9.50   18.69
   0  16   4  957.86   76.61
   0  16  -4  915.56   79.20
   0  16   5    4.76   16.20
   0  16  -5   -3.81   20.04
   0  16   6  251.80   41.32
   0  16   7    7.50   20.21
  -1   0  13 1224.84   50.30
  -1   0  12    4.97    5.56
  -1   0  11  186.61   17.39
  -1   0  11  121.67    8.63
  -1   0  10    8.42    5.62
  -1   0  10    1.09    2.80
  -1   0   9 3224.94   61.68
  -1   0   9 3176.45   55.91
  -1   0   8   -0.50    1.92
  -1   0   8    4.92    2.55
  -1   0   7 4606.07   63.31
  -1   0   7 4596.07   60.99
  -1   0   7 4551.17   66.26
   1   0  -7 4753.19   54.14
  -1   0   6    1.11    1.17
  -1   0   6    0.05    1.53
  -1   0   6   -0.72    2.58
   1   0  -6   -0.83    1.68
  -1   0   5 6391.75   65.19
  -1   0   5 6310.87   73.47
  -1   0   4    2.06    1.29
  -1   0   4    0.60    1.14
  -1   0   4    2.57    1.76
   1   0  -4    0.01    1.55
   1   0  -2    2.04    1.11
  -1   0   2    1.50    1.38
  -1   0   2    1.49    1.50
  -1   0   0    1.38    1.72
   1   0   0    2.66    1.54
   1   0   0    1.47    1.72
   1   0   2    2.06    1.58
  -1   0  -2    1.46    1.22
   1   0   2    1.67    1.74
   1   0   4    1.67    1.00
   1   0   4    0.57    1.36
   1   0   5 5679.62   68.20
   1   0   6    2.11    1.74
   1   0   6    0.53    1.63
   1   0   6    2.85    1.40
   1   0   7 4171.75   60.95
   1   0   7 4322.71   62.78
   1   0   8    0.48    1.91
   1   0   8    6.32    3.61
   1   0   8    1.82    1.88
   1   0   9 2962.81   55.62
   1   0   9 2810.70   47.62
   1   0  10    5.70    3.73
   1   0  10    3.06    2.94
   1   0  10    1.21    1.96
   1   0  11  165.08   15.94
   1   0  12    3.52    4.64
   1   0  13 1146.24   47.23
   1   0  14  -11.70   10.05
  -1  -1  14  689.54   45.74
  -1   1  12  476.71   26.71
  -1  -1  12  420.22   31.05
  -1  -1  12  472.80   21.09
  -1  -1  11  632.75   34.93
  -1   1  11  698.25   29.89
  -1  -1  11  651.10   28.30
  -1  -1  10  743.51   35.34
  -1   1  10  770.02   28.51
  -1   1   9  134.41   11.51
  -1  -1   9  138.76   14.77
  -1  -1   9  147.17   14.58
  -1   1   9  108.67    7.11
  -1   1   9  131.49   10.45
  -1  -1   8 4546.09   77.90
  -1   1   8 4586.85   58.17
  -1   1   8 4446.13   53.61
  -1   1   8 4593.51   54.80
  -1  -1   8 4622.79   79.99
  -1  -1   7  408.81   21.94
  -1   1   7  375.92   15.95
  -1   1   7  385.13   14.34
  -1   1   7  392.92   15.79
  -1  -1   7  411.57   23.07
   1   1  -7  414.99   21.47
  -1   1   6 2693.32   37.13
  -1  -1   6 2681.39   52.81
  -1   1   6 2612.69   34.51
  -1  -1   6 2661.34   56.54
  -1   1   6 2553.77   42.09
  -1  -1   5 1486.35   38.00
  -1   1   5 1393.31   24.48
  -1  -1   5 1434.76   39.87
  -1   1   5 1481.14   31.31
   1  -1  -5 1570.51   27.90
   1   1  -5 1550.23   41.45
   1   1  -4 1601.85   25.49
  -1  -1   4 1699.51   38.47
   1  -1  -4 1567.05   30.02
  -1   1   4 1559.40   31.34
  -1  -1   4 1601.36   40.42
   1   1  -4 1590.85   23.93
  -1   1   4 1556.17   25.41
  -1  -1   3  122.73   10.31
   1   1  -3  135.05    9.36
  -1   1   3  121.31    8.94
  -1  -1   3  127.80   11.04
  -1   1   3  128.45    7.50
   1   1  -3  140.63    8.94
  -1  -1   2 2550.41   44.34
   1   1  -2 2545.77   42.21
   1   1  -2 2533.52   40.13
  -1   1   2 2373.74   40.15
  -1  -1   2 2493.59   45.62
   1  -1   2 2803.31   43.90
  -1   1  -2 2924.15   41.90
  -1   1  -3  141.55    8.54
   1  -1   3  143.84   10.03
  -1  -1  -3  148.59    9.30
   1   1   3  141.38    9.23
   1  -1   4 1663.26   36.50
   1   1   4 1621.96   30.82
   1  -1   5 1551.42   36.58
   1   1   5 1557.61   30.18
   1  -1   5 1631.36   42.69
   1  -1   6 2638.01   50.76
   1  -1   6 2541.41   54.94
   1   1   7  421.53   13.38
   1  -1   7  416.31   21.30
   1   1   7  392.86   14.64
   1   1   7  390.40   15.38
   1  -1   7  415.21   23.09
   1  -1   8 4348.78   72.96
   1   1   8 4518.83   49.86
   1  -1   8 4555.34   77.65
   1   1   9  172.37   11.26
   1  -1   9  153.25   15.35
   1  -1   9  171.72   15.71
   1  -1  10  694.88   34.12
   1   1  10  659.49   24.37
   1  -1  10  677.58   29.29
   1   1  11  616.43   25.49
   1  -1  11  659.11   34.61
   1  -1  11  677.25   27.87
   1  -1  12  482.94   30.56
   1   1  12  501.81   25.35
   1  -1  12  516.50   19.10
   1   1  13   59.00    9.90
   1   1  14 1063.37   40.65
   1  -1  14 1095.79   52.66
  -1  -2  14  150.17   19.87
  -1  -2  13  328.22   30.84
  -1  -2  13  408.89   23.60
  -1  -2  12   34.17   10.63
  -1  -2  12   62.24   10.78
  -1  -2  11 1463.52   57.64
  -1  -2  10  713.11   37.94
  -1  -2  10  742.37   37.40
  -1   2  10  704.35   21.92
  -1   2   9  522.18   20.04
  -1  -2   9  575.53   32.88
  -1   2   9  557.20   17.96
  -1  -2   9  608.25   33.50
  -1   2   8  287.82   12.70
  -1  -2   8  270.75   21.58
  -1   2   8  277.06   11.82
  -1  -2   8  256.63   21.46
   1   2  -8  280.63   21.58
  -1  -2   7 3546.74   72.72
  -1   2   7 3314.31   37.52
  -1  -2   7 3445.79   75.24
   1   2  -7 3578.49   74.67
  -1  -2   6   45.19    8.43
  -1   2   6   39.05    4.20
   1   2  -6   42.47    8.92
  -1  -2   6   43.06    8.29
   1   2  -5 6736.76   65.64
  -1  -2   5 6641.65   91.50
  -1   2   5 6333.19   51.77
   1  -2  -5 6705.96   53.49
  -1  -2   5 6472.09   96.67
   1   2  -4 3565.46   55.47
  -1  -2   4 3525.08   64.03
  -1   2   4 3556.44   41.38
   1   2  -4 3570.30   54.08
   1  -2  -4 3558.82   46.17
  -1  -2   4 3546.81   69.07
   1   2  -3  221.76   14.42
  -1  -2   3  268.70   17.46
   1   2  -3  202.10   14.68
  -1   2   3  276.93   12.54
  -1  -2   3  261.76   17.92
  -1   2   0    4.40    2.76
   1  -2   0    6.93    4.18
  -1  -2   0   11.71    4.02
   1   2   0    2.95    2.17
   1  -2   3  279.29   16.59
  -1   2  -3  217.46   13.90
   1   2   3  278.72   13.76
  -1  -2  -3  228.63   12.26
   1  -2   4 3447.95   61.06
  -1   2  -4 3510.02   51.60
  -1  -2  -4 3471.76   42.90
   1   2   4 3442.64   46.59
   1  -2   4 3426.24   68.09
   1  -2   5 6354.24   86.96
   1  -2   5 6426.97   95.57
   1  -2   6   32.40    7.13
   1  -2   6   38.06    8.26
   1  -2   7 3554.10   71.34
   1  -2   7 3612.10   77.19
   1  -2   8  290.02   21.98
   1  -2   8  263.57   21.26
   1   2   9  558.52   16.13
   1  -2   9  494.40   30.58
   1  -2   9  548.56   31.55
   1   2  10  624.69   19.38
   1  -2  10  660.70   36.88
   1  -2  10  704.04   35.52
   1  -2  11 1471.31   56.77
   1   2  11 1465.36   33.23
   1  -2  11 1551.29   51.69
   1   2  12   43.63    6.73
   1  -2  12   40.38    7.98
   1  -2  12   52.08    9.82
   1   2  13  381.75   21.14
   1  -2  13  396.10   33.89
   1  -2  13  423.48   22.29
   1  -2  13  351.44   20.58
   1  -2  14  131.47   22.16
   1   2  14  125.42   12.29
  -1  -3  14  246.61   30.80
  -1  -3  14  295.92   23.04
  -1  -3  13   18.94    9.91
  -1  -3  13   34.85   10.44
  -1  -3  12 1543.93   68.78
  -1  -3  12 1584.46   61.90
  -1   3  11   22.89    4.52
  -1  -3  11   15.19    6.24
  -1  -3  11   21.11    7.09
  -1  -3  10 2477.57   74.62
  -1   3  10 2242.85   38.37
  -1  -3   9 1095.16   49.04
  -1   3   9 1027.58   24.50
  -1  -3   9 1037.46   48.78
  -1   3   8 1090.26   23.95
  -1  -3   8 1116.20   48.06
  -1  -3   8 1106.78   48.03
   1   3  -8 1109.64   49.41
  -1   3   7  313.14   13.15
  -1  -3   7  309.16   24.30
  -1  -3   7  311.74   25.41
   1   3  -7  334.80   25.83
   1   3  -6 2572.89   45.90
  -1   3   6 2329.70   36.34
   1   3  -6 2571.51   47.79
  -1  -3   6 2437.00   64.05
  -1  -3   6 2317.95   66.57
   1   3  -5   44.41    7.24
  -1   3   5   53.90    6.01
  -1  -3   5   42.91    8.98
   1   3  -5   53.52    7.74
   1  -3  -5   48.91    5.43
  -1  -3   5   46.20    9.29
   1  -3  -5   37.77    4.91
   1   3  -4 4756.55   77.13
  -1  -3   4 4690.57   84.00
  -1   3   4 4582.66   57.67
   1  -3  -4 4775.43   61.33
   1  -3  -4 4795.39   64.07
  -1  -3   4 4783.85   88.60
   1   3  -3 7904.50  101.43
  -1  -3   3 8083.84  106.02
   1   3  -3 8219.20  113.44
  -1   3   1 2148.65   46.99
   1   3  -1 2080.39   50.31
  -1  -3   1 2126.81   51.76
   1  -3  -1 2253.90   45.60
  -1  -3   1 2208.04   54.08
   1   3  -1 2162.28   53.98
   1  -3   0 1028.62   33.14
  -1   3   0  874.83   31.30
   1   3   0  914.59   33.68
  -1  -3   0  969.29   35.11
   1   3   0  986.78   34.57
   1  -3   1 2459.95   53.07
  -1   3  -1 2488.44   52.82
   1   3   1 2495.09   51.20
  -1  -3  -1 2440.43   52.54
   1   3   1 2497.31   52.72
   1  -3   1 2416.53   58.22
   1  -3   4 4835.93   84.00
  -1   3  -4 4869.86   75.68
  -1  -3  -4 4963.09   59.84
   1   3   4 4816.29   63.94
   1  -3   4 4958.60   90.00
  -1   3  -5   40.60    6.90
   1  -3   5   31.99    7.59
  -1  -3  -5   34.95    4.03
   1   3   5   39.82    5.48
   1  -3   5   37.28    8.26
   1  -3   6 2367.10   63.16
   1   3   6 2302.76   38.02
   1  -3   6 2374.04   67.35
   1  -3   7  373.91   26.27
   1  -3   7  367.77   27.36
   1  -3   8 1135.27   47.85
   1  -3   8 1111.38   49.22
   1  -3   9 1011.05   46.89
   1  -3   9 1097.08   49.94
   1   3  10 2461.33   35.47
   1  -3  10 2421.28   75.38
   1  -3  10 2507.01   75.13
   1   3  11   23.66    3.71
   1  -3  11   18.90    7.88
   1   3  12 1402.84   31.32
   1  -3  12 1521.61   64.87
   1  -3  12 1601.05   59.17
   1  -3  13   48.05   13.07
   1   3  13   25.77    5.07
   1  -3  13   27.84    9.70
   1  -3  13   32.59    8.87
   1  -3  14  265.64   30.87
   1   3  14  213.26   13.22
   1  -3  14  196.87   18.12
   1  -3  14  307.66   22.30
  -1  -4  15  215.30   21.90
  -1  -4  14   85.48   14.89
  -1  -4  13  242.22   34.93
  -1  -4  13  284.91   30.69
  -1   4  12   26.52    4.93
  -1  -4  12   37.66   13.51
  -1  -4  12   37.58   11.32
  -1  -4  11 2021.24   78.80
  -1   4  11 2184.11   40.88
  -1   4  10   33.19    5.29
  -1  -4  10   23.65   10.25
  -1  -4  10   27.03    8.30
  -1   4   9 1303.55   31.11
  -1  -4   9 1317.95   58.23
   1   4  -9 1412.82   61.30
  -1  -4   8  183.56   23.28
  -1   4   8  242.37   13.70
  -1  -4   8  212.46   23.32
   1   4  -8  241.43   25.73
   1   4  -7  422.30   20.58
   1   4  -7  429.02   21.39
  -1   4   7  461.32   19.24
  -1  -4   7  460.63   31.82
  -1  -4   7  416.66   31.68
  -1   4   6   68.87    7.69
  -1  -4   6   69.74   13.09
   1   4  -6   72.58   10.33
   1   4  -6   67.94   10.24
   1  -4  -6   76.57    6.33
   1  -4  -6   50.04    4.93
  -1  -4   6   67.14   12.40
   1   4  -5 3050.92   69.46
  -1  -4   5 2944.52   75.30
  -1   4   5 2801.75   50.60
   1  -4  -5 2942.18   50.79
  -1  -4   5 2900.25   79.21
  -1  -4   4  483.52   29.75
  -1   4   4  481.72   21.79
   1   4  -4  477.83   28.07
   1  -4  -4  516.77   23.47
   1   4  -4  491.90   31.95
  -1  -4   4  470.16   30.92
   1  -4  -4  502.44   23.39
   1   4  -2  282.04   21.05
  -1  -4   2  284.86   21.74
  -1   4   2  280.84   17.94
   1  -4  -2  279.34   16.96
   1   4  -2  267.64   22.06
  -1  -4   2  276.73   22.39
   1  -4  -2  303.83   20.12
  -1   4   1  677.12   30.05
  -1  -4   1  716.59   32.78
   1  -4  -1  796.66   31.18
   1   4  -1  756.15   33.70
   1  -4  -1  706.69   32.18
  -1  -4   1  678.18   34.35
   1   4  -1  732.76   35.22
  -1  -4   0 1065.13   38.28
   1  -4   0  969.80   37.05
   1   4   0  982.21   37.19
  -1   4   0  949.77   36.52
  -1  -4   0  945.77   38.43
   1   4   0  928.47   37.89
   1  -4   0  858.63   38.35
  -1   4  -1  712.70   33.21
   1   4   1  785.27   31.78
   1  -4   1  700.39   32.31
  -1  -4  -1  798.32   33.51
   1  -4   1  730.44   35.85
   1   4   1  753.48   33.66
  -1   4  -2  313.90   21.36
   1  -4   2  308.29   22.17
   1   4   2  306.41   18.98
  -1  -4  -2  302.25   19.95
   1   4   2  291.19   20.01
   1  -4   2  285.27   22.32
   1  -4   4  489.61   29.56
  -1   4  -4  508.46   27.87
  -1  -4  -4  527.85   23.23
   1  -4   5 2817.64   73.42
  -1   4  -5 2896.63   64.64
  -1  -4  -5 2699.48   46.44
   1   4   5 2652.83   52.54
   1  -4   5 2850.65   77.95
  -1   4  -6   68.06    9.42
   1  -4   6   76.42   12.23
   1   4   6   52.96    6.71
   1  -4   6   60.58   13.42
  -1   4  -7  447.71   20.02
   1  -4   7  459.59   31.69
   1  -4   7  442.75   32.71
   1   4   7  441.77   16.82
   1  -4   8  200.17   21.50
   1  -4   8  218.62   24.15
   1  -4   9 1350.37   60.03
   1  -4  10   25.45    9.01
   1  -4  10   44.21   11.85
   1  -4  11 2189.20   81.17
   1  -4  11 2371.28   81.52
   1   4  12   46.31    5.65
   1  -4  12   34.67   13.12
   1   4  13  247.41   13.24
   1  -4  13  307.66   35.18
   1  -4  13  348.56   30.96
   1  -4  14   82.23   15.38
   1  -4  14   97.99   16.87
   1  -4  15  143.99   16.89
   1  -4  15  241.11   22.10
  -1  -5  15   43.16   14.48
  -1  -5  14  557.80   43.54
  -1   5  13   24.81    4.95
  -1  -5  13    6.61    9.11
  -1  -5  12  833.82   57.85
  -1   5  12  827.81   27.71
  -1  -5  12  906.87   54.54
  -1   5  11   20.24    5.46
  -1  -5  11   18.15   10.32
  -1  -5  10 2377.58   87.48
  -1   5  10 2277.35   47.71
  -1  -5  10 2390.78   86.72
  -1   5   9  491.75   22.74
  -1  -5   9  513.50   40.26
  -1  -5   9  500.88   39.38
   1   5  -9  562.07   41.49
   1   5  -8 1548.80   42.84
   1   5  -8 1481.54   41.41
  -1  -5   8 1445.97   64.75
  -1   5   8 1522.23   40.58
  -1  -5   8 1522.00   67.43
   1   5  -7  287.58   21.84
  -1   5   7  248.73   17.03
   1   5  -7  262.82   21.20
  -1  -5   7  290.63   28.75
  -1   5   6 1493.61   41.82
   1   5  -6 1579.72   54.57
   1  -5  -6 1668.91   38.88
   1   5  -6 1612.23   66.74
   1  -5  -6 1579.83   38.57
   1   5  -5  148.41   17.87
  -1   5   5  146.88   13.35
  -1  -5   5  138.25   18.72
   1  -5  -5  156.73   14.10
   1  -5  -5  143.59   13.10
   1   5  -5  139.54   18.58
  -1  -5   5  154.54   20.12
  -1  -5   4 5624.53  110.20
   1   5  -4 5489.05  104.49
  -1   5   4 5320.03   83.98
   1   5  -4 5433.19  115.07
  -1  -5   4 5383.47  113.88
   1  -5  -4 5329.74   88.85
   1   5  -3 3238.49   82.81
  -1   5   3 3259.03   67.16
  -1  -5   3 3429.86   83.27
   1  -5  -3 3409.50   57.45
  -1  -5   3 3370.94   86.64
   1   5  -3 3343.98   88.01
   1  -5  -3 3109.08   69.84
  -1  -5   2 5261.11  100.54
   1   5  -2 5369.46  100.51
  -1   5   2 5157.51   88.18
   1  -5  -2 5424.03   83.02
   1   5  -2 5073.94  104.50
   1  -5  -2 5271.59   93.25
  -1  -5   2 5110.04  104.36
  -1   5   1  246.38   20.06
  -1  -5   1  241.34   21.13
   1   5  -1  188.11   20.73
   1  -5  -1  255.62   19.76
  -1  -5   1  225.37   22.06
   1   5  -1  229.18   21.94
   1  -5  -1  237.69   21.32
   1   5   0   56.61    9.64
  -1  -5   0   45.40   10.57
  -1   5   0   53.60   10.68
   1  -5   0   46.22    9.37
   1   5   0   61.87   11.46
  -1  -5   0   48.16   10.72
   1  -5   0   45.39    9.72
   1   5   1  274.55   20.98
   1  -5   1  233.84   22.03
  -1   5  -1  253.93   22.04
  -1  -5  -1  266.93   22.47
   1  -5   1  248.33   22.69
   1   5   1  253.08   22.39
  -1   5  -2 4842.75   97.32
   1  -5   2 5235.88   99.57
   1   5   2 5314.79   89.14
   1   5   2 4887.10   91.72
  -1  -5  -2 5283.23   93.58
   1  -5   2 5242.66  104.36
  -1   5  -3 3399.41   79.51
   1  -5   3 3335.81   80.91
   1   5   3 3282.08   68.51
  -1  -5  -3 3347.90   70.34
   1  -5   3 3228.79   85.24
   1  -5   4 5374.49  105.79
   1   5   4 5404.77   84.78
  -1   5  -4 5181.79   99.88
  -1  -5  -4 5018.08   84.09
   1  -5   4 5363.04  112.13
   1   5   4 4845.01   84.18
   1  -5   5  111.16   16.28
  -1   5  -5  117.65   15.04
  -1  -5  -5  111.29   11.15
   1  -5   5  132.28   17.98
   1   5   5  133.71   13.46
  -1  -5  -6 1350.04   34.51
   1   5   6 1405.40   40.97
  -1   5  -7  264.15   20.19
   1  -5   7  249.03   26.94
   1   5   7  237.82   15.10
  -1   5  -8 1515.13   39.00
   1  -5   8 1652.32   66.00
   1  -5   8 1595.05   68.03
   1  -5   9  457.77   36.62
   1  -5   9  427.63   37.20
   1  -5  10 2237.82   84.89
   1  -5  10 2382.53   86.80
   1  -5  11   32.27   13.63
   1  -5  11   17.19    8.13
   1  -5  12  770.56   57.30
   1  -5  12  870.83   54.44
   1   5  13   29.03    4.62
   1   5  13    4.74    3.20
   1  -5  13   25.88    9.77
   1  -5  14  573.35   52.50
   1  -5  14  588.42   42.96
  -1   6  14   93.71    9.96
  -1  -6  14  122.91   25.71
  -1   6  13  631.17   25.27
  -1  -6  13  606.82   50.28
  -1   6  12   55.47    8.65
  -1  -6  12   20.96   10.06
  -1  -6  12   58.97   17.50
  -1  -6  11  767.15   57.53
  -1   6  11  782.11   31.45
  -1  -6  11  773.76   53.80
  -1  -6  10   90.01   21.56
  -1   6  10  148.46   15.00
  -1  -6  10  133.47   23.79
   1   6  -9  768.49   28.89
   1   6  -9  754.87   30.31
  -1   6   9  753.32   32.96
  -1  -6   9  764.67   50.39
  -1  -6   9  714.63   50.58
   1   6  -8  800.41   37.98
  -1  -6   8  705.22   47.10
  -1   6   8  706.94   31.73
   1   6  -8  741.27   36.86
  -1  -6   8  679.15   48.81
  -1  -6   7 1841.30   77.37
  -1   6   7 1934.69   53.31
   1   6  -7 1940.02   64.46
   1  -6  -7 1561.11   36.82
  -1  -6   7 1993.47   80.58
   1   6  -7 1947.09   79.78
   1  -6  -7 1455.89   35.32
  -1   6   6   82.20   10.68
  -1  -6   6   73.38   15.83
   1   6  -6   62.55   11.75
   1  -6  -6   80.99   10.88
   1   6  -6   77.62   14.93
  -1  -6   6   91.55   17.68
   1  -6  -6   85.75   10.60
   1   6  -5 3538.29   91.94
  -1   6   5 3415.11   73.46
   1  -6  -5 3566.71   75.77
   1   6  -5 3569.39  103.01
  -1  -6   5 3484.12  101.07
  -1   6   4 1130.66   43.76
   1   6  -4 1243.88   54.01
  -1  -6   4 1118.97   55.54
   1  -6  -4 1153.12   45.97
  -1  -6   4 1182.76   57.62
   1   6  -4 1182.62   58.23
   1   6  -3 2000.86   69.85
   1  -6  -3 1994.55   50.70
  -1  -6   3 1959.10   67.89
  -1   6   3 1853.95   56.77
   1   6  -3 1980.04   73.30
  -1  -6   3 1834.83   69.50
   1  -6  -3 1979.68   62.71
   1   6  -2  598.35   39.04
   1  -6  -2  609.57   31.92
  -1   6   2  593.77   33.96
  -1  -6   2  638.64   38.36
   1  -6  -2  679.14   36.69
  -1  -6   2  577.35   38.69
   1   6  -2  617.17   40.21
  -1   6   1 5480.27  103.71
  -1  -6   1 5532.33  109.36
   1  -6  -1 5417.84  101.29
   1   6  -1 5067.64  105.20
   1  -6  -1 5337.06  110.40
  -1  -6   1 5575.68  114.75
   1   6  -1 5413.42  114.93
   1  -6   0   23.50    7.11
  -1  -6   0   22.89    7.10
  -1  -6   0   19.32    6.57
   1  -6   0   23.03    7.73
   1   6   0   14.19    5.81
  -1   6  -1 5511.04  108.18
   1   6   1 5520.90  103.03
  -1  -6  -1 5593.98  110.14
   1  -6   1 5366.15  114.12
  -1   6  -2  604.74   37.88
   1  -6   2  656.35   39.14
   1   6   2  567.13   34.09
   1   6   2  630.96   35.79
  -1  -6  -2  668.03   36.63
   1  -6   2  613.98   40.05
  -1   6  -3 2035.95   67.44
   1   6   3 1964.74   58.70
   1  -6   3 1970.27   70.04
   1  -6   3 1877.75   71.53
   1   6   3 1874.01   60.07
  -1  -6  -3 2135.39   63.09
   1  -6   4 1089.17   52.83
   1   6   4 1112.61   43.88
  -1   6  -4 1148.91   50.26
  -1  -6  -4 1143.86   44.59
   1  -6   4 1134.80   56.19
   1   6   4 1109.04   45.10
  -1   6  -5 3329.25   85.30
   1   6   5 3276.27   73.18
   1  -6   5 3280.25   98.58
   1   6   5 3238.06   73.84
   1   6   6   89.44   11.39
   1  -6   6   83.07   16.78
  -1   6  -6   72.86   12.41
  -1  -6  -6   80.41   10.10
   1  -6   6   85.24   16.49
   1   6   6   73.94   10.91
   1  -6   7 2126.64   79.61
   1   6   7 1908.21   53.88
  -1   6  -7 1981.53   63.84
   1   6   7 1894.17   50.06
   1  -6   7 2025.31   79.68
  -1   6  -8  806.91   37.51
   1  -6   8  781.18   49.41
   1   6   8  745.07   33.95
   1  -6   8  728.71   51.14
  -1   6  -9  828.22   27.94
   1   6   9  751.37   32.91
   1  -6   9  803.78   51.54
   1  -6   9  710.55   52.33
   1  -6  10  111.56   20.81
   1   6  10  125.00   13.15
   1  -6  10  129.74   23.14
   1   6  11  737.55   30.98
   1  -6  11  771.24   58.00
   1  -6  11  790.60   54.98
   1   6  12   78.52    9.75
   1  -6  12   84.21   19.07
   1   6  13  553.41   24.23
   1  -6  13  601.57   48.08
   1  -6  14  109.58   20.19
  -1   7  13   53.70   10.55
  -1  -7  13   52.55   13.57
  -1  -7  12  739.95   58.50
  -1   7  12  741.65   34.15
  -1   7  11  217.76   18.59
  -1  -7  11  209.59   31.64
   1   7 -10  646.27   21.26
   1   7 -10  582.07   20.43
  -1   7  10  715.82   35.16
  -1  -7  10  608.51   52.46
  -1  -7  10  649.96   52.43
   1   7  -9   92.01   13.21
  -1   7   9   97.93   13.86
  -1  -7   9   59.47   18.27
   1   7  -8 2419.95   76.78
  -1  -7   8 2287.71   91.90
   1   7  -8 2447.34   77.58
  -1   7   8 2418.62   66.05
   1   7  -8 2624.40  101.66
  -1  -7   8 2345.12   93.90
  -1  -7   7  417.81   39.13
  -1   7   7  398.29   27.16
   1   7  -7  415.27   33.73
   1  -7  -7  456.67   25.12
  -1  -7   7  433.41   39.80
   1   7  -7  419.65   39.85
   1  -7  -7  444.13   24.44
   1   7  -6 2847.42   87.86
  -1  -7   6 3102.69  101.55
   1  -7  -6 2686.08   71.94
  -1  -7   6 3146.01  105.04
   1  -7  -6 2818.17   70.38
   1   7  -6 3117.91  104.15
   1   7  -5 1343.77   62.42
  -1  -7   5 1152.84   62.41
  -1  -7   5 1287.48   66.66
   1   7  -5 1293.46   66.43
   1  -7  -5 1365.50   52.91
  -1  -7   4 2753.55   90.50
   1   7  -4 2873.58   87.66
   1  -7  -4 2878.95   80.39
   1   7  -4 2944.73   97.65
  -1  -7   4 2667.40   92.61
   1  -7  -3  547.37   31.24
   1   7  -3  569.69   40.21
  -1   7   3  514.36   33.08
  -1  -7   3  529.59   40.34
   1   7  -3  546.47   41.61
  -1  -7   2 1763.84   69.26
  -1   7   2 1745.36   61.51
   1  -7  -2 1920.23   61.12
   1   7  -2 1888.64   71.05
  -1  -7   2 1746.75   71.14
   1  -7  -2 1932.48   68.57
   1   7  -2 1770.06   72.51
  -1   7   1  599.77   36.97
  -1  -7   1  616.12   39.85
   1   7  -1  504.78   38.68
   1  -7  -1  562.60   35.27
   1   7  -1  568.68   40.45
  -1  -7   1  622.07   41.34
   1  -7  -1  593.75   40.84
   1  -7   0 4945.02  107.96
  -1  -7   0 5060.31  109.90
   1   7   0 4586.50  104.33
  -1   7   0 4690.61  105.84
   1  -7   0 4614.15  111.03
  -1  -7   0 4798.35  113.26
   1   7   0 4330.31  111.35
   1  -7   1  537.62   39.04
   1   7   1  566.12   35.50
  -1   7  -1  591.71   38.13
   1   7   1  593.99   38.59
  -1  -7  -1  581.43   39.12
   1  -7   1  557.89   40.39
  -1   7  -2 1847.87   68.93
   1   7   2 1742.74   61.73
   1  -7   2 1752.04   67.81
  -1  -7  -2 1789.09   66.70
   1  -7   2 1768.66   71.23
   1   7   2 1606.21   63.85
  -1   7  -3  564.18   38.58
   1   7   3  576.21   34.31
   1  -7   3  630.41   43.44
   1   7   3  553.66   36.40
  -1   7  -4 2695.25   85.16
   1  -7   4 2978.56   92.88
  -1  -7  -4 2995.84   79.15
   1   7   4 2625.56   78.89
   1  -7   4 2795.21   94.92
  -1   7  -5 1125.17   55.78
   1  -7   5 1257.25   62.28
  -1  -7  -5 1194.22   47.90
   1  -7   5 1240.74   64.02
   1   7   5 1132.95   50.99
   1   7   6 3079.12   76.96
   1  -7   6 3190.07  102.24
  -1   7  -6 2993.80   87.85
  -1  -7  -6 2895.93   69.51
   1   7   6 3102.78   76.87
   1  -7   6 3054.78  103.34
   1  -7   7  362.47   34.77
   1   7   7  400.61   27.27
  -1   7  -7  390.12   32.13
  -1  -7  -7  286.41   18.02
   1   7   7  384.21   26.10
   1  -7   7  388.38   36.91
  -1   7  -8 2510.50   75.81
   1  -7   8 2249.05   92.54
   1   7   8 2384.16   65.09
   1   7   8 2294.68   58.09
   1  -7   8 2338.47   94.90
   1  -7   9   97.61   20.55
   1   7   9   60.96   13.52
  -1   7 -10  589.49   16.76
   1  -7  10  675.60   54.68
   1   7  10  647.08   33.50
   1  -7  10  681.26   53.87
   1   7  11  203.50   18.87
   1  -7  11  158.57   27.85
   1  -7  11  202.63   30.61
   1   7  12  721.14   33.89
   1  -7  12  756.02   57.11
   1   7  13   53.97    9.45
   1  -7  13   55.78   15.77
  -1   8  13  547.13   31.61
  -1  -8  13  493.13   51.15
  -1   8  12   52.33   11.64
  -1  -8  12   65.96   23.63
  -1   8  11  349.10   26.63
  -1  -8  11  321.56   39.41
  -1   8  10   22.51    8.50
   1   8 -10   23.24    7.77
  -1  -8  10   14.05    8.66
   1   8  -9 1154.20   55.17
   1   8  -9 1106.26   53.29
  -1   8   9 1023.24   47.33
   1   8  -9 1211.97   74.64
  -1  -8   9 1035.56   67.64
   1   8  -8   73.67   14.81
  -1   8   8   80.09   13.19
  -1  -8   8   65.30   17.52
   1   8  -8   70.70   19.83
  -1  -8   8   72.00   19.93
   1  -8  -8   62.37    7.85
   1   8  -7  941.69   54.30
  -1  -8   7  747.70   55.62
  -1   8   7  880.47   44.56
   1  -8  -7  944.96   41.54
   1  -8  -7  930.17   41.77
   1   8  -7  877.16   61.01
  -1  -8   7  784.45   57.43
   1   8  -6  407.71   35.19
  -1  -8   6  415.02   39.48
  -1   8   6  413.27   30.52
  -1  -8   6  436.90   42.25
   1  -8  -6  384.01   30.54
   1   8  -6  433.87   42.44
  -1   8   5 3449.25   89.53
  -1  -8   5 3772.68  114.53
   1   8  -5 3411.93  105.07
   1   8  -5 3436.05  114.33
   1  -8  -5 3447.55   92.36
  -1  -8   5 3428.55  114.65
  -1   8   4  402.21   31.45
   1   8  -4  409.46   35.35
  -1  -8   4  395.35   39.50
   1  -8  -4  417.42   32.82
   1   8  -4  419.07   39.29
  -1  -8   4  393.16   37.20
   1   8  -3 1609.58   70.10
  -1  -8   3 1576.71   71.58
  -1   8   3 1550.77   61.49
   1  -8  -3 1616.36   58.54
   1   8  -3 1660.51   76.53
   1  -8  -3 1699.38   67.35
  -1  -8   3 1524.05   72.97
   1   8  -2  126.12   22.81
  -1  -8   2  150.50   21.99
   1  -8  -2  169.50   19.48
  -1   8   2  149.57   20.30
  -1  -8   2  155.85   23.06
   1  -8  -2  134.16   20.63
   1  -8  -1 3912.65   97.48
   1   8  -1 3461.33  106.09
  -1   8   1 3597.76   99.16
   1   8  -1 3523.12  107.76
  -1  -8   1 3641.51  106.85
  -1   8   0  373.61   32.12
   1  -8   0  368.37   31.70
   1   8   0  340.31   31.87
  -1  -8   0  339.57   32.02
   1   8   0  389.77   35.07
  -1  -8   0  351.59   33.25
   1  -8   0  383.07   34.34
   1   8   1 3439.74   99.66
  -1   8  -1 3836.91  104.72
   1   8   1 3567.16  103.10
   1  -8   1 3807.91  110.43
   1  -8   2  152.02   20.85
  -1   8  -2  125.21   19.54
   1   8   2  124.64   17.80
  -1  -8  -2  140.04   20.86
   1  -8   2  141.40   22.49
   1   8   2  140.69   20.23
  -1   8  -3 1663.29   70.41
   1  -8   3 1573.89   71.28
   1   8   3 1482.17   61.75
  -1  -8  -3 1584.69   65.76
   1  -8   3 1614.90   75.17
   1   8   3 1466.17   65.23
   1  -8   4  474.48   40.31
  -1   8  -4  440.74   36.20
   1   8   4  429.42   32.66
  -1  -8  -4  445.22   34.14
   1  -8   4  436.83   39.29
   1   8   4  411.17   34.19
   1   8   5 3398.73   88.74
   1  -8   5 3636.40  112.52
  -1   8  -5 3339.13   99.63
  -1  -8  -5 3020.18   84.13
   1  -8   5 3301.59  110.85
   1   8   5 3191.57   88.71
   1   8   6  447.29   31.67
   1  -8   6  490.17   41.69
  -1   8  -6  447.85   36.62
  -1  -8  -6  453.29   32.39
   1  -8   6  446.09   42.06
   1   8   6  451.16   32.21
   1  -8   7  894.90   59.76
   1   8   7  850.91   43.49
  -1   8  -7  866.27   50.53
  -1  -8  -7  640.69   32.68
   1   8   7  618.30   38.47
   1  -8   7  803.34   56.95
   1  -8   8   85.60   21.12
   1   8   8   92.95   14.22
  -1   8  -8   67.60   13.86
  -1  -8  -8   47.87    6.90
   1  -8   8   70.54   18.67
  -1   8  -9 1058.25   50.00
   1   8   9  869.56   46.36
   1  -8   9  997.68   67.90
  -1   8 -10   19.82    5.88
   1   8  10   27.90   10.86
   1  -8  10   20.87   12.41
   1   8  11  284.59   24.99
   1  -8  11  314.79   39.78
   1   8  12   66.23   11.86
   1  -8  12   62.09   18.27
   1  -8  13  546.32   54.13
  -1   9  13   13.25    9.06
  -1   9  12  355.30   30.74
  -1  -9  12  379.21   46.94
   1   9 -11  217.13   14.89
   1   9 -11  261.95   16.17
  -1   9  11  259.33   25.09
  -1  -9  11  241.51   37.25
   1   9 -10  499.81   37.06
   1   9 -10  511.11   35.50
  -1   9  10  560.01   38.56
  -1  -9  10  547.71   53.56
   1   9  -9   40.58   12.03
   1   9  -9   27.17   12.73
  -1  -9   9   32.46   14.17
  -1   9   9   20.66    8.78
   1   9  -9   18.41    8.04
  -1  -9   9   25.00   14.54
  -1   9   8 1879.11   70.88
   1   9  -8 2100.85   83.71
   1  -9  -8 1935.48   56.61
   1   9  -8 1716.23  100.59
  -1  -9   8 1934.55   96.97
  -1   9   7  100.95   18.69
  -1  -9   7  125.41   23.63
   1   9  -7  136.48   23.11
   1  -9  -7  143.11   17.53
   1  -9  -7  126.16   18.28
   1   9  -7  155.18   27.79
  -1  -9   7  130.55   25.41
  -1  -9   6 2189.89   95.80
  -1   9   6 2045.89   74.73
   1   9  -6 2082.46   88.11
  -1  -9   6 2051.25   95.47
   1  -9  -6 2107.89   74.62
   1   9  -6 2109.16   98.30
   1   9  -5  247.05   29.42
  -1  -9   5  238.09   31.13
  -1   9   5  210.27   25.31
   1  -9  -5  224.20   26.73
   1   9  -5  195.56   31.76
  -1  -9   5  233.64   31.73
  -1   9   4 1366.56   62.38
   1   9  -4 1231.73   67.33
  -1  -9   4 1393.54   75.49
   1  -9  -4 1409.45   66.35
  -1  -9   4 1327.16   73.23
   1  -9  -3  226.06   22.50
   1   9  -3  201.31   26.76
  -1   9   3  205.63   24.47
  -1  -9   3  197.84   26.22
  -1  -9   3  188.75   27.59
   1   9  -3  193.46   27.58
   1  -9  -3  225.35   27.23
  -1   9   2 1757.64   75.44
  -1  -9   2 1890.14   80.84
   1  -9  -2 1775.91   67.91
   1   9  -2 2093.83   84.42
   1  -9  -2 2031.94   81.55
   1   9  -2 2039.62   88.55
  -1  -9   2 1907.01   84.85
  -1  -9   1   38.39   12.66
  -1   9   1   54.42   13.88
   1   9  -1   52.37   13.77
   1  -9  -1   52.21   15.15
   1   9  -1   46.02   14.70
   1   9   0 3842.26  110.92
  -1   9   0 3704.76  108.91
  -1  -9   0 3892.18  111.61
   1  -9   0 3737.72  105.49
  -1  -9   0 3567.03  112.50
   1  -9   0 3688.30  114.54
   1   9   0 3583.31  111.95
  -1   9  -1   52.51   14.10
   1  -9   1   44.83   13.02
   1   9   1   56.53   13.21
  -1  -9  -1   43.43   13.46
   1   9   1   40.58   12.59
   1   9   2 1849.67   76.53
  -1   9  -2 2183.16   84.08
   1  -9   2 1995.54   83.00
   1  -9   2 2013.58   87.31
  -1  -9  -2 2086.26   82.08
   1   9   2 1916.56   80.42
  -1   9  -3  193.37   25.94
   1  -9   3  190.46   25.80
   1   9   3  164.71   22.93
   1   9   3  192.87   25.16
  -1  -9  -3  214.94   24.73
   1  -9   3  183.58   27.37
  -1   9  -4 1357.52   66.69
   1  -9   4 1340.80   71.94
   1   9   4 1376.80   62.24
   1  -9   4 1398.30   74.28
   1   9   4 1259.00   64.15
  -1  -9  -4 1316.41   62.89
   1  -9   5  234.79   31.23
  -1   9  -5  224.23   27.64
   1   9   5  179.72   22.99
  -1  -9  -5  188.03   22.60
   1  -9   5  201.19   29.38
   1   9   5  181.32   24.17
   1  -9   6 2129.14   94.84
   1   9   6 2143.29   75.08
  -1   9  -6 2182.70   85.45
   1  -9   6 2107.86   95.89
   1   9   6 1961.80   73.76
   1   9   7  119.86   17.08
   1  -9   7  121.79   24.89
  -1   9  -7  121.39   20.09
  -1  -9  -7   81.98   12.12
   1  -9   7  101.72   21.92
   1   9   7   91.86   16.76
   1  -9   8 1278.66   75.08
   1   9   8 1825.57   68.81
  -1   9  -8 2108.08   82.77
   1  -9   8 1918.65   96.71
  -1   9  -9   47.37   11.26
   1  -9   9   18.48   10.78
   1   9   9   42.60   11.82
   1  -9   9   17.03   11.58
  -1   9 -10  518.46   34.94
   1   9  10  477.61   37.93
   1  -9  10  576.70   55.69
  -1   9 -11  224.22   13.39
   1   9  11  237.47   24.52
   1   9  12  413.72   31.98
   1  -9  12  357.51   46.68
   1   9  13   14.10    9.62
  -1  10  12   31.24   12.40
   1  10 -11  391.41   29.04
   1  10 -11  421.33   30.79
  -1  10  11  431.00   35.28
  -1 -10  11  335.73   50.28
   1  10 -10  148.25   23.76
   1  10 -10  162.70   22.69
  -1  10  10  162.78   22.04
  -1 -10  10  141.70   29.70
   1  10  -9  417.79   38.22
  -1  10   9  429.43   37.11
   1  10  -9  427.00   50.24
   1 -10  -9  270.40   17.57
  -1 -10   9  427.62   50.02
  -1  10   8   58.36   14.56
   1  10  -8   46.96   13.96
   1 -10  -8   67.88   13.72
  -1 -10   8   67.30   20.64
   1 -10  -8   42.91   11.02
   1  10  -8   61.02   21.49
  -1  10   7 2031.23   79.44
   1  10  -7 2146.13   93.63
  -1 -10   7 1086.21   72.99
   1 -10  -7 2169.38   78.31
   1  10  -7 2183.73  106.63
   1 -10  -7 1375.91   61.13
  -1 -10   7 1967.61  100.50
  -1  10   6  114.19   20.47
   1  10  -6  137.64   25.64
  -1 -10   6  145.92   27.71
  -1  10   5  704.86   48.20
   1  10  -5  755.11   54.89
  -1 -10   5  655.82   54.30
   1  10  -5  746.23   58.92
  -1 -10   5  667.44   56.00
   1 -10  -5  640.68   47.86
   1  10  -4  494.90   44.19
  -1 -10   4  448.56   44.22
  -1  10   4  456.49   39.03
   1 -10  -4  471.94   41.13
   1  10  -4  455.37   46.80
  -1 -10   4  414.15   44.57
  -1  10   3 1712.41   76.70
   1 -10  -3 1746.67   67.86
  -1 -10   3 1754.98   85.82
   1  10  -3 1712.40   80.31
   1 -10  -3 1757.72   81.13
   1  10  -3 1602.97   86.00
   1  10  -2  249.40   31.47
  -1  10   2  287.79   31.14
  -1 -10   2  274.91   34.43
   1 -10  -2  254.83   31.39
   1  10  -2  265.45   33.65
  -1 -10   2  260.23   34.22
   1  10  -1 2726.61  100.31
  -1  10   1 2781.18   98.49
   1 -10  -1 2801.72   96.32
  -1 -10   1 2941.18  104.26
   1 -10  -1 2652.74  101.58
   1  10  -1 2448.17  101.81
  -1 -10   1 2625.51  104.52
   1 -10   0   79.24   17.99
  -1 -10   0   74.11   17.54
  -1  10   0  115.78   19.75
   1  10   0  111.64   20.29
  -1 -10   0   86.82   19.86
   1 -10   0   87.32   21.30
   1  10   0  101.34   20.87
   1 -10   1 2931.80  100.83
   1  10   1 2647.74   98.44
  -1  10  -1 2620.44   97.79
   1  10   1 2620.99  100.31
   1 -10   1 2698.38  104.41
  -1 -10  -1 2705.81  102.38
   1 -10   2  236.76   32.05
   1  10   2  264.02   31.59
  -1  10  -2  249.77   29.93
  -1 -10  -2  295.90   33.68
   1 -10   2  305.24   35.55
   1  10   2  267.24   31.69
   1 -10   3 1602.77   79.64
   1  10   3 1770.81   78.18
  -1  10  -3 1727.96   80.46
  -1 -10  -3 1671.61   77.54
   1  10   3 1817.40   80.17
  -1  10  -4  485.73   43.47
   1  10   4  453.44   38.60
   1 -10   4  443.87   43.60
   1 -10   4  447.45   45.23
  -1 -10  -4  474.10   41.67
   1  10   4  391.56   36.93
   1 -10   5  766.76   57.40
   1  10   5  754.53   50.20
  -1  10  -5  747.37   54.98
  -1 -10  -5  553.15   42.27
   1  10   5  686.57   47.45
   1 -10   5  655.52   56.30
  -1  10  -6  171.26   25.15
   1  10   6  194.10   24.71
   1 -10   6  158.89   27.78
   1  10   7 2059.97   81.27
  -1  10  -7 2175.68   89.74
  -1 -10  -7 1973.55   74.17
   1  10   7 1898.10   75.29
   1 -10   7 2077.67  102.34
   1  10   8   44.03   12.18
   1 -10   8   26.19    9.05
  -1  10  -8   58.38   14.88
  -1 -10  -8   16.50    6.50
   1 -10   8   37.35   15.07
   1  10   9  405.37   37.03
  -1  10  -9  406.02   37.67
  -1 -10  -9  303.43   14.87
   1 -10   9  432.15   48.52
  -1  10 -10  164.08   22.97
   1  10  10  160.83   22.51
   1 -10  10  123.89   26.76
  -1  10 -11  427.10   28.66
  -1  10 -11  434.62   30.10
   1  10  11  441.27   38.92
   1 -10  11  421.76   53.22
   1  10  12   27.74   14.24
  -1  11  12  656.18   49.34
   1  11 -11   39.34   15.15
  -1  11  11   35.88   13.46
   1  11 -11   45.46   13.07
   1  11 -10  721.10   49.95
   1  11 -10  777.93   53.39
  -1  11  10  742.27   50.51
  -1 -11  10  702.24   68.78
   1  11  -9  127.93   33.06
   1  11  -9  194.03   28.12
  -1  11   9  142.05   22.77
   1 -11  -9  106.99   13.66
  -1 -11   9  170.54   36.23
  -1  11   8  825.51   53.85
   1 -11  -8  829.08   47.15
  -1 -11   8  706.56   66.47
  -1  11   7  280.83   31.97
  -1 -11   7  271.84   41.88
   1  11  -7  242.28   41.77
  -1  11   6 1547.14   74.90
  -1 -11   6 1409.08   87.11
   1 -11  -6 1302.64   67.74
   1  11  -6 1654.68   95.41
  -1  11   5   54.79   15.07
  -1 -11   5   17.28    8.46
   1  11  -5   43.19   15.12
  -1 -11   5   39.16   14.90
   1 -11  -5   40.00   12.92
   1  11  -5   51.46   16.62
  -1  11   4  652.63   48.30
   1  11  -4  645.08   55.99
   1  11  -4  663.62   57.85
  -1 -11   4  635.10   57.67
   1  11  -3  658.45   52.53
  -1  11   3  728.46   52.21
  -1 -11   3  754.17   59.73
   1 -11  -3  691.25   53.98
   1  11  -3  682.45   58.22
  -1 -11   3  591.74   54.18
  -1  11   2 2383.77   94.72
   1  11  -2 2125.23   98.13
   1 -11  -2 1962.34   81.75
  -1 -11   2 1880.00   90.47
   1 -11  -2 2373.96  102.48
  -1 -11   2 2339.71  104.94
   1  11  -2 2086.73  102.89
  -1 -11   1   37.02   12.99
  -1  11   1   27.36   12.67
   1 -11  -1   55.77   15.16
   1  11  -1   26.78   13.73
   1 -11  -1   35.94   12.57
   1  11  -1   51.08   15.81
  -1 -11   1   30.87   15.21
   1  11   0  986.10   62.72
  -1  11   0  969.50   61.91
   1 -11   0  818.36   56.42
  -1 -11   0  769.81   55.68
   1 -11   0 1014.91   67.20
   1  11   0  883.97   64.55
  -1 -11   0  962.76   66.05
  -1  11  -1   61.70   16.76
   1  11   1   26.40   12.67
   1 -11   1   28.40   11.66
   1 -11   1   59.53   17.98
   1  11   1   42.97   13.43
  -1 -11  -1   48.56   14.23
   1 -11   2 2099.20   92.81
  -1  11  -2 2198.23   96.15
   1  11   2 2132.52   92.94
   1 -11   2 2232.78  103.72
   1  11   2 2071.18   92.33
  -1 -11  -2 2011.17   92.64
  -1  11  -3  689.45   54.75
   1  11   3  698.02   53.54
   1 -11   3  571.32   47.58
   1 -11   3  780.73   62.38
  -1 -11  -3  598.35   49.72
   1  11   3  744.15   54.45
   1  11   4  676.94   50.34
  -1  11  -4  734.79   55.66
   1 -11   4  687.09   58.24
  -1  11  -5   40.70   15.03
   1  11   5   33.87   13.64
   1 -11   5   47.52   15.73
   1 -11   5   37.45   14.22
   1  11   5   45.19   14.20
  -1 -11  -5   23.09   11.01
   1 -11   6 1473.08   86.75
   1  11   6 1654.68   78.16
   1  11   7  270.43   33.13
   1  11   7  277.20   31.57
   1 -11   7  310.59   41.98
   1  11   8  715.17   52.78
   1 -11   8  705.71   64.38
  -1  11  -9  156.37   25.30
   1  11   9  136.54   21.90
   1 -11   9  145.99   32.35
  -1  11 -10  706.93   50.80
   1  11  10  780.06   52.40
   1 -11  10  744.26   67.72
  -1  11 -11   32.54   12.16
   1  11  11   18.90   10.46
   1 -11  11   34.11   22.23
   1  11  12  864.70   53.92
   1  12 -11  867.38   56.50
  -1  12  11  939.10   60.38
  -1  12  10   -3.59   10.54
   1  12 -10    8.15   13.01
  -1 -12  10  -16.50   15.68
   1  12  -9  794.09   59.21
   1 -12  -9  862.79   43.35
   1  12  -8  197.31   37.26
   1  12  -8  228.94   33.33
   1 -12  -8  180.65   27.91
  -1 -12   8  179.66   34.40
   1  12  -7  374.17   44.74
  -1 -12   7  397.50   50.76
   1  12  -6   76.38   21.15
  -1  12   6  118.33   22.60
  -1 -12   6   92.49   25.69
   1  12  -6   62.75   21.81
  -1  12   5 1265.16   72.33
   1  12  -5 1108.60   77.90
   1  12  -5 1249.36   85.43
  -1 -12   5 1114.40   84.29
  -1  12   4  166.91   26.63
   1  12  -4  141.96   25.81
  -1 -12   4  164.78   30.89
  -1 -12   4  135.62   30.34
   1  12  -4  164.36   31.21
   1 -12  -4   84.41   18.48
  -1  12   3 1115.87   69.49
   1  12  -3 1067.88   70.31
  -1 -12   3 1104.63   77.40
   1 -12  -3 1173.35   73.66
   1  12  -3 1031.19   74.61
   1  12  -2   85.66   22.01
  -1  12   2   78.58   23.28
   1 -12  -2  101.01   18.79
  -1 -12   2   95.08   24.88
   1  12  -2   98.76   24.18
  -1 -12   1 1417.97   83.23
   1 -12  -1 1424.25   75.62
   1 -12  -1 1325.85   80.48
   1  12  -1 1326.57   82.92
  -1 -12   1 1317.30   84.44
   1 -12   0    0.41    7.78
  -1 -12   0    5.68    7.74
   1  12   0    9.45    8.95
   1 -12   0   13.50   12.76
  -1 -12   0    3.05   14.02
   1  12   1 1196.54   77.70
  -1 -12  -1 1301.67   80.94
   1 -12   1 1376.49   84.90
  -1  12  -2  100.88   23.75
   1  12   2  120.74   22.91
   1 -12   2  112.74   24.56
  -1  12  -3 1058.84   68.63
   1  12   3 1048.65   69.27
  -1 -12  -3 1023.78   68.47
   1 -12   3 1105.05   79.20
   1  12   3 1049.77   70.34
  -1  12  -4  124.56   25.22
   1 -12   4   95.75   20.30
   1  12   4  129.55   23.34
   1  12   4  135.87   24.46
  -1 -12  -4   83.84   21.28
   1 -12   4  176.05   32.55
   1  12   5 1164.31   74.22
  -1  12  -5 1176.13   73.69
   1 -12   5 1302.57   86.52
  -1  12  -6  120.25   22.37
   1  12   6  108.57   22.72
   1 -12   6  100.79   24.46
   1  12   6   93.75   20.30
  -1  12  -7  338.00   40.52
   1  12   7  346.06   41.42
   1 -12   7  397.09   48.67
  -1  12  -8  217.32   31.93
   1 -12   8  234.72   38.24
  -1  12  -9  766.83   58.85
  -1  12 -10    0.51   11.50
   1  12  10    2.17   12.55
   1 -12  10   -3.26   18.26
  -1  12 -11 1032.46   55.05
   1  12  11  918.79   61.43
   1  13 -11   -6.03   17.40
  -1  13  11   -7.69   16.17
   1  13 -10  626.86   55.34
  -1  13  10  779.68   60.69
  -1  13   9   38.46   16.73
   1  13  -9   38.49   13.74
   1 -13  -9   46.77   17.03
  -1 -13   9   46.16   20.07
   1  13  -8  973.72   72.00
  -1  13   8  811.99   63.19
  -1 -13   8  845.84   79.42
  -1  13   7   41.93   14.32
   1  13  -7   49.36   17.02
  -1 -13   7   25.74   18.00
   1  13  -7   17.95   13.74
  -1  13   6  533.61   48.47
   1  13  -6  525.34   54.36
   1  13  -6  376.30   60.25
  -1 -13   6  451.33   56.07
   1  13  -5   28.63   13.06
  -1  13   5   11.15    9.44
  -1 -13   5   18.91   15.88
   1  13  -5   16.96   15.58
   1  13  -4 1155.90   77.85
  -1  13   4 1087.03   71.25
  -1 -13   4 1063.51   83.35
   1  13  -4 1090.86   83.82
   1  13  -3   44.78   17.51
  -1  13   3   42.32   15.95
   1 -13  -3   25.08   10.14
   1  13  -3   36.24   15.13
  -1 -13   3   30.75   18.55
   1 -13  -2  883.99   60.33
  -1  13   2  907.38   66.40
   1  13  -2  843.85   65.42
   1 -13  -2  802.46   65.20
  -1 -13   2  822.00   71.49
   1  13  -2  844.89   69.90
  -1  13   1   58.25   17.76
   1 -13  -1   23.71    9.37
   1  13  -1   49.48   18.29
  -1 -13   1    6.90   10.31
   1 -13  -1   34.65   15.09
   1  13  -1   44.81   19.81
   1  13   0  740.77   62.62
  -1  13   0  747.05   63.82
   1 -13   0  724.37   63.90
  -1 -13   0  838.29   69.91
  -1  13  -1   38.98   15.16
   1 -13   1   21.65   13.38
   1  13   1   43.03   15.58
  -1 -13  -1   29.20   12.90
   1  13   1   34.67   16.57
  -1  13  -2  805.24   66.20
   1 -13   2  423.62   44.29
   1  13   2  813.59   62.80
  -1 -13  -2  511.48   51.86
   1 -13   2  894.63   71.52
   1  13   2  845.92   66.30
  -1  13  -3   27.19   14.41
   1  13   3   37.96   14.48
   1  13   3   33.04   15.10
   1 -13   3   51.14   19.59
   1  13   4  951.51   71.32
   1 -13   4 1004.99   78.72
   1  13   4  825.45   63.64
  -1  13  -5   21.03   14.95
   1  13   5   22.80   11.73
   1 -13   5   28.22   14.71
   1  13   5   35.62   13.21
  -1  13  -6  489.28   50.84
   1  13   6  515.83   49.51
   1 -13   6  466.23   57.08
   1  13   6  506.94   49.31
  -1  13  -7   66.45   20.19
   1  13   7   14.70   14.79
   1 -13   7   59.18   22.23
   1  13   8  647.64   64.33
   1 -13   8  810.28   79.46
  -1  13  -9   42.94   16.20
   1  13   9   48.76   19.54
   1 -13   9   26.24   17.64
  -1  13 -10  837.29   61.11
   1  13  10  809.36   61.06
  -1  13 -11   -8.79   16.35
   1  13  11    3.79   17.19
   1  14 -10   -0.87   20.05
  -1  14  10   29.31   14.50
  -1  14   9  606.87   56.79
   1  14  -9  629.52   59.09
   1  14  -8   18.93   14.22
  -1  14   8   43.10   17.26
  -1 -14   8  -11.98   26.81
  -1  14   7  620.29   58.31
   1  14  -7  459.95   68.90
   1  14  -7  560.16   57.33
  -1 -14   7  556.19   68.92
   1  14  -6   60.13   21.87
  -1  14   6   75.86   22.31
  -1 -14   6   84.25   30.78
   1  14  -6   72.28   27.21
  -1  14   5  611.66   54.36
   1  14  -5  454.21   55.37
   1  14  -5  586.26   64.77
  -1  14   4  130.61   27.45
   1  14  -4   99.61   29.34
   1  14  -4   98.47   32.12
   1  14  -3 1422.16   89.62
  -1  14   3 1369.44   85.06
  -1 -14   3 1359.27   97.52
  -1  14   2  108.24   23.49
   1  14  -2  117.24   27.48
   1 -14  -2  141.37   26.92
  -1 -14   2  114.99   29.15
   1  14  -2   68.07   25.55
   1  14  -1  591.87   57.39
  -1  14   1  674.57   58.35
  -1 -14   1  611.60   63.36
   1  14  -1  602.43   62.47
  -1  14   0   97.13   24.05
   1 -14   0   27.22   15.24
   1  14   0   61.24   19.19
   1  14   0   61.15   20.96
  -1  14  -1  564.32   57.46
   1  14   1  548.95   58.37
   1  14   1  667.45   61.33
   1 -14   1  611.23   64.14
  -1  14  -2  146.43   27.97
   1  14   2  133.08   26.29
   1  14   2  101.89   26.44
   1 -14   2  106.91   26.19
  -1  14  -3 1471.78   90.60
   1  14   3 1407.59   85.95
   1 -14   3 1302.20   94.41
  -1  14  -4   98.74   25.34
   1  14   4   93.06   23.77
   1  14   4  114.62   25.90
   1  14   5  551.38   55.03
  -1  14  -5  599.02   57.32
   1  14   5  579.78   57.18
  -1  14  -6   94.85   25.31
   1  14   6  102.18   25.96
   1 -14   6   64.94   22.71
  -1  14  -7  523.47   54.89
   1  14   7  581.77   54.51
   1 -14   7  530.09   67.46
  -1  14  -8   35.09   19.75
   1  14   8   47.37   20.52
   1 -14   8   -6.54   22.62
  -1  14  -9  624.71   60.26
   1  14   9  495.06   51.20
  -1  14 -10   15.22   16.14
   1  14  10   30.59   16.75
  -1  15  10  260.61   39.37
   1  15 -10  202.84   39.39
  -1  15   9   15.32   21.04
   1  15  -9   31.69   23.48
   1  15  -8  322.69   48.91
   1  15  -7   64.07   23.44
  -1 -15   7   39.60   30.93
   1  15  -6  579.57   62.53
  -1  15   6  604.43   62.22
  -1 -15   6  475.81   65.78
   1  15  -5  363.43   56.69
  -1  15   5  404.74   47.79
  -1  15   4 1187.72   83.06
   1  15  -4 1278.68   98.20
  -1  15   3   41.95   19.47
   1  15  -3   32.12   20.26
   1  15  -3   33.62   17.20
   1  15  -2  489.32   57.07
  -1  15   2  516.66   56.42
   1  15  -2  410.05   58.52
  -1  15   1  107.61   27.64
   1  15  -1   70.73   24.48
   1 -15  -1   58.13   16.37
   1  15  -1   63.71   24.99
  -1  15   0  382.40   50.58
   1  15   0  380.02   49.54
   1  15   0  255.39   44.77
  -1  15  -1   78.74   23.60
   1  15   1  104.83   27.16
   1  15   1   65.27   23.71
  -1  15  -2  575.27   57.49
   1  15   2  510.99   54.75
   1  15   2  573.32   59.64
  -1  15  -3   61.38   17.59
   1  15   3   35.83   21.62
   1  15   3   40.34   18.79
   1  15   4 1111.13   84.28
   1  15   5  312.54   43.70
  -1  15  -6  663.70   63.03
   1  15   6  583.26   60.65
   1 -15   6  656.31   75.44
  -1  15  -7  101.44   26.46
   1  15   7   40.39   21.83
   1 -15   7   32.03   25.17
  -1  15  -8  362.94   48.92
  -1  15  -9    6.11   17.89
   1  15   9   20.64   16.10
  -1  15 -10  205.45   41.79
   1  15  10  235.12   41.31
  -1  16   6   69.41   30.79
  -1  16   5 1231.23   87.56
  -1  16   4   99.60   28.64
   1  16  -4   82.65   30.99
   1  16  -4   60.27   33.20
   1  16  -3  582.09   64.32
  -1  16   3  504.60   56.35
   1  16  -3  582.93   70.09
  -1  16   2   39.46   22.68
   1  16  -2   12.99   15.24
   1  16  -2   -3.20   15.27
  -1  16   1  689.27   66.04
   1  16  -1  621.50   65.31
   1  16  -1  459.30   60.96
  -1  16   0  120.38   28.59
   1  16   0  128.07   29.92
   1  16   0  118.26   29.21
  -1  16  -1  597.02   61.65
   1  16   1  573.76   62.20
   1  16   2   -3.00   16.07
   1  16   2    7.75   12.49
  -1  16  -2    1.71   12.88
  -1  16  -3  505.47   58.28
   1  16   3  527.66   57.38
   1  16   4   93.12   24.38
  -1  16  -4  117.87   26.43
   1  16   5 1119.57   84.81
   1  16   6  125.71   30.35
   1  17  -1   25.45   23.12
   1  17   0  312.20   55.07
  -2   0  12 1367.46   37.08
  -2   0  11   -4.02    3.78
  -2   0   9   -1.11    3.18
   2   0  -9    0.35    2.47
  -2   0   8 2175.36   56.77
  -2   0   8 2236.76   59.21
   2   0  -8 2299.85   54.41
  -2   0   7    0.66    2.86
  -2   0   7    1.54    3.02
   2   0  -7   -1.93    4.04
  -2   0   6 9938.90  122.47
   2   0  -6 9999.00  119.14
  -2   0   5    1.91    4.12
  -2   0   5   -1.11    2.11
   2   0  -4 1163.09   31.15
  -2   0   4 1229.14   41.32
   2   0  -4 1143.54   30.03
  -2   0   4 1176.73   36.49
   2   0  -3    2.64    2.83
   2   0  -3    2.91    3.07
  -2   0   3    2.50    1.72
  -2   0   3    4.44    2.85
   2   0  -2  149.32   12.27
  -2   0   2  196.19   14.71
   2   0  -2  162.09   14.24
  -2   0   2  207.38   16.17
   2   0  -1    2.22    1.94
  -2   0   1    2.10    2.32
   2   0  -1   -0.37    1.41
  -2   0   1    0.76    2.11
  -2   0  -1    3.61    2.15
   2   0   1    2.11    1.97
  -2   0  -1    2.44    3.79
   2   0   1   -1.01    1.72
  -2   0  -2  136.78   11.55
   2   0   2  163.98   14.71
  -2   0  -3    3.84    1.75
   2   0   3    2.27    2.23
   2   0   3   -1.09    2.15
   2   0   4 1320.37   37.39
   2   0   4 1168.04   40.37
   2   0   5   -1.78    3.53
   2   0   5   -0.12    2.76
   2   0   6 9322.10  103.67
   2   0   6 9240.53  112.69
   2   0   7   -1.77    2.69
   2   0   7    4.04    4.84
   2   0   8 2051.45   53.86
   2   0   8 2001.33   52.83
   2   0   9   -3.01    3.55
   2   0   9    2.75    4.20
   2   0   9    7.36    5.58
   2   0  10  604.04   31.79
   2   0  10  568.59   27.60
   2   0  10  621.99   29.25
   2   0  11    1.96    4.02
   2   0  11   -0.19    2.38
   2   0  11   -5.23    3.40
   2   0  12 1101.76   23.05
   2   0  12 1121.21   23.91
   2   0  14  666.42   40.96
  -2  -1  13 1521.51   41.91
  -2  -1  12  371.37   24.60
  -2  -1  11  980.25   41.88
  -2   1  10  471.65   26.93
  -2  -1  10  541.88   32.07
  -2   1  10  487.92   24.02
   2   1 -10  569.52   26.80
  -2  -1   9 2337.46   69.51
  -2   1   9 2346.29   56.81
  -2   1   9 2425.21   56.74
  -2  -1   9 2397.64   66.98
   2   1  -9 2553.77   62.74
  -2  -1   8   66.84   12.42
  -2   1   8   71.33    9.44
  -2  -1   8   70.54   11.60
  -2   1   8   61.95    8.96
   2  -1  -8   63.42    8.23
   2   1  -8   76.99   12.07
  -2  -1   7 3611.20   80.16
  -2   1   7 3417.51   63.85
  -2   1   7 3364.26   67.40
  -2  -1   7 3558.70   79.80
   2   1  -7 3749.44   79.70
   2  -1  -7 3623.55   63.53
  -2  -1   6  660.38   30.87
  -2   1   6  616.27   25.98
  -2   1   6  635.69   29.00
  -2  -1   6  652.81   33.62
   2  -1  -6  699.30   29.33
   2   1  -6  686.34   33.51
   2   1  -5 4766.42   63.83
   2  -1  -5 4896.58   78.71
  -2   1   5 4733.60   79.19
   2   1  -5 4787.34   61.46
  -2   1   5 4679.82   70.36
  -2  -1   5 4947.35   80.77
   2  -1  -4  549.79   18.49
   2  -1  -4  560.51   19.03
   2   1  -4  541.95   23.93
  -2  -1   4  599.45   30.34
  -2   1   4  611.23   28.03
  -2   1   4  574.53   24.27
   2   1  -4  599.77   24.66
  -2  -1   4  596.18   27.49
   2   1  -3 2200.72   51.24
  -2  -1   3 2171.83   51.57
  -2   1   3 2035.26   45.41
   2   1  -3 2298.97   50.53
   2  -1  -3 2264.96   44.86
  -2  -1   3 2227.79   57.56
  -2   1   3 2131.95   52.03
  -2   1   2  231.87   15.62
   2   1  -2  252.41   16.82
   2  -1  -2  217.42   15.56
  -2  -1   2  236.80   17.20
  -2   1   2  248.03   17.77
   2   1  -2  240.12   18.06
   2  -1  -1 2073.29   48.67
  -2   1   1 1940.82   45.02
   2   1  -1 2182.33   49.14
  -2  -1   1 2100.71   52.67
   2   1  -1 2033.41   52.61
  -2   1   1 2052.74   51.79
   2  -1  -1 2097.76   51.37
  -2  -1   0 1007.31   33.63
  -2   1   0 1031.27   33.10
   2  -1   0 1002.22   34.01
   2   1   0  999.10   33.90
  -2   1   0 1086.47   37.46
  -2  -1   0 1116.39   38.58
   2  -1   0 1056.34   36.67
   2   1   0  999.72   36.38
  -2   1  -1 2036.94   46.66
   2  -1   1 2167.88   50.01
   2   1   1 2149.04   47.91
  -2  -1  -1 2137.86   51.80
   2   1   1 1953.76   49.40
  -2   1  -1 2154.98   54.12
   2  -1   1 2026.75   52.97
  -2   1  -2  247.65   16.60
   2   1   2  272.65   16.80
   2  -1   2  265.63   17.55
  -2  -1  -2  243.69   17.52
   2   1   2  257.11   17.51
   2  -1   2  233.10   18.39
   2  -1   3 2397.46   53.72
   2   1   3 2457.45   49.74
  -2   1  -3 2425.81   49.76
   2  -1   3 2339.49   57.93
   2   1   3 2315.98   52.95
   2   1   4  641.42   25.56
   2  -1   4  585.37   28.10
  -2   1  -4  656.45   24.26
   2   1   4  579.48   27.72
  -2  -1  -4  563.55   27.38
   2  -1   4  558.05   29.24
   2  -1   5 4956.51   81.03
   2   1   5 4873.25   69.53
   2  -1   5 4763.60   87.01
   2   1   6  627.02   25.22
   2  -1   6  627.50   30.20
   2  -1   6  611.66   31.90
   2   1   6  624.34   27.89
   2  -1   7 3422.02   72.76
   2   1   7 3498.00   61.58
   2   1   7 3260.56   64.58
   2  -1   7 3349.71   74.71
   2  -1   8   83.24   13.16
   2   1   8   61.58    8.85
   2   1   8   68.56    8.77
   2  -1   8   62.43   11.06
   2  -1   8   66.83   11.50
   2   1   9 2351.12   55.14
   2  -1   9 2410.13   65.60
   2  -1   9 2298.98   65.59
   2   1   9 2290.19   49.57
   2  -1   9 2452.96   65.66
   2  -1  10  507.96   31.84
   2   1  10  531.46   27.64
   2  -1  10  526.97   29.64
   2   1  10  474.70   20.34
   2  -1  10  573.78   31.76
   2   1  10  491.93   21.84
   2   1  11 1045.04   40.26
   2  -1  11 1045.95   47.61
   2  -1  11 1119.36   43.58
   2   1  12  409.29   27.30
   2  -1  12  412.89   23.59
   2  -1  12  434.86   25.15
   2  -1  13 1415.60   60.82
   2   1  13 1484.40   52.59
   2  -1  13 1334.00   31.18
   2  -1  14   64.52   13.26
  -2  -2  13  251.71   21.82
  -2  -2  12  722.62   39.99
  -2  -2  11  119.36   20.39
  -2   2  11  132.04   14.33
  -2  -2  11  114.74   17.05
  -2  -2  10 1459.55   57.49
   2   2 -10 1573.65   54.44
  -2  -2   9  136.57   19.60
  -2   2   9  155.74   14.49
  -2  -2   9  165.43   20.06
   2   2  -9  173.38   19.21
  -2  -2   8 1297.31   52.57
  -2  -2   8 1377.96   54.74
   2   2  -8 1259.31   52.06
  -2  -2   7  122.54   16.24
  -2   2   7  100.28   10.77
  -2  -2   7   99.69   14.82
  -2   2   7  100.48   11.89
   2   2  -7  103.66   14.99
   2  -2  -7  117.32   10.58
  -2  -2   6 1685.17   56.73
   2   2  -6 1729.97   39.39
   2  -2  -6 1641.82   44.05
  -2   2   6 1561.31   45.79
  -2  -2   6 1700.75   57.98
  -2   2   6 1677.04   43.01
   2   2  -6 1635.87   36.88
   2   2  -5  115.06   12.48
  -2  -2   5  106.98   14.42
  -2   2   5  122.27   13.52
  -2  -2   5  115.07   14.93
   2  -2  -5  120.77   12.46
  -2   2   5  112.32   11.11
   2   2  -5  118.66   11.77
   2  -2  -4 5142.65   54.00
   2   2  -4 5322.65   83.84
   2   2  -4 5656.10   84.46
  -2   2   4 5387.14   77.96
  -2  -2   4 5558.03   98.97
  -2   2   4 5423.97   85.68
   2  -2  -4 5548.51   83.24
   2  -2  -3  433.60   20.36
   2   2  -3  398.21   24.38
  -2   2   3  421.53   21.74
   2   2  -3  413.37   23.37
  -2   2   3  410.33   24.12
   2   2  -3  416.34   26.31
   2   2  -2 3130.46   66.88
   2  -2  -2 3065.44   57.26
   2   2  -2 2855.07   61.46
  -2   2   2 2838.52   57.90
  -2   2   2 2975.23   64.73
  -2  -2   2 3027.28   69.67
   2   2  -2 2994.26   68.33
   2  -2  -1 1468.99   41.70
   2   2  -1 1531.41   44.44
  -2   2   1 1416.74   41.62
   2   2  -1 1451.36   45.90
  -2  -2   1 1468.66   47.63
   2  -2  -1 1481.62   45.59
   2  -2   0 5423.78   82.24
   2   2   0 5346.84   82.50
  -2   2   0 5126.42   78.95
   2  -2   0 5104.48   86.54
  -2  -2   0 5320.44   86.92
   2   2   0 5147.03   84.64
   2  -2   1 1355.21   44.06
   2   2   1 1511.06   42.52
  -2   2  -1 1396.09   43.36
   2  -2   1 1426.42   46.77
  -2  -2  -1 1379.56   43.24
   2   2   1 1488.90   44.67
  -2   2  -2 2906.74   60.28
   2  -2   2 2916.13   63.32
  -2  -2  -2 3020.88   64.21
   2   2   2 2821.45   61.84
   2  -2   2 2878.04   67.54
  -2   2  -3  357.82   21.12
   2  -2   3  400.33   24.52
  -2  -2  -3  381.90   22.70
   2   2   3  319.95   22.37
  -2   2  -4 5115.22   77.73
   2  -2   4 5327.42   91.19
  -2  -2  -4 5161.91   80.37
   2   2   5  122.11   11.14
  -2   2  -5  124.38   11.02
   2  -2   5  134.47   14.28
   2   2   5  112.05   11.98
  -2   2  -6 1602.82   32.56
   2  -2   6 1651.27   53.35
   2   2   6 1793.08   43.16
   2   2   6 1734.21   45.45
   2  -2   7   87.62   12.58
   2   2   7  110.96   10.79
   2   2   7  113.27   11.13
   2  -2   7  115.67   16.08
   2  -2   8 1215.61   48.35
   2   2   8 1228.93   35.86
   2  -2   8 1178.90   49.88
   2   2   8 1147.18   34.04
   2  -2   8 1203.96   50.40
   2  -2   9  156.74   18.51
   2   2   9  153.77   13.56
   2  -2   9  128.72   17.47
   2   2   9  138.40   10.53
   2  -2   9  151.56   18.11
   2  -2  10 1255.06   53.04
   2   2  10 1192.28   38.36
   2  -2  10 1242.90   51.74
   2  -2  10 1327.29   53.84
   2  -2  11  156.52   20.18
   2   2  11  132.73   14.09
   2  -2  11  130.74   18.04
   2  -2  12  749.48   44.66
   2   2  12  632.00   32.94
   2  -2  12  620.84   35.60
   2  -2  12  761.74   38.49
   2   2  13  277.28   21.17
   2  -2  13  296.23   31.21
   2  -2  13  239.67   19.28
   2  -2  13  289.82   22.01
   2   2  14  541.47   30.93
   2  -2  14  539.24   44.72
   2  -2  14  558.44   21.37
   2  -2  14  455.62   20.28
  -2  -3  15  159.29   16.96
  -2  -3  14  196.83   21.24
  -2  -3  13  327.00   29.55
  -2  -3  12   80.15   18.86
  -2   3  12   99.68   12.40
  -2   3  11 1176.12   40.54
  -2  -3  11 1242.80   58.47
  -2  -3  10    2.88    6.46
  -2   3  10    3.99    3.64
  -2  -3  10    5.29    5.93
   2   3 -10   11.25    7.41
  -2   3   9 1498.94   43.80
  -2  -3   9 1652.67   65.69
   2   3  -9 1718.65   65.33
  -2  -3   8  268.42   25.98
  -2   3   8  215.37   16.73
  -2  -3   8  248.57   25.48
   2   3  -8  257.45   26.11
  -2  -3   7 2345.07   74.75
   2   3  -7 2260.85   46.73
  -2   3   7 2132.38   51.07
   2   3  -7 2238.32   43.21
  -2  -3   7 2252.88   73.46
   2  -3  -7 2424.62   47.93
   2   3  -7 2414.10   76.83
  -2  -3   6  186.63   20.83
   2   3  -6  180.20   15.93
  -2  -3   6  191.49   21.15
   2  -3  -6  192.06   15.58
  -2   3   6  186.95   15.17
   2   3  -6  210.13   16.79
   2   3  -5 3157.85   71.07
  -2  -3   5 2806.02   76.51
   2   3  -5 3122.59   66.67
  -2   3   5 2603.81   56.44
   2  -3  -5 3016.11   62.71
  -2  -3   5 2774.78   76.55
  -2  -3   4   65.32   11.80
   2  -3  -4   81.76    6.93
   2   3  -4   68.20   10.75
   2   3  -4   90.76   11.62
  -2   3   4   66.24    9.32
   2  -3  -4   76.30   10.65
   2   3  -4   74.94   12.50
   2   3  -3 8482.62  119.21
   2   3  -3 8665.08  116.04
  -2  -3   3 8627.04  127.68
   2   3  -3 8716.48  129.40
   2   3  -2  293.46   22.09
   2  -3  -2  282.14   18.81
  -2   3   2  230.52   18.26
  -2  -3   2  267.09   22.88
   2   3  -2  268.80   22.14
   2  -3  -1 4883.19   80.78
   2   3  -1 5176.67   90.45
  -2   3   1 5071.01   83.39
   2  -3  -1 5084.96   90.06
  -2  -3   1 5006.99   92.91
   2   3  -1 4856.42   92.87
   2  -3   0  681.24   31.34
  -2  -3   0  641.65   33.41
   2   3   0  637.34   32.27
  -2   3   0  625.40   30.66
   2  -3   1 5061.50   87.14
  -2  -3  -1 5212.85   91.56
  -2   3  -1 4954.91   86.20
   2  -3   2  222.42   20.08
   2   3   2  202.61   17.64
  -2  -3  -2  205.22   18.24
  -2   3  -2  264.29   20.38
   2  -3   3 8509.08  118.15
  -2   3  -3 8584.50  113.03
   2  -3   4   89.21   11.59
   2   3   4   78.84   11.26
  -2  -3  -4   80.04   10.95
  -2   3  -4   88.85   11.53
   2  -3   5 2779.99   70.91
  -2   3  -5 2868.26   61.16
  -2  -3  -5 2507.68   58.29
   2   3   5 2619.94   57.71
   2  -3   6  209.01   20.12
  -2   3  -6  248.30   16.98
  -2  -3  -6  209.04   14.83
   2   3   6  196.94   15.72
   2  -3   6  213.99   22.37
   2  -3   7 2300.35   69.11
  -2   3  -7 2454.23   39.90
   2   3   7 2270.99   50.30
   2  -3   7 2315.33   74.36
   2  -3   8  262.64   23.89
   2   3   8  294.99   18.17
   2   3   8  251.07   15.96
   2  -3   8  253.46   25.16
   2   3   9 1562.62   42.61
   2  -3   9 1595.12   63.91
   2  -3  10   11.56    8.70
   2   3  10    1.92    2.81
   2  -3  10    9.10    6.81
   2  -3  10    7.41    7.51
   2  -3  11 1097.81   56.18
   2   3  11 1101.84   36.51
   2  -3  11 1073.35   53.20
   2  -3  11 1244.12   56.89
   2  -3  12  101.13   18.66
   2   3  12  117.92   12.64
   2  -3  12   93.56   15.74
   2  -3  12  133.10   19.10
   2  -3  13  391.79   36.30
   2   3  13  363.88   23.14
   2  -3  13  282.67   25.38
   2  -3  13  351.67   29.14
   2  -3  14  182.58   28.65
   2   3  14  215.93   18.64
   2  -3  14  199.98   19.84
   2  -3  14  225.45   19.67
   2  -3  15  250.45   15.91
  -2  -4  14   64.68   15.27
  -2  -4  13   77.03   15.53
  -2   4  13   59.30   10.46
  -2   4  12  477.84   26.69
  -2  -4  12  479.12   40.27
  -2  -4  11   -2.02    8.25
  -2   4  11    6.52    4.26
  -2  -4  11   16.37   11.01
   2   4 -11   -0.60    9.10
  -2  -4  10  876.09   53.18
  -2   4  10  845.81   34.06
  -2  -4  10  842.23   51.37
   2   4 -10  884.72   51.22
  -2   4   9   41.36    8.21
  -2  -4   9   15.38    8.98
  -2  -4   9   39.87   13.19
   2   4  -9   55.48   11.68
  -2  -4   8  513.94   38.28
   2   4  -8  473.68   20.32
  -2   4   8  468.23   25.35
   2   4  -8  437.76   18.63
  -2  -4   8  498.31   37.67
   2   4  -7   14.53    5.92
  -2   4   7   14.08    5.22
   2   4  -7   18.86    5.04
   2  -4  -7   13.43    3.86
  -2  -4   7   17.08    8.73
   2  -4  -7   11.82    4.25
  -2  -4   6 2995.88   86.57
   2   4  -6 3175.42   74.51
  -2   4   6 2822.49   61.74
   2   4  -6 3123.14   73.06
   2  -4  -6 3059.36   63.02
  -2  -4   6 2922.56   87.54
   2   4  -5   26.71    7.70
  -2  -4   5   21.04    8.29
   2   4  -5   31.56    7.56
  -2   4   5   27.86    6.75
   2  -4  -5   28.30    6.32
   2   4  -5   26.65    8.56
  -2  -4   5   25.14    7.93
   2  -4  -4 2970.63   47.50
   2   4  -4 2894.10   75.54
  -2  -4   4 2850.15   79.60
   2   4  -4 2879.07   72.85
  -2  -4   4 2680.96   79.66
   2   4  -4 2888.56   82.94
   2  -4  -3 2886.96   59.92
  -2   4   3 2639.02   61.71
  -2  -4   3 2636.92   77.11
   2   4  -3 2718.85   71.72
  -2  -4   3 2753.18   77.82
   2   4  -3 2741.32   78.74
   2  -4  -1  236.88   20.39
   2   4  -1  213.05   19.82
  -2   4   1  198.21   18.81
  -2  -4   1  216.99   21.35
   2   4  -1  234.98   21.80
   2   4   0 6595.50  108.23
   2  -4   0 6264.04  104.24
  -2   4   0 6245.03  101.45
  -2  -4   0 6142.79  109.90
   2   4   0 6314.69  110.15
   2  -4   1  208.44   20.98
  -2   4  -1  259.85   20.63
  -2  -4  -1  235.13   21.18
   2   4   1  249.88   21.05
   2  -4   3 2648.82   73.03
  -2   4  -3 2659.10   69.36
  -2  -4  -3 2903.91   68.72
   2   4   3 2692.29   67.12
   2  -4   4 2734.41   75.51
   2  -4   4 2786.24   82.27
  -2   4  -4 2958.99   73.42
  -2  -4  -4 2809.60   65.39
   2   4   4 2770.34   66.19
  -2   4  -5   23.00    7.52
   2  -4   5   31.77    8.77
  -2  -4  -5   18.94    5.46
   2   4   5   25.29    6.23
  -2   4  -6 3057.22   67.90
   2  -4   6 3025.71   82.80
   2   4   6 2857.50   63.43
   2  -4   6 2921.12   87.19
   2  -4   7    9.49    7.64
  -2   4  -7   16.44    5.49
   2   4   7   12.84    4.50
   2  -4   7    8.58    4.33
  -2   4  -8  419.38   15.24
   2  -4   8  504.55   36.08
   2  -4   8  452.56   35.28
   2   4   8  426.78   22.54
   2  -4   9   47.82   10.81
   2  -4   9   43.52   11.77
   2   4   9   32.49    5.04
   2   4  10  803.01   32.21
   2  -4  10  834.30   50.25
   2  -4  10  807.25   49.30
   2   4  11    1.49    3.75
   2  -4  11    3.95    6.87
   2  -4  11    2.34    7.90
   2  -4  12  433.87   39.94
   2   4  12  428.23   24.72
   2  -4  12  420.89   36.14
   2  -4  12  511.24   40.58
   2  -4  13   57.40   14.55
   2   4  13   48.94    8.91
   2  -4  13   75.61   16.39
   2  -4  13   70.30   15.70
   2  -4  14   73.00   18.39
   2   4  14   69.78   10.68
   2  -4  14   50.73   14.34
   2  -4  14   69.24   14.77
   2  -4  15   51.56   10.65
  -2  -5  14   65.21   18.00
  -2  -5  13   57.35   21.01
  -2  -5  12   37.15   14.61
  -2  -5  11  952.79   62.42
  -2   5  11  915.14   37.89
  -2  -5  11  984.93   60.29
   2   5 -11 1077.01   61.67
  -2   5  10   13.53    4.99
  -2  -5  10   12.10    9.61
   2   5 -10    9.43    6.57
  -2  -5  10   13.92    9.73
  -2  -5   9 1007.52   59.59
  -2   5   9  923.37   38.51
  -2  -5   9  956.89   56.59
  -2  -5   8  197.97   27.16
   2   5  -8  244.58   20.12
   2   5  -8  253.33   19.43
  -2   5   8  214.63   18.57
   2  -5  -8  132.20   10.15
  -2  -5   8  228.88   27.37
   2  -5  -8  123.44    8.73
  -2  -5   7 1452.31   66.84
  -2   5   7 1353.15   46.16
   2   5  -7 1224.39   51.42
   2  -5  -7 1558.02   43.79
   2  -5  -7 1261.89   39.78
   2   5  -6  196.67   21.39
  -2  -5   6  209.65   25.01
  -2   5   6  226.43   19.07
   2   5  -6  244.41   22.24
  -2  -5   6  216.54   26.30
   2  -5  -6  222.44   18.61
   2   5  -6  217.25   26.28
   2  -5  -6  207.63   18.24
   2   5  -5 3771.55   94.68
  -2   5   5 3484.04   74.63
  -2  -5   5 3449.48   98.12
   2   5  -5 3469.14   87.60
  -2  -5   5 3410.03   97.26
   2  -5  -5 3721.66   80.98
   2   5  -5 3634.69  103.94
   2  -5  -5 3497.24   79.14
  -2  -5   4  920.95   49.92
   2   5  -4  906.66   45.16
  -2   5   4  902.08   38.71
   2  -5  -4  962.68   30.53
  -2  -5   4  881.31   48.63
   2   5  -4  892.76   50.39
   2  -5  -4  978.93   43.28
  -2   5   3 6058.63  101.70
   2  -5  -3 5970.90   92.91
   2  -5  -3 6144.85  115.90
  -2  -5   3 6018.76  120.50
   2   5  -3 6310.83  117.79
  -2  -5   3 6111.09  123.96
   2   5  -3 6281.07  126.71
   2  -5  -2  473.11   28.31
   2   5  -2  471.04   31.80
  -2   5   2  459.53   28.80
  -2  -5   2  427.31   32.61
   2   5  -2  453.72   34.03
  -2   5   1 4184.79   89.49
   2  -5  -1 4364.30   89.62
  -2  -5   1 4288.19  100.21
   2   5  -1 4282.53   99.65
   2  -5   0 2031.73   62.83
  -2  -5   0 1900.13   65.17
   2   5   0 1820.61   63.45
   2  -5   1 4386.11   96.32
   2   5   1 4193.12   92.26
   2  -5   1 4239.88  100.92
  -2  -5  -1 4305.88   94.71
   2   5   1 4163.52   93.67
   2   5   2  504.70   31.85
   2  -5   2  549.04   33.70
  -2   5  -2  481.94   31.94
  -2  -5  -2  519.51   33.31
   2  -5   2  506.67   36.47
   2   5   2  494.18   32.00
   2  -5   3 5838.33  116.03
  -2   5  -3 6105.48  112.56
  -2  -5  -3 5984.43  107.49
   2  -5   3 5582.33  121.99
   2   5   3 5576.06  104.36
   2  -5   4 1090.28   51.49
  -2   5  -4 1071.20   46.54
  -2  -5  -4 1089.33   44.33
   2  -5   4  963.59   52.31
   2   5   4  956.76   43.29
   2  -5   5 3590.55   96.34
  -2   5  -5 3312.19   83.24
  -2  -5  -5 3694.40   77.28
   2   5   5 3571.56   80.36
   2  -5   5 3527.46  100.21
  -2  -5  -6  183.83   16.47
   2   5   6  198.90   18.81
   2  -5   6  215.37   24.47
   2  -5   7 1385.52   63.03
  -2   5  -7 1467.62   50.07
  -2  -5  -7 1226.32   35.95
   2  -5   7 1428.45   65.49
   2   5   7 1311.14   45.71
  -2   5  -8  226.47   17.53
   2  -5   8  233.66   26.19
   2   5   8  196.05   16.18
   2  -5   8  208.72   25.66
   2  -5   9  847.23   51.66
   2   5   9  763.12   27.07
   2  -5  10    6.22    6.11
   2  -5  10   13.76   10.41
   2   5  11  864.30   36.20
   2  -5  11  816.25   55.26
   2  -5  11  942.78   58.62
   2   5  12   32.67    6.47
   2  -5  12   55.61   15.78
   2  -5  13   80.28   18.07
   2   5  13  115.63   12.82
   2  -5  13  127.76   22.47
   2  -5  14   55.08   13.97
   2  -5  14   31.91   12.10
  -2   6  14  395.30   27.39
  -2  -6  14  454.64   46.39
  -2   6  13   51.67    9.56
  -2  -6  13   44.27   16.52
  -2   6  12  187.35   17.68
  -2  -6  12  214.66   30.68
   2   6 -11   18.27   13.95
  -2  -6  11   23.21   13.15
  -2  -6  10  879.75   59.69
   2   6 -10  966.50   63.68
   2   6  -9   41.26    8.40
   2   6  -9   47.58    8.58
  -2  -6   9   35.86   14.12
  -2  -6   9   19.58    9.19
   2   6  -8  852.56   43.15
  -2  -6   8  716.73   53.79
   2   6  -8  880.38   42.64
   2  -6  -8  771.55   27.75
   2  -6  -8  618.54   27.35
   2   6  -7   53.67   11.90
  -2  -6   7   38.57   13.79
   2   6  -7   50.64   11.21
   2  -6  -7   52.83    9.31
   2   6  -7   49.24   14.37
   2  -6  -7   43.87    8.83
  -2  -6   7   36.18   12.81
  -2  -6   6 1156.77   62.45
   2   6  -6 1177.35   54.47
   2   6  -6 1213.14   54.35
  -2  -6   6 1154.84   61.85
   2  -6  -6 1158.23   46.47
   2   6  -6 1195.30   64.63
   2  -6  -6 1072.64   45.68
   2   6  -5  591.85   40.77
  -2  -6   5  609.75   43.83
   2  -6  -5  664.10   37.69
  -2  -6   5  596.91   44.08
   2   6  -5  635.65   45.86
   2  -6  -5  626.23   37.12
   2   6  -4 5549.54  120.97
  -2  -6   4 5455.03  125.77
   2  -6  -4 5310.22   80.13
   2   6  -4 5321.25  128.70
  -2  -6   4 5194.19  126.55
   2  -6  -4 5205.80  107.36
   2   6  -3 1399.56   60.17
  -2  -6   3 1436.83   63.35
   2  -6  -3 1466.27   50.79
  -2   6   3 1352.82   53.77
   2   6  -3 1389.89   64.42
  -2  -6   3 1447.69   65.63
  -2  -6   2 2547.64   87.74
   2  -6  -2 3098.81   77.30
  -2   6   2 2689.41   76.04
   2   6  -2 2581.47   79.28
  -2  -6   2 2748.83   87.31
   2  -6  -2 2968.81   85.69
   2   6  -2 2837.75   89.46
  -2   6   1  426.73   29.85
   2  -6  -1  357.13   29.83
   2   6  -1  349.25   31.30
  -2  -6   1  369.96   31.78
   2  -6  -1  365.08   31.81
   2   6  -1  403.43   33.17
   2  -6   0 6134.63  115.74
   2   6   0 5888.29  119.95
  -2   6   0 5758.42  111.67
  -2  -6   0 5605.67  120.54
   2  -6   0 5764.67  125.35
  -2   6  -1  385.03   30.42
   2   6   1  404.48   30.72
   2  -6   1  427.06   31.79
  -2  -6  -1  421.36   32.44
   2  -6   1  420.87   33.82
   2   6   1  395.86   32.04
   2   6   2 3016.64   81.31
   2  -6   2 2769.98   84.50
  -2   6  -2 3054.03   83.40
  -2  -6  -2 3055.35   84.98
   2  -6   2 2983.82   91.79
   2   6   2 2926.16   83.84
  -2   6  -3 1529.21   60.80
   2  -6   3 1502.49   63.64
   2  -6   3 1364.82   65.22
   2   6   3 1439.88   58.46
   2  -6   4 4590.70  118.65
   2   6   4 4325.40  101.28
   2  -6   5  601.65   41.88
  -2   6  -5  661.11   40.13
  -2  -6  -5  587.81   33.88
   2  -6   5  681.28   45.70
   2   6   5  637.03   37.01
   2  -6   6 1139.01   61.09
  -2   6  -6 1189.13   53.50
  -2  -6  -6 1007.99   41.99
   2  -6   6 1219.58   62.95
   2   6   6 1060.90   45.65
   2  -6   7   50.72   15.96
  -2   6  -7   57.99   12.06
  -2  -6  -7   44.64    8.93
   2   6   7   54.58    9.71
   2  -6   7   55.64   15.22
   2  -6   8  924.97   55.27
   2   6   8  766.39   34.49
  -2   6  -9   47.57    8.17
   2  -6   9   41.09   12.97
   2  -6   9   40.55   14.49
   2   6   9   31.57    6.82
   2  -6  10  831.01   55.33
   2  -6  10  817.45   56.47
   2  -6  11   21.78   11.34
   2   6  12  184.66   17.49
   2  -6  12  126.21   24.11
   2  -6  12  177.31   28.15
   2   6  13   48.12    9.02
   2  -6  13   38.48   13.39
   2  -6  13   31.36   15.75
   2  -6  14  501.37   45.72
  -2   7  13 1079.24   45.92
  -2  -7  13 1037.92   76.60
  -2   7  12   22.64    8.39
  -2  -7  12   19.11   13.19
  -2  -7  11  226.13   35.59
  -2   7  11  268.79   23.60
  -2  -7  11  257.19   34.79
   2   7 -11  328.06   38.54
   2   7 -10  136.35   12.47
  -2   7  10  149.15   17.49
   2   7 -10  130.91   13.08
  -2  -7  10  121.49   24.54
  -2   7   9 1627.14   60.01
   2   7  -9 1866.25   64.14
  -2  -7   9 1826.06   91.16
   2   7  -9 1746.70   61.11
  -2  -7   9 1711.28   88.14
  -2  -7   8  355.61   39.41
  -2   7   8  327.68   26.45
   2   7  -8  358.30   30.93
   2   7  -8  343.22   29.39
  -2  -7   8  335.07   37.32
   2  -7  -8  309.33   20.04
   2   7  -8  327.51   36.42
   2  -7  -8  277.06   19.06
   2   7  -7 1510.00   67.14
  -2  -7   7 1383.14   74.59
  -2   7   7 1477.26   56.11
  -2  -7   7 1370.74   72.85
   2  -7  -7 1444.25   51.98
   2  -7  -7 1466.58   53.28
   2   7  -7 1491.69   78.17
  -2  -7   6  208.32   29.61
  -2   7   6  197.30   21.52
   2   7  -6  204.72   25.89
   2  -7  -6  214.34   21.86
  -2  -7   6  195.19   28.32
   2  -7  -6  186.14   21.10
   2   7  -6  206.56   30.09
  -2   7   5 2547.16   74.86
   2   7  -5 2447.97   90.41
  -2  -7   5 2632.35   95.09
   2   7  -5 2555.17   96.99
  -2  -7   5 2521.75   95.75
  -2   7   4 1576.17   60.57
   2   7  -4 1650.95   70.35
  -2  -7   4 1703.28   74.98
   2  -7  -4 1636.55   49.47
   2  -7  -4 1674.30   64.23
  -2  -7   4 1589.20   74.61
   2   7  -4 1574.82   74.72
  -2  -7   3 1515.64   70.20
   2   7  -3 1605.91   68.32
  -2   7   3 1432.10   58.32
   2  -7  -3 1574.70   54.93
  -2  -7   3 1509.11   71.40
   2   7  -3 1569.65   72.64
   2  -7  -3 1548.44   64.87
   2   7  -2  415.50   34.82
   2  -7  -2  439.56   32.21
  -2  -7   2  402.85   34.85
  -2   7   2  410.74   31.64
   2   7  -2  391.72   36.44
  -2  -7   2  391.09   37.22
   2  -7  -1 1720.53   64.29
  -2   7   1 1541.84   62.77
   2   7  -1 1453.47   62.56
   2   7  -1 1626.88   71.49
  -2  -7   1 1459.92   68.45
   2  -7  -1 1658.11   67.96
  -2   7   0  379.52   32.30
   2  -7   0  467.32   35.60
   2   7   0  373.97   33.10
  -2  -7   0  388.46   34.22
   2   7   0  431.53   36.27
   2  -7   0  415.49   36.66
  -2   7  -1 1609.03   64.43
   2   7   1 1534.36   64.83
  -2  -7  -1 1673.21   68.59
   2   7   1 1518.52   66.71
   2  -7   1 1546.79   68.25
  -2   7  -2  434.06   33.50
   2   7   2  357.80   31.28
   2  -7   2  396.79   34.25
   2   7   2  353.54   32.25
   2  -7   2  387.75   35.03
   2   7   3 1562.30   61.31
   2  -7   3 1529.84   66.77
  -2   7  -3 1554.15   65.87
  -2  -7  -3 1444.69   62.69
   2   7   3 1550.52   63.33
   2  -7   3 1534.49   70.45
   2  -7   4 1454.97   69.89
   2   7   4 1667.75   63.27
  -2   7  -4 1613.75   67.86
  -2  -7  -4 1610.91   63.91
   2  -7   4 1643.93   74.62
   2   7   4 1604.83   63.81
   2   7   5 2254.53   72.91
   2  -7   5 2403.91   87.45
  -2   7  -5 2292.70   81.04
   2  -7   5 2303.19   89.35
   2   7   5 2185.59   73.28
   2   7   6  232.32   23.00
   2  -7   6  235.45   29.79
  -2   7  -6  250.53   26.43
  -2  -7  -6  210.08   23.21
   2   7   6  233.55   23.04
   2  -7   6  219.71   29.43
   2   7   7 1333.11   56.16
   2  -7   7 1438.83   71.77
  -2   7  -7 1482.69   62.52
   2   7   7 1368.05   53.78
   2  -7   7 1510.49   76.65
   2   7   8  346.56   27.82
   2  -7   8  308.39   34.77
  -2   7  -8  351.47   29.67
   2  -7   8  332.10   37.57
   2   7   8  287.35   23.42
  -2   7  -9 1801.66   57.26
   2   7   9 1886.15   64.73
   2  -7   9 1769.15   83.61
  -2   7 -10  139.90   10.66
   2   7  10  147.09   18.24
   2  -7  10  143.19   26.12
   2   7  11  233.72   23.48
   2  -7  11  225.44   33.43
   2   7  12    7.05    6.62
   2  -7  12   24.46   11.85
   2   7  13  979.43   42.33
   2   7  13 1128.52   47.60
   2  -7  13 1170.45   74.60
  -2   8  13   10.63    8.09
  -2  -8  12 1194.43   80.15
  -2   8  12 1133.55   51.98
  -2  -8  11  257.66   37.70
  -2   8  11  251.32   25.41
  -2   8  10  437.50   31.91
   2   8 -10  431.35   29.85
   2   8 -10  340.42   28.26
  -2  -8  10  363.07   46.40
  -2  -8   9   82.94   22.88
   2   8  -9  109.95   18.40
  -2   8   9  120.51   17.34
   2  -8  -9  122.11    8.54
   2  -8  -9   38.29    5.02
   2   8  -9   95.63   23.64
  -2  -8   9  110.95   23.79
  -2   8   8 1573.44   62.03
  -2  -8   8 1619.40   87.17
   2   8  -8 1677.13   73.06
   2   8  -8 1756.87   72.71
   2  -8  -8 1565.89   52.77
  -2  -8   8 1553.83   85.40
   2   8  -8 1753.84   89.33
   2   8  -7  661.98   47.51
  -2  -8   7  661.49   55.05
  -2   8   7  669.24   40.73
  -2  -8   7  612.82   52.95
   2  -8  -7  661.27   38.91
   2  -8  -7  654.23   38.52
   2   8  -7  683.88   55.97
  -2   8   6 3558.57   94.98
   2   8  -6 3502.50  109.23
   2  -8  -6 3601.43   96.22
   2   8  -6 3311.90  122.78
   2  -8  -6 3327.96   93.60
  -2  -8   6 3379.51  121.42
  -2   8   5  973.31   50.66
   2   8  -5  949.82   57.74
  -2  -8   5  909.22   61.74
  -2  -8   5  904.83   61.94
   2   8  -5  997.17   64.43
   2  -8  -5  971.71   53.47
  -2   8   4 1270.33   57.93
   2   8  -4 1128.59   62.29
   2  -8  -4 1115.54   46.38
  -2  -8   4 1240.42   67.15
  -2  -8   4 1099.70   66.17
   2   8  -4 1102.76   67.31
   2  -8  -4 1161.90   58.65
  -2   8   3   19.58    8.34
   2   8  -3   14.19    7.28
   2  -8  -3   20.08    8.77
  -2  -8   3   14.83    7.56
   2  -8  -3    8.92    7.17
  -2  -8   3   21.84    9.30
   2  -8  -2 1107.21   52.56
   2   8  -2  951.45   57.81
  -2   8   2 1071.09   53.68
  -2  -8   2  982.50   58.31
   2  -8  -2 1099.42   57.97
  -2  -8   2  951.34   60.47
   2   8  -2  948.62   59.29
   2  -8  -1  204.16   23.39
  -2   8   1  197.07   24.80
   2   8  -1  159.06   23.67
   2   8  -1  181.36   25.57
   2  -8  -1  167.07   22.72
  -2  -8   1  196.06   26.86
   2  -8   0 2694.56   90.11
  -2   8   0 2539.73   86.27
   2   8   0 2477.86   86.79
   2   8   0 2451.64   90.26
  -2   8  -1  167.11   25.16
   2  -8   1  238.00   26.62
   2   8   1  208.22   25.47
  -2  -8  -1  201.88   26.04
   2   8   1  168.97   24.61
   2  -8   1  206.85   28.10
  -2   8  -2 1141.99   58.62
   2  -8   2 1178.64   61.49
   2   8   2 1106.90   57.23
  -2  -8  -2 1103.68   58.96
   2   8   2 1076.27   59.26
   2  -8   2 1056.94   60.63
  -2   8  -3    7.64    6.35
   2   8   3   20.33    7.09
   2  -8   3   16.50    7.22
   2   8   3   12.97    8.23
   2  -8   3   25.82   11.57
  -2  -8  -3   33.44    9.08
   2  -8   4 1244.03   68.62
   2   8   4 1124.65   56.45
  -2   8  -4 1264.53   61.53
  -2  -8  -4 1141.63   58.20
   2   8   4 1148.89   58.26
   2  -8   4 1192.61   69.77
   2  -8   5  990.98   60.46
   2   8   5  939.63   51.45
  -2   8  -5 1059.75   57.08
  -2  -8  -5 1003.54   52.20
   2   8   5  971.22   52.55
   2  -8   5 1034.44   64.88
   2  -8   6 3365.16  114.91
   2   8   6 3141.27   93.08
  -2   8  -6 3158.71   99.60
   2   8   6 3106.11   92.40
   2  -8   6 3363.17  118.40
   2   8   7  689.05   42.39
   2  -8   7  664.18   52.55
  -2   8  -7  729.54   46.86
   2   8   7  633.63   40.93
   2  -8   7  714.67   55.16
   2   8   8 1661.69   65.56
  -2   8  -8 1656.99   67.83
   2  -8   8 1642.21   86.18
  -2   8  -9  151.33   19.48
   2   8   9  121.84   20.59
   2  -8   9  131.37   23.58
   2   8   9  136.11   17.39
   2  -8   9  138.74   25.19
   2  -8  10  433.88   51.15
   2   8  10  537.21   37.08
   2  -8  10  509.20   51.55
   2   8  11  269.91   25.53
   2  -8  11  277.76   37.93
   2   8  12 1037.18   51.42
   2  -8  12 1055.96   74.79
   2   8  13    2.96    9.32
  -2   9  13  748.78   47.29
  -2   9  12  144.40   20.52
  -2  -9  12  109.76   27.09
   2   9 -11 1094.05   39.43
   2   9 -11 1018.47   39.35
  -2   9  11 1162.55   55.98
  -2  -9  11 1178.46   83.95
  -2   9  10   79.61   17.33
   2   9 -10  101.60   17.64
   2   9 -10   74.22   22.10
  -2  -9  10   68.71   23.99
   2   9  -9  876.84   54.07
  -2   9   9  852.91   48.65
   2   9  -9  724.72   48.90
   2  -9  -9  590.72   27.45
   2  -9  -9  555.95   27.78
  -2  -9   9  832.07   65.33
   2   9  -9  837.71   66.50
  -2  -9   8   17.20   12.46
   2   9  -8   25.39   12.25
   2   9  -8   19.92    8.00
  -2   9   8   36.92    9.84
   2  -9  -8   41.26   10.41
   2   9  -8   29.66   14.32
   2  -9  -8   21.64    8.73
  -2  -9   8   33.46   17.15
   2   9  -7 2275.24   92.70
  -2   9   7 2176.89   79.07
   2  -9  -7 2453.58   80.76
  -2  -9   7 2120.28  100.61
   2   9  -7 2293.42  105.83
  -2   9   6  185.54   23.69
   2   9  -6  166.25   26.78
  -2  -9   6  139.18   27.82
   2  -9  -6  172.41   24.22
  -2  -9   6  152.57   29.01
   2  -9  -6  179.16   23.18
   2   9  -6  176.63   29.21
  -2   9   5 1680.80   70.53
  -2  -9   5 1755.88   87.83
   2   9  -5 1508.15   75.57
  -2  -9   5 1583.11   85.08
   2  -9  -5 1578.16   72.49
  -2   9   4  343.90   33.34
   2   9  -4  394.68   39.13
  -2  -9   4  426.99   42.53
   2  -9  -4  348.61   28.17
   2   9  -4  407.96   42.40
   2  -9  -4  380.10   36.81
  -2  -9   4  354.36   40.03
   2   9  -3  569.47   46.86
  -2   9   3  576.45   41.57
  -2  -9   3  536.42   45.51
   2  -9  -3  632.85   39.04
   2   9  -3  579.06   51.25
  -2  -9   3  539.25   48.99
   2  -9  -3  641.08   47.33
  -2   9   2   21.10   10.11
   2   9  -2   20.19   11.03
  -2  -9   2    6.12    7.06
   2   9  -2    9.05    7.53
   2  -9  -2   15.18    9.24
   2  -9  -1  753.19   49.55
   2   9  -1  750.63   51.13
  -2   9   1  763.43   48.90
  -2  -9   1  750.27   54.69
   2   9  -1  724.63   53.83
   2  -9  -1  775.29   53.29
  -2   9   0  102.67   19.46
   2  -9   0   93.47   19.28
   2   9   0   92.02   19.48
   2   9   0   96.47   18.65
   2  -9   0  118.78   21.97
  -2  -9   0  109.76   20.64
  -2   9  -1  701.39   50.31
   2  -9   1  799.93   52.83
   2   9   1  658.27   48.68
  -2  -9  -1  701.80   50.22
   2   9   1  730.50   51.99
   2  -9   1  774.13   54.98
  -2   9  -2   25.39    8.99
   2  -9   2   26.19   10.98
   2   9   2   16.75    8.39
   2   9   2   15.55    8.62
  -2  -9  -2   13.33    9.42
   2  -9   3  587.38   48.09
  -2   9  -3  689.71   47.39
   2   9   3  585.14   42.58
   2   9   3  558.61   43.60
   2  -9   3  634.43   50.74
   2  -9   4  397.98   39.84
   2   9   4  301.82   32.94
  -2   9  -4  372.49   36.00
  -2  -9  -4  251.87   29.95
   2   9   4  344.53   34.00
   2  -9   4  280.48   37.64
   2   9   5 1708.98   72.33
   2  -9   5 1731.45   87.43
  -2   9  -5 1565.82   74.33
  -2  -9  -5 1630.28   74.56
   2   9   5 1652.45   73.34
   2  -9   5 1762.23   89.22
   2  -9   6  212.95   32.33
   2   9   6  200.16   25.39
  -2   9  -6  202.22   26.86
  -2  -9  -6  162.59   23.48
   2   9   6  186.34   23.71
   2  -9   6  180.28   29.23
  -2   9  -7 1990.64   82.44
   2   9   7 1949.24   78.07
   2  -9   7 1997.62   97.74
   2   9   7 1885.72   74.62
   2   9   8   35.89   12.40
   2  -9   8   18.06   10.55
  -2   9  -8   34.70   11.71
  -2  -9  -8   10.58    6.45
   2   9   8   18.38    8.62
   2  -9   8   34.53   13.91
  -2   9  -9  753.20   48.34
   2   9   9  744.47   47.07
   2  -9   9  779.77   63.62
  -2   9 -10  100.22   16.18
   2   9  10  113.43   18.63
   2  -9  10  149.64   29.12
   2   9  11 1368.92   62.11
   2  -9  11 1308.87   87.01
   2   9  12  152.19   21.53
   2  -9  12  110.89   25.77
   2   9  13  669.42   49.43
  -2  10  12  711.39   47.40
   2  10 -11   37.90   10.48
  -2  10  11   46.31   13.82
   2  10 -11   47.97   12.93
   2  10 -11   44.71   24.09
  -2 -10  11   18.87   14.35
   2  10 -10 1211.43   64.78
  -2  10  10 1193.03   62.45
   2  10 -10 1171.71   61.08
  -2 -10  10 1023.84   84.75
   2  10 -10 1002.58   92.58
   2  10  -9   60.92   16.34
  -2  10   9   64.95   15.99
   2  10  -9   61.56   15.27
   2 -10  -9   58.12   10.38
   2  10  -9   85.41   26.41
  -2 -10   9   70.42   21.67
  -2  10   8  714.64   47.77
   2  10  -8  695.36   54.14
   2 -10  -8  697.02   43.92
  -2 -10   8  625.21   60.77
   2  10  -8  734.43   63.82
   2  10  -7  139.83   25.72
  -2  10   7  168.84   24.23
  -2 -10   7  155.23   31.50
   2 -10  -7  141.00   22.84
   2  10  -7  150.80   28.59
  -2 -10   7  127.12   29.31
   2 -10  -7  156.34   23.92
  -2  10   6 1296.71   65.40
  -2 -10   6 1350.99   84.03
   2  10  -6 1378.60   76.99
   2 -10  -6 1355.93   68.85
   2 -10  -6 1268.02   67.70
   2  10  -6 1312.74   84.22
  -2 -10   6 1176.86   79.95
   2  10  -5  386.69   40.97
  -2  10   5  464.39   39.52
  -2 -10   5  384.52   44.80
   2  10  -5  433.12   47.17
  -2  10   4 1582.65   75.65
   2  10  -4 1378.28   80.85
   2 -10  -4 1525.33   59.23
   2 -10  -4 1628.08   77.99
   2  10  -4 1473.42   87.66
  -2  10   3  177.56   24.62
   2  10  -3  161.91   29.33
   2 -10  -3  174.21   24.22
  -2 -10   3  143.78   26.63
  -2 -10   3  190.50   30.86
   2  10  -3  199.81   29.95
   2 -10  -3  178.37   27.93
  -2  10   2 1174.63   64.13
   2  10  -2 1098.05   67.47
   2 -10  -2 1008.63   56.06
   2 -10  -2 1213.38   69.31
  -2 -10   2 1077.10   70.78
   2  10  -2 1095.04   71.61
  -2  10   1   86.09   17.10
   2 -10  -1  102.44   19.99
   2  10  -1   70.16   20.04
   2 -10  -1   86.29   19.03
  -2 -10   1   77.44   20.05
   2  10  -1   66.87   19.45
   2 -10   0 1816.14   82.56
   2  10   0 1528.64   78.51
  -2  10   0 1710.34   78.54
   2  10   0 1703.92   86.75
   2 -10   0 1714.18   87.38
  -2 -10   0 1687.66   86.19
  -2  10  -1   89.33   18.06
   2  10   1   87.94   21.07
   2 -10   1   82.07   17.63
   2 -10   1  108.34   22.26
  -2 -10  -1   94.03   19.65
   2  10   1   80.85   18.55
   2 -10   2 1263.91   71.43
  -2  10  -2 1232.04   67.35
   2  10   2 1232.55   66.42
  -2 -10  -2 1074.99   66.08
   2  10   2 1173.57   68.43
   2 -10   2 1175.41   74.28
   2 -10   3  153.16   26.94
  -2  10  -3  200.92   28.58
   2  10   3  167.97   25.19
  -2 -10  -3  174.04   27.21
   2  10   3  182.97   26.04
   2 -10   3  190.28   29.00
   2 -10   4 1719.42   87.64
   2  10   4 1487.69   72.93
  -2  10  -4 1461.43   76.06
   2  10   4 1454.90   74.70
  -2  10  -5  432.63   41.11
   2  10   5  409.34   39.09
   2 -10   5  454.83   47.26
   2 -10   6 1388.34   84.06
   2  10   6 1390.77   68.56
  -2  10  -6 1433.94   73.87
   2 -10   6 1360.67   84.10
   2  10   6 1276.82   67.59
   2 -10   7  171.96   30.75
   2  10   7  165.25   24.92
  -2  10  -7  194.85   27.90
  -2 -10  -7   91.19   16.99
   2  10   7  167.16   23.91
   2 -10   7  181.11   31.63
  -2  10  -8  688.13   51.47
   2  10   8  667.63   46.87
   2 -10   8  649.08   61.61
   2  10   8  576.86   42.57
  -2  10  -9   95.96   18.89
   2  10   9   77.24   17.86
   2 -10   9   67.00   22.10
   2  10   9   60.39   13.88
  -2  10 -10 1182.22   58.72
   2  10  10 1043.85   62.99
   2 -10  10 1161.53   83.14
  -2  10 -11   44.41   11.72
   2  10  11   55.32   14.48
   2 -10  11   40.67   19.16
   2  10  12  633.37   48.06
  -2  11  12   56.18   19.34
   2  11 -11  541.05   43.99
   2  11 -10  -23.96   18.23
   2  11 -10    6.58    9.09
  -2 -11  10    4.57   19.08
   2  11 -10  -10.89   16.50
  -2  11   9  848.42   56.98
   2  11  -9  700.33   61.85
  -2 -11   9  890.76   74.83
   2 -11  -9  757.29   40.31
   2  11  -9 1017.07   79.19
  -2  11   8  136.84   22.36
   2  11  -8  113.41   26.05
   2 -11  -8  144.58   20.76
  -2 -11   8  121.82   28.71
   2  11  -7  897.29   66.32
  -2  11   7  955.08   59.29
   2 -11  -7  994.30   60.70
   2  11  -7  942.04   77.02
   2  11  -6   38.93   16.05
  -2  11   6   16.91    8.38
   2 -11  -6   23.49   10.50
   2  11  -6   17.10   15.68
  -2 -11   6   16.03   14.38
  -2  11   5  696.76   51.40
   2  11  -5  706.42   56.75
   2 -11  -5  715.14   55.79
  -2 -11   5  650.02   60.23
   2  11  -5  709.58   63.60
  -2  11   4  653.61   50.46
  -2 -11   4  520.77   57.66
   2 -11  -4  601.20   39.53
   2  11  -4  611.18   57.64
   2 -11  -4  640.41   52.84
  -2 -11   4  575.50   55.64
  -2  11   3 1515.05   76.83
   2 -11  -3 1529.86   70.38
   2  11  -3 1522.55   89.19
  -2 -11   3 1476.99   88.74
  -2  11   2  664.03   50.76
   2  11  -2  624.18   54.16
   2 -11  -2  654.80   48.66
   2 -11  -2  645.35   54.69
  -2 -11   2  659.25   57.38
   2  11  -2  643.85   56.70
   2  11  -1 1317.48   78.87
  -2  11   1 1309.08   71.92
   2 -11  -1 1157.52   65.91
   2  11  -1 1333.01   80.51
   2 -11  -1 1254.80   78.48
  -2 -11   1 1337.07   81.57
   2  11   0  168.76   27.35
  -2  11   0  178.68   28.45
   2 -11   0  180.81   26.90
   2 -11   0  159.70   27.84
   2  11   0  121.88   26.94
  -2 -11   0  156.89   28.55
   2  11   1 1126.15   72.47
  -2  11  -1 1382.24   75.33
  -2 -11  -1 1293.44   77.57
   2 -11   1 1312.77   80.91
   2  11   1 1103.35   75.85
   2  11   2  537.32   47.64
   2 -11   2  616.92   54.53
  -2  11  -2  577.58   47.88
  -2 -11  -2  527.20   49.66
   2 -11   2  593.99   54.77
   2  11   2  531.48   49.45
   2  11   3 1469.81   79.32
   2 -11   3 1508.72   91.02
   2  11   3 1369.75   77.95
   2 -11   4  644.27   57.59
   2  11   4  530.37   47.91
  -2 -11  -4  547.20   50.99
   2 -11   4  625.90   57.60
   2  11   4  579.22   49.81
   2 -11   5  653.66   59.56
   2  11   5  586.24   50.29
  -2 -11  -5  608.95   51.71
   2  11   5  656.87   51.49
   2 -11   5  673.26   59.80
  -2  11  -6   19.26   11.47
   2  11   6   24.12   11.01
   2 -11   6   12.26   10.77
   2  11   6   20.51   12.38
   2  11   7  846.59   57.28
   2  11   7  801.37   56.12
  -2  11  -8  136.83   24.59
   2  11   8  103.02   20.72
   2 -11   8  117.23   28.99
   2  11   8  100.28   21.01
   2  11   9  834.79   57.35
   2 -11   9  890.82   77.09
  -2  11 -10   19.53   10.71
   2  11  10   -0.48    8.16
   2 -11  10   13.66   16.74
  -2  11 -11  466.95   37.24
  -2  12  11    5.50   13.83
   2  12 -10  300.12   38.45
  -2  12  10  348.43   37.53
   2  12 -10  360.72   39.78
   2  12 -10  263.38   49.69
   2  12  -9   15.54   13.04
  -2  12   9   68.82   20.36
   2  12  -9   56.92   15.68
   2 -12  -9   14.21   10.60
   2  12  -9   76.86   28.52
  -2 -12   9   73.91   28.01
  -2  12   8  568.27   48.30
   2  12  -8  541.68   53.11
  -2 -12   8  456.16   56.66
   2 -12  -8  622.40   46.34
   2  12  -8  560.61   63.83
  -2  12   7  153.63   25.60
   2  12  -7  119.47   27.67
   2 -12  -7  139.21   26.44
   2  12  -7  175.61   32.18
  -2 -12   7  141.71   32.53
   2  12  -6  765.08   62.90
  -2  12   6  742.64   54.86
   2 -12  -6  844.42   62.11
  -2 -12   6  671.95   68.56
   2  12  -6  763.99   69.75
  -2  12   5   34.69   15.54
   2  12  -5   53.16   17.77
   2  12  -5   22.64   17.35
  -2 -12   5   37.60   16.88
   2  12  -4  890.49   68.91
   2  12  -4  917.02   74.59
  -2 -12   4  816.18   72.67
  -2  12   3  740.47   57.16
   2  12  -3  702.31   60.52
   2 -12  -3  803.96   56.08
   2  12  -3  691.63   63.77
   2 -12  -3  755.46   61.62
  -2 -12   3  657.11   63.23
  -2  12   2 2881.23  112.60
  -2 -12   2 2828.17  128.53
   2  12  -2 2867.16  124.87
   2 -12  -2 3028.22  122.98
   2  12  -1  224.48   35.80
  -2  12   1  334.01   38.42
   2 -12  -1  294.01   35.25
   2  12  -1  284.70   40.47
  -2 -12   1  267.46   41.41
   2  12   0 1065.69   72.37
  -2  12   0 1162.44   71.05
   2 -12   0 1177.06   79.12
  -2 -12   0 1005.83   74.61
   2  12   0 1072.10   74.47
   2  12   1  301.16   37.50
  -2  12  -1  307.77   39.89
   2 -12   1  314.24   42.12
   2  12   2 2596.86  111.98
  -2  12  -2 2663.79  109.83
   2 -12   2 2697.52  116.27
  -2 -12  -2 2513.73  112.80
   2 -12   2 2725.32  122.57
   2  12   2 2463.60  112.92
  -2  12  -3  697.64   58.32
  -2 -12  -3  711.69   60.71
   2  12   3  796.24   60.86
   2 -12   3  681.92   63.67
  -2  12  -4 1009.41   69.91
   2  12   4  868.21   64.54
   2 -12   4 1056.10   77.27
  -2  12  -5   22.53   14.30
   2  12   5   42.89   16.57
   2 -12   5   26.35   16.49
  -2  12  -6  803.39   62.44
   2 -12   6  738.21   68.13
   2  12   6  709.18   56.06
  -2  12  -7  161.49   28.78
   2  12   7  127.92   25.26
   2 -12   7  158.99   34.67
   2  12   7   97.08   20.85
  -2  12  -8  531.11   49.47
   2  12   8  486.36   48.55
   2 -12   8  501.70   59.19
   2  12   8  349.86   36.63
  -2  12  -9   61.25   17.83
   2  12   9   40.84   13.73
  -2  12 -10  382.57   38.97
   2  12  10  355.30   41.05
  -2  12 -11    1.40   12.23
   2  12  11   16.53   14.30
  -2  13  11  306.78   39.99
  -2  13  10   12.23   12.28
   2  13 -10   14.02   14.48
   2  13  -9  337.24   44.99
  -2  13   9  330.01   39.27
   2 -13  -9  299.48   31.41
   2  13  -9  394.83   59.36
  -2 -13   9  326.51   50.95
  -2  13   8   51.43   16.02
   2  13  -8   61.72   22.09
   2 -13  -8   61.30   18.13
   2  13  -8   35.41   22.09
  -2 -13   8   45.81   23.25
  -2  13   7  525.45   49.12
  -2 -13   7  448.89   57.97
   2 -13  -7  544.45   51.10
   2  13  -7  595.96   65.31
  -2  13   6   72.94   19.87
   2  13  -6   53.86   20.05
   2  13  -6   47.67   16.99
  -2 -13   6   70.23   28.35
   2  13  -5  807.29   69.11
  -2  13   5  885.69   64.44
  -2 -13   5  854.07   79.03
   2  13  -5  952.37   79.60
  -2  13   4  451.58   45.57
   2  13  -4  388.13   48.45
   2 -13  -4  406.57   35.59
  -2 -13   4  443.22   58.19
   2  13  -4  440.78   54.79
  -2  13   3 1778.03   91.64
   2  13  -3 1785.92   99.46
   2  13  -3 1801.17  106.79
  -2 -13   3 1756.08  108.21
   2  13  -2  622.28   60.87
  -2  13   2  682.82   57.24
   2 -13  -2  726.75   57.20
   2  13  -2  685.90   64.16
  -2  13   1 1168.40   75.96
   2 -13  -1 1056.92   75.39
   2  13  -1  893.83   74.12
  -2 -13   1 1111.25   83.95
   2 -13  -1 1079.15   79.68
  -2  13   0   57.51   18.62
   2 -13   0   68.19   20.19
   2  13   0   36.33   17.42
  -2 -13   0   46.81   20.97
   2 -13   0   69.95   23.00
   2  13   0   68.67   21.55
  -2  13  -1 1113.59   73.29
   2  13   1  951.88   75.41
   2 -13   1  935.50   68.78
   2  13   1 1128.39   78.51
   2  13   2  669.84   58.17
  -2  13  -2  722.80   59.17
   2  13   2  622.76   58.01
  -2  13  -3 1731.00   95.74
   2  13   3 1591.15   92.81
   2 -13   3 1755.95  104.92
   2  13   3 1581.44   93.42
  -2  13  -4  490.82   50.08
   2  13   4  388.70   47.91
   2 -13   4  506.34   56.28
   2  13   4  334.58   42.78
  -2  13  -5  895.53   67.16
   2  13   5  954.98   68.86
   2 -13   5  962.20   81.46
   2  13   5  862.98   67.77
  -2  13  -6   61.82   19.56
   2  13   6   53.67   17.66
   2 -13   6   56.57   21.09
   2  13   6   47.56   18.64
  -2  13  -7  520.93   53.81
   2  13   7  474.01   49.78
   2  13   7  332.15   37.50
   2 -13   7  510.57   60.20
  -2  13  -8   69.09   21.11
   2  13   8   50.77   15.43
   2 -13   8   25.59   21.45
   2  13   8   36.46   13.95
  -2  13  -9  340.68   42.31
   2  13   9  266.97   38.06
   2 -13   9  293.57   47.68
  -2  13 -10   49.39   20.54
   2  13  10   -3.38   13.87
   2  13  11  371.99   45.96
  -2  14   9   27.69   15.34
  -2  14   8  169.99   32.79
   2  14  -8  135.30   41.60
  -2 -14   8  125.53   34.86
  -2  14   7   73.45   20.47
   2  14  -7   46.77   24.59
   2 -14  -7   44.44   14.55
   2  14  -7   68.83   28.14
  -2  14   6  538.14   52.50
   2  14  -6  411.81   54.95
   2  14  -6  466.65   60.14
  -2  14   5  141.62   29.37
   2  14  -5  128.84   28.19
   2  14  -5  149.51   34.47
  -2  14   4 1832.56   96.76
   2  14  -4 1844.58  108.50
  -2 -14   4 1723.65  114.05
  -2  14   3  110.03   23.63
   2  14  -3   81.76   25.11
   2 -14  -3   87.60   20.29
   2  14  -3  110.50   28.39
  -2 -14   3  105.73   30.72
  -2  14   2  771.85   63.82
   2  14  -2  713.79   65.36
  -2 -14   2  633.87   69.94
   2  14  -2  706.13   69.16
  -2  14   1  178.04   30.52
   2 -14  -1  210.31   34.52
   2  14  -1  158.22   32.00
   2  14  -1  184.25   35.65
   2 -14   0 1792.19  101.82
  -2  14   0 1774.03   99.51
   2  14   0 1691.33  103.07
  -2  14  -1  197.21   32.92
   2  14   1  165.32   31.47
   2  14   1  172.92   33.20
   2  14   2  595.28   61.97
  -2  14  -2  740.87   66.13
   2 -14   2  719.39   70.40
   2  14   2  685.17   63.44
  -2  14  -3  113.77   25.35
   2  14   3  113.32   25.98
   2 -14   3  133.26   29.97
   2  14   3   96.15   23.26
  -2  14  -4 1780.77  101.64
   2 -14   4 1593.03  108.90
   2  14   4 1519.24   92.12
  -2  14  -5  142.63   30.68
   2  14   5  120.48   25.68
   2  14   5  139.60   30.08
  -2  14  -6  520.75   54.81
   2  14   6  425.27   49.41
  -2  14  -7   42.35   19.43
   2  14   7   37.63   21.18
   2 -14   7    5.85   26.56
   2  14   7   70.71   19.89
  -2  14  -8  221.71   36.59
   2  14   8  203.54   34.06
   2 -14   8  185.83   39.78
  -2  14  -9    9.26   13.83
   2  14   9   23.67   17.89
  -2  14 -10  419.77   49.14
  -2  15   9  458.91   52.64
   2  15  -9  287.13   47.55
  -2  15   8   48.76   18.74
   2  15  -8   68.05   23.61
   2  15  -7  225.48   40.29
   2  15  -6  185.17   39.97
   2  15  -6  125.54   45.38
   2  15  -5  812.87   75.55
   2  15  -5 1111.26   94.02
  -2  15   4  269.83   40.83
   2  15  -4  293.83   48.72
  -2  15   3  538.11   56.20
   2  15  -3  622.63   68.89
  -2  15   2   14.11   16.10
   2 -15  -2   23.66   14.15
   2  15  -2   -8.11   14.50
   2  15  -1  560.17   62.14
  -2  15   1  637.87   60.92
   2  15  -1  539.21   64.02
  -2  15   0   82.51   21.45
   2  15   0   17.63   15.98
   2  15   0   82.64   27.84
   2  15   1  586.06   61.78
  -2  15  -1  441.13   55.09
   2  15   1  607.79   66.14
  -2  15  -2   17.64   14.52
   2  15   2   21.87   16.61
   2  15   2   21.71   14.84
   2  15   3  336.62   57.37
   2  15   3  530.88   61.75
   2  15   4  256.37   38.82
   2  15   4  219.47   40.24
  -2  15  -5  951.87   76.87
   2  15   5  838.63   75.15
  -2  15  -6  287.79   43.39
  -2  15  -7  234.98   42.93
  -2  15  -8   78.54   24.61
   2  15   8   61.77   20.64
   2  15   9  258.77   56.97
  -2  15 -10   99.30   30.40
   2  16  -7   63.72   37.41
   2  16  -6  446.44   64.57
  -2  16   5   78.45   21.04
   2  16  -5   -3.27   24.64
  -2  16   4  381.79   48.84
   2  16  -4  261.10   55.20
  -2  16   3   59.45   23.22
   2  16  -3   31.45   25.83
   2  16  -3   36.48   16.76
  -2  16   2  581.97   60.00
   2  16  -2  520.36   64.75
   2  16  -2  566.78   69.27
  -2  16   1   23.45   17.73
   2  16  -1    2.91   14.36
   2  16  -1    8.84   14.35
  -2  16   0  309.05   47.89
   2  16   0  243.98   49.44
   2  16   0  372.44   56.73
  -2  16  -1   12.68   17.82
   2  16   1   -3.55   16.16
  -2  16  -2  578.71   63.05
   2  16   2  616.90   67.06
   2  16   2  601.36   66.50
   2  16   3   45.94   21.09
   2  16   3   45.02   22.95
   2  16   4  388.96   53.64
   2  16   5  101.10   29.36
   2  17  -2  -17.73   21.09
   2  17  -1  195.18   43.55
   2  17   0    0.29   21.33
  -3   0  12    5.95    7.12
  -3   0  11 1742.62   62.99
   3   0 -11 1595.08   39.96
  -3   0  10    5.22    6.69
   3   0 -10    2.07    4.75
  -3   0   9  890.28   43.99
  -3   0   9  891.45   45.31
   3   0  -9  940.93   43.28
  -3   0   8    0.17    2.83
  -3   0   8    1.98    5.57
   3   0  -8    0.02    4.00
  -3   0   7  851.41   40.86
  -3   0   7  797.82   42.41
   3   0  -7  835.04   42.65
   3   0  -6   -0.55    2.64
   3   0  -6    0.48    2.18
  -3   0   6    3.63    5.45
   3   0  -6    0.45    3.85
  -3   0   5 4293.82   93.79
  -3   0   5 4185.25   84.85
   3   0  -4    2.38    3.32
   3   0  -4    1.16    3.31
  -3   0   4    2.07    2.79
  -3   0   4    1.47    2.90
  -3   0   3 1471.96   48.56
   3   0  -3 1501.83   49.41
  -3   0   3 1512.62   54.71
   3   0  -3 1535.41   54.89
  -3   0   2   -1.51    4.17
   3   0  -2    1.01    2.62
   3   0  -2    1.50    2.75
  -3   0   2    4.81    3.47
   3   0  -1 4820.06   87.52
  -3   0   1 4921.61   97.89
   3   0  -1 4640.23   93.42
  -3   0   0    4.84    5.21
   3   0   0    3.65    4.60
   3   0   0   -1.06    5.15
  -3   0   0    4.02    5.03
  -3   0  -1 4434.93   83.24
   3   0   1 4256.50   90.62
  -3   0  -1 4182.54   93.39
   3   0   2   -1.48    3.53
  -3   0  -2    4.28    3.47
   3   0   2   -0.50    3.12
  -3   0  -2    0.63    3.72
  -3   0  -3 1385.63   46.07
   3   0   3 1331.51   47.89
  -3   0  -3 1352.71   52.17
   3   0   4   -0.66    3.56
   3   0   4   -1.89    3.29
   3   0   5 3917.15   81.45
   3   0   5 3907.61   87.22
   3   0   6    7.92    5.55
   3   0   6    0.18    2.91
   3   0   7  857.90   40.20
   3   0   7  823.75   42.11
   3   0   8   -2.31    4.11
   3   0   8    3.12    3.92
   3   0   9  808.88   41.80
   3   0   9  805.58   41.29
   3   0  10    2.79    4.65
   3   0  10    1.60    4.43
   3   0  11 1619.75   63.78
   3   0  11 1561.50   53.43
   3   0  11 1747.01   58.09
   3   0  12    2.49    7.14
   3   0  12    2.61    4.60
   3   0  12    0.91    4.03
   3   0  13  576.38   23.13
   3   0  13  565.75   22.97
   3   0  14    0.31   10.48
  -3  -1  13   32.60   10.56
  -3  -1  12 1110.96   51.83
  -3   1  11  136.37   16.01
  -3  -1  11  138.46   20.04
   3   1 -11  130.06   14.74
  -3   1  10 1559.00   58.43
  -3   1  10 1510.70   55.55
  -3  -1  10 1479.37   60.78
  -3   1   9  309.66   25.36
  -3  -1   9  318.39   29.05
  -3   1   9  292.65   24.25
   3   1  -9  359.83   28.85
   3  -1  -9  328.12   23.54
  -3   1   8 2516.98   68.79
  -3  -1   8 2758.54   83.48
  -3   1   8 2625.29   75.35
   3  -1  -8 2777.64   72.60
   3   1  -8 2826.46   82.14
  -3   1   7  137.48   17.26
   3  -1  -7  142.27   16.89
  -3  -1   7  140.49   19.30
  -3  -1   7  148.80   18.36
   3   1  -6 1917.84   48.96
  -3   1   6 1933.26   63.37
  -3  -1   6 1943.99   67.82
  -3  -1   6 1872.04   61.79
  -3   1   6 1903.94   57.70
   3   1  -6 1687.97   44.45
   3  -1  -5  171.40   13.80
   3  -1  -5  206.52   15.80
   3   1  -5  202.54   17.99
  -3  -1   5  196.94   21.04
  -3   1   5  210.28   21.12
  -3   1   5  211.15   18.59
   3   1  -5  202.43   17.39
   3   1  -4 3153.42   74.22
  -3   1   4 3188.87   79.82
   3   1  -4 3302.22   83.00
   3   1  -4 3140.01   71.55
  -3   1   4 3172.62   71.60
   3   1  -3  717.75   38.65
   3  -1  -3  719.06   36.98
  -3  -1   3  749.45   39.82
   3   1  -3  707.30   34.57
  -3  -1   3  756.21   37.18
  -3   1   3  673.56   32.72
   3  -1  -3  725.35   33.17
  -3   1   2 3002.07   77.65
   3  -1  -2 2951.10   76.10
   3   1  -2 3072.18   79.28
  -3  -1   2 3028.98   79.87
  -3  -1   2 2918.74   71.61
   3   1  -2 3297.54   74.77
   3  -1  -2 3197.47   72.15
  -3   1   2 2848.73   67.79
  -3   1   1  236.37   21.87
  -3  -1   1  212.55   21.80
   3   1  -1  199.94   20.43
   3  -1  -1  216.47   20.61
   3   1  -1  193.96   19.00
   3  -1  -1  249.23   20.34
  -3   1   1  184.91   18.45
  -3  -1   1  212.33   19.67
  -3   1   0 3592.32   83.97
   3   1   0 3428.61   82.33
  -3  -1   0 3643.67   84.51
   3  -1   0 3322.79   80.02
  -3  -1   0 3640.10   77.11
   3  -1   0 3527.63   78.36
  -3   1   0 3575.23   75.91
   3   1   0 3708.23   79.90
   3   1   1  209.32   20.23
   3  -1   1  197.19   20.09
  -3   1  -1  191.89   21.31
  -3  -1  -1  182.33   20.12
  -3   1  -1  180.58   18.16
   3  -1   1  209.95   20.10
   3   1   1  194.79   19.02
  -3  -1  -1  225.61   19.03
  -3   1  -2 3148.04   81.08
  -3  -1  -2 3177.16   78.60
   3   1   2 2919.55   73.22
   3  -1   2 3101.91   77.53
   3  -1   2 3172.13   74.23
  -3   1  -2 3195.88   71.04
   3   1   2 3218.00   72.10
  -3  -1  -3  699.06   36.79
   3   1   3  596.47   33.50
   3  -1   3  717.61   35.39
   3   1   3  663.15   33.90
  -3   1  -3  687.96   32.71
   3  -1   4 3107.42   81.03
   3   1   4 3185.56   76.42
   3  -1   4 3404.29   78.28
  -3   1  -4 3215.85   69.03
   3   1   4 3336.30   74.59
   3   1   5  180.78   20.75
   3  -1   5  193.32   21.24
  -3   1  -5  193.59   16.85
   3   1   5  208.36   19.13
   3  -1   5  199.53   20.09
   3   1   6 1851.44   59.73
   3  -1   6 1749.47   62.68
   3   1   6 1935.31   56.95
   3  -1   6 1924.84   61.29
   3  -1   7  118.82   17.18
   3   1   7  108.66   15.26
   3   1   7  127.67   15.12
   3  -1   7  113.91   17.14
   3   1   8 2489.05   68.29
   3  -1   8 2359.11   73.64
   3   1   8 2463.78   66.29
   3  -1   8 2447.14   72.88
   3  -1   9  306.15   27.54
   3   1   9  286.77   23.80
   3  -1   9  264.18   24.91
   3   1   9  254.46   22.35
   3   1  10 1503.35   55.67
   3  -1  10 1528.96   61.34
   3   1  10 1379.35   48.61
   3  -1  10 1481.58   60.71
   3  -1  11  139.12   20.95
   3   1  11  141.49   14.58
   3  -1  11  148.95   18.05
   3   1  11  146.34   15.66
   3  -1  12 1161.21   57.56
   3   1  12 1093.58   52.29
   3  -1  12  982.40   46.09
   3   1  12 1013.65   32.61
   3   1  12 1097.94   34.93
   3  -1  12 1209.46   50.99
   3  -1  13   24.17   11.30
   3   1  13   18.77    9.47
   3  -1  13   20.58    5.57
   3  -1  13   22.89    7.74
   3  -1  14  271.23   14.33
   3  -1  14  296.62   14.35
  -3  -2  14   -8.27   10.45
  -3  -2  13  575.95   39.54
  -3   2  12   65.36   12.11
  -3  -2  12   78.17   15.81
  -3   2  11  499.25   34.68
  -3  -2  11  546.40   40.23
   3   2 -11  558.53   36.06
  -3   2  10  207.37   20.97
  -3  -2  10  211.34   25.04
   3   2 -10  235.81   25.20
   3  -2 -10  173.87   10.17
  -3   2   9 1110.83   46.00
  -3   2   9 1190.04   49.42
  -3  -2   9 1119.09   56.31
   3   2  -9 1212.37   57.04
   3  -2  -9 1183.79   40.83
  -3  -2   8  227.34   25.20
  -3   2   8  234.83   22.50
   3  -2  -8  226.30   20.31
   3   2  -8  240.23   26.46
   3   2  -7 1126.11   35.19
  -3  -2   7 1282.78   58.08
   3  -2  -7 1208.59   47.64
  -3   2   7 1253.46   51.21
   3   2  -6  368.81   24.50
   3   2  -6  326.07   21.64
  -3   2   6  319.84   22.90
  -3   2   6  334.16   26.34
  -3  -2   6  370.30   30.31
   3  -2  -6  362.92   26.64
   3  -2  -5 2371.56   49.69
   3   2  -5 2425.99   65.52
   3  -2  -5 2487.50   49.89
  -3   2   5 2409.48   63.68
   3   2  -5 2501.79   64.68
  -3   2   5 2688.77   74.34
   3   2  -5 2606.96   79.88
   3  -2  -4  237.11   18.55
   3   2  -4  247.30   21.54
  -3   2   4  267.49   23.07
  -3  -2   4  254.23   24.53
   3   2  -4  254.35   24.26
   3   2  -4  207.11   20.68
  -3   2   4  228.29   19.69
   3   2  -3 3159.77   79.05
  -3   2   3 2982.06   71.26
   3   2  -3 3103.28   76.13
   3  -2  -3 3241.53   70.88
  -3  -2   3 3341.00   86.39
   3  -2  -3 3422.92   82.53
   3   2  -3 3112.97   83.47
   3   2  -2   37.82    9.41
  -3   2   2   16.60    6.96
   3  -2  -2   40.81    8.98
   3  -2  -2   30.44    8.52
  -3   2   2   41.00    9.25
  -3  -2   2   48.24   11.29
   3   2  -2   39.82    9.42
   3   2  -1 2886.21   71.68
  -3   2   1 2597.06   66.27
   3  -2  -1 2926.82   72.79
   3   2  -1 2792.86   76.23
  -3  -2   1 2720.54   75.83
  -3   2   1 2763.74   75.19
   3  -2  -1 2793.34   73.81
  -3   2   0 4161.14   84.17
   3   2   0 4604.79   89.35
   3  -2   0 4613.29   90.66
   3   2   0 3856.11   92.15
  -3  -2   0 4523.15   97.09
  -3   2   0 4526.02   96.90
   3  -2   0 4190.57   92.32
   3  -2   1 2798.78   72.01
  -3   2  -1 2789.54   68.05
   3   2   1 2727.89   69.63
  -3  -2  -1 2884.78   76.79
   3  -2   1 2752.03   75.57
   3   2   1 2624.35   73.68
   3  -2   2   42.71   10.25
   3   2   2   31.62    8.74
  -3   2  -2   35.74    8.84
   3  -2   2   35.74   10.13
  -3  -2  -2   24.96    7.75
   3   2   2   32.75    8.63
   3   2   3 3424.17   76.08
  -3   2  -3 3004.83   71.64
   3  -2   3 3530.12   83.08
  -3  -2  -3 3005.91   77.56
   3   2   3 3218.67   78.29
   3   2   4  267.27   21.48
  -3   2  -4  258.78   20.76
   3  -2   4  255.11   24.04
   3   2   4  230.25   21.64
  -3  -2  -4  228.24   23.03
   3  -2   4  255.92   25.11
   3   2   5 2580.19   66.12
  -3   2  -5 2561.54   62.14
   3  -2   5 2704.31   75.28
   3   2   5 2641.60   70.10
   3  -2   5 2543.24   78.09
   3   2   6  271.94   21.33
   3  -2   6  314.83   25.21
  -3   2  -6  302.26   20.53
   3   2   6  275.77   23.31
   3  -2   6  291.30   27.35
   3  -2   7 1071.94   50.61
   3   2   7 1088.89   42.65
   3  -2   7 1107.38   52.16
   3   2   7 1092.67   45.78
   3   2   8  251.72   20.97
   3  -2   8  266.46   26.21
   3   2   8  232.54   20.58
   3  -2   9 1047.64   52.17
   3   2   9 1015.51   42.83
   3  -2   9 1111.66   55.20
   3   2   9 1008.48   41.96
   3  -2   9 1119.17   55.62
   3  -2  10  195.84   23.59
   3   2  10  207.49   19.95
   3   2  10  235.50   19.16
   3  -2  10  202.25   23.77
   3  -2  10  214.97   24.23
   3  -2  11  531.70   40.04
   3   2  11  470.41   31.97
   3  -2  11  441.12   34.21
   3   2  11  401.37   23.75
   3  -2  11  526.93   37.35
   3  -2  12   48.47   12.05
   3  -2  12   46.10   12.74
   3  -2  12   61.87   13.30
   3  -2  13  563.86   45.80
   3  -2  13  537.88   36.51
   3  -2  13  571.74   36.43
   3   2  14   -8.85   10.24
  -3  -3  15   86.40   18.42
  -3  -3  14  535.89   40.58
  -3   3  13   75.35   15.82
  -3  -3  13   73.82   17.14
  -3   3  12  364.22   30.32
  -3  -3  12  412.82   37.67
   3   3 -12  413.51   34.10
  -3   3  11  319.40   25.67
  -3  -3  11  358.14   35.00
   3   3 -11  395.76   34.11
  -3   3  10  860.75   41.78
  -3  -3  10  916.91   54.46
   3   3 -10  999.92   56.23
  -3   3   9  166.38   17.55
  -3  -3   9  165.76   22.96
   3   3  -9  127.90   20.48
   3  -3  -9  151.72   13.51
   3   3  -8 1286.19   32.78
   3  -3  -8 1478.01   49.29
  -3  -3   8 1449.42   66.92
  -3   3   8 1362.36   49.61
   3   3  -7 1008.34   40.62
   3  -3  -7  899.47   43.80
  -3  -3   7 1032.43   54.72
   3   3  -7  964.67   37.97
   3   3  -6 3096.12   76.92
   3   3  -6 3037.53   74.65
   3  -3  -5  104.60    9.52
   3   3  -5  110.64   15.93
  -3  -3   5  147.35   20.54
   3   3  -5  132.64   19.28
   3  -3  -4 2780.05   63.35
   3   3  -4 2750.27   74.14
  -3   3   4 2667.14   69.00
  -3  -3   4 2725.89   85.31
   3   3  -4 2675.21   83.18
   3  -3  -3  572.70   30.93
   3   3  -3  596.53   36.14
   3   3  -3  547.31   34.22
  -3   3   3  589.42   32.67
   3  -3  -3  580.74   35.11
  -3  -3   3  620.00   40.03
   3   3  -3  614.10   38.67
   3  -3  -2 5105.78   95.66
   3   3  -2 5064.13  100.74
   3  -3  -2 5089.31  102.78
  -3  -3   2 5168.04  111.45
   3   3  -2 5007.82  107.30
   3   3  -1 2449.85   69.94
   3  -3  -1 2670.60   70.48
   3   3  -1 2543.81   75.59
  -3  -3   1 2551.65   77.92
   3  -3  -1 2584.31   74.88
   3  -3   0 2376.51   67.58
   3   3   0 2484.77   70.37
  -3  -3   0 2334.97   73.38
   3   3   0 2291.43   70.64
   3  -3   0 2366.26   72.33
   3   3   1 2681.15   70.98
   3  -3   1 2713.58   73.10
   3   3   1 2536.50   73.10
  -3  -3  -1 2537.25   74.13
   3  -3   1 2527.22   76.57
   3   3   2 4875.52   94.63
   3  -3   2 5004.00  100.88
   3  -3   2 4616.24  106.24
  -3  -3  -2 4859.13  102.99
   3  -3   3  582.09   35.17
   3   3   3  580.54   32.59
  -3  -3  -3  588.03   34.80
   3   3   3  587.22   35.58
   3  -3   3  614.90   38.75
   3   3   4 2837.03   71.07
   3  -3   4 2853.65   79.84
   3  -3   4 2866.76   84.02
  -3  -3  -4 2755.67   75.27
   3   3   4 2633.61   71.95
   3  -3   5  117.30   17.05
  -3   3  -5  109.66   14.49
   3   3   5  118.22   14.55
   3   3   5   85.85   13.53
  -3  -3  -5   68.28   13.51
   3  -3   5   89.96   17.29
   3  -3   6 3217.22   88.27
  -3   3  -6 3349.58   73.33
   3   3   6 3410.87   78.15
   3  -3   6 3286.91   94.23
   3   3   6 3175.21   78.17
   3   3   7  956.04   40.65
  -3   3  -7  929.77   35.46
   3  -3   7  850.81   51.59
   3  -3   8 1257.35   57.85
   3   3   8 1286.74   47.54
   3   3   8 1313.63   48.55
   3  -3   8 1401.54   63.24
   3  -3   8 1424.77   66.29
   3   3   9  116.38   15.09
   3  -3   9  133.31   19.08
   3  -3   9  103.10   19.35
   3   3   9  120.62   14.26
   3  -3   9  156.13   22.62
   3  -3  10  772.35   51.59
   3   3  10  806.45   39.00
   3  -3  10  747.45   47.87
   3  -3  10  872.23   51.63
   3  -3  11  354.38   35.28
   3   3  11  321.67   26.01
   3  -3  11  329.70   31.87
   3   3  11  284.75   17.70
   3  -3  11  373.88   34.96
   3  -3  12  414.24   39.37
   3  -3  12  334.44   32.90
   3   3  13   43.18   10.82
   3  -3  13   50.63   14.13
   3  -3  13   57.11   14.64
   3  -3  14  492.57   50.86
   3  -3  14  379.85   31.99
   3  -3  14  489.60   36.85
   3  -3  15   71.38   12.90
  -3  -4  14   10.86   10.60
  -3   4  13  192.38   22.17
  -3  -4  13  196.96   27.37
  -3   4  12   26.26    9.11
  -3  -4  12   34.81   13.97
   3   4 -12    6.67    7.70
  -3   4  11  694.37   38.98
  -3  -4  11  779.92   54.54
   3   4 -11  800.28   52.58
  -3   4  10   86.76   13.60
  -3  -4  10   97.08   19.80
   3   4 -10   88.46   17.85
  -3   4   9  231.54   22.10
  -3  -4   9  270.68   31.88
   3  -4  -9  243.95   16.61
   3   4  -8  161.35   17.71
   3   4  -8  172.80   15.94
  -3   4   8  180.48   19.31
  -3  -4   8  231.87   29.65
   3  -4  -8  181.82   17.37
  -3   4   7 2351.78   67.22
   3   4  -7 2498.79   68.93
   3  -4  -7 2508.75   69.88
   3   4  -6   61.29   12.27
   3   4  -6   48.43   11.82
  -3   4   6   55.54   10.86
  -3  -4   6   66.35   14.93
   3  -4  -6   44.15    9.90
   3   4  -6   71.06   15.69
   3   4  -5 2117.74   70.10
   3   4  -5 2155.06   69.79
  -3   4   5 1912.40   61.14
  -3  -4   5 2017.63   77.09
   3   4  -5 2096.47   78.03
   3   4  -4  151.56   19.86
   3  -4  -4  145.95   15.00
   3   4  -4  133.52   20.05
  -3   4   4  147.94   17.53
  -3  -4   4  168.43   21.57
   3   4  -4  156.72   21.32
   3  -4  -3 3700.60   81.15
   3   4  -3 3706.23   93.87
   3   4  -3 3969.74   94.85
  -3   4   3 3628.59   84.63
  -3  -4   3 3722.69  101.60
   3  -4  -3 3689.01   91.24
   3   4  -3 3679.32  100.06
   3   4  -2  447.49   33.14
   3  -4  -2  537.45   32.64
   3   4  -2  489.26   33.82
  -3   4   2  463.74   30.72
  -3  -4   2  448.83   35.83
   3  -4  -2  519.12   34.64
   3   4  -2  472.25   35.25
   3   4  -1 4525.13  102.83
   3  -4  -1 4324.58   95.55
   3   4  -1 4515.94  101.65
  -3   4   1 4706.40   98.11
  -3  -4   1 4725.16  111.80
   3  -4  -1 4530.02  103.91
   3   4  -1 4573.24  106.78
  -3  -4   0   47.00   12.26
   3  -4   0   45.27   11.14
   3   4   0   54.09   12.55
   3  -4   0   51.18   11.11
  -3   4   0   51.15   11.10
   3  -4   1 4849.98  104.32
   3  -4   1 4719.57  109.45
  -3  -4  -1 4418.58  102.82
  -3   4  -1 4686.84   99.90
   3  -4   2  523.21   34.07
   3   4   2  467.22   32.79
   3  -4   2  489.91   35.85
  -3  -4  -2  540.42   35.57
  -3   4  -2  529.29   33.51
   3  -4   3 3474.91   92.15
   3   4   3 3288.44   85.44
  -3   4  -3 3436.43   86.61
   3  -4   4  133.73   19.31
  -3   4  -4  142.76   18.05
  -3  -4  -4  126.92   16.87
   3   4   4  135.64   17.32
  -3   4  -5 2061.46   63.86
  -3  -4  -5 1931.10   64.64
   3   4   5 1900.57   63.65
   3   4   6   46.84   10.10
   3  -4   6   48.39   12.27
  -3  -4  -6   35.35    9.83
   3   4   6   48.31   10.26
   3  -4   7 2453.01   84.26
   3   4   7 2311.45   65.34
  -3   4  -7 2518.28   65.20
   3   4   7 2348.34   67.47
   3  -4   7 2526.61   88.85
   3  -4   7 2552.93   91.18
   3  -4   8  156.51   22.65
  -3   4  -8  168.96   15.04
   3   4   8  140.65   17.14
   3  -4   8  149.38   23.48
   3   4   8  177.25   17.98
   3  -4   8  167.65   25.40
   3   4   9  208.69   19.58
   3  -4   9  199.50   27.35
   3  -4   9  216.62   27.24
   3   4   9  212.66   19.19
   3  -4  10   70.68   16.23
   3   4  10   70.90   13.11
   3  -4  10   81.18   17.75
   3   4  10   83.95   11.13
   3  -4  10   90.61   18.18
   3  -4  11  491.51   43.25
   3   4  11  542.43   32.67
   3  -4  11  673.33   48.35
   3  -4  11  691.21   50.09
   3  -4  12   15.87    8.48
   3  -4  12    8.17    7.79
   3   4  13  227.17   23.45
   3  -4  13  223.82   32.23
   3  -4  13  239.30   29.48
   3  -4  14    2.62   10.40
   3  -4  14    5.59   11.47
  -3   5  14  297.19   29.95
  -3  -5  14  358.15   40.68
  -3   5  13   47.17   12.38
  -3  -5  13   66.60   17.03
  -3   5  12  418.59   31.12
  -3  -5  12  410.74   43.10
   3   5 -12  391.41   39.74
  -3   5  11   25.98    7.97
  -3  -5  11   41.48   15.53
   3   5 -11   52.71   16.99
  -3   5  10  675.04   38.05
  -3  -5  10  731.21   54.63
   3   5 -10  611.85   50.97
   3   5  -9  240.71   18.34
   3   5  -9  242.93   17.48
  -3   5   9  271.03   24.47
  -3  -5   9  293.77   35.40
   3   5  -8 1808.73   60.50
   3  -5  -8 1895.75   57.72
   3  -5  -8 1743.00   57.64
   3   5  -7  128.51   18.99
   3   5  -7  117.79   17.09
  -3   5   7  111.65   15.77
   3  -5  -7  128.82   16.63
   3   5  -7  137.19   23.64
   3  -5  -7   82.88   16.57
  -3  -5   7  104.32   20.58
   3   5  -6 1963.70   72.27
   3   5  -6 1783.19   65.66
  -3   5   6 1824.00   62.73
   3  -5  -6 2080.55   68.21
  -3  -5   6 1932.86   80.71
   3   5  -6 2056.82   83.83
   3  -5  -5   80.66    9.17
   3   5  -5   96.33   15.84
   3   5  -5   85.83   17.03
  -3   5   5   86.18   13.68
  -3  -5   5  100.11   20.14
   3   5  -5  104.71   19.05
   3  -5  -4 2448.53   64.71
   3   5  -4 2279.56   76.95
  -3   5   4 2373.26   71.08
   3   5  -4 2571.03   81.54
  -3  -5   4 2311.41   85.79
   3   5  -4 2475.27   87.68
   3  -5  -3   55.55   10.73
   3   5  -3   35.61   10.89
  -3   5   3   56.02   11.42
   3   5  -3   50.38   10.82
   3  -5  -3   57.69   12.68
   3   5  -3   49.84   12.04
  -3  -5   3   56.90   14.65
   3  -5  -2 4421.63   97.35
   3   5  -2 4144.11  105.74
  -3   5   2 4401.11   98.45
  -3  -5   2 4510.62  114.54
   3  -5  -2 4403.08  106.76
   3   5  -2 4288.63  111.88
   3   5  -1  321.44   28.42
   3  -5  -1  319.28   28.29
  -3   5   1  293.76   26.69
   3  -5  -1  332.56   29.86
  -3  -5   1  351.80   31.84
   3   5  -1  325.42   30.22
   3   5   0 1537.63   61.87
   3  -5   0 1468.58   60.74
  -3   5   0 1390.18   56.99
  -3  -5   0 1563.26   65.79
   3  -5   0 1475.51   63.68
   3  -5   1  305.05   29.25
  -3   5  -1  318.74   28.51
  -3  -5  -1  285.07   30.65
   3   5   1  298.13   28.42
   3  -5   2 4774.31  108.94
  -3   5  -2 4497.01  103.47
  -3  -5  -2 4535.72  107.54
  -3   5  -3   48.43   11.93
   3   5   3   39.28    9.89
   3  -5   4 2381.37   80.08
  -3   5  -4 2390.99   76.22
  -3  -5  -4 2241.76   73.32
   3   5   4 2164.59   72.73
   3  -5   5   81.20   18.52
   3  -5   5   98.16   17.70
  -3   5  -5  100.00   15.54
  -3  -5  -5   79.64   14.17
   3   5   5  102.04   15.56
   3  -5   6 1758.64   74.94
  -3   5  -6 1874.02   64.54
   3  -5   6 1826.25   79.41
   3   5   6 1817.60   63.80
  -3   5  -7  127.43   16.11
   3  -5   7  134.51   20.57
  -3  -5  -7   85.36   14.49
   3   5   7  106.23   15.16
   3  -5   7  106.27   21.46
  -3   5  -8 1773.03   54.58
   3   5   8 1767.96   60.57
   3  -5   8 1704.07   76.95
   3  -5   8 1724.14   80.27
   3   5   8 1739.33   59.42
   3  -5   9  200.20   26.37
   3   5   9  199.00   22.39
  -3   5  -9  209.37   13.62
   3  -5   9  276.62   32.66
   3   5   9  229.53   21.02
   3  -5   9  278.92   32.40
   3  -5  10  607.14   47.03
   3   5  10  480.50   31.36
   3  -5  10  571.90   48.44
   3  -5  10  624.68   49.67
   3  -5  11   27.66   10.32
   3   5  11   25.03    4.30
   3  -5  12  324.57   41.46
   3  -5  12  335.50   38.32
   3  -5  12  311.45   35.49
   3   5  13   52.30   12.24
   3  -5  13   60.18   18.35
   3  -5  14  398.07   41.45
  -3   6  13  391.55   30.51
  -3  -6  13  383.86   44.57
  -3   6  12   27.83   10.34
  -3  -6  12   28.48   13.35
   3   6 -12   29.57   14.21
  -3   6  11  371.97   30.07
  -3  -6  11  426.36   46.33
   3   6 -11  417.14   44.99
  -3   6  10  573.41   36.79
  -3  -6  10  597.27   52.91
   3   6  -9 1533.52   54.74
  -3   6   9 1712.90   63.72
   3  -6  -9 1589.65   46.04
   3   6  -8  536.48   37.33
   3   6  -8  479.90   35.38
  -3   6   8  556.66   36.13
   3  -6  -8  617.07   34.77
  -3  -6   8  568.55   49.45
   3  -6  -8  504.82   31.38
   3   6  -8  598.06   50.38
   3   6  -7  770.08   47.59
  -3   6   7  741.01   41.08
   3  -6  -7  752.06   43.10
  -3  -6   7  777.27   56.68
   3   6  -7  830.95   56.79
   3  -6  -7  592.78   37.65
   3   6  -6   35.41   11.95
  -3   6   6   27.62    7.85
   3   6  -6   32.72   11.52
   3  -6  -6   38.93   11.04
  -3  -6   6   41.22   13.58
   3   6  -6   54.84   17.17
   3  -6  -6   16.24   11.49
   3   6  -5 2086.69   79.93
   3  -6  -5 1974.59   48.67
   3   6  -5 2041.80   79.67
  -3   6   5 2062.58   70.00
  -3  -6   5 1963.43   85.37
   3   6  -5 2079.20   88.07
   3  -6  -5 1911.74   73.43
   3  -6  -4  104.46   14.52
   3   6  -4  114.77   18.46
   3   6  -4  123.85   17.76
  -3   6   4  129.10   17.58
  -3  -6   4  114.39   19.97
   3   6  -4  107.72   19.92
   3  -6  -3 2184.79   69.18
   3   6  -3 1878.87   75.74
  -3   6   3 2108.34   71.42
   3  -6  -3 2075.35   76.53
  -3  -6   3 2107.42   85.25
   3   6  -3 1954.23   82.76
   3   6  -2  914.56   51.85
   3  -6  -2  948.47   46.82
  -3   6   2  918.07   48.10
  -3  -6   2  967.77   56.17
   3  -6  -2  977.59   53.78
   3   6  -2  928.83   54.94
   3  -6  -1 4555.22  108.56
   3   6  -1 4727.39  115.67
  -3   6   1 4430.94  107.66
  -3  -6   1 4688.41  121.77
   3  -6  -1 4677.50  117.49
   3   6  -1 4446.16  117.45
   3  -6   0  253.98   25.75
   3   6   0  262.25   27.60
  -3   6   0  266.38   26.02
  -3  -6   0  236.33   27.86
   3   6   0  244.06   27.57
   3   6   1 4518.39  112.41
  -3   6  -1 4760.58  111.21
  -3  -6  -1 4794.41  118.14
   3   6   1 4444.47  114.78
   3   6   2  981.72   50.92
   3  -6   2  954.20   52.84
  -3   6  -2  938.95   50.95
  -3  -6  -2  918.91   52.00
   3   6   2  938.08   51.50
   3  -6   3 2056.98   84.32
   3  -6   3 2111.22   80.77
  -3   6  -3 1980.09   74.34
  -3  -6  -3 2214.67   78.91
   3   6   3 2100.25   76.36
  -3   6  -4   90.24   16.44
   3  -6   4   79.17   16.49
  -3  -6  -4  103.42   16.93
   3  -6   4   75.82   17.56
   3   6   4   91.10   16.91
   3  -6   5 2134.20   82.74
  -3   6  -5 2040.90   74.56
   3  -6   5 1906.94   84.13
   3   6   5 1964.84   71.03
  -3   6  -6   39.36   11.03
   3  -6   6   24.72   11.50
  -3  -6  -6   34.21   11.28
   3  -6   6   48.50   14.02
   3   6   6   44.44   12.42
   3  -6   7  589.25   45.69
  -3   6  -7  700.79   40.86
  -3  -6  -7  521.79   35.02
   3  -6   7  658.23   51.21
   3   6   7  578.92   38.14
   3  -6   8  526.72   46.64
  -3   6  -8  569.61   35.18
   3  -6   8  526.22   46.96
   3   6   8  457.94   32.53
  -3   6  -9 1677.86   51.28
   3  -6   9 1714.15   83.94
   3   6  10  472.40   27.96
   3  -6  10  570.33   49.80
   3  -6  11  334.91   39.63
   3   6  11  274.20   25.06
   3  -6  11  329.95   38.36
   3   6  11  225.11   14.56
   3  -6  11  347.61   39.72
   3   6  12   14.36    7.37
   3  -6  12   30.92   14.62
   3   6  13  208.04   21.95
   3  -6  13  242.76   36.55
   3  -6  13  293.82   38.29
  -3   7  13  109.82   17.75
  -3   7  12  453.05   35.83
  -3  -7  12  486.74   52.66
   3   7 -12  473.51   49.53
  -3   7  11  192.56   22.42
  -3  -7  11  160.48   28.33
   3   7 -11  205.64   31.05
   3   7 -10 1206.65   44.58
  -3   7  10 1456.41   62.65
   3   7  -9  166.15   21.14
   3   7  -9  166.66   21.79
  -3   7   9  168.57   21.33
   3  -7  -9  188.44   17.53
   3   7  -9  167.50   30.91
  -3  -7   9  130.09   28.41
   3   7  -8 1587.73   69.40
   3   7  -8 1401.40   64.05
  -3   7   8 1453.16   61.90
   3  -7  -8 1543.01   57.35
  -3  -7   8 1436.68   80.88
   3   7  -8 1449.81   82.76
   3   7  -7   82.46   17.89
  -3   7   7   88.24   15.80
   3   7  -7   60.08   15.33
   3  -7  -7   71.24   13.95
   3   7  -7   52.92   18.52
  -3  -7   7   66.05   20.49
   3  -7  -7   77.68   14.45
   3   7  -6 1041.39   59.25
  -3   7   6 1007.76   51.32
   3   7  -6 1113.41   60.99
   3  -7  -6 1093.37   55.86
  -3  -7   6 1000.94   64.84
   3   7  -6 1036.84   68.18
   3  -7  -6 1118.89   56.87
   3   7  -5   45.28   14.18
  -3   7   5   39.78   11.04
   3   7  -5   37.17   13.28
   3  -7  -5   49.59    8.99
   3   7  -5   51.55   15.86
   3  -7  -5   45.98   14.48
  -3  -7   5   46.79   15.71
   3   7  -4 1656.17   73.65
   3  -7  -4 1600.10   57.80
  -3   7   4 1642.28   66.59
  -3  -7   4 1660.57   80.12
   3   7  -4 1601.08   79.96
   3  -7  -4 1444.49   73.17
   3  -7  -3  162.22   19.63
   3   7  -3  111.63   23.24
  -3   7   3  153.66   20.83
   3  -7  -3  152.48   22.34
  -3  -7   3  154.65   23.76
   3  -7  -3  175.39   24.25
   3  -7  -2  731.25   44.35
   3   7  -2  695.40   47.49
  -3   7   2  731.09   45.33
  -3  -7   2  739.80   52.89
   3  -7  -2  729.59   48.55
   3  -7  -2  681.99   48.89
   3   7  -2  702.47   50.78
   3   7  -1  881.59   55.22
  -3   7   1  971.50   51.90
  -3  -7   1  820.36   53.58
   3   7  -1  880.35   56.74
   3  -7  -1  934.54   58.51
  -3   7   0 3481.75   99.66
   3   7   0 3471.02  103.98
   3  -7   0 3466.50  102.61
   3   7   0 3367.18  106.11
   3  -7   1 1085.68   57.48
   3   7   1 1092.04   58.07
  -3   7  -1  922.43   55.70
  -3  -7  -1 1058.00   58.87
   3  -7   1  939.31   61.15
   3   7   1  968.28   55.73
   3  -7   2  784.08   51.40
   3   7   2  733.54   46.71
  -3   7  -2  731.56   47.67
  -3  -7  -2  692.07   46.91
   3  -7   2  644.16   53.38
   3   7   2  718.98   47.99
   3  -7   3  173.56   26.10
   3   7   3  159.97   23.52
  -3   7  -3  177.32   23.10
  -3  -7  -3  145.01   23.29
   3  -7   3  195.64   26.82
   3   7   3  149.35   23.10
   3  -7   4 1666.37   77.12
   3   7   4 1595.37   69.22
  -3   7  -4 1612.07   70.55
   3   7   4 1495.37   67.21
   3  -7   4 1598.67   80.09
   3  -7   5   60.92   14.83
  -3   7  -5   36.74   11.40
  -3  -7  -5   54.68   13.52
   3   7   5   50.02   13.01
   3  -7   5   48.33   14.91
   3  -7   6 1103.24   64.93
  -3  -7  -6  947.39   52.16
   3  -7   6  994.61   65.68
   3   7   6 1023.76   54.26
   3  -7   7   62.81   18.65
  -3   7  -7   74.31   15.13
  -3  -7  -7   62.99   14.81
   3  -7   7   78.29   20.50
   3   7   7   81.34   15.55
   3  -7   8 1045.62   65.26
  -3   7  -8 1382.34   59.41
  -3  -7  -8  920.23   43.77
   3  -7   8 1317.13   75.88
  -3   7  -9  179.18   19.43
   3   7   9  146.99   17.75
   3  -7   9  172.27   29.36
  -3   7 -10 1238.40   38.84
   3   7  10 1325.54   49.50
   3   7  11  134.84   22.18
   3   7  11  118.75   11.80
   3   7  12  413.17   35.81
   3   7  12  305.06   27.66
   3  -7  12  470.06   50.06
   3  -7  12  380.32   44.83
   3   7  13   79.00   15.99
  -3   8  13  477.23   35.83
  -3   8  12  200.00   24.84
  -3  -8  12  150.86   35.19
  -3   8  11  617.32   42.64
  -3  -8  11  630.61   60.79
  -3   8  10   52.63   13.06
   3   8 -10   59.08   13.94
   3   8 -10   47.78   11.36
  -3  -8  10   48.72   19.87
   3   8  -9  836.73   51.61
  -3   8   9  949.77   53.10
   3   8  -9  805.12   51.57
   3  -8  -9  766.88   40.75
  -3  -8   9  898.64   68.63
   3   8  -9  897.30   71.22
   3   8  -8   18.88   12.09
  -3   8   8   23.55    9.43
   3   8  -8    6.49    9.33
   3  -8  -8   20.02    8.28
   3  -8  -8   16.90    8.17
   3   8  -8   13.96   12.77
  -3  -8   8   16.36    8.13
   3   8  -7 1466.48   72.90
  -3   8   7 1503.43   66.08
   3   8  -7 1352.78   70.45
   3  -8  -7 1500.87   66.42
  -3  -8   7 1409.65   83.23
   3   8  -7 1577.51   88.19
   3   8  -6  247.63   34.42
   3   8  -6  166.54   24.86
  -3   8   6  270.56   28.17
  -3  -8   6  209.97   33.04
   3  -8  -6  304.57   31.88
   3  -8  -6  217.16   26.24
   3   8  -6  241.96   34.31
   3   8  -5 1205.96   67.24
  -3   8   5 1234.31   59.45
  -3  -8   5 1253.33   74.66
   3   8  -5 1222.32   73.50
   3  -8  -5 1125.99   59.73
   3   8  -4  329.32   36.13
   3  -8  -4  321.67   26.93
  -3   8   4  339.64   31.57
   3  -8  -4  378.04   36.27
  -3  -8   4  330.78   39.14
   3   8  -4  357.61   40.57
   3  -8  -4  310.81   35.00
   3   8  -3 1108.49   63.66
   3  -8  -3 1234.26   57.16
  -3   8   3 1124.73   57.39
   3  -8  -3 1180.20   64.44
  -3  -8   3 1083.84   67.65
   3   8  -3 1096.27   67.53
   3  -8  -3 1160.03   64.83
  -3   8   2  144.51   20.47
   3   8  -2  126.62   22.88
   3   8  -2  126.42   25.67
   3  -8  -2  130.84   24.75
   3  -8  -1 2731.79   95.06
   3   8  -1 2618.57   94.82
  -3   8   1 3071.20   96.71
  -3  -8   1 2927.41  105.18
   3  -8  -1 3051.00  106.05
   3   8  -1 2632.28  102.56
   3  -8   0 2305.90   85.94
   3   8   0 2077.87   86.55
  -3   8   0 2091.11   82.13
  -3  -8   0 1972.87   89.86
   3  -8   0 2169.10   90.63
   3   8   0 2147.76   89.58
   3   8   1 3082.07  101.66
   3  -8   1 3224.68  104.79
  -3   8  -1 3023.43   98.81
  -3  -8  -1 3035.87  106.45
   3   8   1 3168.91  105.41
   3  -8   1 3016.36  109.63
   3   8   2  110.15   20.99
   3  -8   2  144.40   23.45
  -3   8  -2  109.28   20.51
  -3  -8  -2  118.75   22.95
   3  -8   2  151.70   24.90
   3   8   2  122.28   21.13
   3   8   3 1240.30   63.16
   3  -8   3 1256.94   67.80
  -3   8  -3 1132.76   62.29
  -3  -8  -3 1273.54   66.48
   3  -8   3 1151.15   68.86
   3   8   3 1166.85   63.35
   3   8   4  357.86   34.17
   3  -8   4  378.65   38.03
  -3   8  -4  369.26   34.85
  -3  -8  -4  358.58   33.95
   3  -8   4  364.50   39.77
   3   8   4  276.28   32.66
   3   8   5 1129.96   60.75
   3  -8   5 1249.81   70.06
  -3   8  -5 1094.83   61.75
   3  -8   5 1142.89   70.18
   3   8   5 1065.15   60.94
   3   8   6  191.55   25.04
   3  -8   6  229.32   30.43
  -3   8  -6  257.58   29.76
   3   8   6  224.20   27.82
   3  -8   6  224.76   30.71
  -3   8  -7 1672.73   73.89
   3   8   7 1535.38   71.27
   3  -8   7 1510.56   84.69
   3   8   7 1481.93   66.58
   3  -8   8   33.11   17.03
   3   8   8   28.90    9.20
  -3   8  -8   17.32    6.80
  -3  -8  -8    1.53    6.05
   3   8   8   17.68    8.31
   3  -8   8   11.99    8.78
   3   8   9  929.53   54.72
   3  -8   9  715.39   58.70
  -3   8  -9  881.37   47.92
   3   8   9  812.35   46.04
   3  -8   9  905.19   67.44
  -3   8 -10   79.80   12.90
   3   8  10   91.15   18.31
   3   8  10   59.47   11.62
   3  -8  10   73.31   22.54
   3   8  11  729.45   48.43
   3   8  11  351.36   22.68
   3   8  12  141.82   25.16
   3   8  12  126.66   20.27
   3  -8  12  178.28   33.06
   3  -8  12  116.52   26.38
   3   8  13  534.97   42.10
  -3   9  12  756.94   52.28
   3   9 -11   37.29    9.79
  -3   9  11   32.62   13.22
  -3  -9  11   37.53   21.03
   3   9 -10  530.56   40.95
   3   9 -10  452.32   37.05
  -3   9  10  464.72   38.75
  -3  -9  10  462.54   55.38
   3   9 -10  531.94   56.33
   3   9  -9   22.51   12.82
  -3   9   9   32.23   12.69
   3   9  -9   19.87   10.39
   3  -9  -9   29.34    8.91
  -3  -9   9   34.00   19.67
   3   9  -9   15.55   13.38
   3   9  -8 1266.59   71.84
  -3   9   8 1199.34   62.92
   3   9  -8  998.19   62.21
  -3  -9   8 1130.65   80.45
   3  -9  -8 1270.56   60.70
   3   9  -8 1284.23   85.25
   3   9  -7  243.33   33.61
   3   9  -7  209.33   34.70
  -3   9   7  232.57   26.99
  -3  -9   7  232.15   39.09
   3  -9  -7  290.14   30.88
   3  -9  -7  235.45   29.56
   3   9  -7  254.83   37.88
   3   9  -6 1557.48   80.59
  -3   9   6 1494.17   69.77
   3  -9  -6 1608.57   74.46
  -3  -9   6 1457.39   85.89
   3   9  -5  215.99   31.87
   3  -9  -5  209.86   19.34
  -3   9   5  234.01   28.67
  -3  -9   5  234.71   36.75
   3  -9  -5  263.06   29.51
   3   9  -5  255.21   36.65
   3   9  -4  645.55   54.30
  -3   9   4  714.23   49.11
   3  -9  -4  687.68   41.65
   3  -9  -4  743.06   52.82
   3  -9  -4  694.49   52.01
   3   9  -4  642.62   57.85
   3   9  -3  165.81   26.90
  -3   9   3  200.63   25.99
   3   9  -3  132.26   27.22
   3  -9  -3  193.94   27.39
  -3  -9   3  141.41   26.41
   3  -9  -2 1231.95   63.92
   3   9  -2 1107.02   67.02
  -3   9   2 1185.41   63.41
  -3  -9   2 1088.35   71.70
   3   9  -2 1149.08   72.44
   3  -9  -2 1203.99   71.48
   3  -9  -1  334.04   33.85
   3   9  -1  309.11   36.61
  -3   9   1  319.53   34.16
  -3  -9   1  280.37   37.78
   3   9  -1  296.27   37.14
   3  -9  -1  326.11   36.25
   3  -9   0  516.64   43.98
   3   9   0  448.75   43.05
  -3   9   0  624.49   45.65
  -3  -9   0  545.47   48.97
   3   9   0  511.67   47.82
   3  -9   0  513.73   47.82
   3   9   1  279.01   32.29
   3  -9   1  287.77   33.58
  -3   9  -1  326.90   35.19
  -3  -9  -1  308.03   34.21
   3   9   1  278.59   34.60
   3  -9   1  307.57   36.37
   3   9   2 1203.69   66.70
   3  -9   2 1083.08   65.70
  -3   9  -2 1285.97   68.02
  -3  -9  -2 1209.19   71.58
   3   9   2 1156.61   67.75
   3  -9   2 1196.94   72.26
   3   9   3  125.34   22.82
   3  -9   3  140.03   24.93
  -3   9  -3  169.21   26.36
  -3  -9  -3  160.64   26.50
   3   9   3  134.04   24.39
   3  -9   4  773.85   56.35
   3   9   4  770.09   52.25
  -3   9  -4  702.10   52.70
  -3  -9  -4  581.30   49.89
   3   9   4  708.47   50.89
   3  -9   4  696.95   56.31
   3   9   5  237.96   31.26
   3  -9   5  274.28   35.17
  -3   9  -5  248.19   30.51
  -3  -9  -5  193.66   30.15
   3  -9   5  210.63   30.90
   3   9   6 1350.43   68.93
   3  -9   6 1340.23   78.18
  -3   9  -6 1394.66   73.03
   3  -9   6 1297.32   81.14
   3   9   6 1215.52   66.53
   3   9   7  259.04   31.81
   3  -9   7  224.87   34.00
  -3   9  -7  255.75   31.29
  -3  -9  -7  151.28   25.11
   3   9   7  258.59   31.00
   3  -9   7  242.34   35.61
   3   9   8 1138.86   66.02
  -3   9  -8 1369.84   68.58
   3   9   8 1154.70   61.72
   3  -9   8 1291.24   83.80
  -3   9  -9   20.69   10.41
   3   9   9   30.16   10.27
   3   9   9   14.06    7.90
   3  -9   9   16.44   13.87
  -3   9 -10  423.55   35.86
   3   9  10  359.82   40.65
   3   9  10  340.97   28.36
  -3   9 -11    7.27    5.79
   3   9  11   23.46   13.37
   3  -9  11   22.62   15.21
   3   9  12  686.74   53.77
  -3  10  12   69.01   18.65
   3  10 -11  473.79   35.53
  -3 -10  11  553.27   66.55
   3  10 -10   80.20   18.28
   3  10 -10   61.88   15.93
   3  10 -10   45.66   21.02
  -3 -10  10   64.82   21.54
   3  10  -9  397.26   41.46
   3  10  -9  305.85   37.08
  -3  10   9  358.06   37.01
   3 -10  -9  385.63   32.83
  -3 -10   9  364.65   48.61
   3  10  -9  402.21   53.40
   3  10  -8   75.73   21.28
  -3  10   8   80.65   17.87
   3 -10  -8   47.70   12.22
  -3 -10   8   49.25   18.11
   3  10  -8   51.16   23.30
  -3  10   7  989.85   60.61
   3 -10  -7  955.96   59.56
  -3 -10   7  941.53   74.56
   3  10  -7  951.19   76.25
  -3  10   6  109.82   20.33
   3 -10  -6  125.31   23.29
   3  10  -6  112.53   27.81
   3 -10  -6   62.68   13.74
  -3  10   5 2108.72   88.46
   3 -10  -5 1852.87   60.17
  -3 -10   5 2028.91  105.26
   3 -10  -5 2046.19   92.47
   3  10  -5 2030.05  107.10
   3  10  -4   54.39   16.42
   3 -10  -4   22.36    8.88
  -3  10   4   44.13   12.92
   3 -10  -4   45.27   16.69
  -3 -10   4   51.19   16.77
   3  10  -4   66.74   16.41
   3  10  -3  991.89   69.68
  -3  10   3 1095.49   64.45
   3 -10  -3  952.81   56.49
  -3 -10   3  942.73   72.69
   3 -10  -3  961.52   66.54
   3  10  -3 1093.10   75.13
   3 -10  -2  302.56   32.12
   3  10  -2  261.35   33.96
  -3  10   2  270.66   31.25
  -3 -10   2  232.44   34.96
   3 -10  -2  269.58   32.86
   3  10  -2  251.59   36.71
   3  10  -1 2001.57   93.26
  -3  10   1 1980.73   87.57
  -3 -10   1 1889.66   97.32
   3 -10  -1 2201.13   98.97
   3  10  -1 1980.95   97.36
   3 -10   0 1599.01   80.83
   3  10   0 1295.44   73.92
  -3  10   0 1468.21   75.10
  -3 -10   0 1341.01   77.66
   3 -10   0 1442.03   81.75
   3  10   0 1330.66   80.90
   3 -10   1 2101.83   95.05
   3  10   1 1744.39   86.77
  -3  10  -1 1998.89   87.22
  -3 -10  -1 1855.82   91.82
   3 -10   1 1958.15   95.69
   3  10   1 1681.71   88.85
   3 -10   2  245.14   36.60
   3  10   2  201.82   29.39
  -3  10  -2  205.42   28.62
  -3 -10  -2  145.55   30.74
   3 -10   2  196.12   31.54
   3  10   2  205.54   30.78
   3  10   3 1184.68   68.49
  -3  10  -3 1197.67   68.98
  -3 -10  -3 1142.84   74.03
   3 -10   3 1102.51   74.49
   3  10   3 1067.83   70.65
  -3  10  -4   50.59   15.68
   3  10   4   28.46   13.82
   3 -10   4   22.40   11.60
   3 -10   4   43.43   16.82
   3 -10   5 1369.94   82.50
   3  10   5 2172.63   93.12
  -3 -10  -5 1295.90   72.13
   3  10   5 2048.35   91.63
   3 -10   5 2096.21  106.93
   3  10   6   80.81   20.53
   3 -10   6   35.23   11.93
  -3 -10  -6   34.94   15.85
   3  10   6   77.60   18.84
   3  10   7  753.18   57.87
   3  10   7  786.34   56.07
   3 -10   7  909.31   71.99
  -3  10  -8   74.89   18.83
   3  10   8   57.89   17.59
   3  10   8   56.48   15.77
   3 -10   8   68.34   22.47
  -3  10  -9  404.28   38.06
   3  10   9  402.32   40.66
   3  10   9  332.44   33.98
   3 -10   9  403.70   50.25
  -3  10 -10   71.76   15.78
   3  10  10   73.04   17.40
   3 -10  10   81.28   24.67
   3  10  10   70.81   15.85
  -3  10 -11  509.46   34.71
  -3  11  12  360.79   41.48
  -3  11  11  147.94   26.57
   3  11 -11  172.48   25.79
  -3  11  10  655.40   51.70
  -3 -11  10  542.44   66.42
   3 -11 -10  513.29   28.92
   3  11 -10  624.38   71.13
   3  11  -9  257.26   36.81
  -3  11   9  260.06   32.43
   3  11  -9  169.13   30.92
   3 -11  -9  274.23   31.05
   3  11  -8  384.82   48.24
   3  11  -8  387.95   42.97
  -3  11   8  546.59   46.42
  -3 -11   8  411.78   55.59
   3 -11  -8  326.09   43.51
   3  11  -8  463.87   56.06
   3  11  -7  237.00   39.00
   3  11  -7  142.93   28.54
  -3  11   7  296.32   34.76
   3 -11  -7  290.60   37.73
   3  11  -7  298.66   45.07
  -3 -11   7  259.54   43.10
   3  11  -6  960.63   69.36
  -3 -11   6  947.74   78.78
   3  11  -6 1022.24   80.20
   3  11  -5   72.11   21.98
   3 -11  -5   72.73   12.59
   3  11  -5   81.16   23.16
  -3 -11   5   61.66   22.86
   3  11  -4 1289.37   83.68
  -3 -11   4 1325.55   91.15
   3 -11  -4 1531.44   85.19
   3  11  -4 1417.14   90.47
   3 -11  -4 1332.42   81.48
   3  11  -3  446.25   48.86
   3 -11  -3  404.24   36.46
  -3 -11   3  465.66   51.97
   3  11  -3  430.31   51.31
   3 -11  -3  429.77   47.15
   3  11  -2 1393.17   81.80
   3 -11  -2 1543.88   77.48
  -3 -11   2 1277.24   86.16
   3  11  -2 1428.71   88.77
   3 -11  -1  552.21   48.49
   3  11  -1  466.35   47.97
  -3 -11   1  526.83   53.67
   3  11  -1  501.06   51.50
   3 -11  -1  548.48   53.38
   3 -11   0  160.99   29.17
   3  11   0  173.66   31.67
  -3 -11   0  136.31   30.03
   3 -11   0  215.88   34.19
   3 -11   1  382.61   41.51
  -3  11  -1  580.11   48.72
  -3 -11  -1  489.85   54.52
   3  11   1  478.23   49.70
   3 -11   1  562.54   57.38
  -3  11  -2 1329.53   77.17
   3 -11   2 1291.64   84.71
  -3  11  -3  357.37   42.54
  -3 -11  -3  336.72   42.34
   3  11   3  413.20   44.86
   3 -11   3  409.36   45.75
   3 -11   4 1526.27   90.41
  -3  11  -4 1385.98   78.65
  -3 -11  -4 1244.08   77.50
   3  11   4 1549.87   84.17
   3 -11   4 1411.18   88.43
  -3  11  -5   74.27   19.18
   3 -11   5   83.16   24.79
   3  11   5   71.66   21.94
  -3  11  -6 1123.58   71.55
   3 -11   6 1092.67   80.75
   3  11   6 1061.80   67.26
  -3  11  -7  212.59   32.12
   3 -11   7  221.84   39.97
   3  11   7  176.93   30.37
  -3  11  -8  379.10   42.60
   3  11   8  399.29   41.63
   3  11   8  388.89   42.05
  -3  11  -9  245.09   32.90
   3  11   9  242.88   34.67
   3 -11   9  297.37   44.49
   3  11  10  608.60   50.45
   3 -11  10  605.46   65.42
  -3  11 -11  131.66   21.21
   3  11  11  182.92   29.47
   3  12 -11  402.80   41.77
  -3  12  11  456.83   46.68
  -3  12  10   87.79   21.14
   3  12 -10   30.30   17.08
   3  12 -10   72.23   22.11
   3  12  -9  161.37   36.07
  -3  12   9  225.81   32.54
   3 -12  -9  185.83   26.38
   3  12  -9  267.08   44.40
  -3 -12   9  171.96   40.64
   3  12  -8  265.49   40.01
  -3  12   8  229.00   33.03
   3 -12  -8  201.75   30.79
   3  12  -8  206.28   41.44
  -3 -12   8  153.83   44.67
  -3  12   7  648.96   53.30
  -3 -12   7  602.76   70.00
   3 -12  -7  686.44   59.62
   3  12  -7  651.90   69.04
  -3  12   6   23.08   11.25
   3  12  -6   30.99   14.88
  -3 -12   6   28.29   21.31
   3  12  -6   21.56   15.44
   3 -12  -5  777.53   44.18
  -3  12   5  771.68   60.22
   3  12  -5  862.56   68.84
  -3 -12   5  794.76   74.34
   3  12  -5  780.22   75.75
  -3  12   4  161.14   26.36
   3 -12  -4  113.35   20.50
   3  12  -4  140.07   28.56
   3  12  -4  129.62   30.53
  -3 -12   4  125.13   30.80
   3  12  -3 2333.70  115.74
  -3  12   3 2430.14  103.64
  -3 -12   3 2307.16  120.59
   3  12  -3 2368.62  122.20
   3  12  -2  194.55   37.27
   3 -12  -2  160.37   26.55
  -3  12   2  244.71   34.28
  -3 -12   2  242.25   41.75
   3  12  -2  246.98   39.44
   3 -12  -2  236.76   38.65
   3  12  -1  670.16   64.07
  -3  12   1  836.06   62.01
   3 -12  -1  843.78   62.94
  -3 -12   1  757.26   67.62
   3  12  -1  664.38   64.82
   3 -12  -1  780.92   69.07
  -3  12   0  127.83   25.39
   3  12   0   86.04   23.09
  -3 -12   0   50.88   21.78
   3  12   1  803.18   64.40
  -3  12  -1  766.44   59.81
  -3 -12  -1  745.92   69.04
   3  12   1  770.66   66.38
   3 -12   1  769.12   68.94
  -3  12  -2  295.38   39.72
   3  12   2  325.94   39.44
   3 -12   2  306.82   43.64
  -3 -12  -2  152.00   28.77
   3  12   2  281.38   38.79
   3 -12   2  267.71   43.31
  -3  12  -3 2186.52  101.25
   3  12   3 2059.69  102.27
   3  12   3 2198.57  106.99
   3 -12   3 2314.06  118.50
  -3  12  -4  196.67   30.55
   3  12   4  155.46   28.72
   3  12   4  144.07   28.71
   3 -12   4  157.90   31.98
  -3  12  -5  820.96   64.15
   3  12   5  787.59   63.01
   3 -12   5  864.45   75.58
   3  12   5  705.48   62.40
  -3  12  -6   34.67   12.63
   3  12   6   22.15   14.66
   3  12   6   45.99   15.80
   3 -12   6   49.13   18.01
  -3  12  -7  718.81   60.61
   3  12   7  607.72   58.89
   3  12   7  694.60   57.21
   3 -12   7  770.61   73.26
  -3  12  -8  179.45   29.49
   3  12   8  207.18   33.68
   3 -12   8  212.96   41.67
  -3  12  -9  232.73   34.34
   3  12   9  150.97   30.29
   3 -12   9  192.46   42.26
   3  12   9  158.43   30.03
  -3  12 -10   57.96   16.93
   3  12  10   72.99   21.65
   3  12  11  324.46   44.83
  -3  13  10  528.99   52.17
   3  13 -10  539.38   55.27
   3  13  -9   55.75   24.48
  -3  13   9   50.30   15.96
   3  13  -9   63.92   27.24
   3  13  -8  252.31   42.76
  -3  13   8  321.38   40.75
   3 -13  -8  289.67   41.97
   3  13  -8  329.72   54.75
  -3 -13   8  203.11   53.55
   3  13  -7  202.84   39.70
  -3  13   7  239.08   33.68
   3 -13  -7  261.31   35.25
   3  13  -7  205.30   41.71
  -3 -13   7  158.56   40.09
  -3  13   6  485.07   50.11
   3  13  -6  435.52   55.69
   3  13  -6  490.03   61.70
  -3 -13   6  369.41   56.43
  -3  13   5   -1.05   10.52
   3  13  -5   22.00   15.00
  -3 -13   5   20.85   17.62
   3  13  -5   30.39   14.96
   3  13  -4 1034.28   80.43
   3 -13  -4 1027.56   60.96
  -3  13   4  980.61   70.02
   3  13  -4  935.38   81.98
   3 -13  -3  117.21   22.14
   3  13  -3   78.82   30.56
  -3  13   3  132.70   26.20
  -3  13   2 1111.60   76.94
   3  13  -2 1020.84   80.83
   3 -13  -2 1158.27   78.59
  -3 -13   2 1072.13   86.80
   3  13  -1  230.70   38.41
  -3  13   1  232.66   34.72
   3 -13  -1  122.80   23.13
   3  13  -1  199.00   38.35
  -3 -13   1  239.87   39.94
  -3  13   0  565.89   54.95
   3  13   0  446.97   55.50
   3  13   0  499.35   56.56
   3 -13   0  502.94   60.43
  -3  13  -1  210.00   33.08
   3  13   1  181.01   34.72
   3  13   1  180.42   34.08
   3 -13   1  231.22   39.11
  -3  13  -2 1130.77   78.89
   3  13   2 1048.78   75.60
   3 -13   2 1215.44   92.11
   3  13   2  925.99   75.21
  -3  13  -3  135.09   26.70
   3  13   3  100.50   31.57
   3  13   3   93.52   27.44
  -3  13  -4 1010.39   75.00
   3  13   4  888.64   70.49
   3  13   4  879.38   72.22
  -3  13  -5   21.74   14.73
   3  13   5   19.95   13.43
   3 -13   5   19.93   15.49
   3  13   5   14.33    9.81
  -3  13  -6  556.61   55.19
   3  13   6  362.53   47.99
   3 -13   6  475.65   60.27
  -3  13  -7  221.53   37.70
   3  13   7  151.03   31.07
   3  13   7  142.07   29.11
   3 -13   7  201.57   42.42
  -3  13  -8  296.50   39.64
   3  13   8  295.98   39.84
   3 -13   8  372.90   57.26
   3  13   8  303.54   40.51
  -3  13  -9   77.69   22.51
   3  13   9   91.25   27.92
  -3  13 -10  463.07   48.40
   3  13  10  323.45   49.41
  -3  14  10   69.57   22.62
  -3  14   9  699.37   62.39
   3  14  -9  718.76   69.27
   3  14  -8   73.14   29.34
   3  14  -8  121.07   37.55
   3  14  -7  304.68   49.46
  -3 -14   7  206.98   46.18
  -3  14   6  135.61   27.76
  -3 -14   6  116.34   34.48
  -3  14   5  830.46   67.78
  -3 -14   5  682.75   79.18
   3  14  -5  838.57   80.97
  -3  14   4   42.90   17.65
   3  14  -4   41.86   17.16
   3 -14  -4   48.89   17.94
  -3 -14   4   20.10   17.48
   3  14  -4   41.98   18.41
  -3  14   3  595.34   57.75
   3  14  -3  482.52   58.15
   3 -14  -3  527.71   49.65
   3  14  -3  478.09   61.66
  -3  14   2  230.92   35.69
   3 -14  -2  122.04   26.26
   3  14  -2  103.12   38.49
   3  14  -2  200.97   39.00
  -3  14   1 1495.78   90.46
   3  14  -1 1231.12   89.27
   3 -14  -1 1396.10   90.52
   3  14  -1 1356.14   97.04
  -3  14   0   31.51   14.92
   3  14   0   28.23   14.04
   3  14   0   37.10   20.23
  -3  14  -1 1238.92   84.12
   3  14   1 1466.05   97.01
   3  14   1 1351.52   96.14
  -3  14  -2  274.44   40.74
   3  14   2  178.46   39.35
   3  14   2  250.12   42.09
  -3  14  -3  480.83   50.93
   3  14   3  481.66   59.88
   3  14   3  513.11   57.38
  -3  14  -4   34.31   14.95
   3  14   4    7.56   14.22
   3 -14   4   25.54   24.25
   3  14   4   44.32   19.90
  -3  14  -5  714.64   65.14
   3  14   5  668.43   64.34
   3  14   5  697.96   66.57
   3 -14   5  652.71   70.54
   3  14   6  116.41   30.01
   3  14   6  146.33   30.37
   3 -14   6  151.28   39.79
   3  14   7  214.69   35.79
   3 -14   7  200.28   44.06
  -3  14  -9  784.98   67.96
   3  14   9  642.20   68.24
   3  14  10   50.42   24.22
  -3  15   7  101.80   25.60
   3  15  -7  135.54   44.63
  -3  15   6  248.19   40.52
   3  15  -6  296.47   54.49
   3  15  -5   67.54   25.63
  -3  15   5   74.17   26.64
   3  15  -5   75.73   29.96
   3  15  -4  238.73   44.17
   3 -15  -4  176.99   28.31
   3  15  -4  275.84   50.60
  -3  15   3   29.37   16.51
   3  15  -3   36.71   19.08
   3 -15  -3   49.60   24.97
   3  15  -3   32.91   24.07
  -3  15   2  523.95   57.37
   3  15  -2  418.14   57.44
   3  15  -2  379.64   55.76
   3  15  -1  418.35   58.81
   3  15  -1  561.28   66.04
  -3  15   0 1584.67   98.80
   3  15   0 1546.90  107.32
  -3  15  -1  550.50   56.51
   3  15   1  634.56   67.70
  -3  15  -2  355.65   49.70
  -3  15  -3   34.36   18.54
   3  15   3   13.55   14.60
  -3  15  -4  231.85   40.48
   3  15   4  260.33   47.36
   3  15   4  250.95   45.53
  -3  15  -5   79.49   26.19
   3  15   5   68.02   23.30
  -3  15  -6  319.59   47.20
   3  15   6  244.12   45.74
   3  15   7  135.77   31.35
   3  16  -6  167.09   47.79
   3  16  -5   68.48   32.82
   3  16  -4   34.51   26.68
   3  16  -3  242.35   49.51
   3  16  -2   50.71   18.79
   3  16   0  147.82   36.82
   3  16   1  868.33   82.95
   3  16   2   25.21   18.47
   3  17  -5  125.81   39.56
   3  17  -4  100.05   35.88
   3  17  -3  -43.33   32.40
   3  17  -2  323.23   60.70
  -4   0  13   -1.43    8.97
  -4   0  12  638.08   44.08
   4   0 -12  555.20   27.48
  -4   0  11    2.84    7.55
  -4   0  10  431.23   36.56
   4   0 -10  439.21   35.35
  -4   0   9   -1.52    7.83
  -4   0   9    6.69    6.58
   4   0  -9   -1.80    5.23
  -4   0   8  490.48   37.85
  -4   0   8  463.26   38.85
   4   0  -8  548.31   39.47
   4   0  -7   -1.38    2.42
  -4   0   7   -1.17    4.22
  -4   0   7    3.11    4.61
   4   0  -7   -1.67    3.12
   4   0  -6  238.68   20.77
  -4   0   6  294.00   26.73
  -4   0   6  274.11   28.40
  -4   0   5   -2.85    4.47
   4   0  -5    2.80    4.24
  -4   0   5   12.31    6.63
   4   0  -5    1.40    4.02
  -4   0   4 7886.82  136.99
   4   0  -4 7663.13  129.97
  -4   0   4 8537.05  152.96
   4   0  -4 8452.36  150.89
  -4   0   3   -2.06    2.78
   4   0  -3    5.94    6.06
   4   0  -3    6.33    5.71
  -4   0   3   -9.80    7.10
  -4   0   2 5380.75  109.54
   4   0  -2 5322.12  112.81
   4   0  -2 5437.73  119.18
  -4   0   2 5591.30  122.02
   4   0  -1    0.70    4.15
  -4   0   1    2.11    4.97
  -4   0   1   -1.86    3.12
   4   0  -1    4.17    3.54
  -4   0   0  110.87   17.55
   4   0   0  119.51   17.64
   4   0   0   94.65   16.22
  -4   0   0  111.34   16.93
   4   0   1    0.90    2.84
  -4   0  -1    1.38    2.15
  -4   0  -1    8.59    5.26
  -4   0  -2 5273.57  109.03
   4   0   2 5072.29  115.93
  -4   0  -2 5070.55  118.19
   4   0   3   -0.55    2.66
  -4   0  -3    1.90    3.45
   4   0   3   -2.43    5.27
  -4   0  -3    0.34    3.59
   4   0   4 8484.17  139.23
   4   0   4 8395.41  148.15
   4   0   5    0.06    3.43
   4   0   6  273.49   26.87
   4   0   7    8.51    7.26
   4   0   7    2.66    5.15
   4   0   8  362.96   31.22
   4   0   8  383.76   34.78
   4   0   9   -8.52    8.79
   4   0  10  412.62   36.55
   4   0  10  404.56   34.94
   4   0  11    5.18   10.71
   4   0  11    3.65    6.67
   4   0  12  693.23   49.94
   4   0  12  567.10   37.22
   4   0  12  706.33   43.36
   4   0  13  -13.10   13.65
   4   0  13   -2.97    6.52
   4   0  13    3.14    6.54
   4   0  14  173.89   14.02
  -4  -1  14   50.54   13.29
  -4  -1  13  506.00   39.45
   4   1 -12   76.24   13.82
   4  -1 -11  686.08   37.11
   4   1 -11  677.23   45.04
  -4   1  10   46.00   12.04
  -4   1  10   47.98   12.92
  -4  -1  10   28.24    8.75
   4  -1 -10   52.15   13.34
   4   1 -10   35.63   11.68
  -4   1   9  697.74   44.01
  -4  -1   9  798.44   51.09
  -4   1   9  733.59   46.71
   4  -1  -9  791.16   46.80
   4   1  -9  850.07   51.70
  -4   1   8  102.97   17.49
   4  -1  -8  107.92   18.52
  -4  -1   8  104.03   18.66
  -4   1   8  113.32   17.98
   4  -1  -7  791.64   23.17
   4   1  -7  950.51   38.49
  -4   1   7  926.86   52.40
  -4  -1   7  945.38   54.56
  -4   1   7  851.36   45.96
  -4  -1   7  917.18   50.36
   4  -1  -6  329.91   23.02
   4  -1  -6  392.84   24.79
   4   1  -6  408.79   28.89
  -4   1   6  455.32   36.36
  -4   1   6  469.74   32.98
   4   1  -6  413.86   29.31
  -4  -1   6  424.04   33.13
   4  -1  -5 2915.32   75.24
   4   1  -5 3031.40   82.52
  -4  -1   5 3130.84   95.55
   4   1  -5 3151.19   95.04
  -4  -1   5 2967.50   85.96
   4  -1  -5 2704.12   71.44
  -4   1   5 2972.59   82.55
   4   1  -5 2538.55   73.96
   4   1  -4  265.70   25.17
   4   1  -4  278.45   25.40
  -4   1   4  259.36   25.16
  -4  -1   4  311.52   27.47
   4  -1  -4  280.54   24.50
  -4  -1   4  291.29   28.87
   4  -1  -4  264.61   27.08
   4   1  -4  272.84   27.83
  -4   1   4  267.74   28.01
   4   1  -3 4831.14  105.81
   4  -1  -3 4640.25  101.56
  -4   1   3 4424.10  100.09
  -4  -1   3 4515.20  103.94
   4   1  -3 4464.35  111.47
   4  -1  -3 4826.39  111.71
  -4  -1   3 4775.70  115.01
  -4   1   3 4904.96  117.16
   4   1  -2  332.45   28.00
  -4  -1   2  309.94   28.43
  -4   1   2  298.57   26.49
   4  -1  -2  320.85   27.94
  -4   1   2  341.13   30.77
   4   1  -2  354.85   30.93
   4  -1  -2  297.29   28.04
  -4  -1   2  344.12   31.03
   4   1  -1 2796.85   79.94
  -4   1   1 2676.10   76.57
   4  -1  -1 2986.39   83.21
  -4  -1   1 2804.65   80.05
   4   1  -1 2653.55   83.59
  -4   1   1 2836.93   87.16
   4  -1  -1 2669.09   84.27
  -4  -1   1 2729.72   85.67
  -4  -1   0 2349.20   73.80
   4   1   0 2488.89   75.90
  -4   1   0 2416.90   73.54
   4  -1   0 2557.05   77.42
   4  -1   0 2407.69   79.10
  -4   1   0 2240.54   78.30
   4   1   0 2361.35   78.13
  -4  -1   0 2231.41   79.34
  -4  -1  -1 2727.89   77.56
   4   1   1 2685.50   79.01
  -4   1  -1 2832.14   77.51
   4  -1   1 2447.73   79.02
  -4  -1  -1 2847.69   86.56
  -4   1  -1 2896.56   89.20
   4  -1   1 2443.64   79.27
   4  -1   2  356.83   29.71
  -4   1  -2  331.15   26.86
   4   1   2  330.06   28.18
  -4   1  -2  353.40   32.38
   4   1   2  292.49   28.20
   4  -1   2  342.29   29.94
  -4  -1  -2  378.88   33.08
   4  -1   3 4903.07  107.92
  -4   1  -3 4488.65   97.82
   4   1   3 4759.21  103.85
   4   1   3 4524.14  106.87
   4  -1   3 4403.29  109.50
   4   1   4  296.64   26.24
  -4   1  -4  254.87   23.60
   4  -1   4  199.46   24.86
  -4  -1  -4  235.46   26.38
   4   1   4  307.01   27.68
   4   1   5 3045.89   83.55
   4   1   5 3080.58   89.00
   4  -1   5 2932.90   88.83
   4  -1   6  456.56   35.25
   4   1   6  426.52   33.16
   4  -1   6  380.98   34.22
   4   1   7  815.82   43.93
   4  -1   7  912.19   51.21
   4   1   7  836.07   46.70
   4  -1   7  859.94   50.06
   4   1   8  119.18   17.49
   4  -1   8  109.17   18.93
   4   1   8  109.46   16.15
   4  -1   8  129.26   19.27
   4   1   9  584.63   38.52
   4  -1   9  693.07   45.33
   4  -1   9  667.14   44.29
   4  -1  10   30.93   11.36
   4   1  10   34.38   12.25
   4   1  10   45.57   11.65
   4  -1  10   45.42   12.83
   4   1  11  518.77   39.34
   4  -1  11  556.37   43.40
   4  -1  11  536.10   40.62
   4   1  11  576.00   37.64
   4  -1  11  633.56   44.46
   4   1  12   75.28   16.05
   4  -1  12   41.53   16.33
   4  -1  12   54.45   14.58
   4  -1  12   59.27   14.49
   4   1  12   62.69   13.21
   4   1  12   57.08   12.37
   4   1  13  516.89   43.47
   4   1  13  404.98   27.72
   4   1  13  480.83   28.16
   4  -1  13  510.82   37.09
   4  -1  14   54.42   10.08
   4  -1  14   79.23   13.69
  -4  -2  14  221.06   25.71
  -4  -2  13   42.66   14.86
  -4   2  12  569.12   42.51
  -4  -2  12  572.52   45.28
   4   2 -12  596.47   43.18
  -4   2  11  154.59   22.60
  -4  -2  11  147.37   23.38
   4  -2 -11  141.25   15.18
   4   2 -11  160.46   23.65
  -4   2  10  720.82   44.73
  -4  -2  10  849.73   55.16
   4  -2 -10  784.39   40.97
  -4   2   9  126.72   19.00
  -4   2   9  137.79   20.28
  -4  -2   9  149.90   22.90
   4  -2  -9  139.33   18.74
   4   2  -9  145.47   22.19
   4   2  -8  268.40   17.97
  -4  -2   8  473.45   41.28
   4  -2  -8  394.04   33.29
  -4   2   8  402.80   34.21
   4   2  -8  305.38   18.84
  -4   2   8  405.74   31.36
   4   2  -7  391.40   28.08
  -4   2   7  413.77   31.71
   4   2  -7  429.87   29.20
  -4  -2   7  458.10   39.30
  -4   2   7  459.35   36.90
   4  -2  -7  471.51   35.89
   4  -2  -6 2496.74   59.00
   4  -2  -6 2811.56   62.66
   4   2  -6 2694.25   77.24
   4   2  -6 2553.83   74.08
  -4   2   6 2898.64   82.20
  -4  -2   6 3016.10   99.47
  -4   2   6 2981.46   91.60
   4   2  -6 2706.65   92.32
   4   2  -5   79.51   13.76
   4  -2  -5   80.77   12.41
   4   2  -5   76.94   14.45
  -4   2   5   92.10   14.70
  -4  -2   5   94.36   17.08
  -4   2   5   91.56   16.03
   4   2  -5   90.62   16.88
   4   2  -4 1500.33   61.46
   4   2  -4 1417.80   57.87
   4  -2  -4 1536.88   56.39
  -4   2   4 1492.46   58.59
  -4   2   4 1582.60   66.32
  -4  -2   4 1620.73   71.48
   4  -2  -4 1493.84   63.46
   4   2  -4 1497.33   66.62
  -4   2   3  208.38   23.34
   4   2  -3  291.73   27.42
   4  -2  -3  247.54   24.04
  -4  -2   3  261.95   29.77
   4   2  -3  258.32   27.76
   4  -2  -3  274.02   27.15
  -4   2   3  258.50   27.50
  -4   2   2 1350.75   56.30
   4   2  -2 1540.68   61.26
   4  -2  -2 1452.80   58.16
   4  -2  -2 1524.88   64.42
  -4  -2   2 1699.38   70.26
  -4   2   2 1643.22   68.04
   4   2  -2 1455.06   63.55
  -4   2   1 1166.82   50.72
   4   2  -1 1153.21   53.65
   4  -2  -1 1187.58   52.46
  -4  -2   1 1252.02   60.01
   4   2  -1 1171.84   56.40
  -4   2   1 1176.11   57.26
   4  -2  -1 1085.38   53.97
   4   2   0 6502.29  125.33
  -4   2   0 6730.48  123.19
   4  -2   0 6923.89  130.15
   4   2   0 6695.78  135.65
  -4   2   0 6670.45  138.33
   4  -2   0 6520.86  131.73
  -4  -2   0 6284.54  132.66
   4   2   1 1143.88   52.45
  -4   2  -1 1163.78   50.92
   4  -2   1 1182.62   55.11
   4  -2   1 1097.98   54.64
  -4  -2  -1 1163.47   56.65
   4   2   1 1040.58   53.30
  -4   2  -2 1368.41   57.08
   4  -2   2 1617.14   64.31
   4   2   2 1636.61   61.22
   4  -2   2 1422.16   62.22
  -4  -2  -2 1392.17   62.47
   4   2   2 1402.04   61.78
  -4   2  -3  318.32   26.63
   4   2   3  294.03   26.22
   4   2   3  271.25   26.73
   4  -2   3  281.63   28.08
  -4   2  -4 1572.86   58.03
   4  -2   4 1604.23   65.33
   4   2   4 1494.44   58.76
   4   2   4 1367.55   60.92
  -4  -2  -4 1383.93   62.14
   4  -2   4 1539.13   65.88
  -4   2  -5   78.56   13.33
   4  -2   5  107.03   17.15
   4  -2   5   83.79   17.81
   4   2   5   72.28   15.11
  -4  -2  -5   71.88   15.64
   4  -2   6 2843.84   89.34
   4  -2   6 2904.61   93.05
   4   2   6 2910.94   86.48
   4  -2   7  468.23   36.55
   4  -2   7  433.92   36.66
   4   2   7  402.75   33.53
   4   2   8  414.36   31.66
   4  -2   8  455.53   38.54
   4  -2   8  448.53   37.53
   4   2   8  432.41   33.64
   4   2   9  114.26   17.36
   4  -2   9  148.91   21.87
   4   2   9  152.85   20.38
   4  -2   9  128.36   20.37
   4   2  10  637.32   41.19
   4  -2  10  586.66   44.10
   4  -2  10  686.87   47.18
   4   2  10  672.27   39.70
   4  -2  10  740.79   51.70
   4   2  11   62.01   15.32
   4  -2  11  110.97   18.02
   4  -2  11  106.98   19.61
   4   2  11  107.48   15.71
   4  -2  11  139.16   22.75
   4   2  12  568.69   42.94
   4  -2  12  549.78   42.90
   4   2  12  446.98   28.86
   4   2  12  507.63   31.17
   4   2  13   50.82   14.57
   4  -2  13   52.93   14.19
   4   2  13   24.34    5.97
   4   2  13   26.42    5.04
   4  -2  13   44.35   12.50
   4  -2  14  202.54   24.20
   4  -2  14  256.64   28.03
   4  -2  15   55.00   11.12
  -4  -3  14   86.49   18.16
  -4   3  13  408.14   36.17
  -4  -3  13  393.42   39.66
   4   3 -13  343.37   32.10
  -4   3  12  163.86   23.62
  -4  -3  12  146.98   26.01
  -4   3  11  615.37   41.70
  -4  -3  11  717.57   53.83
   4  -3 -11  432.15   18.81
   4  -3 -11  412.36   19.06
   4   3 -11  712.53   54.16
  -4   3  10   48.91   12.61
  -4  -3  10   79.39   18.77
   4   3 -10   53.09   18.07
  -4  -3   9 1362.00   72.71
   4  -3  -9 1445.62   58.95
  -4   3   9 1284.23   57.65
   4   3  -8  772.44   38.27
  -4  -3   8  914.57   57.86
   4  -3  -8  869.02   47.91
   4   3  -8  821.24   37.69
  -4   3   8  847.90   46.01
   4   3  -7 3017.14   82.54
   4   3  -7 2735.68   77.18
  -4   3   7 2795.74   83.35
   4  -3  -7 3203.26   92.88
  -4  -3   7 3329.79  108.71
   4  -3  -6  330.80   20.29
   4  -3  -6  269.18   18.76
   4   3  -6  304.39   27.97
   4   3  -6  247.36   25.16
  -4   3   6  315.30   27.82
  -4  -3   6  325.12   33.58
  -4   3   6  352.18   32.24
   4   3  -6  361.61   35.05
   4   3  -5  609.54   40.58
   4  -3  -5  532.32   31.30
  -4   3   5  549.02   36.10
   4   3  -5  589.51   39.44
  -4  -3   5  670.59   47.05
  -4   3   5  601.59   41.40
   4   3  -5  635.19   45.95
   4   3  -4  149.41   22.36
   4  -3  -4  167.48   19.40
   4  -3  -4  193.96   23.08
  -4   3   4  188.19   23.62
  -4  -3   4  183.62   24.47
   4   3  -4  191.28   24.41
  -4   3   4  157.06   19.24
   4   3  -4  163.48   21.82
   4  -3  -3 1045.29   49.65
   4   3  -3  957.61   53.10
  -4   3   3 1047.33   48.94
   4  -3  -3 1099.91   55.32
  -4  -3   3 1059.07   58.30
  -4   3   3 1081.31   55.47
   4   3  -3 1092.03   57.66
  -4   3   2  195.30   21.68
   4  -3  -2  189.40   22.09
  -4  -3   2  243.31   27.68
   4   3  -2  225.00   25.65
   4  -3  -2  208.70   24.79
   4  -3  -1 2318.26   76.18
   4   3  -1 2325.52   75.87
  -4   3   1 2267.43   71.75
   4   3  -1 2282.49   80.37
  -4  -3   1 2298.70   82.71
   4  -3  -1 2179.17   77.57
  -4   3   0  143.38   18.07
   4  -3   0  160.89   20.77
  -4  -3   0  122.78   20.29
   4  -3   0  147.69   21.03
   4   3   1 2325.05   75.72
  -4   3  -1 2152.68   71.96
  -4  -3  -1 2218.41   81.19
   4   3   1 2246.88   78.23
   4   3   2  203.63   22.24
  -4   3  -2  218.97   22.67
   4  -3   2  209.10   25.83
   4   3   2  183.17   23.08
  -4  -3  -2  135.51   20.74
   4   3   3 1095.45   51.07
  -4   3  -3 1067.05   50.67
   4  -3   3 1138.14   56.81
   4   3   3 1034.50   53.13
  -4  -3  -3  908.73   51.58
   4  -3   3 1114.26   58.48
   4  -3   4  204.15   24.21
  -4   3  -4  179.23   20.60
   4   3   4  152.97   21.94
   4  -3   4  189.92   25.35
  -4  -3  -4  190.63   23.30
   4  -3   5  592.80   41.88
  -4   3  -5  596.60   37.51
   4   3   5  573.02   39.48
   4  -3   5  629.84   44.72
  -4  -3  -5  507.19   38.03
  -4   3  -6  307.03   25.76
   4  -3   6  294.18   31.33
   4   3   6  284.71   28.46
   4  -3   6  319.85   34.60
   4  -3   7 2996.42   96.47
   4   3   7 2751.48   82.71
   4   3   7 2852.91   86.24
   4  -3   8  839.24   51.93
   4   3   8  828.68   45.77
   4   3   8  734.49   43.03
   4  -3   8  923.84   56.72
   4  -3   9 1309.99   67.45
   4  -3   9 1299.87   67.95
   4   3   9 1290.69   56.57
   4  -3   9 1406.41   73.10
   4   3  10   45.87   13.33
   4  -3  10   93.52   19.71
   4  -3  10   79.03   16.52
   4  -3  10   60.29   15.77
   4   3  10   70.94   13.28
   4  -3  11  485.35   44.47
   4   3  11  471.07   35.21
   4   3  11  532.46   33.34
   4  -3  11  569.72   45.37
   4  -3  11  530.96   46.37
   4  -3  12  109.45   23.36
   4   3  12  104.15   19.65
   4  -3  12  125.60   21.90
   4   3  12  108.80   13.74
   4  -3  12  114.87   22.05
   4   3  12  139.61   15.39
   4   3  13  375.57   36.96
   4  -3  13  358.95   35.74
   4  -3  13  440.95   41.32
   4  -3  14  122.47   23.08
  -4   4  13   18.12   10.27
  -4  -4  13    7.26   13.67
   4   4 -13    6.96   14.53
  -4   4  12  312.00   31.51
  -4  -4  12  321.73   38.40
   4   4 -12  288.71   37.48
  -4   4  11    7.71    6.40
   4   4 -11    2.65   10.87
  -4   4  10  906.85   50.18
  -4  -4  10 1029.87   66.72
   4  -4 -10  779.72   38.58
   4   4 -10 1005.93   65.91
   4  -4 -10  884.18   40.27
   4   4  -9   56.52    9.28
   4   4  -9   55.33    9.24
  -4   4   9   66.54   14.59
  -4  -4   9   78.46   19.59
   4  -4  -9   74.51   14.75
   4   4  -8 2540.07   75.47
   4   4  -8 2268.05   69.30
  -4   4   8 2489.96   80.73
  -4  -4   8 2813.53  105.32
   4  -4  -8 2121.48   78.76
   4   4  -7   91.83   16.25
  -4   4   7   82.64   14.24
   4   4  -7   83.40   16.16
  -4  -4   7   63.82   18.67
   4  -4  -7   70.11   15.40
   4   4  -7   85.57   18.97
   4  -4  -6  853.41   32.46
   4  -4  -6  912.34   32.39
   4   4  -6 1093.96   55.61
  -4   4   6 1103.30   52.86
  -4  -4   6 1234.19   67.67
   4   4  -6 1136.54   65.17
   4  -4  -5   57.22   11.10
   4   4  -5   63.13   13.44
  -4   4   5   62.14   13.29
  -4  -4   5   66.68   15.58
   4   4  -5   63.49   17.70
   4   4  -4  932.79   51.90
   4  -4  -4  933.26   46.14
  -4   4   4 1054.75   50.67
   4  -4  -4 1025.85   54.15
   4   4  -4  939.29   57.14
   4   4  -3   41.44   12.50
   4  -4  -3   67.56   12.55
  -4   4   3   65.26   13.59
   4   4  -3   69.32   14.01
   4  -4  -3   61.32   14.05
  -4  -4   3   68.04   15.36
   4   4  -3   54.30   15.67
   4  -4  -2 2554.88   79.76
   4   4  -2 2840.76   90.57
   4   4  -2 2763.31   93.47
   4  -4  -2 2810.08   90.59
  -4  -4   2 2951.44   98.66
  -4   4   2 2832.37   83.31
   4   4  -2 2882.66   89.91
   4  -4  -1  152.34   20.88
  -4   4   1  124.36   19.72
   4   4  -1  187.75   23.51
  -4  -4   1  155.85   22.91
   4  -4  -1  161.00   23.40
  -4   4   0 1234.60   55.96
   4   4   0 1255.86   58.72
  -4  -4   0 1265.97   61.40
   4  -4   0 1152.44   61.67
   4   4   0 1185.22   59.97
  -4   4  -1  128.49   20.57
   4   4   1  178.30   21.83
   4  -4   1  166.33   22.11
  -4  -4  -1  174.53   23.05
   4   4   1  170.34   22.39
  -4   4  -2 2734.57   83.19
   4  -4   2 2864.85   90.28
   4   4   2 2642.27   86.43
  -4  -4  -2 2729.49   91.93
   4   4   2 2758.60   88.19
   4  -4   2 2736.48   93.29
  -4   4  -3   45.21   12.74
   4  -4   3   77.35   15.59
   4   4   3   59.52   15.08
   4  -4   3   60.65   13.95
  -4  -4  -3   57.53   15.05
   4   4   3   55.34   13.38
  -4   4  -4  886.41   47.60
   4  -4   4  997.14   54.60
   4   4   4 1004.13   51.11
   4   4   4  988.67   53.15
   4  -4   4  965.12   57.19
  -4  -4  -4  885.39   50.84
   4   4   5   63.04   13.67
  -4   4  -5   42.27   10.83
   4  -4   5   58.09   13.25
  -4  -4  -5   42.48   11.82
   4  -4   5   49.96   14.38
   4   4   5   49.84   12.86
   4  -4   6 1139.75   65.88
   4   4   6 1161.55   55.51
   4   4   6 1107.58   52.94
   4  -4   6 1173.89   62.39
  -4   4  -6 1143.08   51.90
   4   4   7  113.93   17.13
  -4  -4  -7  127.72   20.38
   4  -4   7  101.26   20.46
  -4   4  -7  104.26   15.09
   4   4   7  129.48   19.17
   4  -4   7  116.21   20.70
   4   4   8 2451.15   78.78
   4  -4   8 2223.49   89.35
   4   4   9   75.63   16.45
   4  -4   9   84.13   19.87
   4  -4   9   94.85   19.72
   4  -4   9   97.47   19.78
   4   4   9   68.71   13.36
   4  -4  10  870.16   60.27
   4   4  10  767.51   46.38
   4  -4  10 1014.92   63.57
   4   4  10  936.81   47.51
   4  -4  10  973.74   63.02
   4   4  11    8.60    8.43
   4  -4  11    9.49   10.80
   4  -4  11   32.01   14.09
   4  -4  11   17.35    9.04
   4   4  11   16.78    7.29
   4   4  12  329.86   31.95
   4  -4  12  409.95   42.62
   4   4  13    6.91   11.53
   4  -4  13   22.46   14.84
   4  -4  13   42.60   17.00
  -4   5  13  410.30   38.47
  -4  -5  13  451.90   49.70
  -4   5  12   58.11   13.54
  -4  -5  12   60.51   18.94
   4   5 -12   41.96   14.57
  -4   5  11  593.80   41.90
  -4  -5  11  686.49   58.48
   4   5 -11  708.73   60.20
  -4   5  10   30.86   10.05
  -4  -5  10    9.03   10.95
   4  -5 -10   27.27   10.43
   4  -5 -10   24.58    7.47
  -4   5   9 1892.59   71.23
   4   5  -9 1458.40   53.52
  -4  -5   9 2145.84   99.17
   4  -5  -9 2013.91   69.47
   4  -5  -9 1614.58   64.47
   4   5  -8  483.78   37.58
  -4   5   8  533.09   39.01
   4   5  -8  517.25   36.48
  -4  -5   8  558.50   49.19
   4  -5  -8  667.09   42.65
   4   5  -8  548.46   49.09
   4   5  -7 1876.85   75.53
  -4   5   7 1715.32   68.17
   4   5  -7 1858.58   71.98
   4  -5  -7 1887.77   74.51
  -4  -5   7 1919.83   88.59
   4   5  -7 1956.59   90.83
   4   5  -6  108.48   19.49
   4  -5  -6   75.17    9.46
  -4   5   6  117.00   19.08
   4   5  -6  105.47   19.46
  -4  -5   6  120.57   22.86
   4   5  -6  111.20   21.69
   4  -5  -5  878.44   41.03
   4   5  -5  970.83   56.03
   4   5  -5  963.33   55.17
  -4   5   5  985.10   52.10
  -4  -5   5 1074.50   65.31
   4   5  -5 1036.75   63.18
   4  -5  -4   88.82   15.91
   4   5  -4   88.01   17.31
   4   5  -4   72.49   17.52
  -4   5   4  109.27   17.14
   4  -5  -4   96.21   18.02
  -4  -5   4  116.05   22.17
   4   5  -4   79.87   17.93
   4  -5  -3 1055.21   53.28
   4   5  -3 1063.52   58.98
   4   5  -3  954.38   55.97
  -4   5   3 1252.39   57.14
  -4  -5   3 1247.70   67.97
   4  -5  -3 1138.73   59.67
   4   5  -3 1106.56   63.67
   4   5  -2  147.25   22.18
   4  -5  -2  126.57   19.87
   4   5  -2  161.45   22.46
  -4   5   2  155.51   20.71
   4  -5  -2  134.94   21.29
  -4  -5   2  136.99   23.17
   4   5  -1 1241.27   62.15
   4   5  -1 1266.26   61.55
  -4   5   1 1196.12   58.19
  -4  -5   1 1267.41   67.29
   4  -5  -1 1335.16   65.54
   4   5  -1 1277.97   64.92
   4  -5   0  237.55   27.66
   4   5   0  247.74   28.45
  -4  -5   0  238.54   30.23
   4  -5   0  293.81   31.18
   4   5   0  289.33   29.50
  -4   5   0  221.70   27.28
   4  -5   1 1341.37   62.95
  -4  -5  -1 1288.72   64.67
   4  -5   1 1284.16   66.79
   4   5   1 1230.84   62.21
  -4   5  -1 1135.69   58.07
   4   5   1 1352.26   62.09
   4  -5   2  178.95   23.77
   4   5   2  132.73   21.06
   4  -5   2  173.58   24.75
  -4  -5  -2  135.39   21.47
  -4   5  -2  100.81   19.42
   4   5   2  166.90   21.85
   4  -5   3 1174.46   60.94
   4   5   3 1126.83   58.39
   4  -5   3 1217.05   65.76
  -4   5  -3 1048.87   54.43
   4   5   3 1232.36   57.23
  -4  -5  -4  108.61   20.26
   4   5   4   95.34   18.94
   4  -5   4   87.45   19.52
  -4   5  -4   78.63   15.91
   4   5   4   77.01   14.32
   4  -5   4   87.95   17.30
   4  -5   5  998.66   57.96
  -4  -5  -5  974.02   56.06
   4  -5   5 1077.01   63.09
   4   5   5 1039.89   54.84
   4   5   5 1014.34   53.83
  -4   5  -5  965.46   52.85
  -4  -5  -6   85.59   15.76
   4   5   6  117.69   18.94
   4  -5   6  108.24   22.10
   4   5   6   94.70   16.93
  -4   5  -6  143.90   20.44
   4  -5   6  111.27   20.03
   4  -5   7 1636.33   83.68
   4  -5   7 1742.15   83.87
   4   5   7 1586.56   64.83
  -4   5  -7 1633.98   64.83
   4   5   7 1633.47   68.51
   4  -5   7 1730.17   83.79
   4  -5   8  567.37   48.71
  -4   5  -8  508.27   32.97
   4   5   8  541.85   37.74
   4  -5   8  497.67   46.87
   4  -5   8  479.90   45.33
   4   5   8  548.43   39.50
   4  -5   9 1839.78   91.70
   4   5   9 1508.00   63.52
  -4   5  -9 1472.76   47.65
   4  -5   9 1888.44   90.44
   4   5   9 1754.32   67.08
   4  -5  10   22.46   12.11
   4   5  10   30.30   12.62
   4  -5  10   38.56   14.42
   4   5  10   30.47   10.01
   4  -5  10   27.34   13.46
   4  -5  11  611.89   53.45
   4  -5  11  604.05   53.51
   4   5  11  515.05   32.05
   4   5  12   33.67   12.42
   4   5  12   22.57    6.52
   4  -5  12   49.83   15.91
   4  -5  13  387.37   43.01
  -4   6  12  569.42   42.06
  -4  -6  12  609.97   56.38
   4   6 -12  640.78   60.29
  -4   6  11   69.89   15.26
  -4  -6  11   60.83   21.67
   4   6 -11   57.55   22.37
   4   6 -10  460.28   26.07
  -4   6  10  754.60   48.02
   4   6 -10  469.64   26.72
   4  -6 -10  757.89   36.87
   4   6  -9  141.81   19.65
   4   6  -9  130.02   18.90
  -4   6   9  122.26   18.38
   4  -6  -9  130.55   20.04
  -4  -6   9  102.59   26.21
   4  -6  -9  142.85   20.06
   4   6  -9  119.10   26.07
   4   6  -8  918.73   53.89
  -4   6   8  975.21   53.75
   4   6  -8  851.51   52.09
   4  -6  -8  944.55   54.07
  -4  -6   8 1006.14   70.25
   4   6  -8  965.76   67.75
   4   6  -7  162.23   25.65
   4   6  -7  132.65   22.63
  -4   6   7  199.76   25.48
  -4  -6   7  171.22   30.05
   4  -6  -7  185.21   24.47
   4   6  -7  169.77   30.14
   4   6  -6 1631.32   76.70
   4  -6  -6 1157.60   34.64
   4   6  -6 1277.13   65.94
  -4   6   6 1748.01   71.14
   4  -6  -6 1763.55   76.14
  -4  -6   6 1668.84   87.82
   4   6  -6 1770.57   87.75
   4  -6  -5   36.23    9.33
   4   6  -5   47.00   13.56
   4   6  -5   50.56   13.35
  -4   6   5   28.04   10.18
  -4  -6   5   76.95   19.79
   4   6  -5   44.27   13.68
   4  -6  -4 1147.42   52.50
   4   6  -4 1216.04   64.52
  -4   6   4 1206.49   59.44
  -4  -6   4 1302.63   73.38
   4  -6  -4 1284.04   65.26
   4   6  -4 1183.59   69.44
   4   6  -3  514.69   42.61
  -4   6   3  548.59   41.37
   4   6  -3  454.49   39.23
  -4  -6   3  521.20   46.90
   4  -6  -3  586.16   45.22
   4  -6  -2 2041.75   77.91
   4   6  -2 2031.53   82.69
   4   6  -2 2153.64   84.93
  -4   6   2 2254.27   83.42
  -4  -6   2 2363.69   94.96
   4  -6  -2 2070.78   85.27
   4   6  -2 2069.20   88.14
   4   6  -1  596.07   44.84
   4  -6  -1  627.33   44.43
   4   6  -1  568.91   45.67
  -4   6   1  688.28   46.05
   4  -6  -1  693.06   49.31
  -4  -6   1  600.24   47.89
   4   6  -1  712.76   51.34
   4   6   0 3810.60  111.85
   4  -6   0 3600.93  109.22
   4   6   0 3575.73  104.77
  -4   6   0 3588.86  105.41
   4  -6   0 3610.95  115.15
  -4  -6   0 3435.78  110.69
   4   6   0 3746.64  114.32
   4  -6   1  679.32   48.89
   4   6   1  682.36   48.16
  -4   6  -1  625.67   45.12
   4  -6   1  652.02   49.18
  -4  -6  -1  636.82   48.52
   4   6   1  667.46   47.91
   4  -6   2 2400.13   91.18
  -4   6  -2 2215.98   81.76
  -4  -6  -2 2302.05   89.69
   4  -6   2 2137.48   93.84
   4   6   2 2188.60   85.69
   4  -6   3  571.06   45.40
  -4   6  -3  540.84   41.33
   4  -6   3  529.03   46.39
   4   6   3  553.98   44.29
   4  -6   4 1164.44   67.39
  -4   6  -4 1142.08   59.89
  -4  -6  -4 1032.18   60.44
   4  -6   4 1191.39   69.09
   4   6   4 1051.82   60.26
   4  -6   5   39.27   14.24
   4   6   5   33.61    9.49
  -4   6  -5   36.90   11.69
   4  -6   5   47.60   14.56
  -4  -6  -5   20.96    9.71
   4   6   5   42.78   12.38
   4  -6   6 1683.24   82.18
  -4   6  -6 1545.58   66.03
   4   6   6 1391.61   64.47
   4  -6   6 1748.73   86.57
  -4  -6  -6 1581.50   71.88
   4   6   6 1563.37   70.62
   4  -6   6 1705.09   87.36
   4   6   7  173.06   23.10
  -4   6  -7  195.37   24.03
   4  -6   7  202.13   30.99
   4  -6   7  192.77   30.45
  -4   6  -8  969.84   50.37
   4   6   8  917.27   51.34
   4  -6   8  986.24   66.87
   4   6   8  885.35   51.44
   4  -6   8 1004.39   70.63
  -4   6  -9  128.19   16.34
   4  -6   9  135.09   25.48
   4   6   9  129.54   20.64
   4  -6   9  143.68   25.66
   4   6   9  118.60   18.17
   4  -6   9  120.85   25.73
   4  -6  10  740.24   59.61
   4  -6  10  680.79   58.25
   4   6  10  611.28   41.48
   4   6  11   67.97   17.74
   4  -6  11   90.64   22.63
   4  -6  11   68.56   21.20
   4   6  11   50.27   11.63
   4   6  12  367.49   35.91
   4  -6  12  502.17   51.30
   4   6  12  368.51   19.96
   4  -6  12  577.71   54.63
  -4   7  13  526.38   42.81
  -4  -7  12   63.67   24.89
   4   7 -12    5.20   18.95
  -4   7  11  478.91   39.50
   4   7 -10   88.15   15.18
   4   7 -10   85.08   14.69
  -4   7  10   82.30   16.47
  -4  -7  10  115.05   29.25
   4  -7 -10   74.87   11.59
   4   7  -9  587.07   43.53
   4   7  -9  546.85   43.24
  -4   7   9  611.03   45.07
  -4  -7   9  698.21   61.78
   4  -7  -9  707.16   43.17
   4   7  -9  648.01   60.21
   4   7  -8   16.78   10.16
   4   7  -8   23.57   10.65
  -4   7   8   42.02   13.40
  -4  -7   8   21.10   15.55
   4  -7  -8   35.41   12.07
   4   7  -8   14.81    8.32
   4  -7  -8   29.76   13.83
   4   7  -7  557.80   49.59
   4   7  -7  511.52   43.13
  -4   7   7  638.68   46.00
   4  -7  -7  696.63   49.37
  -4  -7   7  616.17   57.77
   4  -7  -7  413.33   43.93
   4   7  -7  678.51   59.37
   4   7  -6  138.82   22.93
   4  -7  -6   93.89    9.71
   4   7  -6   92.53   18.79
  -4   7   6  125.79   18.95
  -4  -7   6   97.78   21.57
   4   7  -6  134.42   28.05
   4   7  -5 1492.33   76.66
   4  -7  -5 1449.47   55.89
   4   7  -5 1350.86   70.58
  -4   7   5 1494.77   69.45
  -4  -7   5 1532.04   84.18
   4   7  -5 1564.79   85.41
   4   7  -4   29.04   10.62
   4  -7  -4   19.87    7.31
  -4   7   4   26.84   11.05
   4   7  -4    8.41    9.48
   4  -7  -4   22.51   10.20
  -4  -7   4   30.05   13.37
   4   7  -4   27.08   11.16
   4   7  -3 1856.39   82.78
   4   7  -3 2026.59   85.51
  -4   7   3 1881.59   77.15
   4  -7  -3 1994.91   86.18
  -4  -7   3 1973.22   92.85
   4   7  -3 1813.14   88.70
   4   7  -2  198.79   27.21
   4  -7  -2  198.67   26.71
   4   7  -2  181.22   25.90
  -4   7   2  203.59   26.85
   4  -7  -2  201.24   27.80
   4   7  -2  185.97   27.03
   4  -7  -1 1638.74   76.07
   4   7  -1 1393.77   70.63
  -4   7   1 1738.36   74.88
  -4  -7   1 1676.76   82.43
   4  -7  -1 1569.60   79.53
   4   7  -1 1501.89   77.89
   4  -7   0 1647.96   75.00
   4   7   0 1613.05   77.79
  -4   7   0 1758.57   76.17
  -4  -7   0 1538.47   78.11
   4   7   0 1621.97   81.15
   4  -7   1 1831.74   82.16
   4   7   1 1790.17   79.33
  -4   7  -1 1541.07   74.53
  -4  -7  -1 1580.78   77.77
   4  -7   1 1736.18   84.57
   4   7   1 1752.22   81.74
   4   7   2  211.52   28.29
   4  -7   2  178.00   26.13
  -4   7  -2  162.65   25.27
   4  -7   2  209.83   30.40
  -4  -7  -2  160.37   23.76
   4   7   2  188.60   26.93
   4  -7   3 1919.22   86.04
  -4   7  -3 1932.15   79.98
   4  -7   3 2093.12   94.05
  -4  -7  -3 2150.30   89.41
   4   7   3 1994.48   84.79
   4  -7   4   22.97   12.14
   4  -7   4   27.05   11.46
  -4   7  -4   13.02   10.45
  -4  -7  -4    2.83    5.94
   4   7   4   12.85    7.19
   4  -7   5 1212.32   69.15
  -4   7  -5 1424.34   70.58
   4  -7   5 1399.74   81.89
   4   7   5 1415.81   69.92
   4  -7   6   71.19   19.36
  -4   7  -6  115.73   20.00
   4  -7   6  124.35   25.23
   4  -7   6   79.70   20.82
  -4   7  -7  626.08   44.85
   4  -7   7  646.91   56.84
   4   7   7  584.08   43.91
   4  -7   7  600.85   54.76
   4  -7   8   36.54   13.78
   4   7   8   33.86   12.06
  -4   7  -8   31.40   11.15
  -4  -7  -8   16.74   11.55
   4  -7   8   47.62   16.97
   4  -7   8   13.61   12.42
   4   7   8   27.84   11.62
  -4   7  -9  545.86   37.93
   4   7   9  515.70   43.31
   4  -7   9  677.14   60.50
   4  -7   9  615.11   59.21
   4   7   9  508.70   39.23
   4   7  10   83.87   17.93
   4  -7  10  121.14   25.50
   4  -7  10  100.12   26.30
   4   7  10   75.19   16.35
   4   7  11  355.27   35.05
   4   7  11  422.95   31.33
   4   7  12  100.44   19.81
   4  -7  12   94.67   25.51
   4   7  12   59.87    8.98
  -4   8  13   -7.90   12.20
  -4   8  12  121.94   25.36
   4   8 -11   61.17   11.72
   4   8 -11   44.69    8.00
   4   8 -10  418.76   34.97
  -4   8  10  431.58   39.84
   4   8 -10  290.28   30.66
  -4  -8  10  420.37   53.48
   4  -8 -10  433.12   29.38
   4   8 -10  466.32   53.92
   4   8  -9   41.60   13.59
  -4   8   9   28.97   11.43
   4   8  -9   35.10   14.21
   4  -8  -9   27.89   11.12
  -4  -8   9   36.95   18.46
   4   8  -9   14.43   10.70
   4   8  -8  496.02   44.84
  -4   8   8  497.57   41.90
   4   8  -8  327.41   37.83
  -4  -8   8  442.61   50.96
   4  -8  -8  492.52   43.02
   4   8  -8  479.25   53.25
   4   8  -7   19.88   10.29
   4   8  -7   -3.49    9.99
  -4   8   7    3.14    6.56
   4  -8  -7    6.24    7.78
   4  -8  -7    4.94    9.32
   4   8  -7    7.69   11.14
  -4  -8   7    4.83   10.05
   4   8  -6  719.01   56.17
  -4   8   6  764.62   51.54
  -4  -8   6  764.33   63.00
   4  -8  -6  661.39   52.36
  -4   8   5   55.07   14.38
   4   8  -5   38.42   13.29
   4  -8  -5   36.39    8.00
   4   8  -5   37.56   14.99
  -4  -8   5   57.43   19.55
   4   8  -5   40.45   13.22
   4   8  -4 2316.87   98.17
   4   8  -4 2497.92   98.89
  -4   8   4 2412.20   90.79
   4  -8  -4 2503.26   98.66
   4  -8  -4 2351.53   99.70
   4   8  -4 2352.49  105.64
   4   8  -3   89.27   20.09
   4  -8  -3   73.46   15.81
  -4   8   3   86.44   17.60
   4   8  -3   45.54   16.60
   4  -8  -3   92.09   19.99
  -4  -8   3   55.65   16.97
   4   8  -3   96.34   23.16
   4  -8  -3   76.78   18.85
   4  -8  -2 2003.86   83.22
   4   8  -2 1963.61   88.77
  -4   8   2 1895.17   82.06
  -4  -8   2 1965.80   94.84
   4  -8  -2 2096.86   93.79
   4  -8  -2 2074.74   96.27
   4   8  -2 1996.29   94.11
   4  -8  -1  572.41   52.99
   4   8  -1  582.82   49.94
   4  -8  -1  582.39   46.55
  -4   8   1  648.26   48.12
  -4  -8   1  608.22   52.62
   4  -8  -1  592.64   50.59
   4   8  -1  579.74   49.89
   4   8   0 2543.17   99.82
   4  -8   0 2799.18  104.03
  -4   8   0 2637.16   97.51
   4  -8   0 2682.62  108.61
  -4  -8   0 2530.56  104.83
   4  -8   0 2724.14  112.58
   4   8   0 2527.51  103.62
   4  -8   1  571.60   47.40
   4   8   1  645.98   50.28
  -4   8  -1  598.78   47.88
   4  -8   1  662.35   54.12
  -4  -8  -1  478.10   45.58
   4  -8   1  606.36   53.54
   4   8   1  595.26   48.79
   4  -8   2 2118.02   91.62
   4   8   2 1995.03   86.95
  -4   8  -2 2008.97   87.49
  -4  -8  -2 1463.11   79.37
   4  -8   2 1711.34   92.99
   4   8   2 1692.20   84.00
   4  -8   3  100.35   20.63
   4   8   3   93.76   19.62
  -4   8  -3   74.15   15.93
  -4  -8  -3   58.35   16.52
   4   8   3   66.76   18.66
   4  -8   4 2548.48  106.26
   4   8   4 2341.85   93.59
  -4   8  -4 2110.98   88.48
  -4  -8  -4 2186.90   91.92
   4  -8   4 2139.94  104.51
   4   8   4 2390.62   95.33
  -4   8  -5   28.55   11.53
   4   8   5   29.83   11.61
   4  -8   5   41.19   16.24
   4  -8   6  713.77   58.37
   4   8   6  674.35   52.90
  -4   8  -6  752.68   52.78
   4  -8   6  703.20   59.93
   4   8   6  640.21   50.14
   4  -8   7   12.70   13.19
  -4   8  -7    4.28    7.51
  -4  -8  -7  -10.92   11.37
   4  -8   7    0.48    7.79
   4   8   7   -2.62    8.21
  -4   8  -8  462.67   38.88
   4  -8   8  448.52   49.74
   4  -8   8  431.34   50.17
   4   8   8  420.79   38.40
   4   8   9   27.38   13.90
  -4   8  -9   54.11   13.42
   4  -8   9   68.92   22.69
   4  -8   9   52.32   19.73
   4   8   9   30.31   11.09
  -4   8 -10  327.57   28.17
   4   8  10  272.20   32.22
   4   8  10  330.07   30.89
   4  -8  10  377.81   48.99
   4   8  11   72.97   19.80
   4  -8  11  127.87   31.38
   4  -8  11   70.87   25.93
   4   8  11   89.07   15.01
  -4   9  12   64.73   20.17
  -4   9  11  242.20   32.53
   4   9 -11  216.91   21.37
   4   9 -11  205.31   22.96
   4   9 -10   24.30   13.99
  -4   9  10   26.19   12.66
   4   9 -10   14.55   11.85
  -4  -9  10   21.87   16.61
   4  -9 -10   20.92    9.45
   4   9 -10   26.44   20.38
   4   9  -9  528.29   46.95
   4   9  -9  324.87   39.89
  -4  -9   9  476.86   58.81
   4   9  -9  500.44   58.04
   4   9  -8   18.29   10.80
   4  -9  -8   53.76   16.00
  -4  -9   8   54.45   18.19
   4   9  -8   47.35   18.32
  -4   9   7  540.74   46.48
  -4  -9   7  564.13   58.16
   4  -9  -7  627.95   51.51
  -4   9   6  105.12   20.12
   4  -9  -6   51.05    8.70
   4   9  -6   79.29   24.08
   4  -9  -5  999.30   49.23
   4   9  -5 1030.87   69.11
  -4   9   5 1067.30   63.99
  -4  -9   5 1021.96   76.35
   4   9  -5 1040.46   78.23
   4  -9  -5  987.85   68.98
   4  -9  -4   11.78    7.19
  -4   9   4   38.96   13.75
   4   9  -4   40.77   15.61
   4  -9  -4   42.08   15.48
  -4  -9   4   31.63   16.03
   4  -9  -4   35.80   14.04
   4   9  -4   39.71   18.32
   4  -9  -3 1513.88   74.16
   4   9  -3 1297.90   75.50
  -4   9   3 1369.60   72.36
  -4  -9   3 1265.68   82.23
   4  -9  -3 1468.94   80.91
   4   9  -3 1261.42   82.84
   4  -9  -3 1364.89   79.47
   4  -9  -2  137.67   26.77
   4   9  -2  196.99   31.70
  -4   9   2  261.29   32.64
   4  -9  -2  267.55   35.44
  -4  -9   2  272.98   38.45
   4  -9  -2  195.62   30.78
   4   9  -2  213.43   35.09
   4  -9  -1 2226.53   95.09
   4   9  -1 2105.74   95.90
  -4   9   1 2075.06   89.58
  -4  -9   1 2078.59  101.76
   4  -9  -1 1997.40   99.61
   4   9  -1 1971.28   98.93
   4  -9   0 1003.80   64.17
   4   9   0  969.48   65.19
  -4   9   0 1034.95   63.08
  -4  -9   0 1029.26   71.55
   4  -9   0  990.80   67.86
   4  -9   0  930.56   67.70
   4   9   0  927.43   66.80
   4   9   1 1811.52   88.14
   4  -9   1 1858.16   87.30
  -4   9  -1 2011.50   89.16
   4  -9   1 1705.62   92.79
   4   9   1 1664.74   89.22
   4   9   2  227.93   31.21
   4  -9   2  274.78   35.27
  -4   9  -2  225.31   31.82
  -4  -9  -2  224.52   31.87
   4  -9   2  235.26   36.72
   4   9   2  260.21   35.07
   4   9   3 1303.33   74.69
  -4   9  -3 1451.77   76.65
  -4  -9  -3 1344.91   79.61
   4   9   3 1261.87   75.21
   4  -9   3 1239.32   79.87
   4  -9   4   43.58   15.11
   4   9   4   33.78   13.62
  -4   9  -4   44.16   15.64
  -4  -9  -4   12.04    9.63
   4   9   4   34.97   13.72
   4  -9   4   45.30   17.46
   4   9   5 1125.30   69.36
   4  -9   5 1110.18   75.46
  -4   9  -5  923.24   61.06
   4   9   5 1048.17   67.76
   4  -9   6  116.63   27.23
   4   9   6  124.30   23.53
   4  -9   6   98.68   25.10
   4   9   6   90.77   18.85
  -4   9  -7  630.07   50.02
   4   9   7  445.53   46.76
   4   9   7  527.77   47.89
   4  -9   7  524.33   57.45
  -4   9  -8   48.19   14.87
   4   9   8   67.45   17.64
   4   9   8   49.03   14.83
   4  -9   8   38.41   15.57
  -4   9  -9  445.31   39.46
   4   9   9  440.97   39.57
   4  -9   9  484.69   55.58
   4   9  10   19.15   15.96
  -4   9 -10   -3.36   10.09
   4  -9  10   26.07   17.73
   4  -9  10   26.21   19.01
   4   9  11  159.94   28.81
   4   9  11  251.93   33.45
   4   9  11  210.99   23.00
   4   9  12   14.84   14.86
  -4  10  12  276.27   34.65
  -4  10  11  138.19   28.91
   4  10 -11   90.26   17.67
   4  10 -10  157.60   29.72
  -4  10  10  263.05   35.08
  -4 -10  10  225.45   44.49
   4 -10 -10  317.44   27.74
   4  10 -10  243.13   38.18
   4  10  -9   57.52   20.68
  -4  10   9  113.86   23.40
   4  10  -9   41.42   17.98
   4 -10  -9   75.40   19.67
  -4 -10   9   61.95   23.37
   4  10  -9   66.02   31.07
   4  10  -8  534.12   52.00
  -4  10   8  557.17   48.63
   4 -10  -8  536.94   51.23
   4  10  -8  577.95   63.17
   4  10  -7   74.37   20.99
  -4  10   7  122.00   23.97
   4  10  -7   66.67   18.72
   4 -10  -7   98.14   22.05
  -4 -10   7  104.11   30.84
   4  10  -7  107.19   29.07
   4  10  -6  903.77   70.43
   4  10  -6  777.49   62.61
  -4  10   6 1012.34   65.29
  -4 -10   6  963.23   79.16
   4  10  -6  976.57   79.55
   4  10  -5   34.71   16.75
   4  10  -5   42.09   15.09
   4 -10  -5   71.52   14.91
   4  10  -5   68.05   23.49
  -4 -10   5   84.65   23.56
   4  10  -4  701.67   60.42
   4 -10  -4  668.55   46.80
   4 -10  -4  766.37   60.49
  -4 -10   4  654.63   64.50
   4  10  -4  662.41   63.90
   4 -10  -4  588.21   54.66
   4  10  -3   48.70   18.26
   4 -10  -3    6.71    7.41
   4 -10  -3   26.97   13.43
   4  10  -3   37.68   19.34
   4 -10  -3   20.62   11.84
  -4 -10   3   35.39   15.29
   4  10  -2 2200.19  101.47
   4 -10  -2 2389.02  109.93
  -4 -10   2 2207.60  112.65
   4  10  -2 2111.42  108.61
   4 -10  -1  146.46   26.74
   4  10  -1  210.85   31.33
  -4 -10   1  208.25   35.54
   4  10  -1  204.16   34.17
   4 -10  -1  234.19   35.18
   4  10   0 1442.52   81.43
  -4  10   0 1455.71   79.23
  -4 -10   0 1500.63   90.00
   4  10   0 1434.71   86.81
   4 -10   0 1528.96   89.52
   4 -10   1  248.85   36.45
  -4  10  -1  250.96   32.46
  -4 -10  -1  242.35   36.41
   4  10   1  237.87   35.99
   4 -10   1  249.82   37.99
  -4  10  -2 2266.86   98.89
   4 -10   2 2227.19  105.00
   4 -10   2 2078.23  106.90
   4 -10   3   41.05   15.87
  -4  10  -3   31.92   12.90
  -4 -10  -3   28.52   14.44
   4 -10   3   30.72   14.83
   4  10   3   16.70   14.74
   4 -10   4  633.12   59.19
  -4  10  -4  734.02   60.41
   4  10   4  665.23   57.24
   4 -10   4  674.55   61.81
  -4  10  -5   51.17   16.69
   4 -10   5   58.41   25.90
   4  10   5   59.10   19.09
  -4  10  -6 1050.16   67.80
   4  10   6  946.97   66.82
   4 -10   6  883.78   72.97
  -4  10  -7  144.83   25.81
   4  10   7  128.07   23.32
   4  10   7  103.96   23.41
  -4  10  -8  493.77   44.30
   4  10   8  544.61   50.38
   4  10   8  523.00   47.84
   4 -10   8  550.65   61.59
   4  10   9   79.46   19.37
   4 -10   9   63.81   23.61
   4  10  10  249.46   35.29
  -4  10 -10  292.88   32.55
   4 -10  10  212.09   40.92
   4 -10  10  235.31   42.76
   4  10  10  208.66   29.26
  -4  10 -11  118.28   17.78
   4  10  11  106.16   25.91
   4  10  12  224.60   33.95
  -4  11  11  639.02   56.81
   4  11 -10  136.73   26.17
  -4  11  10   80.87   21.86
   4  11  -9  365.37   47.65
  -4  11   9  343.76   40.82
   4 -11  -9  399.06   39.71
  -4 -11   9  295.78   52.37
   4  11  -9  373.29   54.71
   4  11  -8  254.40   39.52
  -4  11   8  207.85   31.78
   4 -11  -8  255.43   35.13
  -4 -11   8  198.87   44.36
   4  11  -8  225.03   44.89
   4  11  -7  850.77   67.95
  -4  11   7  960.75   66.34
  -4 -11   7  897.38   81.97
   4 -11  -7  892.57   66.55
   4  11  -7  874.27   79.32
  -4  11   6   26.24   11.16
   4  11  -6   16.32   14.23
  -4 -11   6   32.68   16.66
   4  11  -6    4.56   14.84
   4  11  -5  515.33   56.00
   4 -11  -5  388.08   33.80
  -4  11   5  522.02   50.15
   4 -11  -5  576.24   56.61
  -4 -11   5  540.13   62.36
   4  11  -5  487.09   57.69
   4  11  -4   33.65   13.97
   4 -11  -4   47.21   15.35
  -4  11   4   40.56   15.99
   4 -11  -4   64.09   21.96
   4  11  -4   20.51   17.43
  -4 -11   4   51.48   23.48
   4  11  -3 1091.80   77.18
  -4  11   3 1143.96   72.26
   4 -11  -3 1298.43   83.79
  -4 -11   3 1155.09   87.20
   4  11  -3 1080.90   81.46
   4  11  -2  379.65   45.41
   4 -11  -2  261.95   36.24
  -4  11   2  411.78   44.42
   4 -11  -2  443.69   51.29
  -4 -11   2  427.11   52.80
   4 -11  -2  393.95   44.30
   4  11  -2  439.63   55.19
   4 -11  -1  312.49   38.27
   4  11  -1  525.45   51.99
  -4  11   1  565.04   51.43
   4 -11  -1  540.65   56.61
  -4 -11   1  524.92   57.82
   4  11  -1  507.23   57.35
   4 -11  -1  451.82   52.98
  -4  11   0    2.70   10.39
   4 -11   0    0.48    8.87
   4  11   0    4.83    8.07
   4  11   1  527.51   53.29
  -4  11  -1  520.20   50.40
  -4 -11  -1  539.54   56.83
   4  11   1  507.58   55.25
   4 -11   1  390.37   49.84
   4 -11   2  190.14   31.61
   4  11   2  390.50   47.46
  -4  11  -2  448.98   47.48
  -4 -11  -2  194.74   34.75
   4  11   2  376.78   47.29
   4 -11   2  415.40   51.65
  -4  11  -3  997.82   68.89
   4  11   3  957.88   70.14
   4  11   3 1051.45   75.90
   4 -11   3  978.68   78.50
  -4  11  -4   62.53   16.75
   4  11   4   55.64   17.50
   4  11   4   50.29   17.55
   4 -11   4   57.27   22.55
  -4  11  -5  488.76   49.83
   4  11   5  520.30   51.94
   4 -11   5  523.89   57.47
   4  11   5  475.87   50.41
  -4  11  -6   28.66   10.45
   4  11   6   37.78   17.69
   4  11   6   36.82   13.28
   4 -11   6   13.84   11.71
  -4  11  -7  810.37   62.48
   4  11   7  744.24   65.73
   4  11   7  743.14   60.95
   4 -11   7  700.49   69.08
  -4  11  -8  225.65   32.44
   4  11   8  242.33   38.59
   4 -11   8  270.57   47.96
  -4  11  -9  325.96   37.69
   4  11   9  307.29   40.99
   4  11   9  196.27   30.56
   4 -11   9  229.15   44.42
  -4  11 -10   86.38   20.15
   4  11  10  124.26   27.80
   4  11  11  412.96   54.26
  -4  12  11   11.15   21.39
   4  12 -10  688.16   65.01
  -4  12   9  276.29   38.05
   4  12  -9  185.50   32.59
   4  12  -9  281.11   50.48
   4  12  -8   73.75   25.97
  -4  12   8  185.10   30.81
   4 -12  -8  114.86   28.06
  -4 -12   8  142.79   42.26
   4  12  -8  136.30   35.76
   4  12  -7  103.68   29.45
  -4  12   7   86.04   24.60
   4 -12  -7   91.42   22.26
  -4 -12   7  113.20   39.31
   4  12  -7   94.29   29.84
   4  12  -6  550.81   59.38
  -4  12   6  717.16   59.96
  -4 -12   6  632.34   71.20
   4  12  -6  644.66   71.03
   4  12  -5    6.58    9.14
  -4  12   5    3.39    9.47
   4 -12  -5    8.24   12.97
  -4 -12   5    7.26   14.00
   4  12  -5    8.71   12.12
   4  12  -4  913.89   73.94
   4 -12  -4  858.39   65.05
  -4  12   4 1112.82   74.66
   4 -12  -4 1137.47   80.60
  -4 -12   4 1022.59   88.25
   4  12  -4 1003.56   85.19
   4  12  -3   81.17   23.11
   4 -12  -3   46.89   17.52
  -4  12   3  126.38   26.62
   4 -12  -3  114.50   28.47
   4  12  -3   84.59   22.97
   4  12  -2  418.20   53.23
  -4  12   2  571.92   55.22
  -4 -12   2  524.90   63.00
  -4  12   1   59.37   15.48
   4  12  -1   44.63   16.38
   4 -12  -1   19.92   13.06
   4  12  -1   60.09   24.34
  -4 -12   1   87.94   30.40
   4 -12   0  601.39   59.16
   4  12   0  564.50   56.01
  -4  12   0  533.95   51.86
  -4 -12   0  549.01   62.37
   4 -12   0  609.41   62.21
   4  12   0  589.51   61.38
  -4  12  -1   57.86   20.84
   4  12   1   48.63   18.90
   4  12   1   28.30   18.59
   4 -12   1   73.81   20.52
  -4  12  -2  577.07   56.08
   4  12   2  482.78   51.32
   4  12   2  508.92   57.33
  -4  12  -3   84.53   22.41
   4  12   3   48.57   21.41
   4  12   3   80.77   26.26
  -4  12  -4 1126.11   78.49
   4  12   4 1054.19   76.67
   4  12   4 1026.37   78.79
   4 -12   4 1067.95   89.02
  -4  12  -5    0.82   10.66
   4  12   5    8.10    9.25
   4 -12   5    2.08   14.44
   4  12   5    2.80   10.02
  -4  12  -6  608.10   57.34
   4  12   6  540.82   58.32
   4  12   6  584.68   60.20
   4 -12   6  584.80   65.72
  -4  12  -7   96.11   22.59
   4  12   7   79.32   21.56
   4  12   7   66.30   21.01
   4 -12   7   69.29   23.17
  -4  12  -8  121.70   27.48
   4  12   8  108.47   26.01
   4  12   8  128.36   28.26
   4 -12   8  112.57   36.05
  -4  12  -9  174.07   29.08
   4  12   9  187.45   32.92
  -4  12 -10  648.39   54.00
   4  12  10  750.00   68.60
  -4  13   9  930.86   72.94
   4  13  -8  222.45   48.85
  -4  13   7  234.60   37.32
   4  13  -7  303.44   51.08
  -4  13   6   91.40   24.43
   4  13  -6   59.87   26.27
   4  13  -5  412.22   62.83
  -4  13   5  474.82   52.37
   4 -13  -5  618.82   65.43
  -4 -13   5  598.35   72.66
   4 -13  -4    2.00   13.11
   4  13  -4   27.06   18.10
  -4  13   4   22.97   16.14
   4 -13  -4   22.18   15.79
   4  13  -4   24.86   17.52
  -4 -13   4   13.84   19.71
   4 -13  -3  610.36   53.90
  -4  13   3  688.14   61.49
   4 -13  -3  617.28   63.06
  -4 -13   3  536.85   67.19
   4  13  -3  585.13   67.96
   4  13  -2   26.04   16.30
   4 -13  -2   27.98   16.16
  -4  13   2   57.40   21.66
   4 -13  -2   58.67   22.74
   4  13  -2   45.56   18.13
  -4  13   1  264.17   38.13
   4  13  -1  179.77   36.94
   4  13  -1  207.00   38.79
  -4  13   0   -3.55   11.88
   4  13   0   27.92   17.68
   4  13   0   16.13   14.25
  -4  13  -1  199.37   33.66
   4  13   1  227.11   38.45
   4  13   1  178.64   38.55
  -4  13  -2   36.43   19.66
   4  13   2   25.33   15.57
   4  13   2   13.35   15.62
  -4  13  -3  612.42   61.29
   4  13   3  499.62   56.37
   4  13   3  621.50   64.82
   4 -13   3  569.92   63.47
  -4  13  -4   33.96   14.31
   4  13   4   25.48   17.12
   4 -13   4   13.89   15.35
   4  13   4   20.90   17.59
  -4  13  -5  674.19   64.30
   4  13   5  598.33   62.41
   4 -13   5  551.88   65.05
  -4  13  -6   65.96   19.86
   4  13   6   63.78   23.70
   4  13   6   54.48   20.40
   4  13   7  252.04   41.03
   4  13   9  774.35   74.90
  -4  13 -10   79.30   25.41
   4  13  10   23.50   19.25
  -4  14   7  131.11   32.06
   4  14  -7   64.21   23.45
   4  14  -7  111.06   35.51
  -4  14   6  335.95   46.56
   4  14  -6  209.64   44.33
   4  14  -6  230.14   51.09
   4 -14  -5   30.16   13.72
   4  14  -5   46.69   21.90
  -4  14   5   77.02   23.98
   4  14  -5   39.43   21.55
   4 -14  -4  442.35   44.38
   4  14  -4  258.35   46.17
   4 -14  -4  441.11   60.81
   4  14  -4  397.40   61.49
   4 -14  -3   56.08   19.88
   4  14  -3   91.35   29.19
   4  14  -3   79.89   26.41
   4 -14  -2  790.44   76.96
   4  14  -2  645.30   73.55
   4  14  -1  128.16   33.27
   4  14   0  360.76   54.99
   4  14   1  100.18   34.40
   4  14   2  769.78   76.00
  -4  14  -3   53.74   23.30
  -4  14  -4  430.13   55.22
   4  14   4  248.01   43.01
  -4  14  -5   17.27   15.60
   4  14   5   53.43   23.23
  -4  14  -6  212.88   36.93
   4  14   6  173.57   35.32
  -4  14  -7  117.34   28.83
   4  14   7  100.11   28.88
  -4  14  -8  580.67   59.28
   4  14   8  504.32   64.62
   4  15  -6   27.10   28.52
   4  15  -5  308.96   57.49
   4 -15  -4    2.14   18.83
   4  15  -4   33.01   19.71
   4 -15  -3  242.53   44.80
   4  15  -3  233.48   46.59
  -4  15   2   57.95   22.43
   4 -15  -2   59.33   27.99
   4  15  -2   65.57   28.14
  -4  15   1  470.53   56.86
   4  15  -1  503.20   66.93
   4  15  -1  493.77   69.39
  -4  15   0  304.95   49.57
   4  15   0  289.22   48.93
  -4  15  -1  435.21   56.02
   4  15   1  445.54   62.41
   4  15   1  547.96   68.42
   4  15   2   23.84   17.90
   4  15   2   22.01   18.11
   4  15   3   92.43   35.61
   4  16  -3    8.81   22.86
   4  16  -2  203.67   47.58
   4  16  -1  159.46   40.31
  -5   0  13  334.56   37.41
   5   0 -12   -4.28   11.11
  -5   0  11  704.51   51.76
   5   0 -11  939.61   57.09
  -5   0  10   -2.87    7.67
   5   0 -10   -1.79    9.55
  -5   0   9  330.49   34.14
  -5   0   9  358.54   38.91
   5   0  -9  319.11   35.67
   5   0  -8   -2.97    4.41
   5   0  -8    2.78    3.22
  -5   0   8   -2.74    6.19
  -5   0   8   -4.66    6.56
  -5   0   7   84.66   18.55
   5   0  -7   49.21   12.27
   5   0  -6   -2.06    4.67
   5   0  -6    5.77    5.32
  -5   0   6    2.17    4.08
  -5   0   6    5.56    9.07
   5   0  -6   13.23    9.54
  -5   0   5 7264.55  149.36
   5   0  -5 7377.24  160.51
  -5   0   5 7397.97  162.81
   5   0  -4    0.94    3.96
  -5   0   4   -1.29    4.14
   5   0  -4    3.07    4.94
  -5   0   4   -2.70    4.78
  -5   0   3 1312.57   62.61
   5   0  -3 1407.39   65.17
  -5   0   3 1414.90   70.36
   5   0  -3 1395.69   69.57
  -5   0   2   -0.40    3.95
   5   0  -2   -3.22    5.66
  -5   0   2   -8.53    8.56
   5   0  -2    1.43    4.56
   5   0  -1 3388.85  100.25
  -5   0   1 3248.65   96.27
  -5   0   1 3211.66  106.51
  -5   0   0   12.81    8.57
   5   0   0    3.32    6.12
  -5   0   0    1.69    8.00
   5   0   0    3.83    6.47
   5   0   1 3198.30   98.45
  -5   0  -1 3131.65   94.95
   5   0   1 2994.20   99.33
  -5   0  -1 3213.60  106.38
  -5   0  -2    3.93    6.04
   5   0   2    5.99    7.13
   5   0   2    0.41    4.46
  -5   0  -2   -1.27    5.33
  -5   0  -3 1224.88   58.37
   5   0   3 1344.01   67.07
  -5   0  -3 1388.10   72.16
   5   0   4   -0.50    4.09
   5   0   4    5.20    7.30
  -5   0  -4    6.35    7.09
   5   0   5 6594.19  145.14
   5   0   5 6746.13  151.60
   5   0   6   -3.91    6.46
   5   0   6   -2.68    4.75
   5   0   7   42.05   12.38
   5   0   8   -4.58    6.44
   5   0   8   -2.12    5.63
   5   0   9  363.90   39.91
   5   0   9  395.08   36.97
   5   0  10    4.04    9.21
   5   0  10    0.52    5.37
   5   0  11  697.40   49.12
   5   0  12    4.81   11.94
   5   0  12    7.45    9.88
   5   0  13  281.78   30.83
   5   0  13  275.03   30.12
   5   0  14    1.16    9.81
  -5  -1  13   52.70   16.82
  -5  -1  12  544.13   49.00
   5  -1 -12  542.37   37.93
   5   1 -12  565.38   43.66
  -5  -1  11   46.49   14.55
  -5   1  11   30.94   12.62
   5   1 -11   43.28   15.66
  -5   1  10  387.04   38.58
  -5   1  10  367.00   39.10
  -5  -1  10  390.42   40.82
   5  -1 -10  396.52   37.67
   5   1 -10  402.51   40.44
  -5   1   9   66.30   15.09
  -5  -1   9   56.85   18.10
  -5   1   9   74.05   19.34
   5   1  -9   83.49   18.54
   5  -1  -9   70.93   16.56
   5   1  -8  338.78   23.68
  -5  -1   8  405.47   40.20
  -5   1   8  394.80   38.42
  -5   1   8  398.40   36.15
   5  -1  -7   52.60    9.98
   5   1  -7   40.16   10.56
  -5   1   7   68.42   16.82
  -5  -1   7   75.56   17.55
   5   1  -7   43.46   10.82
  -5   1   7   51.42   14.22
   5  -1  -7   50.15   10.48
  -5  -1   7   63.04   15.54
   5  -1  -6  961.99   47.98
   5  -1  -6  944.53   46.73
   5   1  -6 1004.58   51.67
   5   1  -6 1128.34   63.14
   5  -1  -6 1132.07   63.41
  -5   1   6 1185.20   66.31
  -5  -1   6 1164.24   67.45
  -5   1   6 1002.50   56.19
  -5  -1   6 1103.60   60.40
   5   1  -5  819.93   49.46
  -5   1   5  777.02   50.24
  -5  -1   5  881.40   53.07
   5  -1  -5  918.45   56.27
   5   1  -5  851.45   54.82
  -5   1   5  965.22   59.93
  -5  -1   5  881.43   57.42
   5   1  -4 3147.98   96.88
  -5   1   4 2979.07   92.93
  -5  -1   4 3260.33   99.41
  -5   1   4 3389.77  110.70
   5   1  -4 3151.20  106.14
  -5  -1   4 3248.74  108.94
   5  -1  -4 3129.84  104.25
  -5   1   3  466.77   37.32
   5   1  -3  498.18   38.73
  -5  -1   3  490.63   38.61
   5  -1  -3  483.52   38.48
   5   1  -3  497.41   41.88
  -5  -1   3  531.16   43.88
   5  -1  -3  477.34   41.30
  -5   1   3  518.37   43.37
  -5   1   2 1860.41   73.11
  -5  -1   2 1815.05   74.18
   5   1  -2 2045.15   78.36
   5  -1  -2 1757.76   76.95
   5   1  -2 1922.08   81.26
   5  -1  -2 1785.52   77.68
  -5   1   2 1991.87   83.95
  -5  -1   2 1982.71   82.77
  -5   1   1   93.69   18.51
  -5  -1   1  105.59   18.87
   5   1  -1  122.03   19.15
   5  -1  -1  121.64   19.49
   5  -1  -1   90.32   17.50
  -5   1   1  130.91   21.42
  -5  -1   1  118.38   21.19
  -5   1   0  890.01   50.49
   5   1   0  916.13   52.53
  -5  -1   0  887.49   52.07
   5  -1   0  957.10   54.39
   5  -1   0  811.65   54.27
  -5   1   0 1005.63   60.77
  -5  -1   0  998.74   58.83
   5   1   0  980.63   57.20
   5   1   1   83.67   17.99
  -5   1  -1  125.19   18.83
  -5  -1  -1  111.52   18.66
   5  -1   1   92.44   18.16
   5  -1   1  103.08   19.74
  -5   1  -1  115.07   21.72
   5   1   1  111.71   19.66
   5   1   2 1909.22   75.83
  -5   1  -2 1866.99   71.82
   5  -1   2 1977.53   78.55
   5  -1   2 1778.24   78.68
  -5  -1  -2 1660.75   75.75
  -5   1  -2 1740.85   79.28
   5   1   2 1882.07   77.74
   5   1   3  403.29   37.66
  -5   1  -3  494.70   36.94
   5  -1   3  511.53   40.79
   5  -1   3  487.89   40.83
   5   1   3  497.85   40.21
  -5  -1  -3  444.01   39.68
   5   1   4 3060.60   93.80
  -5   1  -4 3278.66   95.66
   5  -1   4 2912.61   99.68
   5  -1   4 3111.07  104.24
  -5  -1  -4 3159.59  107.87
   5   1   4 3286.75  102.89
   5   1   5  794.97   48.93
  -5   1  -5  722.55   44.08
   5  -1   5  862.73   54.04
   5  -1   5  841.60   53.73
   5   1   5  892.38   53.55
   5   1   6  969.58   54.39
   5  -1   6 1020.90   58.41
   5  -1   6 1002.61   60.53
   5   1   6 1037.81   58.55
   5  -1   7   53.94   13.65
   5   1   7   72.16   15.20
   5   1   8  362.63   34.11
   5  -1   8  386.19   39.13
   5  -1   8  369.77   38.02
   5   1   8  317.31   33.36
   5  -1   9   40.31   12.82
   5   1   9   22.53   12.65
   5  -1   9   65.70   17.97
   5   1   9   40.22   12.97
   5   1  10  325.05   37.23
   5  -1  10  325.20   34.50
   5   1  10  385.52   36.75
   5  -1  11   38.53   15.07
   5  -1  11   41.90   12.23
   5   1  11   46.82   13.27
   5   1  12  373.48   41.02
   5  -1  12  390.06   39.49
   5  -1  13   52.16   15.66
   5   1  13   38.69   11.88
   5   1  13   20.38    8.83
   5   1  14  135.82   16.22
  -5  -2  13  214.40   35.46
  -5   2  12   49.18   13.92
  -5  -2  12   60.25   19.66
   5  -2 -12   34.27    9.07
  -5  -2  11  522.24   48.33
   5   2 -11  537.20   48.82
   5  -2 -11  453.13   38.11
  -5   2  10   55.02   14.70
  -5  -2  10   75.91   19.77
  -5   2  10   60.02   16.47
   5  -2 -10   63.72   16.21
   5   2 -10   73.46   18.10
  -5   2   9  808.49   51.77
   5  -2  -9  907.53   56.25
  -5   2   9  784.90   54.36
  -5  -2   9  825.17   61.19
   5   2  -8   59.82   10.46
  -5   2   8  124.61   20.58
  -5   2   8  129.11   22.83
   5  -2  -8  126.99   22.10
   5  -2  -7  878.89   37.74
   5  -2  -7  930.99   38.26
   5   2  -7 1157.55   54.97
  -5   2   7 1118.29   58.71
   5   2  -7 1074.26   53.99
  -5   2   7 1233.19   68.40
  -5  -2   7 1319.78   73.79
   5   2  -7 1255.91   70.19
   5  -2  -6 1070.62   49.68
   5   2  -6 1154.46   58.76
  -5   2   6 1303.10   69.57
   5   2  -6 1249.12   69.02
  -5  -2   6 1287.90   71.63
  -5   2   6 1242.06   60.83
   5   2  -5  484.55   39.49
   5   2  -5  481.08   38.85
  -5   2   5  549.70   41.39
  -5  -2   5  660.02   50.55
  -5   2   5  630.89   47.99
   5   2  -5  508.28   44.79
   5  -2  -5  609.46   46.03
   5   2  -4   27.65    9.46
   5   2  -4   14.26    8.28
  -5   2   4   33.38   10.30
   5  -2  -4   31.00   10.01
  -5  -2   4   28.60   11.93
  -5   2   4   36.93   12.50
   5   2  -4   30.46   12.24
   5   2  -3 5379.85  126.72
   5  -2  -3 4736.71  118.25
  -5   2   3 5042.19  121.90
   5  -2  -3 5132.22  131.74
  -5   2   3 5507.25  142.17
  -5  -2   3 5582.96  144.41
   5   2  -3 5282.75  137.69
   5   2  -2  803.51   50.48
   5  -2  -2 1000.49   55.63
  -5   2   2  927.95   52.27
  -5   2   2 1044.24   61.10
   5  -2  -2 1018.91   58.96
   5   2  -2 1013.29   59.78
  -5  -2   2 1005.81   60.62
   5   2  -1 1047.49   60.12
   5  -2  -1 1150.84   59.76
  -5   2   1 1142.39   57.66
   5  -2  -1 1216.20   65.94
   5   2  -1 1087.30   61.65
  -5   2   1 1016.36   64.25
  -5  -2   1 1169.86   65.26
   5  -2   0   69.75   15.60
  -5   2   0   55.38   13.43
   5   2   0   52.41   16.09
  -5  -2   0   41.76   13.23
  -5   2   0   37.07   11.17
   5   2   0   73.72   16.17
   5  -2   0   53.09   13.59
   5   2   1 1232.49   60.90
   5  -2   1 1145.23   60.98
  -5   2  -1 1133.68   58.63
   5   2   1 1281.19   65.68
  -5  -2  -1 1214.01   66.30
   5  -2   1 1139.86   63.09
   5   2   2  945.85   54.16
   5  -2   2 1082.15   59.44
  -5   2  -2  882.72   50.71
  -5  -2  -2  804.19   55.12
   5  -2   2  972.56   57.68
   5   2   2  803.90   53.38
  -5   2  -3 5105.85  119.88
   5   2   3 5287.20  125.67
   5   2   3 5061.89  130.89
   5  -2   3 5436.91  136.97
  -5   2  -4   28.26   10.49
   5  -2   4   10.42    7.25
   5   2   4   37.30   11.68
  -5  -2  -4   30.73   12.40
   5  -2   4   26.05   11.00
   5   2   4   27.57   10.22
   5   2   5  563.93   42.24
  -5   2  -5  505.17   37.40
   5  -2   5  629.06   47.26
   5   2   5  592.47   45.41
   5  -2   5  510.40   44.43
  -5   2  -6 1094.11   52.85
   5   2   6 1068.28   58.05
   5  -2   6 1083.20   62.25
   5   2   6 1280.48   65.74
   5  -2   6 1284.49   69.16
   5   2   7 1123.79   59.35
   5  -2   7 1095.06   65.03
   5  -2   8   61.00   13.38
   5   2   8   47.82   14.23
   5   2   8   77.23   17.75
   5  -2   8  103.76   20.52
   5   2   9  578.55   42.62
   5  -2   9  606.34   52.74
   5   2   9  788.58   50.85
   5  -2   9  731.36   53.51
   5   2  10   53.76   14.92
   5  -2  10   60.23   17.96
   5  -2  10   87.96   19.47
   5   2  10   65.27   14.12
   5  -2  11  494.24   47.98
   5  -2  11  502.89   44.58
   5   2  11  495.04   40.57
   5  -2  11  547.73   50.26
   5   2  12   45.19   17.02
   5  -2  12   68.74   16.49
   5  -2  12   49.76   17.94
   5   2  13  232.98   25.43
   5   2  13  247.40   25.82
   5   2  14   21.55    7.15
  -5   3  13  180.31   27.10
  -5   3  12  261.88   33.72
  -5  -3  12  298.42   40.16
   5  -3 -12  185.88   15.70
   5   3 -12  236.20   36.20
  -5  -3  11   11.38    9.61
   5   3 -11   20.82   12.50
   5  -3 -11    2.54   10.02
  -5   3  10  723.41   51.22
  -5  -3  10  775.22   60.70
   5   3 -10  934.80   66.28
   5  -3 -10  811.48   51.01
  -5   3   9   15.21    7.36
   5   3  -9   25.02    6.04
   5   3  -9   14.25    6.43
   5  -3  -9   30.21   11.14
   5   3  -8 1659.96   65.87
   5   3  -8 1538.22   63.66
  -5   3   8 1599.73   72.64
  -5  -3   8 1914.42   93.30
   5  -3  -8 2055.37   85.75
   5   3  -8 1936.66   91.40
   5  -3  -7   35.41    7.93
   5  -3  -7   58.46    9.19
   5   3  -7  102.61   17.70
  -5   3   7   85.68   16.45
   5   3  -7   22.69    9.98
  -5  -3   7  115.52   23.17
   5   3  -7   96.76   21.23
   5  -3  -6  908.07   44.38
   5  -3  -6  862.50   44.26
   5   3  -6  997.72   55.70
   5   3  -6 1022.47   56.21
  -5   3   6 1030.34   56.53
  -5  -3   6 1118.35   69.64
   5   3  -6 1129.10   68.44
   5   3  -5  655.39   46.02
  -5  -3   5  714.08   55.66
  -5   3   5  752.91   52.53
   5  -3  -5  672.90   48.20
   5   3  -5  647.56   51.00
   5   3  -5  655.73   45.93
  -5   3   5  667.29   45.96
   5   3  -4  312.20   33.82
   5   3  -4  359.20   34.40
  -5   3   4  481.76   38.12
  -5  -3   4  507.24   46.09
   5  -3  -4  381.35   36.50
  -5   3   4  485.43   42.23
   5   3  -4  356.93   37.87
   5   3  -3  147.80   23.19
  -5   3   3  114.55   19.21
   5   3  -3  133.96   22.12
   5  -3  -3   74.11   16.41
  -5  -3   3  124.72   23.37
   5  -3  -3  127.34   23.13
  -5   3   3  135.55   22.07
   5   3  -3  112.79   19.75
  -5   3   2 1413.29   65.13
   5  -3  -2 1362.30   64.68
   5  -3  -2 1536.90   74.69
  -5  -3   2 1445.90   76.18
  -5   3   1  356.25   32.76
   5  -3  -1  360.77   33.52
   5   3  -1  264.17   32.72
  -5  -3   1  293.63   35.56
   5  -3  -1  296.14   33.57
   5   3  -1  327.45   34.60
  -5   3   0 1972.34   76.59
   5  -3   0 1832.57   76.93
   5   3   0 1946.64   77.54
   5   3   0 1916.41   81.42
   5  -3   0 1985.95   83.38
  -5   3  -1  378.49   33.86
   5  -3   1  382.55   37.30
   5   3   1  393.76   35.81
   5   3   1  367.63   35.99
   5  -3   1  378.61   37.07
  -5  -3  -1  408.75   38.63
   5  -3   2 1460.76   70.21
  -5   3  -2 1414.04   64.86
   5   3   2 1447.63   67.83
   5   3   2 1468.23   70.42
   5  -3   2 1429.42   71.06
  -5  -3  -2 1532.18   74.87
   5  -3   3  111.86   20.53
   5   3   3   89.01   19.12
  -5   3  -3  114.66   18.37
   5   3   3  116.23   20.13
  -5  -3  -3   78.42   19.03
   5  -3   3  131.24   21.80
   5  -3   4  505.75   41.62
   5   3   4  438.52   37.24
  -5   3  -4  358.42   32.37
   5  -3   4  454.48   41.45
   5   3   4  450.06   41.41
  -5  -3  -4  380.02   40.40
  -5   3  -5  561.02   40.24
   5  -3   5  748.45   52.66
   5   3   5  636.56   44.50
   5   3   5  658.65   49.28
  -5  -3  -5  481.10   41.45
   5  -3   5  721.91   52.64
  -5   3  -6  993.67   52.35
   5  -3   6  971.24   60.59
   5   3   6  812.41   52.82
   5   3   6 1032.05   59.50
  -5  -3  -6  972.59   60.00
   5  -3   6 1068.96   65.00
  -5   3  -7   78.09   14.72
   5   3   7   52.30   13.73
   5  -3   7   62.47   14.46
   5   3   7   83.42   18.10
   5   3   8 1608.10   74.29
   5  -3   8 1493.14   77.85
   5   3   8 1698.59   75.26
   5  -3   8 1811.33   85.50
   5   3   9   27.51   13.25
   5  -3   9   19.07   11.87
   5   3   9   26.88   10.60
   5  -3  10  511.31   48.61
   5  -3  10  708.87   57.23
   5   3  10  557.29   44.15
   5   3  10  592.73   43.12
   5  -3  10  687.88   54.22
   5  -3  11   21.62   13.47
   5  -3  11   -5.56   13.49
   5   3  11   15.91    7.65
   5   3  12  230.83   33.45
   5  -3  12  228.19   31.03
   5  -3  12  288.41   38.05
   5   3  13  107.15   15.43
   5   3  13  131.79   15.91
  -5   4  13  335.69   39.99
  -5   4  12   37.20   14.59
  -5  -4  12   63.45   19.30
   5   4 -12   31.64   15.55
  -5  -4  11  593.52   55.51
   5   4 -11  637.49   57.30
   5  -4 -11  605.67   37.57
  -5   4  10   17.90    7.66
  -5  -4  10   24.19   11.75
   5  -4 -10    3.04    9.71
   5   4  -9  957.36   45.21
  -5   4   9 1089.33   61.24
  -5  -4   9 1155.14   77.62
   5  -4  -9 1010.51   60.92
   5   4  -8   28.18   11.08
  -5   4   8   21.88   11.81
  -5  -4   8   28.74   15.79
   5  -4  -8   14.92    9.31
   5   4  -8   20.70    9.09
   5   4  -7 1467.05   68.07
   5   4  -7 1402.98   68.16
  -5   4   7 1501.14   69.98
  -5  -4   7 1676.97   88.08
   5   4  -7 1565.25   86.09
   5   4  -6   16.53    9.48
   5  -4  -6   15.21    7.86
   5   4  -6   16.62   10.36
  -5   4   6   24.62   10.49
  -5  -4   6   29.63   15.27
   5   4  -6   29.58   12.98
   5  -4  -5 1220.92   56.98
   5   4  -5 1125.99   62.68
  -5   4   5 1204.48   60.30
   5   4  -5 1294.64   67.56
  -5  -4   5 1292.13   73.74
   5  -4  -5 1279.53   67.51
   5   4  -5 1258.39   72.77
   5   4  -4   64.97   15.85
  -5   4   4   72.08   14.80
   5   4  -4   62.21   16.61
   5  -4  -4   79.08   16.73
  -5  -4   4   90.92   20.74
   5   4  -4   81.18   19.61
   5  -4  -3  510.20   40.16
   5   4  -3  552.35   44.96
   5  -4  -3  620.25   48.89
  -5  -4   3  831.89   56.96
  -5   4   3  715.69   46.08
   5   4  -3  447.62   40.31
   5   4  -2  138.40   23.89
  -5  -4   2  129.78   23.94
   5   4  -2  143.67   24.22
   5  -4  -2  113.06   22.05
  -5   4   2  104.62   18.60
   5  -4  -2  120.32   20.02
   5   4  -2  121.52   21.35
  -5   4   1 3372.35  101.20
   5   4  -1 3349.63  104.85
   5  -4  -1 3587.26  114.67
   5   4  -1 3419.28  113.73
  -5   4   0   53.05   14.93
   5   4   0   51.96   13.63
   5  -4   0   56.87   15.16
  -5  -4   0   48.55   14.85
   5  -4   0   49.03   16.23
   5   4   0   71.35   16.98
   5   4   1 3699.05  110.03
  -5   4  -1 3689.53  105.54
   5  -4   1 3382.27  107.80
   5   4   1 3381.69  112.18
   5  -4   1 3488.55  115.23
   5   4   2   87.44   20.20
  -5   4  -2   90.10   19.46
   5  -4   2  117.38   22.96
   5  -4   2   92.99   20.97
  -5  -4  -2   58.71   16.66
   5   4   2   86.20   18.76
   5   4   3  764.71   49.82
   5  -4   3  764.09   53.30
   5  -4   3  701.06   52.79
   5   4   3  689.11   49.81
  -5   4  -4   54.78   15.47
   5   4   4   64.37   16.37
   5  -4   4   94.88   19.36
   5  -4   4  102.19   20.93
  -5  -4  -4   60.40   17.60
   5   4   4   67.29   17.50
   5   4   5 1002.64   56.67
   5  -4   5 1354.56   70.97
  -5   4  -5 1086.62   59.43
  -5  -4  -5 1038.29   65.65
   5  -4   5 1318.01   73.83
   5   4   5 1111.33   62.63
   5   4   6   26.36   12.22
   5  -4   6   24.96   13.23
  -5   4  -6   17.86    8.00
   5  -4   6   27.81   11.66
   5   4   6   18.02    9.04
  -5   4  -7 1332.51   61.30
   5  -4   7 1556.51   80.77
   5   4   7 1307.70   67.99
   5   4   7 1354.23   68.36
   5  -4   7 1531.57   81.51
   5   4   8   -0.59    7.90
  -5   4  -8    3.77    5.44
   5  -4   8   13.18   10.03
   5   4   8   15.71    8.92
   5  -4   9  734.48   57.10
   5   4   9  798.58   55.83
   5  -4   9 1050.36   69.23
   5   4   9 1045.67   60.31
   5   4  10   10.45   10.28
   5  -4  10   11.03   10.04
   5  -4  10   12.09   10.57
   5   4  10   14.49    5.65
   5   4  11  489.54   39.00
   5  -4  11  495.98   50.60
   5   4  12    5.30   13.00
   5  -4  12   40.40   11.87
   5  -4  12   29.21   13.99
   5   4  13  168.70   18.50
   5   4  13  166.11   17.36
  -5   5  13   39.04   12.30
  -5   5  12  611.75   48.43
  -5   5  11   91.93   19.80
  -5  -5  11  130.28   29.62
   5  -5 -11   78.75   14.55
   5   5 -11  128.92   26.63
   5   5 -10  493.98   24.99
  -5  -5  10  653.66   61.75
   5   5  -9   19.59    8.13
  -5   5   9   26.82   11.67
  -5  -5   9   16.62   12.71
   5  -5  -9   31.76   11.08
   5   5  -9   26.43   12.60
   5   5  -8 1099.65   61.27
   5   5  -8 1114.02   59.26
  -5   5   8 1080.26   61.65
   5  -5  -8 1246.98   68.65
  -5  -5   8 1192.95   78.66
   5   5  -8 1173.37   80.49
   5  -5  -7   32.31    4.70
   5   5  -7   93.96   18.33
   5   5  -7   49.68   13.58
  -5   5   7   54.75   15.25
  -5  -5   7   83.11   21.81
   5   5  -7   95.94   24.72
   5   5  -6 1025.78   60.61
  -5   5   6 1063.98   58.68
   5   5  -6 1001.82   60.62
  -5  -5   6 1128.05   73.27
   5   5  -6 1066.72   72.31
   5  -5  -5  209.24   25.46
   5   5  -5  181.24   26.19
  -5   5   5  185.89   25.40
   5   5  -5  224.01   30.58
   5  -5  -5  225.14   30.43
  -5  -5   5  227.45   33.16
   5   5  -5  227.86   33.09
   5  -5  -4  452.81   37.96
   5   5  -4  425.95   41.69
  -5   5   4  456.50   38.10
   5   5  -4  501.23   43.19
   5  -5  -4  507.15   45.19
  -5  -5   4  489.25   47.55
   5   5  -3  354.73   37.26
   5  -5  -3  308.43   32.93
  -5   5   3  302.73   32.93
   5   5  -3  240.76   31.47
  -5  -5   3  377.71   40.58
   5  -5  -3  304.62   36.53
   5   5  -3  308.03   35.70
   5  -5  -2  630.83   46.66
   5   5  -2  782.88   55.37
   5   5  -2  742.73   51.54
  -5   5   2  731.04   49.02
   5  -5  -2  770.98   54.00
   5   5  -2  727.29   55.49
   5   5  -1   10.05    8.35
   5   5  -1   10.11    9.07
   5  -5  -1   11.18    9.15
  -5   5   1   11.52    7.35
   5  -5  -1   21.20   10.05
  -5  -5   1   22.45   12.40
   5   5  -1   27.66   11.50
   5  -5   0 1037.00   60.44
  -5   5   0 1143.36   60.32
   5   5   0 1049.35   59.48
  -5  -5   0 1078.58   67.97
   5  -5   0 1148.21   68.33
   5   5   0 1127.09   66.05
  -5   5  -1   17.58    8.72
   5   5   1   15.27    9.59
   5  -5   1   23.88   13.61
  -5  -5  -1   27.32   12.78
   5  -5   1   25.47   10.67
   5   5   1   23.70   10.97
   5  -5   2  801.17   57.77
   5   5   2  751.55   53.87
   5  -5   2  830.26   59.79
  -5   5  -2  721.33   47.97
   5   5   2  785.31   51.60
   5  -5   3  339.11   36.57
   5  -5   3  323.93   37.44
   5   5   3  279.57   32.51
  -5  -5  -3  224.26   29.55
  -5   5  -3  240.52   29.46
   5   5   3  290.06   30.84
   5  -5   4  536.80   46.49
   5   5   4  483.52   42.63
   5  -5   4  469.04   46.61
  -5  -5  -4  307.71   35.22
   5   5   4  374.01   37.03
  -5   5  -4  452.09   40.33
   5  -5   5  224.18   32.42
   5   5   5  212.96   29.54
  -5  -5  -5  151.27   25.64
   5  -5   5  238.69   33.21
   5   5   5  192.52   28.29
  -5   5  -5  213.10   26.73
   5  -5   6  781.96   57.75
   5   5   6  879.24   53.17
  -5   5  -6  996.24   57.73
   5   5   6 1101.22   63.46
   5  -5   6 1051.81   70.58
   5  -5   7   40.42   13.38
  -5   5  -7   62.04   14.57
   5   5   7   44.02   15.22
   5  -5   7   69.15   18.79
  -5  -5  -7   45.69   15.83
   5   5   7   61.99   16.52
   5  -5   8 1028.84   69.66
   5  -5   8 1065.63   74.34
  -5   5  -8  983.21   51.79
   5   5   8 1059.67   60.72
   5  -5   8 1199.49   75.41
   5   5   9   30.51   13.50
  -5   5  -9   24.39    9.20
   5  -5   9   31.51   14.47
   5  -5   9   37.88   16.28
   5   5   9   21.70    7.86
   5  -5  10  705.17   60.72
   5   5  10  592.99   43.80
   5   5  11   66.19   17.27
   5  -5  11  100.43   23.09
   5   5  11  103.46   18.50
   5  -5  11  125.65   27.64
   5   5  12  465.22   42.24
   5   5  12  442.03   33.66
   5   5  13   33.44    7.21
  -5   6  13  353.07   39.52
  -5   6  12   60.92   19.14
  -5   6  11  601.35   48.16
   5  -6 -11  516.60   33.17
   5   6 -10   40.60    9.81
   5   6 -10   26.12    9.57
  -5   6  10   10.10    7.31
  -5  -6  10   50.30   18.26
   5  -6 -10   30.83   12.19
   5   6  -9  435.46   36.70
   5  -6  -9  518.61   43.40
  -5  -6   9  528.49   55.71
   5   6  -9  484.99   53.43
   5   6  -8   21.50   13.34
  -5   6   8   18.17    8.04
   5   6  -8   17.51   10.00
   5  -6  -8   39.15   15.46
  -5  -6   8   39.29   18.31
   5   6  -8   36.09   17.45
   5   6  -7  597.75   49.16
  -5   6   7  638.10   48.14
   5   6  -7  654.45   51.53
  -5  -6   7  727.47   63.31
   5   6  -7  714.34   63.09
   5  -6  -6  286.91   24.30
   5   6  -6  482.35   43.77
  -5   6   6  405.45   38.16
   5   6  -6  254.45   33.45
  -5  -6   6  504.14   50.74
   5   6  -6  449.24   49.02
   5  -6  -5  769.38   46.10
   5   6  -5  737.38   55.90
  -5   6   5  871.17   55.27
   5   6  -5  869.40   58.55
   5  -6  -5  881.58   59.96
  -5  -6   5  931.20   69.09
   5  -6  -4  195.46   24.89
   5   6  -4  198.63   28.68
  -5   6   4  189.74   26.66
   5   6  -4  118.60   23.80
  -5  -6   4  234.03   34.11
   5  -6  -4  201.21   29.83
   5   6  -4  220.40   32.45
   5  -6  -3 1779.34   79.04
   5   6  -3 2417.34   99.03
  -5   6   3 2485.92   93.81
   5   6  -3 1581.27   79.79
   5  -6  -3 2393.13   98.20
   5   6  -3 2553.33  108.72
   5   6  -2  591.51   49.54
   5  -6  -2  668.47   51.84
  -5   6   2  717.76   50.70
   5   6  -2  504.53   45.70
  -5  -6   2  649.58   53.85
   5  -6  -2  688.77   53.31
   5   6  -2  608.65   51.99
   5   6  -1  651.58   52.60
   5  -6  -1  710.20   53.50
  -5   6   1  772.58   52.51
  -5  -6   1  752.72   58.37
   5   6  -1  677.13   54.10
   5   6   0   18.39    9.00
   5  -6   0   45.37   15.25
   5   6   0   18.75   11.09
  -5   6   0   42.35   13.39
   5  -6   0   26.51   11.14
  -5  -6   0   32.23   11.94
   5   6   0   32.79   12.26
   5  -6   1  747.60   55.13
  -5   6  -1  626.66   49.12
   5   6   1  595.72   48.94
  -5  -6  -1  499.75   47.25
   5  -6   1  776.67   57.61
   5   6   1  670.21   54.01
   5  -6   2  821.13   58.83
  -5   6  -2  763.56   51.16
   5   6   2  711.68   50.91
   5  -6   2  799.77   60.02
   5   6   2  699.69   53.48
   5  -6   3 2587.82  105.99
  -5  -6  -3 2158.72   97.15
   5  -6   3 2446.79  105.68
   5   6   3 2454.54   98.24
  -5   6  -3 2333.88   88.91
   5   6   3 1985.94   84.39
   5  -6   4  221.69   32.47
  -5   6  -4  188.80   25.95
   5   6   4  121.36   21.64
   5   6   4  179.32   27.21
   5  -6   4  226.77   32.64
  -5  -6  -4   86.39   19.49
  -5   6  -5  821.35   53.13
   5  -6   5  870.97   65.00
   5  -6   6  416.03   44.73
   5   6   6  268.16   31.36
  -5   6  -6  375.95   37.26
  -5  -6  -6  283.45   34.63
   5   6   6  315.66   36.32
   5  -6   7  577.77   53.08
   5  -6   7  613.11   57.20
  -5   6  -7  697.18   48.79
   5  -6   7  670.97   57.83
   5   6   7  684.51   50.82
   5   6   8   12.83   10.10
  -5   6  -8   31.87   11.12
   5  -6   8   26.42   15.24
   5   6   8   20.31    6.68
   5  -6   8   24.02   13.37
  -5   6  -9  385.90   32.83
   5  -6   9  467.67   50.76
   5  -6   9  438.85   51.45
   5   6   9  373.70   36.47
   5   6  10   49.24   17.82
   5  -6  10   58.31   17.94
   5   6  10   30.31   10.61
   5  -6  10   49.73   20.67
   5  -6  11  592.09   58.84
   5  -6  11  642.40   61.69
   5   6  12   61.20   13.76
   5   6  13  206.69   16.58
  -5   7  13   70.41   18.00
  -5   7  12  573.49   48.21
  -5   7  11   34.86   14.10
  -5  -7  11   40.03   17.17
   5   7 -10  452.25   36.75
  -5   7  10  621.18   48.96
   5   7 -10  412.12   36.52
  -5  -7  10  633.77   63.12
   5  -7 -10  544.82   40.40
   5   7 -10  628.70   65.05
   5   7  -9   32.19   12.97
   5   7  -9   19.16   13.00
  -5   7   9   28.74   11.57
  -5  -7   9   58.22   21.76
   5  -7  -9   47.23   17.03
   5   7  -9   52.36   20.16
   5   7  -8  355.13   42.67
   5   7  -8  370.56   40.69
  -5  -7   8  418.85   52.12
   5  -7  -8  401.64   44.09
   5   7  -8  509.85   56.71
   5   7  -7   38.77   14.69
   5   7  -7   14.66    9.75
  -5  -7   7   50.39   20.63
   5   7  -7   64.24   19.63
   5   7  -6  802.82   60.10
   5  -7  -6  659.03   38.30
  -5   7   6  846.96   55.77
   5   7  -6  926.74   63.01
  -5  -7   6  858.32   69.72
   5   7  -5  384.66   40.19
  -5   7   5  349.02   37.72
   5   7  -5  344.08   40.08
  -5  -7   5  405.10   47.23
   5  -7  -5  374.40   41.97
   5   7  -5  357.56   43.54
   5  -7  -4 1923.91   78.94
   5   7  -4 1920.95   89.70
   5   7  -4 1856.88   91.79
  -5   7   4 1990.73   87.69
  -5  -7   4 2124.74  103.10
   5  -7  -4 2094.64   94.41
   5   7  -4 1963.90   98.75
   5   7  -3   43.23   12.94
   5  -7  -3   34.65   13.03
   5   7  -3   41.77   14.35
  -5   7   3   35.36   11.61
   5  -7  -3   46.04   14.15
  -5  -7   3   34.44   16.71
   5   7  -3   47.28   14.69
   5  -7  -2  914.22   60.65
   5   7  -2  867.06   64.18
   5   7  -2  722.85   53.79
  -5   7   2 1026.53   63.01
  -5  -7   2 1068.98   74.13
   5  -7  -2 1139.70   70.99
   5   7  -2 1101.44   71.82
   5   7  -1  151.70   25.89
   5   7  -1  120.13   20.89
   5  -7  -1  157.33   27.19
  -5   7   1  187.31   27.05
  -5  -7   1  107.89   24.43
   5   7  -1  131.31   25.55
   5   7   0  360.80   38.71
   5  -7   0  283.67   34.97
  -5   7   0  323.61   37.13
   5   7   0  222.31   31.14
  -5  -7   0  362.41   43.18
   5  -7   0  358.90   40.94
   5   7   0  371.64   42.06
   5   7   1  125.53   24.42
  -5   7  -1  157.62   24.38
   5  -7   1  117.67   23.84
   5   7   1  156.95   25.78
   5  -7   1  137.18   25.22
  -5  -7  -1   67.91   18.58
   5   7   1  116.04   24.00
   5   7   2 1061.61   67.94
   5  -7   2  728.56   55.29
   5   7   2  992.10   65.20
  -5   7  -2 1024.25   63.91
  -5  -7  -2  682.67   55.82
   5  -7   2  938.18   67.95
   5   7   2 1138.07   69.65
   5  -7   3   63.53   15.72
   5   7   3   58.20   16.56
  -5   7  -3   45.97   14.91
  -5  -7  -3   32.48   11.75
   5  -7   3   39.67   14.63
   5   7   3   52.59   15.96
   5   7   4 1744.07   84.79
  -5   7  -4 1763.77   80.05
   5  -7   4 1967.94   97.81
   5  -7   5  404.55   43.07
  -5   7  -5  298.29   33.53
   5   7   5  233.65   31.11
   5  -7   5  439.52   48.00
  -5  -7  -5  176.72   29.21
   5   7   5  355.84   38.76
   5  -7   6  481.94   47.71
  -5   7  -6  812.61   55.52
   5   7   6  553.81   45.87
   5  -7   6  860.58   68.09
   5   7   6  771.32   55.59
   5  -7   6  868.41   71.29
  -5   7  -7   44.35   14.81
   5  -7   7   53.50   15.42
   5   7   7   34.33   13.07
   5  -7   7   35.43   18.23
  -5   7  -8  322.81   36.87
   5  -7   8  464.61   51.72
   5  -7   8  427.66   50.99
   5   7   8  416.34   41.30
   5   7   9   21.29   13.67
  -5   7  -9   22.29   11.38
   5  -7   9   42.05   16.92
   5   7   9   33.66   10.48
   5  -7   9   40.06   18.45
   5   7  10  408.63   39.58
  -5   7 -10  434.20   31.23
   5   7  11    7.81   10.10
   5  -7  11   32.71   16.99
  -5   8  12  117.93   25.33
  -5   8  11  208.00   31.62
   5   8 -10   43.28   14.12
  -5   8  10   30.76   13.15
   5   8 -10   33.11   16.26
  -5  -8  10   17.22   15.63
   5  -8 -10   17.68   11.15
   5   8 -10   39.69   21.07
   5   8  -9  240.13   34.71
  -5   8   9  345.83   39.03
   5   8  -9  163.74   26.66
  -5  -8   9  392.91   51.91
   5  -8  -9  376.74   39.02
   5   8  -9  253.24   45.71
  -5   8   8   11.27   10.37
   5  -8  -8   15.02   11.17
  -5  -8   8   26.77   14.93
   5   8  -8   32.12   11.27
   5   8  -7  301.51   37.52
  -5   8   7  325.00   37.77
   5  -8  -7  302.02   39.90
  -5  -8   7  300.49   48.22
   5   8  -7  322.82   45.00
  -5   8   6  109.45   20.73
   5  -8  -6   42.96   10.96
   5   8  -6   63.09   18.11
   5   8  -6  111.86   27.39
   5   8  -5 1857.89   93.06
   5  -8  -5 1854.79   92.64
  -5  -8   5 1853.41  104.39
   5   8  -5 1938.55  104.49
   5   8  -4   25.05   11.84
   5  -8  -4   12.05    8.04
   5  -8  -4   35.43   12.33
  -5  -8   4   41.11   17.51
   5   8  -4   47.00   17.58
   5  -8  -3  959.97   60.61
   5  -8  -3  916.42   66.71
  -5  -8   3 1072.83   75.56
   5   8  -3  940.10   69.66
   5  -8  -2   -1.84    6.28
   5  -8  -2   10.55    8.65
  -5  -8   2    2.18    8.02
   5   8  -2    0.17    6.55
   5  -8  -1 1808.55   88.97
   5  -8  -1 1659.19   92.13
  -5  -8   1 1669.81   95.24
   5   8  -1 1709.79   92.25
   5  -8   0  210.64   30.85
  -5  -8   0  156.94   29.38
   5  -8   0  223.77   34.09
   5   8   0  183.45   30.72
   5  -8   1 1164.63   73.52
  -5  -8  -1 1181.07   75.00
   5  -8   1 1617.65   90.69
   5   8   1 1619.99   88.53
   5   8   2    7.54    9.61
  -5  -8  -2    7.21   10.24
   5  -8   2    4.87    8.66
   5   8   2    5.06    7.13
   5  -8   3  810.07   68.87
   5  -8   3 1009.12   72.80
   5   8   3  966.86   66.02
   5  -8   3  906.91   71.32
   5  -8   4   37.73   18.98
   5  -8   4    6.12    9.11
  -5  -8  -4   24.84   13.01
   5  -8   4   39.30   14.55
   5   8   4   18.62   12.43
   5  -8   5 1486.13   91.42
   5  -8   5 1743.89  100.54
   5   8   5 1772.51   90.59
   5  -8   6  114.68   26.33
   5   8   6   60.27   19.63
   5  -8   7  342.72   44.49
   5   8   7  281.20   35.97
   5  -8   7  325.36   46.81
  -5   8  -8   21.36   10.88
   5   8   8    3.52   10.65
   5  -8   8   24.41   15.32
   5   8   8   18.52    9.50
   5  -8   8   18.46   13.49
  -5   8  -9  255.16   30.10
   5  -8   9  303.20   45.73
   5  -8   9  265.55   42.44
   5   8   9  243.49   32.71
  -5   8 -10   34.00   12.34
   5  -8  10   46.28   20.34
   5   8  10   26.91   10.22
   5  -8  10   76.03   26.14
   5   8  12   82.99   25.13
  -5   9  12  357.85   42.25
  -5   9  11   39.29   17.77
  -5   9  10  475.97   47.46
   5   9 -10  325.46   36.34
   5  -9 -10  458.17   43.52
   5   9  -9   44.09   15.69
  -5   9   9   48.65   16.85
   5  -9  -9   48.13   18.87
  -5  -9   9   68.51   27.13
   5   9  -9   75.06   26.30
   5   9  -8  378.36   44.89
  -5   9   8  326.94   38.89
   5   9  -8  212.40   36.48
   5  -9  -8  316.70   42.30
   5   9  -8  332.78   48.46
   5   9  -7   21.69   13.48
  -5   9   7   15.08   10.93
   5   9  -7   -8.26   16.02
  -5  -9   7   30.05   20.30
   5  -9  -7   17.98   12.37
   5   9  -7    7.48   12.16
   5   9  -6  602.39   55.60
   5  -9  -6  255.68   23.75
   5   9  -6  220.02   34.78
  -5   9   6  702.04   55.44
  -5  -9   6  518.97   64.67
   5   9  -6  622.64   64.78
   5   9  -5   31.42   17.77
   5  -9  -5   25.27    8.73
   5   9  -5    6.09   14.26
  -5   9   5   36.50   14.34
  -5  -9   5   34.63   18.34
   5  -9  -5    6.99   10.44
   5   9  -5   19.28   11.59
   5  -9  -4  956.58   61.69
   5   9  -4 1283.86   80.23
  -5   9   4 1289.28   74.62
   5  -9  -4 1370.64   83.31
  -5  -9   4  975.68   85.52
   5   9  -4 1264.32   84.83
   5   9  -3   40.86   16.62
   5  -9  -3   38.58   15.26
   5   9  -3   27.11   15.76
  -5   9   3   63.95   16.05
   5  -9  -3   49.47   19.06
  -5  -9   3   39.71   20.94
   5   9  -3   77.89   21.84
   5  -9  -3   46.33   16.33
   5  -9  -2  966.42   65.64
   5   9  -2 1071.98   72.83
   5   9  -2  952.85   66.93
  -5   9   2  999.15   66.72
  -5  -9   2  874.81   74.12
   5  -9  -2  975.37   77.78
   5   9  -2 1046.03   77.30
   5   9  -1    6.15    7.78
   5  -9  -1   18.81   16.55
   5  -9  -1    6.14    9.42
   5   9  -1   -6.14   12.04
  -5   9   1    1.90    5.58
  -5  -9   1   10.78   12.70
   5  -9  -1    1.40    7.83
   5   9  -1    0.55    7.41
   5   9   0  999.67   70.56
  -5   9   0 1006.64   68.35
   5  -9   0 1138.09   77.66
  -5  -9   0 1129.43   78.53
   5  -9   0 1126.54   82.98
   5   9   0 1074.57   74.15
   5   9   1   21.19   12.66
   5  -9   1    8.68    8.71
  -5   9  -1   -3.72    6.67
   5   9   1   -3.26   13.17
   5  -9   1   -4.30   11.93
   5   9   1   10.94   11.60
   5  -9   1   -1.68   11.58
   5  -9   2 1011.82   75.28
   5   9   2 1031.73   71.09
  -5   9  -2 1077.82   69.67
   5  -9   2 1003.74   76.08
  -5  -9  -2 1073.59   78.42
   5  -9   2  980.88   77.47
   5   9   2  919.16   67.23
   5  -9   3   69.94   20.51
   5   9   3   68.17   18.85
   5   9   3   29.77    7.69
  -5   9  -3   83.70   21.58
  -5  -9  -3   54.53   19.57
   5  -9   3  117.86   26.50
   5   9   3   79.52   20.49
   5  -9   3   85.69   23.23
   5   9   4 1400.24   80.52
  -5   9  -4 1335.53   81.24
   5  -9   4 1422.31   91.18
   5  -9   4 1118.99   82.34
   5   9   4 1193.60   77.19
   5   9   5   40.36   13.73
   5   9   5   -0.74   12.32
  -5   9  -5   33.04   15.00
   5  -9   5   28.73   12.65
   5  -9   5   60.35   20.95
   5   9   5   17.50    9.47
   5   9   6  647.80   55.91
  -5   9  -6  542.11   48.93
   5  -9   6  665.23   63.47
   5  -9   6  651.10   65.30
   5   9   6  495.83   51.52
   5   9   7   -4.93    9.49
  -5   9  -7   -1.95    8.36
   5  -9   7   16.49   16.42
   5   9   7    4.90    8.10
   5   9   8  363.08   42.67
  -5   9  -8  336.60   39.21
   5  -9   8  363.96   51.27
   5   9   8  287.81   37.57
   5   9   9   37.01   18.64
   5  -9   9   61.31   20.44
   5   9   9   58.57   19.05
   5  -9   9   50.84   21.97
  -5   9 -10  412.32   37.18
   5   9  10  408.79   44.53
   5   9  10  359.23   39.49
   5   9  11   73.53   23.33
   5   9  12  352.96   44.48
  -5  10  10   24.26   14.06
   5  10 -10   17.42   13.23
   5  10  -9  298.30   43.34
  -5  10   9  371.94   43.74
   5 -10  -9  269.44   40.95
  -5 -10   9  416.68   61.74
   5  10  -9  428.72   61.87
   5  10  -8   43.45   20.67
  -5  10   8   23.67   10.56
  -5 -10   8   -3.02   16.27
   5 -10  -8   53.35   19.11
   5  10  -8   10.13   15.34
   5  10  -7  366.62   50.11
  -5  10   7  495.38   49.37
   5 -10  -7  529.15   52.66
  -5 -10   7  354.79   59.42
   5  10  -7  456.61   60.32
   5 -10  -6   96.86   14.03
   5  10  -6  129.56   30.28
  -5  10   6  146.86   27.38
  -5 -10   6   88.37   28.57
   5  10  -6  109.81   30.27
   5  10  -5  378.00   46.74
   5 -10  -5  384.33   34.97
  -5  10   5  529.56   50.11
  -5 -10   5  432.11   58.18
   5 -10  -5  400.47   47.41
   5  10  -5  392.53   51.66
   5  10  -4    7.71    9.34
   5 -10  -4   12.82    9.56
  -5  10   4   18.74   10.55
   5 -10  -4   11.51   11.93
  -5 -10   4   14.14   16.29
   5  10  -4   12.65   12.60
   5 -10  -3  630.37   54.77
   5  10  -3  865.68   68.30
  -5  10   3 1055.79   71.22
  -5 -10   3  786.07   74.91
   5 -10  -3 1144.90   80.07
   5  10  -3  937.96   79.32
   5  10  -2   83.43   25.30
   5 -10  -2   38.62   14.61
  -5  10   2   89.26   21.45
  -5 -10   2   67.19   22.02
   5 -10  -2   59.74   20.34
   5  10  -2   59.09   23.85
   5  10  -1 1285.78   84.17
  -5  10   1 1365.59   82.46
   5 -10  -1 1476.90   92.01
   5  10  -1 1302.12   89.11
   5 -10   0   41.23   14.72
   5  10   0   53.39   19.51
  -5  10   0   36.42   16.77
  -5 -10   0   26.36   15.50
   5 -10   0   37.73   17.78
   5  10   1 1141.59   80.49
   5 -10   1 1122.92   78.44
  -5  10  -1 1281.67   78.08
   5 -10   1 1356.53   90.13
   5 -10   1  922.98   77.79
   5  10   1 1385.88   88.33
   5  10   2   77.85   23.08
  -5  10  -2   73.32   19.53
   5 -10   2   93.82   23.06
   5 -10   2   95.48   28.21
   5  10   2   80.80   22.16
   5  10   3  886.35   70.06
  -5  10  -3 1039.61   72.64
   5 -10   3 1098.02   84.68
   5  10   3 1005.72   76.06
   5 -10   3  945.80   79.83
   5  10   4   23.33   11.16
  -5  10  -4   14.56   10.60
   5 -10   4   14.87    8.70
   5  10   4   11.50    9.28
   5 -10   4   23.54   13.63
   5  10   5  503.65   53.35
  -5  10  -5  370.05   45.14
   5 -10   5  552.79   60.26
   5 -10   5  441.23   56.78
   5  10   5  449.37   51.10
   5  10   6  158.01   30.62
  -5  10  -6  130.59   26.93
   5 -10   6  167.09   38.91
   5 -10   6  167.30   34.04
   5  10   6  107.30   26.06
   5  10   7  525.90   54.00
  -5  10  -7  421.60   47.35
   5 -10   7  527.75   60.42
   5  10   7  365.42   43.63
   5 -10   7  456.98   57.91
  -5  10  -8   29.29   11.81
   5  10   8   35.17   17.16
   5 -10   8   -1.97   19.52
   5  10   8   30.48   16.37
   5  10   9  361.53   46.39
  -5  10  -9  365.94   40.60
   5 -10   9  351.09   52.06
   5  10   9  282.89   39.27
  -5  10 -10   21.60   14.45
   5  10  10   21.34   13.69
   5  10  11  377.43   49.09
  -5  11  11   28.16   18.15
   5  11 -10  180.53   39.66
   5  11  -9  -19.42   18.17
   5  11  -9    3.98   20.46
   5  11  -8  580.40   60.12
  -5  11   8  587.05   55.30
  -5 -11   8  427.63   72.02
   5 -11  -8  433.02   49.05
   5  11  -8  602.19   74.77
   5  11  -7   25.15   15.65
  -5  11   7   26.19   13.60
   5 -11  -7   31.24   17.18
  -5 -11   7   27.18   21.20
   5  11  -7   15.64   14.35
   5  11  -6  424.08   53.30
   5 -11  -6  238.04   22.31
  -5  11   6  446.06   48.68
  -5 -11   6  267.65   57.17
   5  11  -6  420.41   61.80
   5  11  -5  170.43   34.33
   5 -11  -5  109.75   18.61
  -5  11   5  194.75   31.83
  -5 -11   5  134.67   38.40
   5 -11  -5  178.06   31.35
   5  11  -5  146.95   35.08
   5  11  -4  264.93   41.28
   5 -11  -4  177.85   30.17
  -5  11   4  330.43   41.45
   5 -11  -4  303.56   43.04
   5  11  -4  259.92   44.83
   5  11  -3   34.69   18.03
   5 -11  -3   65.56   19.89
  -5  11   3   72.50   21.05
   5 -11  -3   81.46   26.12
   5  11  -3   53.33   22.74
   5  11  -2  843.71   69.22
  -5  11   2  973.19   72.54
   5 -11  -2 1038.58   80.82
   5  11  -1   49.54   17.15
   5 -11  -1   14.75   15.74
  -5  11   1   37.20   15.56
  -5 -11   1   29.22   18.73
   5 -11  -1   59.12   19.80
   5  11  -1   20.04   13.49
   5  11   0  466.09   52.66
  -5  11   0  512.25   54.68
   5 -11   0  511.82   56.92
   5  11   0  477.92   57.54
   5 -11   0  476.84   55.94
   5  11   1   30.62   14.92
  -5  11  -1   36.35   17.38
   5 -11   1   28.60   12.55
   5 -11   1   31.45   19.10
   5  11   1   18.73   13.36
   5  11   2  895.23   71.71
  -5  11  -2  856.37   66.40
   5 -11   2  950.63   81.51
   5  11   2  784.24   71.67
  -5  11  -3   75.51   22.22
   5  11   3   82.09   22.41
   5  11   3   34.89   16.34
   5  11   4  396.09   45.45
  -5  11  -4  332.78   41.83
   5 -11   4  392.52   53.98
   5  11   4  353.37   47.65
   5 -11   4  321.09   48.84
   5  11   5  147.07   29.36
  -5  11  -5  172.27   30.18
   5 -11   5  161.90   36.78
   5 -11   5  113.98   34.00
   5  11   5  152.57   32.62
   5  11   6  407.47   48.34
  -5  11  -6  377.88   45.02
   5 -11   6  490.15   61.77
   5 -11   6  446.61   60.13
   5  11   7   22.36   14.24
  -5  11  -7   25.06   15.23
   5 -11   7    8.28   13.33
   5  11   7   29.24   10.74
   5 -11   7   58.91   25.48
   5  11   8  431.32   56.26
  -5  11  -8  568.01   57.11
   5 -11   8  659.89   72.53
   5 -11   8  539.53   68.52
  -5  11  -9   -5.15   15.11
   5  11   9   11.59   12.65
  -5  11 -10  356.38   42.25
   5  11  11  -11.30   22.76
  -5  12   9  479.42   54.18
  -5  12   8   -5.96   16.91
   5  12  -8   -0.67   20.23
   5 -12  -7   -8.98   16.40
   5  12  -7  442.35   61.37
   5  12  -6   24.81   16.32
   5 -12  -6  -21.43   11.43
  -5  12   6   10.72   15.88
  -5 -12   6  -23.19   26.89
   5  12  -6   16.77   18.26
   5 -12  -5  235.11   32.65
   5  12  -5  169.46   33.95
   5 -12  -5  295.08   43.54
  -5 -12   5  225.14   47.30
  -5  12   5  322.12   44.01
   5  12  -4   81.91   27.40
   5 -12  -4   53.42   16.46
  -5  12   4  102.38   25.11
  -5 -12   4   47.33   23.63
   5 -12  -4  135.96   32.55
   5  12  -3  306.61   50.30
   5 -12  -3  254.59   39.59
   5  12  -3  404.12   61.94
   5  12  -2   12.75   15.98
   5 -12  -2   10.25   14.33
  -5  12   2   18.91   12.16
   5 -12  -2   30.05   17.79
   5  12  -2   22.82   12.61
   5  12  -1  491.96   57.04
  -5  12   1  640.19   60.02
   5 -12  -1  540.30   63.46
   5  12  -1  590.11   66.36
   5  12   0   74.82   26.67
  -5  12   0  111.53   26.54
   5 -12   0  141.86   33.20
   5  12   0  109.23   30.04
   5  12   1  555.50   61.69
  -5  12  -1  565.63   58.92
   5 -12   1  632.36   68.33
   5  12   1  537.33   62.03
   5  12   2   27.01   17.79
  -5  12  -2   10.13   12.56
   5 -12   2    8.53   13.97
   5  12   2   14.21   13.81
   5  12   3  540.61   60.76
  -5  12  -3  407.97   49.23
   5 -12   3  519.56   62.96
   5 -12   3  400.99   58.83
   5  12   3  482.77   56.58
   5  12   4   33.78   22.62
  -5  12  -4   70.02   22.19
   5 -12   4   75.30   25.64
   5  12   4   89.47   26.61
   5 -12   4   32.61   19.81
   5  12   5  241.91   40.96
  -5  12  -5  267.66   40.25
   5 -12   5  247.90   41.80
   5  12   6   23.55   15.37
  -5  12  -6   20.54   13.86
   5 -12   6   27.17   17.50
   5  12   6   12.59   13.32
   5 -12   7  424.82   63.37
   5 -12   7  389.59   60.19
  -5  12  -9  359.50   46.73
   5  12   9  398.09   53.42
  -5  13   7  -22.09   19.89
   5  13  -7  -37.88   25.85
  -5  13   6  419.49   50.74
   5  13  -6  271.79   50.97
   5  13  -6  383.36   61.64
   5 -13  -5   37.62   15.90
   5  13  -5   -2.28   13.16
  -5  13   5    5.72   12.54
   5 -13  -5   -8.10   20.56
   5  13  -5  -21.28   22.86
   5  13  -4  534.27   62.81
   5 -13  -4  495.50   48.79
  -5  13   4  604.87   61.38
   5 -13  -4  648.65   65.80
   5  13  -4  517.22   67.22
   5  13  -3   40.90   18.82
   5 -13  -3   85.39   25.94
   5 -13  -3   79.15   26.06
   5  13  -3   89.47   35.00
   5 -13  -2  159.07   37.52
   5  13  -2  168.57   41.89
   5 -13  -1   97.72   28.68
   5  13  -1  117.90   30.28
   5 -13   0  288.00   46.11
   5  13   0  164.67   40.32
   5 -13   1   65.74   24.49
   5  13   1   45.45   21.08
   5 -13   2  291.17   50.94
   5  13   2  227.79   42.56
  -5  13  -3   63.16   23.70
   5 -13   3   60.27   25.49
  -5  13  -4  562.61   61.80
   5 -13   4  537.94   67.19
   5  13   4  458.87   61.44
   5  13   5   11.21   16.08
   5 -13   5   25.16   18.02
  -5  13  -5   18.74   14.18
  -5  13  -6  413.99   53.75
   5  13   6  417.91   58.26
  -5  13  -7   33.08   20.28
   5  13   7    5.35   13.93
  -5  13  -8  220.08   36.45
  -5  13  -9  -15.90   22.46
   5  14  -6    8.65   21.36
   5  14  -5  613.33   81.31
   5 -14  -4   -8.81   19.27
   5  14  -4   36.37   22.90
   5 -14  -3  323.36   52.13
   5  14  -3  230.44   48.47
  -5  14   2   20.40   18.06
   5 -14  -2   17.52   22.76
   5  14  -2  -43.87   28.34
   5  14  -1  187.25   40.10
  -5  14   1  284.94   43.90
   5 -14  -1  255.20   47.35
   5  14  -1  211.22   46.43
   5  14   0   15.83   17.50
   5 -14   0    4.47   19.51
  -5  14   0   10.75   13.28
  -5  14  -1  299.30   45.82
   5  14   1  223.65   41.98
   5  14   2   14.84   13.59
   5 -14   2   -4.28   16.83
   5  14   2    7.16   15.89
   5  14   3  195.46   43.32
   5 -14   3  238.83   46.74
   5  14   3  178.33   44.00
   5 -14   4  -12.31   22.39
   5 -14   6   17.47   25.19
   5  15  -6  320.40   63.22
   5 -15  -2  250.93   52.42
   5  15  -2  261.54   54.06
   5 -15  -1   25.82   29.23
   5  15  -1  -14.92   23.67
   5  15   0  261.12   54.86
   5 -15   1   29.53   21.75
   5 -15   2  334.71   60.88
   5 -15   3   32.97   20.71
   5 -16   1  513.87   77.58
   5 -16   2   46.82   36.46
  -6   0  11   17.10   16.21
   6   0 -11  -17.61   17.85
  -6   0  10 1296.87   82.30
   6   0 -10 1224.57   77.68
  -6   0   9  -23.23   14.81
   6   0  -8  858.73   42.26
  -6   0   8 1000.12   66.65
  -6   0   8  989.22   70.25
   6   0  -7    4.43    5.69
  -6   0   7    2.08    9.33
   6   0  -7   12.48    8.27
   6   0  -6  120.00   20.55
  -6   0   6  173.53   28.21
   6   0  -6  213.64   30.34
   6   0  -6  229.64   32.26
  -6   0   6  220.92   33.25
   6   0  -5    0.65    6.38
   6   0  -5    5.27    7.39
  -6   0   5    1.92    7.08
  -6   0   5    8.52    8.29
   6   0  -5   11.35   10.57
   6   0  -4 1859.53   84.36
  -6   0   4 1594.65   84.04
   6   0  -4 1752.49   87.41
  -6   0   3   -5.54    4.49
   6   0  -3    2.89    8.49
  -6   0   3    6.84   11.17
  -6   0   2 1824.90   81.13
   6   0  -2 1832.96   84.88
  -6   0   2 1956.39   94.48
  -6   0   1   -8.55    7.84
   6   0  -1    7.23    8.00
   6   0  -1    8.12   10.02
   6   0   0  497.85   44.07
  -6   0   0  429.84   41.56
  -6   0   0  495.00   46.69
   6   0   0  526.19   47.19
   6   0   1   -5.51    8.47
  -6   0  -1   -5.95    6.65
  -6   0  -1   -9.98   10.63
   6   0   1    0.05    7.70
   6   0   2 1755.34   82.99
  -6   0  -2 1576.48   74.82
   6   0   2 1676.79   84.70
   6   0   3   -2.68    9.09
  -6   0  -3   -5.85    8.28
   6   0   3   -1.83    5.84
  -6   0  -3  -10.01   10.43
   6   0   4 1639.58   80.60
   6   0   4 1807.10   85.83
   6   0   5    6.23    9.23
   6   0   5   -2.97    6.82
   6   0   6  251.07   33.49
   6   0   6  242.39   31.36
   6   0   7    6.46    8.54
   6   0   8  613.99   52.74
   6   0   8  925.78   63.20
   6   0   9   -4.37   11.25
   6   0   9   -6.59   11.22
   6   0  10 1136.30   70.12
   6   0  11   -3.46   10.85
  -6   1  11  557.12   54.26
  -6  -1  11  445.59   52.52
   6  -1 -11  459.50   46.61
   6   1 -11  529.26   52.79
  -6   1  10   97.19   23.15
  -6  -1  10   50.64   18.76
  -6   1  10   89.72   22.22
   6  -1 -10   95.83   21.04
   6   1 -10   79.35   22.42
  -6   1   9 1201.88   76.96
   6  -1  -9 1130.20   72.29
   6   1  -8  183.65   21.45
   6  -1  -8  146.27   17.55
   6  -1  -8  141.14   15.73
   6   1  -8  176.38   21.09
  -6   1   8  187.47   27.91
   6   1  -8  205.95   32.83
   6  -1  -7  435.15   34.40
   6  -1  -7  610.14   39.89
   6   1  -7  467.82   39.00
   6  -1  -7  721.08   56.86
   6   1  -7  811.17   61.08
  -6   1   7  751.42   58.98
  -6  -1   7  706.10   57.65
   6   1  -7  478.41   40.04
   6  -1  -6 1074.01   59.75
   6   1  -6 1123.84   62.25
  -6   1   6 1349.71   78.48
   6  -1  -6 1307.19   74.43
  -6  -1   6 1300.12   78.32
   6   1  -6 1274.28   76.77
   6  -1  -6 1052.33   58.75
  -6   1   6 1085.70   66.53
   6   1  -6  915.86   57.29
   6   1  -5  536.40   46.09
  -6   1   5  563.69   45.31
  -6  -1   5  599.52   48.16
   6  -1  -5  479.70   40.74
   6   1  -5  449.78   40.71
   6  -1  -5  559.29   49.07
   6   1  -5  566.37   51.07
  -6   1   5  613.65   52.81
  -6  -1   5  656.24   55.76
   6  -1  -4   19.99    8.60
  -6  -1   4   22.70   10.13
  -6   1   4   33.72   12.10
   6   1  -4   16.19    9.30
  -6  -1   4   36.94   13.85
   6  -1  -4   35.44   13.63
  -6   1   4   58.13   18.29
   6   1  -4   29.80   11.19
   6   1  -3  823.59   56.94
  -6   1   3  801.77   56.59
  -6  -1   3 1004.04   60.82
   6  -1  -3  831.90   55.39
  -6   1   3 1071.33   68.38
  -6  -1   3  972.63   67.63
   6  -1  -3  958.50   63.50
  -6  -1   2  131.08   21.38
  -6   1   2   84.89   20.43
   6  -1  -2   71.32   17.94
   6   1  -2  101.21   21.56
   6   1  -2  102.16   20.85
   6  -1  -2   98.29   21.56
  -6  -1   2  127.77   24.63
  -6   1   2  130.35   24.42
   6   1  -1  489.08   45.40
  -6   1   1  736.91   50.24
  -6  -1   1  619.08   49.74
   6  -1  -1  567.40   47.69
   6   1  -1  663.32   53.42
   6  -1  -1  639.41   53.27
  -6   1   1  706.91   56.58
   6   1   0  186.97   28.40
  -6   1   0  201.71   27.30
  -6  -1   0  175.26   26.98
   6  -1   0  188.47   28.87
   6  -1   0  191.18   28.34
  -6   1   0  192.08   30.48
  -6  -1   0  220.98   32.04
   6   1   0  213.08   29.83
   6   1   1  683.61   52.14
  -6   1  -1  594.02   46.41
   6  -1   1  645.27   50.77
   6  -1   1  631.81   51.32
  -6   1  -1  506.50   48.26
  -6  -1  -1  471.10   47.24
   6   1   1  649.36   52.13
   6  -1   2   88.45   21.18
  -6   1  -2   84.59   19.38
   6   1   2   93.06   18.62
   6  -1   2   86.66   20.09
   6   1   2   86.97   19.65
  -6   1  -2   74.88   19.11
  -6  -1  -2   81.92   18.99
   6   1   3  801.38   53.45
   6  -1   3  708.02   54.50
  -6   1  -3  868.51   56.53
   6  -1   3  886.51   61.96
  -6  -1  -3  782.63   62.80
   6   1   3  972.43   64.40
  -6   1  -4   14.57    7.47
   6  -1   4   15.05   11.08
   6   1   4    6.75    6.80
   6  -1   4   15.69    9.24
  -6  -1  -4   -6.15   10.89
   6   1   5  521.31   46.05
   6  -1   5  460.41   45.31
   6  -1   5  553.72   50.81
   6   1   5  628.14   51.87
   6  -1   6 1176.91   73.66
   6   1   6 1062.04   68.58
   6  -1   7  530.52   53.52
   6  -1   7  607.93   53.13
   6   1   7  638.39   51.93
   6  -1   8  199.74   33.45
   6  -1   8  236.60   32.87
   6   1   8  217.24   31.29
   6  -1   9  935.23   64.60
   6   1   9 1005.90   66.40
   6   1  10   79.82   21.50
   6  -1  10   58.73   16.11
   6   1  11  459.02   44.75
   6  -1  11  433.26   43.76
  -6   2  11   23.63   12.10
  -6  -2  11   13.47   14.08
   6   2 -11    5.17   15.42
  -6   2  10  366.46   42.86
  -6  -2  10  370.26   44.75
   6  -2 -10  357.00   41.56
   6   2 -10  392.07   44.77
   6   2  -9   14.36    5.39
  -6   2   9   44.01   14.57
  -6  -2   9   51.46   22.23
  -6   2   9   68.30   18.50
   6  -2  -9   50.94   16.57
   6   2  -8  395.92   33.54
   6  -2  -8  281.16   17.87
  -6   2   8  442.90   42.45
  -6  -2   8  547.78   53.97
   6   2  -8  518.45   51.87
   6  -2  -7  115.11   17.65
   6   2  -7  126.78   20.69
   6   2  -7   82.00   15.57
   6  -2  -7   66.23   13.66
  -6  -2   7  143.22   25.53
  -6   2   7  159.41   28.39
   6  -2  -7  130.27   25.41
   6   2  -7  144.65   26.16
   6  -2  -6  960.28   54.39
   6  -2  -6 1440.10   67.26
   6   2  -6 1460.94   71.82
   6  -2  -6 1475.93   80.59
   6   2  -6 1661.16   87.50
  -6   2   6 1717.58   88.53
  -6  -2   6 1791.10   92.78
  -6   2   6 1475.04   74.10
   6   2  -6 1145.86   65.39
   6   2  -5 1057.52   65.18
   6  -2  -5  994.55   57.28
   6   2  -5  992.97   67.66
  -6   2   5 1202.51   74.28
  -6  -2   5 1074.20   73.02
   6  -2  -5 1173.75   71.52
  -6   2   5 1051.66   61.96
   6   2  -4  536.13   47.48
  -6   2   4  647.21   48.63
   6   2  -4  676.62   52.76
   6  -2  -4  519.56   44.17
   6   2  -4  639.07   52.94
  -6   2   4  689.58   55.84
   6  -2  -4  668.14   54.23
  -6  -2   4  665.48   55.34
  -6   2   3  528.24   45.55
   6   2  -3  560.19   47.82
   6  -2  -3  562.93   45.59
  -6   2   3  639.45   54.67
   6  -2  -3  530.71   48.86
  -6  -2   3  619.41   53.07
   6   2  -3  578.59   50.70
  -6   2   2 1123.32   62.81
   6   2  -2  901.31   57.64
   6  -2  -2  915.02   59.20
   6  -2  -2 1101.35   67.67
  -6   2   2 1136.30   72.71
   6   2  -2 1122.37   70.27
  -6   2   1  127.48   22.79
   6  -2  -1  100.91   22.74
   6   2  -1  182.96   26.95
   6  -2  -1  141.32   25.20
   6   2  -1  199.53   29.72
  -6   2   1  172.93   27.75
  -6  -2   1  175.23   29.91
  -6   2   0 2427.05   91.72
   6  -2   0 2359.86   95.90
   6  -2   0 2712.35  107.23
   6   2   0 2712.41  105.43
  -6   2   0 2487.83  105.22
  -6  -2   0 2538.28  106.45
  -6   2  -1  143.65   24.44
   6  -2   1  159.33   26.18
   6   2   1  142.22   26.97
   6  -2   1  164.80   26.83
   6   2   1  151.16   27.29
  -6  -2  -1  144.86   25.79
  -6   2  -2 1049.01   60.65
   6   2   2 1248.45   69.96
   6  -2   2 1310.85   73.76
   6   2   2 1301.83   74.39
   6  -2   2 1326.00   75.76
  -6  -2  -2  948.96   65.80
   6   2   3  559.65   46.73
  -6   2  -3  560.86   43.89
   6  -2   3  566.00   48.47
   6  -2   3  557.69   50.30
  -6  -2  -3  377.93   40.37
   6   2   3  583.55   49.71
  -6   2  -4  609.09   45.48
   6  -2   4  623.34   52.33
   6  -2   4  682.09   54.28
  -6  -2  -4  622.39   53.89
   6   2   4  627.48   51.19
   6   2   5 1040.09   63.21
   6  -2   5 1082.40   69.03
  -6   2  -6 1350.61   65.79
   6  -2   6 1601.01   83.96
   6   2   6 1560.16   80.46
   6  -2   7   37.98   15.29
   6   2   7  110.67   22.09
   6  -2   7   88.70   21.56
   6   2   8  459.92   44.60
   6  -2   8  487.93   50.56
   6  -2   8  605.85   53.56
   6   2   8  472.23   45.26
   6   2   9   13.08   10.18
   6  -2   9   53.33   17.87
   6   2   9   48.66   15.60
   6  -2  11   16.87   10.47
   6   2  11   11.68   11.25
  -6   3  12   -5.61   16.44
  -6   3  11  298.54   39.06
  -6  -3  11  350.38   45.82
   6  -3 -11  326.60   37.31
  -6   3  10   13.22   10.02
   6  -3 -10   18.40   13.45
   6   3  -9  204.04   23.42
  -6   3   9  228.48   30.40
   6   3  -9  241.60   23.97
  -6  -3   9  253.00   37.95
   6  -3  -9  282.64   37.97
   6   3  -8   32.28   11.20
   6   3  -8   55.18   15.28
  -6   3   8   57.10   16.86
  -6  -3   8   55.31   20.61
   6   3  -8   48.08   18.88
   6  -3  -7  668.66   39.63
   6  -3  -7  857.93   44.38
   6   3  -7  964.37   59.62
   6   3  -7  693.58   50.86
  -6  -3   7 1162.74   78.83
   6   3  -7 1089.62   74.26
   6   3  -6  111.22   22.34
   6  -3  -6  108.43   19.45
   6   3  -6  105.06   20.96
   6  -3  -6  120.96   23.81
  -6  -3   6  117.40   25.02
   6   3  -6  122.08   24.16
   6  -3  -5  756.34   51.04
   6   3  -5  821.64   57.37
   6  -3  -5  891.00   63.87
   6   3  -5 1004.88   70.04
  -6  -3   5 1025.55   71.71
   6   3  -5  977.09   62.14
  -6   3   5  989.32   61.21
   6   3  -4  279.90   36.57
   6  -3  -4  219.63   32.51
  -6   3   4  321.83   35.22
   6  -3  -4  284.39   34.77
   6   3  -4  291.12   37.94
  -6  -3   4  310.63   38.76
   6   3  -3  848.79   56.12
   6  -3  -3  923.94   61.46
  -6   3   3  844.18   57.10
   6  -3  -3  875.81   61.47
   6   3  -3  854.99   62.64
  -6  -3   3  930.84   66.79
   6   3  -2  551.53   46.49
   6  -3  -2  539.55   45.11
  -6   3   2  702.56   51.02
   6   3  -2  764.98   59.22
  -6  -3   2  713.71   57.37
   6   3  -1 1101.81   69.77
  -6   3   1 1023.77   62.16
   6  -3  -1 1210.12   73.24
  -6  -3   1 1042.38   70.89
   6   3  -1 1100.76   69.86
   6  -3   0   28.94   10.71
  -6   3   0   39.10   13.39
   6   3   0   31.47   13.07
  -6  -3   0   24.81   14.30
   6  -3   0   38.70   14.78
   6   3   0   41.34   14.00
   6   3   1 1033.39   66.22
   6  -3   1 1093.74   67.86
  -6   3  -1 1023.33   60.83
   6  -3   1 1105.87   69.25
   6   3   1  935.97   64.88
  -6  -3  -1  992.90   69.69
   6   3   2  618.47   51.87
   6  -3   2  780.00   59.10
  -6   3  -2  598.58   47.67
   6   3   2  671.04   53.72
  -6  -3  -2  702.00   57.40
   6  -3   2  672.61   54.49
  -6   3  -3  874.53   55.42
   6   3   3  833.42   58.93
   6  -3   3  692.50   52.97
   6   3   3  951.13   62.87
  -6  -3  -3  897.74   68.61
   6  -3   3  855.02   62.49
  -6   3  -4  285.65   32.10
   6   3   4  225.99   32.84
   6  -3   4  240.98   34.69
   6   3   4  266.28   35.13
   6  -3   4  289.72   37.30
   6   3   5  896.62   61.81
  -6   3  -5  852.37   55.73
   6   3   5  916.49   63.48
  -6  -3  -5  804.84   61.01
   6  -3   5  936.19   67.48
   6  -3   6  129.65   25.19
  -6   3  -6  107.13   20.20
   6  -3   6  132.63   25.58
  -6  -3  -6   54.76   17.40
   6   3   6  119.81   21.60
  -6   3  -7  817.95   50.97
   6  -3   7  839.95   63.41
   6   3   7 1043.48   66.16
   6  -3   7  979.02   68.84
   6   3   8   47.95   17.73
   6  -3   8   52.38   17.27
   6   3   8   69.22   17.74
   6   3   9  218.35   31.43
   6   3   9  230.92   34.50
   6  -3   9  242.99   35.54
   6  -3  11  232.11   35.56
   6   3  11  190.68   30.24
   6  -3  11  229.15   38.74
  -6   4  12  130.59   27.88
  -6   4  11    6.60   13.32
  -6  -4  11   -7.18   20.63
   6   4 -11  -23.27   22.89
   6  -4 -11   -8.16   17.89
   6   4 -10   95.38   12.67
  -6   4  10  186.06   29.84
   6   4 -10   92.45   11.03
  -6  -4  10  229.27   41.06
   6  -4 -10  224.58   34.33
   6   4  -9   21.29    8.58
   6   4  -9   28.61   11.25
  -6   4   9   16.77    7.56
  -6  -4   9   37.76   17.11
   6   4  -9   31.53   16.17
   6  -4  -9   34.36   16.61
   6   4  -8  342.61   35.92
   6   4  -8  261.52   33.73
  -6   4   8  380.86   38.99
  -6  -4   8  462.60   52.23
   6   4  -8  459.24   52.13
   6  -4  -7   18.44    6.49
   6   4  -7   13.93    9.38
   6  -4  -7   10.14    6.62
  -6   4   7   15.77   12.26
   6   4  -7   19.68   12.12
  -6  -4   7   19.06   13.78
   6   4  -7    5.83    8.12
   6   4  -6  466.88   43.55
   6   4  -6  541.90   48.93
  -6  -4   6  712.10   62.89
   6  -4  -6  613.51   53.31
   6   4  -6  578.27   55.29
   6   4  -5   -6.45   10.25
   6  -4  -5  -11.58   12.10
  -6  -4   5   11.37   11.04
   6   4  -5   -5.39    7.80
   6  -4  -5    3.53    6.99
   6   4  -4 1475.88   78.95
   6  -4  -4  992.68   60.98
   6   4  -4 1025.46   64.27
  -6   4   4 1619.40   78.20
   6   4  -4 1663.00   88.86
  -6  -4   4 1652.53   92.41
   6  -4  -4 1630.62   85.88
   6   4  -3   64.51   17.95
   6   4  -3   55.50   17.74
   6  -4  -3   37.59   17.00
  -6   4   3   53.21   15.23
   6  -4  -3   49.84   17.04
  -6  -4   3   67.73   18.77
   6   4  -3   44.67   14.66
   6  -4  -2 2339.00   94.99
  -6   4   2 2061.26   89.78
  -6  -4   2 2453.87  107.51
   6   4  -2 2333.42  102.59
   6  -4  -1   41.92   12.92
  -6   4   1   50.27   14.78
   6   4  -1   29.79   12.18
  -6  -4   1   34.11   13.39
   6  -4  -1   56.78   17.31
   6   4  -1   55.16   17.84
   6  -4   0  711.90   54.13
  -6   4   0  937.29   61.17
   6   4   0  784.65   55.35
   6   4   0  885.55   63.28
  -6  -4   0  796.38   62.41
   6  -4   0  924.82   65.41
  -6   4  -1   39.53   12.24
   6   4   1   41.45   15.99
   6  -4   1   39.77   12.46
  -6  -4  -1   33.81   16.83
   6  -4   1   45.83   15.75
   6   4   1   16.41    9.17
   6  -4   2 1667.63   83.46
   6   4   2 1664.94   82.16
  -6   4  -2 2068.81   89.31
   6   4   2 2264.10   98.18
  -6  -4  -2 1711.34   89.90
   6  -4   2 2157.16  100.09
   6   4   3   47.37   14.38
  -6   4  -3   53.77   15.33
  -6  -4  -3   75.49   20.13
   6  -4   3   50.94   17.87
   6   4   3   67.67   19.58
  -6   4  -4 1198.24   68.80
   6   4   4  889.13   61.10
  -6   4  -5   11.74    8.42
   6  -4   5   -1.63    9.04
  -6  -4  -5   -2.62    8.28
   6   4   5    4.40    7.95
  -6   4  -6  521.65   41.84
   6  -4   6  457.09   47.01
   6   4   6  639.00   51.16
   6  -4   6  749.12   60.15
  -6   4  -7   23.61    9.67
   6   4   7   20.64   11.52
   6  -4   7   19.68   12.50
   6   4   7   26.21   11.25
   6   4   8  241.34   33.51
   6   4   8  331.90   37.50
   6  -4   8  381.07   44.74
   6   4   9   32.38   18.75
   6  -4   9   33.23   15.88
   6   4   9   30.72   13.58
   6  -4  10  174.43   31.42
   6   4  11   -1.69   11.38
  -6   5  12   38.24   16.08
  -6   5  11  114.41   23.63
   6   5 -10   23.96    8.90
  -6   5  10   56.91   20.61
   6   5 -10   21.56   10.04
  -6  -5  10   37.45   18.10
   6  -5 -10   44.02   18.50
   6   5  -9  238.89   30.51
   6   5  -9  193.08   30.00
  -6   5   9  297.07   36.34
  -6  -5   9  382.16   48.36
   6  -5  -9  319.40   40.11
   6   5  -9  342.50   47.80
   6   5  -8   27.93   13.99
  -6   5   8   26.88   11.48
   6   5  -8    2.68   11.27
  -6  -5   8   19.15   13.81
   6  -5  -8   35.77   14.88
   6   5  -8    8.59   10.24
   6   5  -7  675.75   52.78
   6   5  -7  679.49   54.04
  -6   5   7  659.04   51.91
  -6  -5   7  699.17   65.78
   6   5  -7  793.86   68.27
   6   5  -6   87.63   19.50
   6   5  -6   54.53   17.38
  -6   5   6   66.09   16.99
  -6  -5   6   84.19   22.06
   6  -5  -6   94.44   22.58
   6  -5  -5  431.85   38.75
   6   5  -5  726.34   57.61
   6   5  -5  400.76   44.46
  -6   5   5  694.52   53.10
  -6  -5   5  706.97   62.96
   6  -5  -5  678.15   56.25
   6   5  -5  683.77   61.59
   6   5  -4   41.98   13.04
   6  -5  -4   18.14   10.99
   6   5  -4   37.29   13.72
  -6  -5   4   56.45   19.34
   6  -5  -4   34.36   13.22
   6   5  -4   31.41   14.79
   6  -5  -3  968.54   64.30
   6   5  -3 1206.22   75.21
   6  -5  -3 1220.33   75.47
  -6  -5   3 1198.25   80.67
   6   5  -3 1124.35   77.50
   6   5  -2  400.72   43.34
   6  -5  -2  344.69   37.17
  -6  -5   2  449.06   48.76
   6   5  -2  463.56   47.34
   6  -5  -2  508.69   48.89
  -6   5   2  488.77   43.86
   6   5  -2  329.92   38.37
  -6  -5   1 1267.35   80.85
   6   5  -1 1173.16   74.62
   6  -5  -1 1335.48   79.39
  -6   5   1 1201.95   69.38
   6   5  -1 1326.15   77.41
   6  -5   0  490.48   47.16
  -6  -5   0  572.94   52.78
   6   5   0  658.50   56.14
   6  -5   0  731.05   58.06
  -6   5   0  637.07   51.44
   6   5   0  581.93   55.27
   6  -5   1 1416.18   82.56
   6   5   1 1281.97   76.56
   6  -5   1 1351.39   80.95
  -6  -5  -1 1205.53   75.28
  -6   5  -1 1402.37   73.86
   6  -5   2  550.37   51.02
   6   5   2  496.18   48.27
  -6   5  -2  420.20   41.39
   6  -5   3  981.65   69.72
  -6   5  -3  932.37   61.49
   6  -5   3 1150.72   74.48
  -6  -5  -3  861.01   69.53
   6   5   3 1125.82   70.87
  -6   5  -4   19.21   10.04
   6  -5   4   20.54   10.06
  -6  -5  -4   19.43   13.90
   6  -5   4   30.80   14.60
   6   5   4   26.43   11.45
   6  -5   5  589.42   53.89
  -6   5  -5  580.99   47.85
  -6  -5  -5  592.93   56.51
   6  -5   5  662.05   60.07
   6   5   5  655.14   54.33
   6   5   6   48.97   15.12
  -6   5  -6   72.20   15.88
   6  -5   6   94.27   24.57
   6   5   6  114.36   23.05
  -6   5  -7  658.29   48.06
   6   5   7  653.51   53.51
   6  -5   7  652.26   61.51
  -6   5  -8   38.41   13.36
   6   5   8   25.12   14.03
   6  -5   8   45.58   18.80
   6   5   8   36.83   14.08
   6  -5   9  317.70   48.04
   6   5   9  312.62   37.52
   6  -5   9  312.37   42.61
   6  -5  10   43.04   17.62
   6  -5  10   36.91   21.71
   6   5  10   54.92   21.77
  -6   6  11   59.16   22.04
   6   6 -10   68.93   17.48
  -6   6  10  137.15   25.53
  -6  -6  10  197.14   39.24
   6  -6 -10  164.69   31.17
   6   6  -9   30.69   13.98
  -6   6   9   48.47   18.06
   6   6  -9   14.47   11.29
  -6  -6   9   33.20   20.52
   6  -6  -9   26.06   14.26
   6   6  -9   35.18   17.80
   6   6  -8  206.54   32.09
  -6   6   8  244.15   33.44
   6   6  -8  233.33   30.60
  -6  -6   8  299.05   46.76
   6  -6  -8  265.28   38.07
   6   6  -8  291.67   45.23
   6  -6  -7   95.29   13.04
   6  -6  -7   90.74   12.91
  -6   6   7  134.82   25.48
  -6  -6   7  155.35   32.32
   6   6  -6  748.90   57.92
  -6   6   6  728.17   55.26
   6  -6  -6  925.69   64.96
   6   6  -6  803.12   69.17
   6   6  -5  436.04   45.51
  -6   6   5  379.18   40.21
   6  -6  -5  431.91   47.16
  -6  -6   5  429.35   46.91
   6   6  -5  385.18   47.28
   6  -6  -4  486.94   45.63
   6   6  -4  614.30   54.95
  -6   6   4  598.71   50.65
   6  -6  -4  618.66   55.13
  -6  -6   4  634.51   58.10
   6   6  -4  698.01   62.38
   6   6  -3  123.09   24.97
  -6   6   3  120.57   22.35
   6   6  -3   99.69   21.36
   6  -6  -3  102.88   19.53
  -6  -6   3  102.76   23.81
   6  -6  -3  128.59   25.39
   6   6  -3  112.57   26.63
   6   6  -2  912.73   67.22
   6  -6  -2 1016.13   67.73
  -6   6   2  955.01   63.83
  -6  -6   2  781.38   69.21
   6  -6  -2 1063.71   73.77
   6   6  -2  980.14   70.67
   6   6  -1   80.13   20.04
  -6   6   1   76.09   18.77
   6  -6  -1   76.92   20.60
   6   6  -1   39.28   15.06
  -6  -6   1   59.05   19.47
   6  -6  -1   79.91   21.76
   6   6  -1   94.37   22.98
   6   6   0 1578.64   86.89
   6  -6   0 1442.61   83.78
  -6   6   0 1448.53   76.27
   6  -6   0 1675.38   90.03
   6   6   0 1619.96   89.79
   6   6   1   72.81   20.97
   6  -6   1   54.48   18.27
  -6  -6  -1   57.03   14.99
   6   6   1   93.82   22.62
   6   6   2 1004.47   68.41
   6  -6   2 1076.18   73.23
   6  -6   3   94.93   24.13
  -6  -6  -3   19.48   12.77
  -6   6  -3  102.83   21.66
   6  -6   3   72.88   22.44
   6   6   3   40.68   13.83
   6  -6   4  503.80   50.95
   6   6   4  551.63   52.35
   6   6   4  585.47   53.07
   6  -6   4  661.12   60.21
  -6  -6  -4  502.19   54.17
   6   6   5  326.44   38.93
   6  -6   5  360.31   45.14
   6   6   6  718.18   59.99
   6  -6   6  737.68   65.23
   6   6   7   91.14   23.84
  -6   6  -7  132.37   23.92
   6  -6   7  170.52   31.63
   6   6   7  155.68   27.15
   6  -6   8  187.35   36.33
  -6   6  -8  226.36   27.98
   6  -6   8  254.99   39.48
   6   6   8  235.29   33.87
  -6   6  -9   16.58   11.81
   6  -6   9   91.72   27.08
   6  -6  10  165.92   36.62
   6   6  10  126.37   24.20
   6  -6  10  166.24   38.85
  -6   7  12  134.38   28.55
  -6   7  11  613.88   57.38
  -6   7  10   17.35   12.13
   6   7 -10  -13.01   15.23
   6   7 -10   19.22   18.33
  -6   7   9  443.83   46.88
   6  -7  -9  519.56   50.73
  -6  -7   9  559.58   62.75
   6   7  -9  501.12   60.29
   6   7  -8   66.36   18.95
   6   7  -8   27.16   19.13
  -6   7   8   62.62   20.42
   6  -7  -8   67.87   22.37
  -6  -7   8   65.89   23.55
  -6   7   7  280.85   36.77
   6   7  -7  154.82   30.58
   6   7  -7  251.04   36.75
   6  -7  -7  155.37   15.23
   6  -7  -7   92.18   11.45
   6   7  -7  359.58   48.98
   6   7  -6  423.96   47.00
  -6   7   6  332.40   38.79
   6  -7  -6  389.15   45.51
  -6  -7   6  420.74   52.05
   6   7  -6  402.06   50.07
   6  -7  -5  699.79   51.60
   6   7  -5  635.25   57.40
  -6   7   5  711.29   54.67
   6  -7  -5  854.01   67.03
  -6  -7   5  813.61   70.97
   6   7  -5  753.68   66.79
   6   7  -4   15.72   10.76
   6  -7  -4   21.16   10.43
  -6   7   4   21.28    9.12
   6   7  -4   13.35    8.84
  -6  -7   4   37.67   17.46
   6  -7  -4   25.25   12.98
   6   7  -4   14.04   13.37
   6  -7  -3  534.23   48.57
   6   7  -3  542.91   54.95
  -6   7   3  584.13   50.99
  -6  -7   3  606.20   58.55
   6  -7  -3  629.79   58.84
   6   7  -3  579.62   57.12
   6   7  -2   52.06   17.92
  -6   7   2   76.24   18.43
   6  -7  -2   50.12   18.94
   6   7  -2   68.09   20.76
  -6  -7   2   61.36   19.54
   6  -7  -2   92.21   21.92
   6   7  -2   61.02   20.28
   6   7  -1  894.88   67.89
  -6   7   1  923.65   62.30
  -6  -7   1  774.34   62.77
   6  -7  -1  889.12   68.63
   6   7  -1  861.07   68.14
   6   7   0  239.03   36.30
  -6   7   0  229.55   31.52
   6   7   0  187.87   36.86
   6  -7   0  143.87   26.38
  -6  -7   0  206.61   34.65
   6  -7   0  248.13   37.82
   6   7   0  237.86   35.69
   6  -7   1  939.38   69.88
   6   7   1  912.79   67.36
  -6   7  -1  792.36   58.24
   6  -7   1  908.75   71.69
   6   7   1  845.05   65.48
  -6   7  -2   56.28   17.37
   6   7   2   21.63    9.16
   6  -7   2   37.31   16.10
   6  -7   2   48.14   17.75
  -6  -7  -2   22.08   12.56
   6  -7   3  611.82   59.28
   6   7   3  278.83   35.07
  -6   7  -3  593.18   50.89
   6  -7   3  617.79   59.97
  -6  -7  -3  215.73   37.18
   6   7   3  566.72   54.74
   6   7   4   25.54   13.47
  -6   7  -4   25.56   11.26
   6   7   4   30.96   13.24
   6   7   5  615.34   58.19
  -6   7  -5  614.46   52.36
   6  -7   5  780.85   68.64
   6   7   5  681.90   57.19
  -6   7  -6  376.28   40.45
   6  -7   6  405.12   49.68
   6   7   6  332.99   40.66
   6  -7   7  282.29   43.20
  -6   7  -7  249.14   34.11
   6  -7   7  266.52   43.32
   6   7   7  248.77   35.07
   6  -7   8   82.13   25.84
   6  -7   8   28.59   20.67
  -6   7  -9  435.30   40.02
   6  -7   9  486.28   56.15
   6  -7   9  441.28   56.54
   6   7   9  407.20   44.10
  -6   8  10  765.13   66.91
   6   8  -9   49.35   16.77
   6   8  -9   21.82   15.24
  -6   8   9   31.58   12.85
   6  -8  -9   -0.95   16.47
   6   8  -8  266.67   37.75
  -6   8   8  289.58   39.49
   6  -8  -8  317.62   45.08
  -6  -8   8  336.20   49.04
   6   8  -8  342.38   51.37
   6   8  -7    4.50   12.36
  -6   8   7    9.47   11.71
  -6  -8   7   19.40   16.60
   6   8  -7   28.22   18.25
   6   8  -6  131.87   28.67
  -6   8   6  179.06   30.62
   6  -8  -6  143.05   31.27
  -6  -8   6  216.43   40.91
   6   8  -6  193.25   37.58
   6  -8  -5   39.40   15.36
   6   8  -5   60.67   19.65
  -6   8   5   63.96   18.45
  -6  -8   5   84.04   28.33
   6  -8  -5   76.98   22.89
   6   8  -5   73.36   20.13
   6  -8  -4  640.69   55.22
   6   8  -4  853.31   68.50
  -6   8   4  864.72   64.35
  -6  -8   4  899.19   77.62
   6  -8  -4  903.14   72.32
   6   8  -4  858.52   73.80
   6   8  -3   56.78   17.48
   6  -8  -3   39.58   18.16
  -6   8   3   43.42   14.73
   6  -8  -3   67.47   22.04
  -6  -8   3   68.04   21.38
   6   8  -3   47.39   16.17
   6   8  -2  522.71   58.00
  -6   8   2  557.00   49.72
  -6  -8   2  466.14   53.24
   6  -8  -2  590.19   56.78
   6   8  -2  599.59   61.02
   6   8  -1   94.55   23.32
   6  -8  -1   44.47   10.86
  -6   8   1   77.71   21.59
   6  -8  -1  107.13   25.77
  -6  -8   1   89.61   25.19
   6   8  -1   92.51   23.11
   6   8   0  563.98   55.70
  -6   8   0  596.25   52.97
   6  -8   0  594.91   59.58
   6   8   0  554.40   55.72
   6   8   1  124.97   25.97
   6  -8   1   42.86   17.24
  -6   8  -1  137.19   26.29
   6  -8   1  108.19   27.07
  -6  -8  -1   45.24   20.50
   6   8   1  123.04   27.17
   6   8   2  547.75   53.02
  -6   8  -2  473.11   47.36
   6  -8   2  674.51   64.11
   6   8   2  567.58   56.19
   6   8   3   46.04   16.79
  -6   8  -3   52.42   16.31
   6  -8   3   33.71   17.57
   6   8   3   49.90   19.90
   6   8   4  955.37   69.50
  -6   8  -4  885.92   64.44
   6  -8   4  925.24   76.50
   6   8   4  860.88   67.61
   6  -8   5   88.85   25.89
  -6   8  -5   61.70   17.73
   6  -8   5   70.69   24.49
   6   8   5   65.03   17.22
  -6   8  -6  141.02   27.11
   6  -8   6  178.62   34.79
   6   8   6  182.39   31.39
   6  -8   6  126.45   34.12
  -6   8  -7   21.29   10.07
   6  -8   7   33.96   17.28
   6  -8   7   37.17   22.60
   6   8   7    6.61   11.79
  -6   8  -8  262.30   35.04
   6   8   8  293.70   38.00
  -6   8  -9   25.07   14.26
   6  -8   9   39.42   19.09
   6   8   9   41.06   15.42
   6  -8   9   51.23   27.61
  -6   8 -10  560.73   43.99
  -6   9  10   83.96   22.15
   6   9 -10   55.45   20.60
   6   9  -9  832.01   66.38
   6   9  -9  269.34   56.67
   6   9  -8   80.64   24.61
  -6   9   8  104.85   25.50
   6  -9  -8    4.30   15.97
  -6  -9   8   97.97   33.77
   6   9  -8  115.26   35.62
   6   9  -7  594.19   59.30
  -6   9   7  496.83   50.19
  -6  -9   7  408.61   61.04
   6   9  -7  497.11   63.96
   6   9  -6  131.60   29.31
  -6   9   6  164.51   28.66
   6  -9  -6  150.56   30.57
  -6  -9   6   74.54   27.63
   6   9  -6  160.44   38.37
   6  -9  -5  173.89   26.84
   6   9  -5  240.51   39.77
  -6   9   5  252.62   38.40
  -6  -9   5  193.36   40.78
   6  -9  -5  262.37   40.18
   6   9  -5  285.97   44.95
   6   9  -4   24.62   15.02
   6  -9  -4   -9.97   13.83
  -6   9   4   -4.83   11.57
   6  -9  -4   -5.91   11.50
  -6  -9   4   -7.35   17.11
   6   9  -4   16.23   15.98
   6   9  -3  608.52   60.36
  -6   9   3  633.28   59.02
  -6  -9   3  535.20   58.42
   6   9  -3  579.30   63.99
   6   9  -2   62.77   22.58
   6  -9  -2   -4.10   12.97
  -6   9   2   37.83   18.09
   6  -9  -2   34.88   15.45
   6   9  -2   48.43   19.51
   6   9  -1  372.33   46.81
   6  -9  -1  358.22   47.49
  -6   9   1  410.89   45.24
  -6  -9   1  421.95   53.77
   6  -9  -1  423.04   51.19
   6   9   0   13.99   11.35
  -6   9   0   11.49    7.72
   6  -9   0   29.46   17.01
  -6  -9   0   13.50   11.31
   6   9   0   23.79   15.38
   6   9   1  391.50   48.33
  -6   9  -1  338.73   41.42
   6  -9   1  395.32   50.57
   6   9   1  345.24   45.74
   6  -9   2    7.35   13.81
   6   9   2   33.61   16.04
  -6   9  -2   55.25   18.67
   6  -9   2   44.55   21.51
   6   9   2    3.03    7.90
  -6   9  -3  575.34   52.59
   6  -9   3  664.61   71.57
   6   9   3  716.23   61.63
   6   9   3  532.93   56.18
   6   9   4   14.32   11.89
  -6   9  -4    7.18    9.86
   6  -9   4   -3.88   14.76
   6  -9   4    9.54   12.85
   6   9   4    8.91   10.44
   6   9   5  248.20   36.53
  -6   9  -5  266.83   37.86
   6  -9   5  259.72   42.58
   6  -9   5  221.69   41.41
   6   9   5  274.02   39.22
   6   9   6  104.62   27.34
  -6   9  -6  123.37   25.87
   6  -9   6   76.68   24.73
   6   9   6   88.02   25.10
   6  -9   6   77.89   24.61
   6   9   7  522.72   53.37
  -6   9  -7  423.84   45.67
   6  -9   7  502.23   60.55
   6   9   7  402.56   47.13
   6  -9   7  517.77   67.99
   6   9   8  119.66   28.56
  -6   9  -8  109.00   25.32
   6  -9   8   99.96   28.73
   6   9   8   91.61   25.69
   6  -9   8  139.24   38.57
  -6   9  -9  840.68   60.80
   6   9   9  941.51   72.95
   6   9  11   99.67   25.57
  -6  10   9   17.48   13.67
   6  10  -9   10.46   15.58
   6  10  -8  461.03   59.88
   6  10  -8  584.29   73.77
   6  10  -7  -16.60   17.44
  -6  10   7   24.58   12.98
  -6 -10   7   -1.37   20.99
   6  10  -7    5.42   22.49
   6  10  -6  569.84   59.39
  -6  10   6  540.52   55.20
   6 -10  -6  563.12   63.34
  -6 -10   6  478.60   66.96
   6  10  -6  580.73   69.56
   6  10  -5  110.12   30.73
   6 -10  -5   72.32   18.62
  -6  10   5  192.05   33.07
   6 -10  -5  188.43   33.40
   6  10  -5  103.17   30.47
   6 -10  -4  157.94   31.52
   6  10  -4  163.19   33.13
  -6  10   4  154.93   27.63
   6 -10  -4  109.63   27.90
   6  10  -4  163.84   36.42
   6  10  -3   82.92   24.54
   6 -10  -3   26.50   13.64
  -6  10   3  102.65   24.31
  -6 -10   3   41.16   21.90
   6 -10  -3   88.65   24.83
   6  10  -2  595.49   62.12
   6 -10  -2  232.29   37.40
  -6  10   2  697.21   61.30
  -6 -10   2  335.18   49.98
   6 -10  -2  631.01   66.10
   6  10  -2  686.96   71.25
   6  10  -1    5.43   11.19
  -6  10   1   14.92   11.45
   6 -10  -1   -9.25   13.10
  -6 -10   1   -4.85   19.93
   6  10  -1   25.58   13.01
   6  10   0  356.96   46.52
  -6  10   0  355.67   44.94
   6 -10   0  378.46   50.38
   6  10   0  301.18   44.49
   6  10   1   14.87   13.45
  -6  10  -1   31.73   17.32
   6 -10   1    2.38   11.47
   6 -10   1   14.00   19.83
   6  10   1   11.23    8.56
   6  10   2  542.04   58.48
  -6  10  -2  573.10   55.65
   6 -10   2  607.62   65.33
   6 -10   2  464.30   56.84
   6  10   2  605.22   61.09
   6  10   3   96.48   26.11
  -6  10  -3  120.28   27.18
   6 -10   3  120.65   31.86
   6  10   3  102.28   25.62
   6  10   4  208.32   34.54
  -6  10  -4  198.41   32.26
   6 -10   4  209.45   39.32
   6  10   4  158.50   34.10
   6  10   5  170.79   33.10
  -6  10  -5  164.60   31.58
   6 -10   5  159.49   36.38
   6 -10   5  111.82   33.61
   6  10   5  128.08   25.98
   6  10   6  558.90   60.12
  -6  10  -6  489.98   51.16
   6 -10   6  576.50   66.16
   6 -10   6  430.72   62.12
   6  10   6  426.25   50.75
  -6  10  -7   -5.23   14.58
   6  10   7   -3.10   11.66
   6 -10   7   -9.72   21.54
   6  10   7   21.22   17.41
  -6  10  -8  460.57   50.34
  -6  10  -9   21.61   12.89
   6  10   9   13.89   15.72
   6  11  -9   85.05   27.36
  -6  11   8   23.52   16.30
   6  11  -8   24.73   22.22
  -6  11   7  664.54   64.56
   6  11  -7  584.59   64.56
   6  11  -7  597.77   73.85
   6 -11  -6   -3.54   11.30
  -6  11   6   -4.05   16.02
  -6 -11   6   17.97   22.03
   6 -11  -6  -18.86   20.96
   6  11  -6   -0.18   22.50
   6 -11  -5  390.58   39.73
  -6 -11   5  349.14   62.55
   6 -11  -5  442.20   57.48
   6 -11  -4   11.60   13.91
   6  11  -4   62.47   26.34
   6 -11  -3  457.97   53.40
   6  11  -3  437.95   55.08
  -6  11   3  397.60   49.38
   6 -11  -3  399.18   53.00
   6  11  -3  350.89   53.10
   6  11  -2   47.74   19.46
  -6  11   2   58.08   23.80
   6 -11  -2   24.55   15.59
   6  11  -2   43.40   19.20
   6  11  -1  340.60   49.71
  -6  11   1  379.07   48.73
   6 -11  -1  470.81   58.67
   6  11  -1  344.39   50.53
   6  11   0   21.87   12.71
  -6  11   0   43.79   19.68
   6 -11   0   47.14   21.05
   6  11   0   29.30   18.96
   6  11   1  336.40   49.91
  -6  11  -1  326.83   43.41
   6 -11   1  331.23   50.19
   6  11   1  336.83   49.73
   6  11   2   18.63   14.42
  -6  11  -2   42.58   15.98
   6 -11   2   74.82   23.00
   6  11   2   25.42   17.22
   6  11   3  324.75   49.41
  -6  11  -3  338.84   43.57
   6  11   3  378.82   53.10
   6  11   4   35.08   19.32
   6 -11   4   49.03   21.99
   6 -11   4   52.98   25.70
   6 -11   5  521.23   66.13
   6 -11   5  500.36   67.06
   6  11   5  444.44   54.82
   6  11   6  -14.44   17.38
   6  11   7  528.09   65.71
   6 -11   7  637.59   78.14
   6  11   8    9.96   19.47
   6  12  -7   14.58   23.01
   6  12  -6  451.53   69.46
   6  12  -5   -9.06   16.18
   6 -12  -5   14.15   14.35
  -6  12   5   42.68   20.18
   6 -12  -5   -2.75   16.80
   6  12  -5  -10.31   17.05
   6  12  -4  402.20   57.53
  -6  12   4  553.08   58.06
   6 -12  -4  510.08   65.56
   6  12  -4  554.49   70.14
   6  12  -3   34.11   16.72
  -6  12   3   35.79   18.18
   6 -12  -3   55.94   25.79
   6  12  -3    7.19   17.59
   6  12  -2  286.15   48.98
  -6  12   2  268.87   42.43
   6 -12  -2  225.27   47.49
   6  12  -2  325.97   55.18
   6  12  -1   20.07   21.08
  -6  12   1   56.47   22.25
   6 -12  -1   69.54   24.75
   6  12  -1   69.31   27.90
   6  12   0  707.96   73.69
  -6  12   0  739.40   70.30
   6 -12   0  732.83   75.92
   6  12   0  628.74   72.75
  -6  12  -1   73.49   24.54
   6  12   1   75.92   25.63
   6  12   1   43.79   20.84
   6  12   2  276.99   44.91
  -6  12  -2  255.29   39.36
   6 -12   2  336.16   52.05
   6  12   3   40.92   12.82
  -6  12  -3   66.02   22.05
   6 -12   3   48.36   23.29
   6  12   3   27.61   21.62
   6  12   4  489.63   61.17
  -6  12  -4  479.37   58.32
   6 -12   4  561.23   68.52
   6  12   4  425.97   57.84
   6  12   5    4.64   13.38
  -6  12  -5  -10.19   13.52
   6  12   6  345.21   55.45
  -6  12  -6  442.71   55.84
   6 -12   6  490.33   68.57
  -6  12  -7  -14.46   20.38
  -6  12  -9   -4.56   19.34
   6  13  -6    5.05   26.66
   6  13  -5  233.95   55.09
   6  13  -4   42.29   26.22
   6 -13  -3  300.03   54.97
   6  13  -3  323.21   56.24
   6 -13  -2   82.18   31.03
   6  13  -2   64.09   27.03
   6 -13  -1  467.89   64.35
   6  13  -1  511.24   69.42
   6 -13   0   27.66   18.90
   6 -13   1  587.68   71.42
   6  13   1  535.63   67.26
   6 -13   2   43.99   21.70
   6  13   2   59.62   25.43
   6 -13   3  310.65   56.49
   6 -13   4   37.34   24.83
   6 -13   5  340.45   59.84
   6 -14  -2  565.56   73.55
   6  14  -2  429.51   71.40
   6 -14  -1  -10.05   20.73
   6  14  -1    4.41   25.18
   6 -14   0  345.27   59.19
   6 -14   1  -11.67   23.02
   6 -14   2  562.77   76.98
   6 -14   3   25.40   29.20
   6 -14   4  157.06   45.94
   6 -15   1  276.83   61.05
   6 -15   3  265.06   60.91
  -7   0  10  -11.25   20.95
   7   0 -10  -25.78   23.35
   7   0  -9  228.98   16.52
   7   0  -9  210.78   16.56
   7   0  -8  -11.72   11.16
   7   0  -8  -10.47    8.55
  -7   0   8  -21.68   14.53
   7   0  -8   -5.59   12.60
   7   0  -7  719.85   50.28
   7   0  -7  635.79   50.44
  -7   0   7  790.18   61.83
   7   0  -7  811.83   68.65
   7   0  -6   -7.06   10.20
  -7   0   6    9.10    9.64
   7   0  -6   -6.84   11.75
  -7   0   6    0.79   10.03
   7   0  -6    7.95   10.28
   7   0  -5  264.59   35.23
  -7   0   5  327.47   40.34
   7   0  -5  263.14   36.22
  -7   0   5  358.29   46.06
   7   0  -5  312.43   40.79
   7   0  -4   -4.56    8.16
  -7   0   4   -2.78    6.76
  -7   0   4   -5.17    8.57
   7   0  -4   12.22   11.61
  -7   0   3  386.32   41.97
   7   0  -3  411.28   46.61
   7   0  -3  302.18   43.09
  -7   0   3  390.18   47.70
  -7   0   2  -11.86    7.86
   7   0  -2  -10.88   11.15
  -7   0   2    4.46    9.60
  -7   0   1 1445.66   79.84
  -7   0   1 1499.68   89.90
   7   0  -1 1318.63   81.36
   7   0   0   14.58   15.07
  -7   0   0   -1.14    6.43
   7   0   0    9.06   10.85
  -7   0   0    9.64    9.41
  -7   0  -1 1417.57   88.90
   7   0   1 1421.23   84.22
   7   0   2   -2.03    8.59
   7   0   2   -0.99    5.86
  -7   0  -2   -9.71    8.82
   7   0   3  270.97   36.79
   7   0   3  469.06   48.80
   7   0   4   -8.80   11.12
   7   0   4   -3.63    7.69
   7   0   5  308.22   40.70
   7   0   6   -2.95    7.04
   7   0   7  814.37   65.82
   7   0   8    2.63    9.33
   7   0   9  542.50   54.42
  -7   1  10  658.86   67.44
   7  -1 -10  -25.14   21.44
   7   1  -9    1.15    7.65
   7   1  -9   -6.86    7.58
  -7   1   9    4.11   11.36
  -7  -1   9   14.14   13.28
  -7   1   9    2.94   17.26
   7   1  -8  311.75   33.82
   7  -1  -8  443.27   34.82
   7   1  -8  478.58   40.03
  -7   1   8  697.49   61.38
   7  -1  -8  725.72   65.99
  -7   1   8  715.25   67.91
  -7  -1   8  776.95   68.02
   7   1  -8  714.44   63.72
   7  -1  -7  133.31   21.80
   7   1  -7  134.21   24.78
   7   1  -7   87.06   22.20
  -7   1   7  144.06   29.24
   7  -1  -7   65.88   15.20
  -7  -1   7  122.38   28.11
  -7   1   7  160.08   31.10
   7  -1  -7  144.60   28.14
   7   1  -7  128.41   29.42
   7  -1  -6  415.53   41.33
   7   1  -6  392.72   42.14
   7  -1  -6  432.00   42.60
   7   1  -6  363.25   41.89
  -7   1   6  444.18   46.43
  -7   1   6  513.19   55.36
  -7  -1   6  526.21   57.40
   7  -1  -6  454.72   49.47
   7   1  -6  458.71   52.93
   7   1  -5   50.69   16.25
  -7   1   5   66.08   20.00
   7   1  -5   31.55   14.74
   7  -1  -5   26.04   13.32
  -7  -1   5   63.88   20.45
  -7   1   5   62.97   20.20
   7  -1  -5   63.22   22.51
   7  -1  -4  264.27   35.00
  -7   1   4  381.53   43.38
   7  -1  -4  337.94   44.88
  -7   1   4  444.03   50.39
   7   1  -4  302.35   42.02
   7  -1  -3  105.85   21.46
  -7   1   3  157.97   26.84
   7  -1  -3  141.61   28.66
  -7  -1   3  131.86   29.65
   7   1  -3  173.65   31.38
  -7   1   2  586.38   49.67
   7   1  -2  566.33   53.94
  -7   1   2  657.91   58.13
  -7  -1   2  665.24   63.01
   7  -1  -2  582.26   54.68
   7   1  -1  141.82   25.98
  -7   1   1  170.89   29.27
  -7  -1   1  157.78   28.65
   7  -1  -1  142.34   27.82
  -7   1   1  164.06   31.78
   7   1  -1  185.31   30.65
   7   1   0  214.75   31.55
   7  -1   0  308.16   41.86
  -7   1   0  310.69   36.99
   7   1   0  372.17   44.10
  -7   1   0  324.18   42.46
   7  -1   0  310.15   40.92
  -7  -1   0  286.16   39.90
   7  -1   1  101.55   23.73
   7   1   1  141.51   27.13
  -7   1  -1  141.51   27.00
   7   1   1  191.31   30.55
  -7   1  -1  142.88   27.29
   7  -1   1  168.33   30.00
  -7  -1  -1  134.74   28.78
   7   1   2  380.71   44.57
   7  -1   2  546.00   51.95
  -7  -1  -2  389.92   48.86
   7   1   2  516.39   52.43
   7  -1   3   46.46   14.89
   7   1   3   75.08   19.71
   7   1   4  343.62   42.17
   7  -1   4  364.44   42.92
   7   1   4  352.66   42.84
   7  -1   5   59.16   18.51
   7   1   5   56.72   16.63
   7  -1   6  482.25   50.11
   7   1   6  459.54   48.75
   7  -1   7  108.93   24.84
   7   1   7  138.78   29.36
   7  -1   8  562.73   54.92
   7   1   8  603.58   56.98
   7   1   9   13.76   11.73
   7  -1   9   12.58   12.14
  -7   2  10   33.39   16.05
  -7   2   9  530.26   53.83
  -7  -2   9  598.49   62.97
   7   2  -9  539.55   61.59
   7  -2  -8  271.69   24.55
   7  -2  -8  148.86   19.30
   7   2  -8  301.29   32.41
  -7   2   8  287.92   38.27
   7   2  -8  142.45   26.06
  -7   2   8  399.87   49.79
  -7  -2   8  351.45   48.87
   7   2  -8  336.75   47.07
   7  -2  -7  259.36   31.37
   7   2  -7  106.52   21.00
   7  -2  -7  189.50   27.11
  -7   2   7  226.99   33.72
   7   2  -7  296.86   35.97
  -7  -2   7  309.51   45.63
  -7   2   7  226.35   39.33
   7   2  -7  262.45   42.40
   7  -2  -7  203.57   36.47
   7  -2  -6   98.06   21.04
   7   2  -6   71.92   19.49
  -7   2   6   90.95   21.30
   7  -2  -6   63.73   15.08
  -7  -2   6  101.24   25.08
  -7   2   6  107.09   25.50
   7  -2  -6   75.35   23.17
   7   2  -6   81.02   23.33
  -7   2   5  560.99   52.33
   7  -2  -5  632.22   60.48
   7   2  -5  579.72   56.99
  -7   2   5  682.79   64.59
  -7  -2   5  623.67   60.36
   7   2  -4   18.47   12.44
  -7   2   4   34.27   12.31
   7  -2  -4   27.18   15.89
  -7  -2   4   27.68   12.88
  -7   2   4   45.90   17.82
   7   2  -4   46.09   18.40
   7   2  -3  473.92   48.73
  -7   2   3  750.85   58.31
   7  -2  -3  585.40   52.05
   7   2  -3  828.35   66.62
  -7  -2   3  776.91   67.86
   7  -2  -3  881.69   68.64
  -7   2   2   31.49   12.83
   7   2  -2   33.60   16.85
   7  -2  -2   31.75   12.80
  -7  -2   2   24.74   15.90
  -7   2   2   53.22   18.67
   7   2  -2   33.08   13.71
   7   2  -1  757.21   61.23
  -7   2   1  711.59   56.84
   7  -2  -1  630.57   55.93
  -7   2   1  818.15   66.97
   7  -2  -1  671.86   59.81
   7   2  -1  747.35   62.15
  -7  -2   1  637.14   59.49
   7   2   0  307.19   39.15
  -7   2   0  263.60   35.59
   7  -2   0  266.17   36.23
   7  -2   0  335.59   40.64
   7   2   0  353.55   42.99
  -7  -2   0  311.13   42.43
   7   2   1  434.55   43.63
  -7   2  -1  811.43   59.07
   7  -2   1  458.33   47.30
   7   2   1  785.24   64.05
   7  -2   1  894.28   66.35
  -7  -2  -1  566.20   55.11
   7   2   2    8.42   12.01
   7  -2   2   19.98   12.96
  -7   2  -2   26.50   12.90
  -7  -2  -2   15.35   13.14
   7  -2   2   38.62   16.51
   7   2   2   33.16   13.60
   7   2   3  415.29   43.68
   7  -2   3  452.58   48.24
   7   2   4   25.46   11.21
   7   2   4   21.77   10.94
   7  -2   4   53.56   16.43
  -7  -2  -4   33.21   14.70
  -7   2  -5  527.06   45.10
   7   2   5  566.23   53.35
   7  -2   5  608.42   57.43
   7   2   6   73.75   20.66
   7  -2   6   72.46   20.62
   7   2   7  284.98   39.27
   7  -2   7  328.31   43.85
   7   2   8  300.09   40.13
   7  -2   8  349.35   43.76
   7  -2   9  528.75   53.43
   7   2   9  464.75   48.83
  -7   3  11   15.07   15.92
  -7   3  10  145.51   29.54
   7   3  -9   82.92   18.14
  -7   3   9  118.75   26.25
   7   3  -9   30.70    9.93
  -7  -3   9  127.50   32.93
   7   3  -9  156.79   33.89
   7  -3  -9  121.29   27.63
   7  -3  -8  348.89   25.44
   7   3  -8  449.87   42.37
  -7   3   8  484.88   48.30
   7   3  -8  406.15   42.63
  -7  -3   8  590.79   64.16
   7   3  -8  555.81   60.33
   7  -3  -7   18.61    8.78
  -7   3   7   34.35   12.47
   7   3  -7   -8.79   14.22
   7  -3  -7   27.81   10.64
  -7  -3   7   64.96   21.59
   7   3  -7   36.18   17.02
   7  -3  -7   12.79    9.80
   7   3  -6  439.57   47.75
  -7   3   6  463.33   46.81
   7  -3  -6  523.56   56.57
  -7  -3   6  501.50   58.59
   7   3  -5   18.92   11.96
  -7   3   5   25.90   10.84
   7   3  -5   -0.22   12.60
   7  -3  -5   19.06   12.10
   7  -3  -5   17.33   14.41
   7   3  -5   21.46   13.93
   7   3  -4  696.82   58.31
   7  -3  -4  547.64   55.32
   7   3  -4  554.61   52.96
  -7   3   4  619.90   53.06
   7   3  -4  608.84   58.07
  -7  -3   4  658.38   65.27
  -7   3   3   43.10   14.93
   7   3  -3   45.79   18.17
  -7  -3   3   62.33   20.56
   7  -3  -3   53.07   19.54
   7   3  -3   91.44   23.58
  -7   3   2  946.19   63.85
   7   3  -2  856.21   67.51
   7  -3  -2  926.36   70.26
  -7  -3   2  948.37   79.73
   7   3  -1   11.49   11.07
  -7   3   1   17.82   10.28
   7  -3  -1    1.53   12.41
  -7  -3   1   24.96   17.43
   7  -3  -1   19.12   11.91
   7   3  -1   35.86   17.47
  -7   3   0  576.15   49.00
   7   3   0  392.06   45.16
   7  -3   0  532.76   55.46
   7  -3   0  606.50   57.19
  -7  -3   0  514.57   54.37
   7   3   0  511.51   51.10
   7  -3   1   14.88   12.98
  -7   3  -1   19.44   11.68
   7   3   1   11.10    8.58
   7  -3   1   15.85    6.63
  -7  -3  -1   21.09   16.52
   7   3   1   24.82   13.97
  -7   3  -2  896.64   61.65
   7   3   2  328.22   41.08
   7  -3   2  395.92   44.82
   7  -3   2  973.55   71.98
   7   3   2  912.70   68.97
   7   3   3    0.61   11.66
  -7   3  -3   28.15   13.58
   7  -3   3   38.99   17.08
  -7  -3  -3   14.87   12.28
   7   3   3   28.57   12.25
  -7   3  -4  536.58   48.15
   7  -3   4  667.27   61.97
   7   3   4  628.34   57.90
   7  -3   5   25.18   10.76
   7   3   5   29.42   12.78
   7  -3   6  463.36   51.76
   7   3   6  395.63   47.59
   7  -3   7   49.56   18.08
   7   3   7   39.68   15.53
   7  -3   8  467.13   52.44
   7  -3   9  160.66   33.93
   7   3   9  124.96   27.29
  -7   4  11  135.64   31.03
   7   4 -10    5.69    8.68
   7   4  -9   71.99   20.04
   7   4  -9  139.20   24.97
  -7   4   9   65.49   20.62
  -7  -4   9   83.13   32.47
   7   4  -9   11.74   17.12
   7  -4  -9   -6.72   16.89
   7  -4  -8   54.39   10.42
   7  -4  -8   30.26    8.69
  -7   4   8  111.64   23.87
   7   4  -8   89.83   23.28
  -7  -4   8  102.24   27.42
   7   4  -8   90.28   24.41
   7  -4  -7  315.56   32.11
   7  -4  -7  338.08   33.65
   7   4  -7  618.66   53.75
  -7   4   7  624.51   55.44
   7  -4  -7  635.95   61.27
  -7  -4   7  663.05   66.27
   7   4  -6   62.70   17.85
   7  -4  -6   52.53   17.10
   7   4  -6   36.04   13.13
  -7   4   6   51.83   17.61
   7  -4  -6   42.70   16.97
   7   4  -6   39.86   18.15
   7  -4  -5  313.39   38.08
   7   4  -5  568.77   52.94
   7   4  -5  324.01   39.40
  -7   4   5  574.02   51.90
   7  -4  -5  644.63   61.72
  -7  -4   5  659.36   62.76
   7   4  -5  623.68   60.31
   7   4  -4   13.80   11.45
   7   4  -4   24.00   15.03
  -7   4   4   14.77    8.57
   7  -4  -4   10.22   12.66
  -7  -4   4   -3.69   13.11
   7   4  -4   17.29   12.51
   7   4  -3  720.95   61.34
   7   4  -3  629.59   58.30
  -7   4   3  840.25   62.79
   7  -4  -3  811.26   66.29
  -7  -4   3  926.08   72.99
   7   4  -3  911.97   71.51
   7   4  -2   16.46   11.87
  -7   4   2   15.54   11.27
   7  -4  -2   24.09   14.94
   7  -4  -2    5.22    8.17
  -7  -4   2   36.22   18.71
   7   4  -2   17.67   12.19
   7  -4  -1 1088.91   74.34
  -7   4   1 1199.28   73.97
   7  -4  -1 1237.82   83.46
   7   4  -1 1116.90   78.08
  -7  -4   1 1236.14   89.88
   7   4   0   -5.01    9.57
  -7   4   0    8.83   10.77
   7  -4   0    5.31    8.60
   7  -4   0   21.38   12.68
  -7  -4   0   12.35   14.48
   7   4   0    6.59    8.94
  -7   4  -1 1246.98   73.87
   7  -4   1 1218.99   83.28
   7   4   1 1353.47   84.62
  -7   4  -2   40.84   15.77
  -7  -4  -2   25.92   19.08
   7  -4   2   29.52   12.20
  -7   4  -3  782.26   58.37
   7   4   3  862.36   67.41
  -7   4  -4    8.96    9.46
   7  -4   4   21.78   13.66
   7   4   4    6.05    7.08
  -7   4  -5  478.84   47.24
   7   4   5  552.69   53.30
   7  -4   5  609.30   58.99
  -7   4  -6   63.77   18.95
   7  -4   6   50.66   18.49
   7   4   6   63.97   19.77
   7   4   7  509.35   51.72
   7  -4   7  553.96   58.54
   7  -4   9  119.04   29.31
   7   4   9  106.47   23.35
  -7   5  11   28.10   18.10
  -7   5  10  183.18   33.84
   7   5 -10  117.84   21.62
   7  -5  -9  -11.13   19.70
   7   5  -9  -12.82   22.26
   7   5  -8  223.05   32.93
   7   5  -8  154.54   30.21
  -7   5   8  174.39   31.06
  -7  -5   8  191.74   37.92
   7   5  -8  255.83   43.93
   7   5  -7   32.51   15.11
   7  -5  -7   18.63    9.87
  -7   5   7   38.95   19.03
   7   5  -7   -4.13   16.64
   7  -5  -7   27.70   14.14
  -7  -5   7   33.69   23.51
   7   5  -7   41.99   18.89
   7  -5  -6  492.12   44.04
   7   5  -6  679.83   60.78
   7   5  -6  576.71   56.39
  -7   5   6  801.97   62.06
   7  -5  -6  922.12   71.87
  -7  -5   6  836.72   74.95
   7   5  -6  800.19   73.72
   7   5  -5  105.03   25.19
  -7   5   5   85.65   21.94
   7  -5  -5   67.48   20.16
  -7  -5   5  114.09   28.25
   7  -5  -5   53.74   20.52
   7   5  -5  131.67   29.50
   7  -5  -4  667.14   56.39
   7   5  -4  647.40   59.36
  -7   5   4  661.86   56.31
  -7  -5   4  696.95   67.35
   7   5  -4  594.33   60.80
   7   5  -3  104.42   25.09
  -7   5   3   96.48   20.27
   7  -5  -3   78.12   21.50
  -7  -5   3   93.52   27.17
   7   5  -3   93.35   24.99
   7   5  -2  817.33   66.74
  -7   5   2  733.66   58.92
   7  -5  -2  760.86   66.57
  -7  -5   2  758.24   67.83
   7   5  -2  877.98   70.49
  -7   5   1   75.30   19.30
   7  -5  -1   49.23   17.10
  -7  -5   1   55.23   20.15
   7  -5  -1   75.46   21.63
   7   5  -1   70.17   21.72
  -7   5   0 1059.22   70.30
   7  -5   0 1109.73   79.52
   7   5   0 1074.40   77.31
  -7  -5   0  936.60   81.31
  -7   5  -1   49.55   16.52
  -7  -5  -1   68.85   25.69
   7  -5   1   94.39   25.36
  -7   5  -2  930.70   65.79
   7   5   2  822.14   67.43
  -7  -5  -2  815.00   74.44
   7  -5   2  702.19   63.34
  -7   5  -3   78.71   20.27
   7   5   3   81.90   21.51
  -7   5  -4  596.29   54.47
   7   5   4  695.85   61.34
   7  -5   4  775.08   66.55
  -7   5  -5   83.44   23.84
   7  -5   5  101.23   25.48
   7   5   5   91.43   22.34
  -7   5  -6  708.47   55.45
   7   5   6  750.76   66.02
   7  -5   6  856.21   71.91
  -7   5  -7   17.66    8.97
   7  -5   7   26.64   16.25
   7   5   7   27.99   15.75
   7  -5   8  209.47   39.74
   7   5   8  177.18   31.22
   7  -5   9  151.60   33.48
  -7   6  10    6.97   15.91
   7   6  -9  192.57   33.28
   7   6  -9   -9.58   20.77
   7   6  -8   38.91   16.63
  -7   6   8   98.40   23.41
   7   6  -8   49.89   18.22
  -7  -6   8   58.00   22.52
   7   6  -8   60.66   22.26
   7  -6  -7   57.72   13.04
   7   6  -7   45.37   17.09
   7  -6  -7   37.39   11.85
  -7   6   7   83.02   22.28
   7  -6  -7   50.10   19.63
  -7  -6   7   87.24   30.67
   7   6  -7   92.01   29.10
   7  -6  -6   -9.00   13.96
   7   6  -6    5.28    9.61
  -7   6   6   -0.99    8.67
   7  -6  -6    5.40   12.83
  -7  -6   6    1.13   13.98
   7   6  -6   -6.36   14.49
   7   6  -5  717.09   63.17
  -7   6   5  671.64   57.98
  -7  -6   5  679.17   70.61
   7  -6  -5  803.88   67.32
   7   6  -5  675.04   68.09
   7   6  -4    5.46    8.80
  -7   6   4    9.51    7.13
  -7  -6   4   16.64   13.91
   7   6  -4   -4.75   13.38
   7   6  -3  733.44   63.17
  -7   6   3  685.93   56.52
  -7  -6   3  621.08   63.37
   7  -6  -3  744.61   66.51
   7   6  -3  688.39   66.26
   7   6  -2   63.04   19.73
   7  -6  -2   36.06   17.64
  -7   6   2   84.54   19.95
  -7  -6   2   86.60   23.94
   7  -6  -2   65.11   20.45
   7   6  -2   50.20   21.44
   7  -6  -1  718.69   64.31
   7   6  -1  606.43   58.51
  -7   6   1  636.76   56.21
   7  -6  -1  713.63   64.73
   7   6  -1  712.79   67.83
   7   6   0  663.07   61.71
  -7   6   0  619.21   54.22
   7  -6   0  653.89   63.23
  -7   6  -1  784.27   60.69
   7   6   1  811.24   67.83
   7  -6   1  822.05   69.98
  -7   6  -2   53.93   19.26
   7  -6   2   63.65   23.12
   7   6   2   54.98   19.16
  -7   6  -3  594.12   54.39
   7   6   3  681.83   61.01
   7  -6   3  712.78   67.02
  -7   6  -4    1.60    9.39
   7  -6   4   15.20   10.03
   7   6   4    3.39   11.58
  -7   6  -5  558.61   52.18
   7   6   5  626.73   58.73
   7  -6   5  701.71   65.74
  -7   6  -6   -9.98    9.64
   7  -6   6   -9.28   17.30
   7   6   6   -1.50   10.85
  -7   6  -7   63.61   17.13
   7  -6   7  109.23   27.77
  -7   6  -8   73.58   18.29
   7  -6   8   41.52   15.12
   7   6   8   67.40   21.37
  -7   7   9   66.80   23.16
   7   7  -9   24.17   16.50
   7   7  -8  541.66   53.38
   7   7  -8  515.43   61.71
   7   7  -7    5.27   11.47
   7  -7  -7   20.90   11.81
   7  -7  -7    9.68   10.59
  -7   7   7   22.39   12.99
  -7  -7   7   25.50   18.24
   7   7  -7   27.14   19.26
   7   7  -6  202.10   35.51
   7  -7  -6  125.05   22.14
  -7   7   6  188.95   33.02
  -7  -7   6  169.60   41.67
   7  -7  -6  225.24   38.69
   7   7  -6  187.01   40.72
   7   7  -5    6.24    9.78
   7  -7  -5    5.74   14.81
  -7   7   5    4.93   11.73
  -7  -7   5   27.43   18.02
   7  -7  -5    8.10   12.19
   7   7  -5    7.67   13.10
   7   7  -4  481.48   57.00
  -7   7   4  490.11   52.77
  -7  -7   4  477.30   61.63
   7   7  -4  525.05   59.39
   7   7  -3   19.41   15.21
   7  -7  -3   25.25   15.42
  -7   7   3   11.41   10.30
  -7  -7   3   -5.37   14.00
   7  -7  -3   19.82   16.03
   7   7  -3   33.27   18.11
   7   7  -2  531.96   56.76
  -7   7   2  531.05   50.41
   7  -7  -2  500.13   56.79
   7   7  -2  491.94   56.24
   7   7  -1   72.76   23.23
  -7   7   1   55.80   16.70
   7  -7  -1   64.25   20.11
  -7  -7   1   56.80   16.39
   7   7   0  201.31   35.86
  -7   7   0  197.09   33.05
   7  -7   0  179.64   35.98
  -7  -7   0  104.60   29.67
   7   7   0  204.41   36.58
   7   7   1   26.80   14.89
  -7   7  -1   60.01   20.31
   7  -7   1   62.90   20.49
   7   7   1   71.44   22.61
  -7   7  -2  408.25   48.69
   7   7   2  534.84   57.23
  -7   7  -3   15.07    8.93
   7  -7   3   21.41   12.38
   7   7   3   18.97   13.80
  -7   7  -4  449.05   47.91
   7  -7   4  560.54   61.22
   7   7   4  541.46   56.39
  -7   7  -5   -0.57   10.58
   7  -7   5   32.65   19.82
   7   7   5   15.31   13.87
  -7   7  -6  120.82   25.04
   7  -7   6  214.34   40.06
  -7   7  -7   13.83   15.07
   7   7   7   34.39   16.48
   7  -7   8  536.50   66.02
  -7   7  -8  356.11   41.84
  -7   7  -9   57.38   20.94
   7   8  -9  182.93   38.73
  -7   8   8  -17.04   19.56
   7   8  -8  -11.77   16.50
   7   8  -8   27.37   18.50
   7   8  -7  239.27   40.79
  -7  -8   7  388.22   58.09
   7   8  -7  373.63   54.77
   7  -8  -6  -12.35   14.26
   7   8  -6   22.87   16.30
  -7  -8   6   -2.64   19.13
   7  -8  -6  -10.95   15.48
   7   8  -6    2.74   13.75
   7   8  -5  113.09   29.08
   7  -8  -5  106.55   25.64
  -7   8   5  188.88   31.51
   7  -8  -5  145.99   36.96
  -7  -8   5  185.53   42.39
   7   8  -5  149.55   36.93
  -7   8   4   37.90   15.06
   7   8  -4   16.97   15.03
   7  -8  -4   22.93   15.00
   7   8  -4   33.08   18.03
   7   8  -3  415.86   50.40
  -7   8   3  480.16   51.15
  -7  -8   3  280.28   47.66
   7  -8  -3  409.91   54.62
   7   8  -2  130.04   31.48
  -7   8   2  131.65   27.28
  -7  -8   2  112.07   31.68
   7  -8  -2  114.25   31.86
   7   8  -2  130.80   32.58
   7   8  -1  453.94   54.17
  -7   8   1  429.77   48.65
   7  -8  -1  452.40   54.27
   7   8  -1  379.86   52.04
   7   8   0  354.66   46.75
  -7   8   0  311.71   40.51
   7  -8   0  390.63   49.28
   7   8   0  362.77   51.03
   7   8   1  333.75   45.19
  -7   8  -1  282.55   39.95
   7  -8   1  360.83   49.20
   7   8   1  407.35   52.11
   7   8   2   91.18   22.12
  -7   8  -2   86.12   24.21
   7  -8   2  103.17   28.70
   7   8   2  119.90   27.51
   7   8   3  510.59   54.48
  -7   8  -3  426.05   51.70
   7  -8   3  481.90   58.43
   7   8   3  438.66   52.66
   7   8   4   29.07   17.17
  -7   8  -4   23.13    9.77
   7  -8   4   35.57   18.43
   7   8   4   19.07   12.26
  -7   8  -5  109.78   25.75
   7  -8   5  219.83   40.58
   7  -8   6   15.90   23.56
  -7   8  -6   14.00   11.81
   7  -8   6  -16.25   18.13
   7   8   6   -1.86   11.17
  -7   8  -7  274.32   41.37
   7  -8   7  293.41   50.12
   7  -8   7  272.20   53.21
  -7   8  -8    2.53   11.97
  -7   8  -9  220.01   34.37
  -7   9   7   66.52   20.92
   7   9  -7   56.10   28.34
   7  -9  -6  193.19   26.62
  -7   9   6  301.22   45.43
   7   9  -6  239.00   45.38
   7  -9  -5   31.10   22.92
  -7  -9   5   32.87   27.41
   7   9  -5   -2.81   19.07
   7  -9  -4  208.82   35.33
  -7  -9   4  170.46   37.62
   7  -9  -3   32.00   18.86
   7   9  -3   15.43   13.69
   7   9  -2  383.35   51.35
  -7   9   2  450.94   52.08
   7  -9  -2  467.67   57.02
   7   9  -2  414.20   55.25
   7   9  -1  289.02   43.49
  -7   9   1  205.40   36.83
   7  -9  -1  238.39   41.98
   7   9  -1  245.42   42.22
   7   9   0  164.57   33.22
  -7   9   0  170.49   30.43
   7  -9   0  188.07   36.13
   7   9   0  191.32   37.93
  -7   9  -1  296.51   43.53
   7   9   1  315.21   46.28
   7   9   1  342.70   50.07
   7   9   2  395.22   53.63
  -7   9  -2  294.57   42.27
   7  -9   2  322.12   50.29
   7   9   2  371.97   52.57
   7   9   3   66.69   22.96
  -7   9  -3   51.09   19.58
   7  -9   3   38.06   15.24
   7   9   3   54.24   21.87
   7  -9   4  201.13   47.04
  -7   9  -4  257.79   40.66
   7  -9   4  265.24   45.51
  -7   9  -5   32.94   14.37
   7  -9   5   36.06   22.49
   7   9   5   30.32   16.68
  -7   9  -6  271.54   40.55
   7   9   6  364.48   48.66
   7   9   6  292.52   44.05
   7   9   7   58.90   22.71
   7  -9   7    6.73   24.22
  -7   9  -7    2.44   15.00
  -7   9  -8  170.19   29.36
   7   9   8  281.65   45.74
  -7   9  -9  -10.94   17.27
   7  10  -9  369.70   50.87
   7  10  -8   57.27   26.56
   7  10  -7  193.20   40.23
   7  10  -6    9.29   14.67
   7  10  -5  265.20   43.15
  -7  10   5  278.79   41.00
   7  10  -5  313.91   55.10
   7  10  -4    4.30   15.52
  -7  10   4   11.47   11.32
   7 -10  -4  -13.78   21.07
   7  10  -4  -13.93   20.24
   7  10  -3  363.42   51.88
  -7  10   3  288.25   42.94
   7 -10  -3  321.47   52.18
   7  10  -3  308.82   52.08
   7  10  -2   15.73   13.19
  -7  10   2    4.12   13.04
   7 -10  -2   -3.01   15.01
   7  10  -2   11.25   12.85
   7  10  -1  268.99   47.11
  -7  10   1  269.88   41.12
   7 -10  -1  267.68   45.47
   7  10  -1  293.00   47.44
   7  10   0   11.37   13.33
  -7  10   0   -0.67   12.49
   7 -10   0   10.02   14.36
   7  10   0   -3.04   12.54
   7  10   1  323.03   48.48
  -7  10  -1  288.87   43.11
   7 -10   1  323.52   50.79
   7  10   1  294.83   45.72
   7  10   2   30.51   17.94
  -7  10  -2   14.13   13.62
   7 -10   2   17.98   18.33
   7  10   2   22.75   15.95
   7  10   3  328.46   50.11
  -7  10  -3  304.97   42.21
   7 -10   3  285.78   51.28
   7  10   4   29.98   19.16
  -7  10  -4    8.54   15.57
   7 -10   4   22.83   19.91
   7  10   4    9.73   13.02
   7  10   5  323.67   52.01
  -7  10  -5  304.01   46.27
  -7  10  -6   -5.00   14.73
   7 -10   6   52.03   25.29
  -7  10  -7  139.19   33.72
  -7  10  -8   50.95   21.28
   7  11  -6  268.40   54.55
   7  11  -5    9.70   20.61
   7 -11  -4  119.36   38.19
   7  11  -4  101.36   37.82
   7 -11  -3  -24.15   22.83
   7  11  -3  -15.58   20.72
   7 -11  -2  224.19   47.75
   7  11  -2  207.20   42.64
   7  11  -1   84.86   28.70
  -7  11   1   57.65   19.74
   7 -11  -1  110.02   32.78
   7  11  -1  132.19   36.30
  -7  11   0  380.07   50.60
   7  11   0  281.00   45.16
   7  11   0  443.74   64.46
   7  11   1   23.45   17.72
  -7  11  -1  116.48   28.10
   7 -11   1  133.15   37.08
   7  11   2  294.20   49.46
  -7  11  -2  215.21   37.48
   7 -11   2  295.91   52.69
   7  11   2  272.25   44.76
  -7  11  -3    1.01   16.39
   7 -11   3    3.34   17.34
   7  11   3   22.78   16.96
   7 -11   4  173.36   43.47
   7 -11   5   -1.84   27.83
   7  12  -5   98.66   34.14
   7  12  -4    1.04   27.50
   7 -12  -3  190.33   45.85
   7  12  -3  114.61   43.28
   7 -12  -2   -9.62   22.71
   7 -12  -1  677.92   76.04
   7 -12   0  -11.39   19.90
   7  12   0  -11.52   19.56
   7 -12   1  519.54   71.41
   7  12   1  504.06   64.60
   7 -12   2   42.73   29.32
   7 -12   3  131.14   37.77
   7 -12   4    2.49   27.87
   7  13  -4   81.42   42.84
   7  13  -3   72.25   39.59
   7  13  -2  373.31   64.02
   7 -13  -1  -64.34   36.25
   7 -13   0  393.18   64.23
   7 -13   1    4.04   22.78
   7 -13   2  335.49   59.96
   8   0  -9  -11.00   12.26
   8   0  -8  130.11   24.32
   8   0  -8  127.88   23.18
   8   0  -7   -3.58   13.63
  -8   0   7   17.74   18.52
   8   0  -7    7.14   15.28
   8   0  -6  381.88   43.00
   8   0  -6  282.89   40.98
   8   0  -5   -3.70    9.60
  -8   0   5    8.56   16.31
   8   0  -5   -1.02   13.44
  -8   0   4  244.22   37.49
  -8   0   4  367.35   51.05
   8   0  -4  350.87   48.22
  -8   0   3   -8.41   10.09
  -8   0   3  -20.34   20.03
   8   0  -3   -2.49    9.92
   8   0  -2  627.82   63.20
  -8   0   2  626.12   65.62
  -8   0   2  536.06   55.36
   8   0  -1   -9.18   14.78
  -8   0   1  -12.96   12.76
  -8   0   1   -9.54   13.78
   8   0   0  490.57   54.78
  -8   0  -1   14.39   15.70
   8   0   2  628.58   61.54
   8   0   3    3.84   10.78
   8   0   4  302.30   44.87
   8   0   5  -17.04   10.66
   8   0   6  481.72   54.00
   8   0   7    4.47   13.51
   8   1  -9  149.48   22.68
   8  -1  -8   55.30   20.05
   8   1  -8   45.91   23.47
   8  -1  -8   32.73   11.79
   8  -1  -8  -23.21   20.99
   8   1  -8  -21.78   21.25
   8   1  -7  280.69   37.63
   8  -1  -7  164.92   29.72
   8   1  -7  152.61   30.28
  -8   1   7  377.88   54.03
   8  -1  -7  284.02   48.93
   8  -1  -6   38.27   17.08
   8   1  -6   34.84   16.83
   8   1  -6   12.74   14.10
  -8   1   6   49.40   20.88
   8  -1  -6   -5.56   16.82
  -8  -1   6   20.65   15.98
   8   1  -6   26.16   16.90
   8   1  -5  316.04   43.60
  -8   1   5  395.55   47.33
   8  -1  -5  249.38   37.86
  -8  -1   5  357.85   51.06
  -8   1   5  402.26   54.05
   8   1  -5  378.06   50.77
   8  -1  -5  415.50   52.24
  -8   1   4   93.15   24.13
  -8  -1   4  139.93   33.41
  -8   1   4  107.37   28.76
   8  -1  -4  123.51   28.94
   8   1  -4   96.31   26.46
  -8   1   3  521.13   52.94
   8  -1  -3  531.05   59.41
  -8   1   3  455.37   58.28
  -8  -1   3  530.80   61.17
   8   1  -3  494.32   55.82
  -8   1   2   27.00   14.31
   8  -1  -2   26.96   16.21
  -8   1   2   13.68   13.00
  -8  -1   2   -3.44   14.67
   8   1  -2    8.09   10.02
   8   1  -1  399.75   49.48
  -8   1   1  325.29   49.83
  -8  -1   1  368.37   51.11
   8  -1  -1  293.54   45.48
  -8   1   1  415.47   46.66
   8  -1   0   62.42   20.12
   8   1   0   87.83   24.36
  -8   1   0  108.00   26.27
   8   1   1  332.95   46.08
  -8   1  -1  299.60   39.83
   8   1   2   21.99   14.11
   8  -1   2   33.48   14.24
  -8   1  -2   22.45   15.74
   8   1   3  592.91   61.98
   8  -1   3  542.94   57.99
   8  -1   4   71.50   22.39
   8   1   4   80.87   23.02
   8   1   5  310.20   45.00
   8  -1   5  317.84   44.98
   8  -1   6   28.29   15.09
   8   1   6   79.17   21.35
   8   1   7  372.20   49.16
   8  -1   7  357.80   48.63
   8   2  -9   40.96   17.50
  -8   2   8  292.05   43.38
   8  -2  -8  129.63   19.88
   8   2  -8  214.37   30.87
   8   2  -8    8.08   18.49
   8  -2  -8   -6.87   18.05
   8   2  -7    1.93   12.12
   8   2  -7    7.50   16.38
   8  -2  -7    7.93   13.07
  -8  -2   7   63.01   23.52
   8  -2  -7  -10.76   19.64
   8   2  -7   31.89   21.83
   8   2  -6  161.13   30.92
   8  -2  -6  116.90   24.56
  -8   2   6  155.13   29.48
   8  -2  -6   81.58   23.18
  -8  -2   6  181.55   38.85
  -8   2   6  206.44   37.21
   8   2  -6  245.01   42.27
   8   2  -5   19.56   13.79
  -8   2   5   40.30   19.78
   8  -2  -5   24.16   16.54
  -8  -2   5   30.57   21.21
  -8   2   5   39.03   15.38
   8  -2  -5   40.47   23.07
   8   2  -5   39.62   19.38
   8   2  -4  416.96   48.86
  -8   2   4  383.36   47.77
   8  -2  -4  464.01   55.47
  -8   2   4  567.63   61.26
  -8  -2   4  475.89   61.91
   8   2  -4  452.89   54.94
  -8   2   3  108.87   26.47
   8  -2  -3  101.65   25.26
  -8  -2   3   83.25   26.01
   8   2  -3  114.65   27.90
  -8   2   2  386.30   46.51
  -8  -2   2  472.90   58.95
   8  -2  -2  483.34   54.48
   8   2  -2  458.07   54.10
  -8   2   1   82.06   22.50
   8  -2  -1  128.76   29.76
   8   2  -1  112.74   28.55
  -8   2   0  518.37   52.75
   8  -2   0  630.20   62.76
  -8   2  -1   93.08   24.34
  -8  -2  -1   72.68   24.31
   8   2   1  116.10   28.31
  -8   2  -2  361.03   45.50
   8   2   2  414.21   51.12
   8  -2   2  351.06   45.51
  -8   2  -3   62.08   18.31
   8  -2   3   99.09   27.23
   8   2   3  103.44   25.98
  -8   2  -4  395.57   44.66
   8   2   4  505.86   56.92
   8  -2   4  452.69   52.96
   8  -2   5   22.35   14.63
   8   2   5   28.37   16.89
   8  -2   6  136.37   29.15
   8  -2   7   25.29   15.63
   8   2   7   33.89   15.06
   8   3  -8   -8.63   22.99
  -8   3   8   53.57   22.70
   8  -3  -8   -0.19   13.93
   8   3  -8   16.98   12.26
   8   3  -7  226.86   36.43
   8  -3  -7  213.10   31.57
   8  -3  -7  161.32   25.78
  -8   3   7  244.86   39.28
  -8  -3   7  246.90   44.84
   8   3  -7  318.87   51.22
   8  -3  -7  242.95   41.39
   8   3  -6   82.87   22.07
   8  -3  -6   64.39   21.07
  -8  -3   6   76.99   29.30
   8  -3  -6   60.31   22.18
   8   3  -6   89.99   30.49
   8   3  -5  343.16   44.96
  -8   3   5  366.00   46.78
   8  -3  -5  263.54   41.22
   8  -3  -5  437.93   53.68
   8   3  -5  388.54   55.46
  -8  -3   5  388.31   58.04
   8   3  -4    6.29   11.24
  -8   3   4   16.50   15.00
   8  -3  -4   21.78   17.12
  -8  -3   4   21.55   15.37
   8   3  -4    1.86   11.63
   8   3  -3  261.02   38.59
  -8   3   3  227.39   34.83
  -8  -3   3  195.12   38.94
   8  -3  -3  274.03   41.58
   8   3  -3  259.16   43.54
  -8   3   2   22.34   13.43
   8  -3  -2   10.47   10.94
  -8  -3   2   -2.21   21.07
   8   3  -2   19.86   14.31
  -8   3   1  335.70   43.78
   8   3  -1  471.69   55.79
   8  -3  -1  417.68   52.08
  -8   3   0  132.41   28.32
  -8  -3   0  120.96   32.50
   8  -3   0  179.19   35.30
   8   3   0  192.43   34.71
  -8   3  -1  353.30   45.71
   8   3   1  375.33   48.26
  -8   3  -2    9.52   11.77
   8  -3   2  -15.01   15.05
   8   3   2    4.73   10.29
  -8   3  -3  214.42   34.26
   8  -3   3  215.97   37.62
   8   3   3  194.51   37.50
  -8   3  -4   15.25    8.71
   8  -3   4   17.74   17.06
   8   3   4    8.87    9.27
  -8   3  -5  328.45   40.67
   8   3   5  402.00   52.70
   8  -3   7  220.30   40.28
   8   3   7  184.53   36.46
   8   4  -9   10.25   14.38
  -8   4   8  192.78   34.55
   8   4  -8  199.33   31.32
   8   4  -8  -21.10   22.71
   8   4  -7    3.19   13.08
   8  -4  -7   14.49   14.06
   8  -4  -7    4.98   13.19
  -8   4   7   23.44   18.98
  -8  -4   7   -4.08   22.85
   8   4  -7   30.55   23.31
   8  -4  -7   -8.92   18.88
   8   4  -6  341.39   48.97
   8  -4  -6  363.95   55.15
  -8  -4   6  209.71   50.61
   8   4  -6  338.63   51.39
   8   4  -5   36.52   17.23
   8  -4  -5   15.54   16.37
   8  -4  -5   40.10   21.23
  -8  -4   5   12.10   21.45
   8   4  -5   36.42   17.04
   8   4  -4  276.51   41.00
  -8   4   4  208.17   33.01
   8  -4  -4  250.67   42.71
  -8  -4   4  160.81   47.36
   8   4  -4  235.97   41.05
   8   4  -3   41.77   18.68
  -8   4   3   27.45   14.51
   8  -4  -3   25.24   14.86
  -8  -4   3   72.71   27.70
   8   4  -3   39.62   19.58
   8   4  -2  379.54   48.33
  -8   4   2  373.15   44.80
   8  -4  -2  336.42   48.32
   8   4  -2  414.87   51.24
  -8   4   1   -9.82   12.50
  -8  -4   1  -18.81   20.75
   8  -4  -1   -6.38   16.14
  -8   4   0  398.48   46.17
   8  -4   0  473.30   55.85
   8   4   0  440.41   53.02
  -8   4  -1   37.43   14.54
   8   4   1  -11.77   14.17
  -8   4  -2  319.48   41.74
   8  -4   2  487.36   56.27
   8   4   2  461.11   52.80
  -8   4  -3    8.94   10.14
   8  -4   3   28.61   15.50
   8   4   3   35.18   17.31
  -8   4  -4  189.36   32.89
   8  -4   4  169.31   36.90
   8   4   4  186.92   34.86
  -8   4  -5   29.70   14.33
   8  -4   5   11.06   15.18
   8   4   5   33.57   16.13
  -8   4  -6  246.78   35.05
   8   4   6  369.11   47.65
   8  -4   7   59.64   25.70
   8   4   7   38.09   16.02
   8   5  -9  173.54   32.22
   8   5  -8   13.28   16.06
   8   5  -7  414.21   48.33
  -8   5   7  415.05   49.01
   8   5  -7  493.94   63.88
   8   5  -6    8.33   14.15
  -8   5   6  -11.69   12.01
   8  -5  -6   13.54   16.35
  -8  -5   6   -9.79   24.27
   8   5  -6   43.02   23.01
   8   5  -5  207.79   36.93
   8  -5  -5  268.37   45.70
  -8  -5   5  204.49   38.13
   8   5  -5  238.73   44.48
   8   5  -4    6.75   12.40
  -8   5   4    0.26   12.01
   8  -5  -4   19.15   16.50
  -8  -5   4  -16.02   21.67
   8   5  -4   11.86   12.29
   8   5  -3  378.81   52.39
  -8   5   3  295.75   40.95
   8  -5  -3  368.54   49.18
   8   5  -3  417.75   56.39
   8   5  -2   10.24   12.00
  -8   5   2   13.03   13.47
  -8  -5   2    9.25   14.80
   8  -5  -2   -9.22   17.52
   8   5  -1  249.65   40.79
  -8   5   1  231.96   36.44
   8  -5  -1  292.79   45.87
  -8  -5   1  238.00   48.12
   8   5  -1  263.37   41.84
  -8   5   0   55.59   20.56
   8  -5   0  100.53   26.53
   8   5   0   99.83   26.49
  -8   5  -1  310.30   41.12
   8  -5   1  289.94   46.54
   8   5   1  298.48   43.56
  -8   5  -2   11.09   11.10
   8  -5   2   34.56   16.05
   8   5   2   37.72   18.53
  -8   5  -3  305.48   44.81
   8  -5   3  420.31   54.66
   8   5   3  402.43   50.68
  -8   5  -4   13.91    9.32
   8  -5   4    8.26   12.32
   8   5   4   24.82   13.62
  -8   5  -5  176.96   30.53
   8  -5   5  233.31   41.53
  -8   5  -6  -12.71   16.33
   8   5   6  -16.90   18.08
   8  -5   7  487.91   63.42
  -8   5  -7  317.60   40.80
   8   6  -9  -46.23   26.11
   8   6  -8   85.41   24.52
   8   6  -7   45.92   21.14
   8  -6  -7   26.89   13.37
   8   6  -7   42.70   26.21
   8   6  -6  376.38   49.07
  -8   6   6  323.28   44.11
  -8  -6   6  252.60   50.04
   8   6  -6  245.37   48.02
   8   6  -5   -0.14   13.55
   8  -6  -5  -24.00   20.31
  -8   6   5  -10.91   15.53
   8  -6  -5    0.71   15.86
   8   6  -5    8.94   14.13
   8   6  -4  376.97   49.85
  -8   6   4  380.99   50.96
  -8  -6   4  354.76   57.43
   8  -6  -4  343.25   50.43
   8   6  -4  356.95   54.55
   8   6  -3  167.80   35.26
   8  -6  -3  128.25   30.56
  -8  -6   3  105.49   36.39
   8   6  -2  361.48   49.68
   8  -6  -2  376.40   53.79
   8   6  -2  309.02   50.46
   8   6  -1   -1.00   12.40
  -8   6   1    6.27    8.87
   8  -6  -1   21.17   16.28
   8   6  -1   10.70   11.54
   8   6   0  414.71   50.96
  -8   6   0  418.75   49.89
   8  -6   0  511.16   61.78
   8   6   0  464.66   57.19
  -8   6  -1   14.36   14.53
   8  -6   1    3.86   12.52
   8   6   1   -6.56   15.11
  -8   6  -2  251.75   37.69
   8  -6   2  283.71   45.92
   8   6   2  274.84   43.13
  -8   6  -3  138.92   29.52
   8  -6   3  127.07   32.73
   8   6   3  121.44   29.34
  -8   6  -4  285.85   40.59
   8  -6   4  421.62   57.11
  -8   6  -5   17.91   15.05
   8  -6   5   26.41   18.65
   8   6   5   -6.20   11.99
  -8   6  -6  236.08   36.95
   8  -6   6  281.03   46.19
  -8   6  -7   60.96   21.63
  -8   6  -8  110.60   24.70
   8   7  -7  101.58   34.85
   8  -7  -6  -23.01   20.23
   8   7  -6   11.03   19.06
   8   7  -5  447.88   56.95
  -8   7   5  525.94   56.99
   8  -7  -5  507.15   62.42
  -8  -7   5  512.63   69.82
   8   7  -4   32.91   17.86
  -8   7   4   24.31   11.82
   8  -7  -4   31.68   14.30
   8   7  -4   65.45   28.93
  -8   7   3  205.71   36.13
   8  -7  -3  237.71   44.13
   8   7  -3  196.28   41.53
  -8   7   2   27.91   16.67
   8  -7  -2   12.77   15.60
   8   7  -2   11.94   16.99
   8  -7  -1  321.83   50.25
   8   7  -1  331.23   50.29
   8   7   0   -7.76   11.54
   8  -7   1  300.84   48.88
   8   7   1  307.96   46.50
   8   7   2   31.25   15.13
   8  -7   2   28.91   21.05
   8   7   2   31.17   21.68
   8  -7   3  198.57   41.92
   8  -7   4   21.09   17.86
   8   7   4   48.89   20.60
   8   7   5  591.70   65.15
   8  -7   6   21.25   19.93
  -8   7  -8   29.82   21.12
   8   8  -8   59.89   28.77
   8   8  -7   31.84   21.99
   8   8  -6  112.43   30.59
   8   8  -5   71.00   24.32
   8   8  -5   75.54   32.60
   8   8  -4  381.98   55.36
   8  -8  -4  510.26   66.23
   8   8  -4  518.42   67.11
   8   8  -3   17.97   16.82
  -8   8   3   16.39   12.91
   8  -8  -3   20.43   19.63
   8   8  -3   14.96   14.68
   8   8  -2  339.44   51.19
  -8   8   2  448.47   54.00
   8  -8  -2  541.09   66.30
   8   8  -2  369.30   56.28
   8   8  -1   34.07   16.75
  -8   8   1   15.77   14.19
   8  -8  -1   38.89   20.77
   8   8  -1   67.35   24.14
   8   8   0   50.93   19.82
  -8   8   0   34.79   16.05
   8  -8   0   64.79   23.48
   8   8   0   59.07   24.45
   8   8   1   51.46   22.99
  -8   8  -1   18.77   14.67
   8  -8   1   43.98   21.80
   8   8   1   19.57   17.88
   8   8   2  489.70   61.06
  -8   8  -2  351.43   46.59
   8  -8   2  530.94   66.57
   8   8   3   27.96   18.04
  -8   8  -3   32.06   16.09
   8  -8   3   29.05   16.84
   8   8   3   13.24   14.06
   8   8   4  364.55   51.16
  -8   8  -4  356.91   48.32
   8  -8   4  366.97   58.33
   8   8   4  365.18   52.06
  -8   8  -5   68.85   23.40
   8  -8   5  149.15   37.25
  -8   8  -6  154.54   32.46
  -8   8  -7   -9.21   24.37
  -8   8  -8   78.14   25.01
   8   9  -6   64.50   34.90
   8   9  -5  182.73   47.47
   8  -9  -4   82.38   36.55
   8   9  -4   65.23   31.17
   8  -9  -3  579.02   73.19
   8   9  -3  422.56   62.84
   8  -9  -2   59.14   28.98
   8   9  -2   66.12   23.79
   8   9  -1  220.08   46.71
   8  -9   0    1.38   17.03
   8   9   0   24.18   19.40
   8  -9   1  193.01   44.28
   8  -9   2   69.43   30.89
   8   9   2  102.04   31.07
   8  -9   3  594.84   71.66
   8  -9   5   98.77   32.69
   8  10  -5  117.23   44.25
   8  10  -4  236.84   50.70
   8 -10  -3  -14.48   27.77
   8  10  -3  -11.68   23.67
   8 -10  -2  239.31   50.18
   8  10  -2  254.37   50.08
   8 -10  -1   87.09   35.88
   8 -10   0  342.27   57.67
   8  10   0  353.39   53.73
   8 -10   1   45.53   27.27
   8  10   1   22.40   19.46
   8 -10   2  229.84   49.68
   8 -10   4  257.13   51.56
   8  11  -3  115.24   38.29
   8  11  -2    2.18   24.42
   8 -11  -1  334.62   58.96
   8  11  -1  298.56   59.20
   8 -11   0   33.72   27.58
   8 -11   1  304.28   60.64
   8 -11   2  -35.36   29.02
   8 -11   3   96.31   36.18
   8 -12   1  -42.14   34.53
   8 -12   2  195.62   58.02
   9   0  -7   94.43   24.89
   9   0  -6   -1.19   16.68
   9   0  -6   -8.29   21.21
   9   0  -5   17.33   15.55
  -9   0   5   12.93   21.24
   9   0  -5   71.52   28.02
  -9   0   4  -15.21   28.97
   9   0  -4   -1.11   14.84
  -9   0   3  752.41   83.79
   9   0  -3  859.21   79.52
  -9   0   2  -23.56   28.47
   9   0  -2   -0.17   13.80
   9   0  -1  441.37   58.30
   9   0   0   -0.17   14.94
   9   0   1  408.22   55.19
   9   0   2    0.51   12.31
   9   0   3  700.33   71.98
   9   0   5   29.16   21.43
   9   1  -8   92.43   26.15
   9  -1  -7  -18.35   17.16
   9   1  -7   26.60   18.36
   9  -1  -6  156.17   34.67
   9   1  -6  155.66   33.15
   9  -1  -6  237.47   48.61
   9   1  -6  233.10   47.02
   9  -1  -5   44.47   22.32
   9   1  -5   -5.28   14.61
  -9   1   5  -43.93   28.26
  -9  -1   5   29.30   23.45
   9  -1  -5    7.90   18.32
   9   1  -5   20.74   18.72
  -9   1   4  143.99   30.60
  -9   1   4  207.71   45.16
   9  -1  -4  252.97   46.85
   9   1  -4  218.62   41.45
  -9   1   3   -1.10   14.55
  -9  -1   3   21.49   20.88
   9  -1  -3   14.59   14.66
  -9   1   2  315.88   45.71
   9   1  -2  355.93   49.32
  -9   1   1   -0.14   11.57
   9  -1  -1  -13.33   18.62
   9   1  -1  -13.32   14.55
   9   1   0  319.12   51.84
   9  -1   0  373.23   52.73
   9  -1   1    6.78   15.50
   9   1   1   -1.08   12.39
   9   1   2  357.21   52.44
   9  -1   2  399.08   57.41
   9  -1   3   19.51   14.40
   9   1   3   30.69   17.42
   9   1   4  221.58   40.20
   9  -1   5   41.60   17.63
   9   1   5   -5.46   20.63
   9   2  -8  -29.73   27.14
   9  -2  -7   79.09   26.00
   9   2  -7   76.79   25.06
   9  -2  -6   -0.68   16.41
   9  -2  -6  -27.39   29.49
   9   2  -6  -12.82   26.58
   9  -2  -5  414.16   60.02
   9   2  -5  418.06   60.90
  -9  -2   4    0.39   24.86
   9  -2  -4  -35.73   27.38
   9   2  -4   26.68   20.28
  -9   2   3  152.54   38.67
   9  -2  -3  114.12   36.17
  -9  -2   3  123.76   40.52
  -9   2   2   29.08   12.58
   9   2  -2   -3.19   17.61
  -9   2   1  464.73   54.44
   9   2  -1  394.01   55.67
   9  -2  -1  433.37   55.45
  -9   2   0    5.92   12.93
   9  -2   0    8.52   16.82
   9   2   0   -1.42   16.92
   9  -2   1  375.51   54.41
   9   2   1  454.16   57.82
   9  -2   2    8.45   16.54
   9   2   2   -0.33   13.27
   9  -2   3  100.45   30.37
   9   2   3  117.53   30.50
   9   2   4  -15.39   20.51
   9  -2   5  384.28   54.73
   9   2   5  336.22   52.67
   9   3  -8   54.51   20.69
   9  -3  -7   -8.93   22.32
   9  -3  -6  116.97   28.24
   9   3  -6  226.61   47.50
   9   3  -5  -10.44   19.25
   9  -3  -5    6.70   22.15
   9   3  -5   10.49   17.00
   9   3  -4  270.91   45.65
  -9  -3   4  287.64   61.03
   9  -3  -4  274.68   50.95
   9   3  -3   11.54   14.18
  -9   3   3    1.57   13.46
   9  -3  -3   28.84   19.72
   9   3  -3   23.17   18.68
  -9   3   2  122.74   31.55
   9   3  -2  113.45   33.73
  -9   3   1   60.97   19.51
   9  -3  -1   65.61   23.70
   9   3  -1   45.27   20.25
  -9   3   0   42.73   19.83
   9  -3   0   33.15   16.84
   9   3   0   31.38   19.86
  -9   3  -1   14.00   16.18
   9  -3   1   78.33   25.91
   9   3   1   89.35   26.89
  -9   3  -2  129.82   30.85
   9  -3   2   95.65   28.81
   9   3   2  112.34   30.62
   9  -3   3   -4.68   17.12
   9   3   4  273.95   46.61
   9  -3   5   -9.37   15.37
   9   4  -7  172.79   37.44
   9   4  -6   11.88   17.54
   9  -4  -6    1.08   17.73
   9   4  -6  -17.72   28.47
   9   4  -5  330.12   48.46
   9  -4  -5  350.73   60.49
   9   4  -4   30.82   17.62
   9  -4  -4   56.84   30.03
   9   4  -4   49.03   26.32
   9   4  -3  223.61   39.79
   9  -4  -3  308.95   51.80
   9   4  -3  251.76   45.94
  -9   4   2   43.76   21.59
   9   4  -2   27.49   16.47
   9   4  -2   22.74   19.09
  -9   4   1   14.82   14.59
   9  -4  -1   63.86   25.67
   9   4  -1   41.32   19.24
  -9   4   0    9.67   11.64
   9  -4   0   12.58   19.91
   9   4   0   -5.32   20.46
  -9   4  -1   36.70   18.63
   9  -4   1   23.19   20.47
   9   4   1   46.68   24.05
  -9   4  -2   16.75   14.19
   9  -4   2   30.99   18.63
  -9   4  -3  219.47   40.71
   9  -4   3  287.44   48.77
   9   4   3  211.56   40.85
  -9   4  -4   22.17   19.82
   9  -4   4   30.86   21.02
   9   4   4   -1.76   13.93
   9  -4   5  299.93   48.74
  -9   4  -5  240.62   40.01
   9   5  -8   46.22   26.65
   9   5  -7    1.07   18.80
   9   5  -6  138.78   36.26
   9   5  -5   28.01   24.49
   9   5  -4  156.29   33.04
   9  -5  -4  189.23   45.07
   9   5  -4  159.52   40.53
   9  -5  -3   64.60   25.79
   9   5  -3   46.68   26.78
   9   5  -2  103.85   25.53
   9   5  -2  109.04   32.04
   9   5  -1   52.17   22.01
   9  -5  -1   52.92   23.36
   9   5  -1   28.30   20.75
  -9   5   0  173.86   35.96
   9  -5   0  211.06   43.69
   9   5   0  186.84   38.00
  -9   5  -1   33.06   18.04
   9  -5   1   39.71   17.67
   9   5   1   52.77   23.67
  -9   5  -2   68.67   24.42
   9  -5   2   57.39   23.95
  -9   5  -3   38.97   20.04
   9   5   3   68.50   26.30
  -9   5  -4  132.49   28.78
   9  -5   4  211.23   45.51
  -9   5  -5   34.44   20.80
  -9   5  -6  149.35   32.45
   9   6  -5  142.56   41.33
   9  -6  -4   48.85   28.28
   9   6  -4   57.82   31.54
   9  -6  -3    2.12   18.77
   9   6  -3   55.13   26.66
   9   6  -2   49.78   22.16
   9  -6  -1  261.20   46.97
   9   6  -1  271.84   50.89
   9  -6   0  -12.47   19.81
   9   6   0   17.00   17.16
   9  -6   1  384.60   57.03
   9  -6   2   23.15   17.85
   9   6   2   42.67   20.06
   9  -6   4   80.41   30.84
   9   7  -5  -24.15   29.64
   9   7  -4  185.10   45.48
   9  -7  -3   54.35   30.69
   9   7  -3   44.05   28.25
   9  -7  -2  214.38   43.22
   9   7  -2  261.59   51.48
   9  -7  -1   24.78   24.80
   9  -7   0  157.94   42.67
   9  -7   1   11.95   19.67
   9   7   1   -3.36   21.36
   9  -7   3   63.23   30.02
   9   8  -4   85.80   38.14
   9  -8  -2   45.11   31.19
   9  -8  -1  189.52   47.88
   9   8  -1  157.83   44.32
   9  -8   0    5.30   27.40
   9   8   0   43.95   30.94
   9  -8   1  185.38   48.12
   9  -8   3  379.69   62.57
   9   9  -3  -10.99   27.34
   9   9  -2  221.51   48.15
   9  -9  -1   24.10   30.98
   9  -9   0  142.56   41.66
   9  -9   2  213.78   49.50
   9 -10   1  157.15   44.12
  10   0  -3   20.78   26.32
  10   0  -2   75.33   32.46
  10   0  -1  -31.83   28.33
  10   0   1  -22.47   26.80
  10   0   2   88.81   31.32
  10  -1  -3  173.28   47.22
  10   1  -3  130.57   41.95
  10  -1  -2  121.07   37.23
  10   1  -2   95.67   33.97
  10  -1  -1   85.36   30.50
  10   1  -1  125.45   33.44
  10   1   1   90.39   30.67
  10  -1   2  102.78   33.49
  10  -2  -3   54.47   26.59
  10   2  -3   65.07   41.22
  10  -2  -2  402.62   59.36
  10   2  -2  361.69   58.21
  10  -2  -1  126.00   40.75
  10   2  -1  157.24   38.34
  10  -2   0  -20.49   24.49
  10   2   1  158.27   39.45
  10  -2   2  276.77   47.03
  10   3  -3  102.37   36.48
  10  -3  -2   38.35   24.11
  10   3  -2   58.51   27.76
  10  -3  -1   78.99   32.18
  10   3   0    6.54   20.48
  10  -3   1  124.53   38.94
  10   3   1   80.24   31.75
  10  -3   2  136.03   42.73
  10   4  -3   -9.22   27.37
  10  -4  -2  -18.20   33.93
  10  -4  -1   21.51   23.77
  10   4  -1   25.29   27.00
  10   4   0  501.04   72.36
  10  -4   1   31.72   26.12
  10   5  -2   33.63   25.64
  10  -5  -1  169.11   46.52
  10   5  -1  207.38   50.95
  10  -5   1  103.31   37.58
  10   6  -3  -17.25   37.30
  10  -6   0   52.50   33.37
  10  -6   1   19.86   26.45
   0   0   0    0.00    0.00


TITL mo_NiSO in P2/n
REM P2/n (#13 in standard setting)
CELL 0.71073   6.740226  11.943732  10.660954  90.0000  90.1602  90.0000
ZERR    4.00   0.001380   0.001946   0.001840   0.0000   0.0149   0.0000
LATT  1
SYMM -x+1/2, y,-z+1/2
SFAC C H N O Ni
UNIT 4.00 4.00 4.00 4.00 4.00
REM  CrysAlisPro recorded range (K): Min=100.0; max=100.0; aver:100.0
TEMP -173
TREF
HKLF 4
END
_computing_structure_solution     'SHELXT 2018/2 (Sheldrick, 2018)'
;
_shelx_hkl_checksum                80818
_olex2_submission_special_instructions  'No special instructions were received'
_oxdiff_exptl_absorpt_empirical_details
;
Empirical correction (ABSPACK) includes:
- Absorption correction using spherical harmonics
- Frame scaling
- Detector area scaling
;
_oxdiff_exptl_absorpt_empirical_full_max  1.224
_oxdiff_exptl_absorpt_empirical_full_min  0.826
loop_
  _twin_individual_id
  _twin_individual_mass_fraction_refined
 1 0.71(3)
 2 0.29(3)
